# Supplementary material for: Reference evapotranspiration estimate with missing climatic data and multiple linear regression models
Source: PeerJ. 2023 Apr 27;11:e15252. doi: 10.7717/peerj.15252 (PMC10149056; doi:10.7717/peerj.15252)
Supplement: Data S1 [file peerj-11-15252-s001.xlsx]

## Sheet: ETo-full data
FAO-56 PM Daily ETo estimates (mm/day)
Year	Month	Day	ETo
#	#	#	mm/day
1998	4	1	2.74032
1998	4	2	2.12095
1998	4	3	2.7115
1998	4	4	3.40971
1998	4	5	2.97971
1998	4	6	3.09217
1998	4	7	3.00852
1998	4	8	3.08144
1998	4	9	3.24399
1998	4	10	3.19565
1998	4	11	3.6759
1998	4	12	4.0979
1998	4	13	3.99706
1998	4	14	3.31898
1998	4	15	2.1991
1998	4	16	3.91926
1998	4	17	1.72878
1998	4	18	3.51869
1998	4	19	3.01571
1998	4	20	3.17907
1998	4	21	3.42363
1998	4	22	2.86054
1998	4	23	3.23816
1998	4	24	3.36769
1998	4	25	2.52586
1998	4	26	1.57045
1998	4	27	1.81772
1998	4	28	2.72374
1998	4	29	2.79605
1998	4	30	3.08039
1998	5	1	3.62705
1998	5	2	3.60159
1998	5	3	3.29516
1998	5	4	4.28883
1998	5	5	4.21028
1998	5	6	3.30881
1998	5	7	2.38763
1998	5	8	3.70605
1998	5	9	3.57096
1998	5	10	2.84752
1998	5	11	3.23132
1998	5	12	3.54937
1998	5	13	3.00557
1998	5	14	2.63219
1998	5	15	3.30085
1998	5	16	3.70953
1998	5	17	2.63077
1998	5	18	1.96566
1998	5	19	3.31648
1998	5	20	2.70039
1998	5	21	3.67976
1998	5	22	2.83079
1998	5	23	2.88726
1998	5	24	3.94708
1998	5	25	4.18654
1998	5	26	3.88993
1998	5	27	3.80194
1998	5	28	4.03916
1998	5	29	4.30259
1998	5	30	3.87223
1998	5	31	2.85622
1998	6	1	4.05917
1998	6	2	3.77364
1998	6	3	3.66492
1998	6	4	4.34613
1998	6	5	4.68956
1998	6	6	4.37128
1998	6	7	4.092
1998	6	8	4.16576
1998	6	9	3.65447
1998	6	10	4.13359
1998	6	11	4.3687
1998	6	12	3.19814
1998	6	13	4.70793
1998	6	14	4.75514
1998	6	15	4.75326
1998	6	16	4.35097
1998	6	17	4.60282
1998	6	18	4.10278
1998	6	19	4.57929
1998	6	20	3.17543
1998	6	21	3.95576
1998	6	22	4.37528
1998	6	23	4.71393
1998	6	24	4.70857
1998	6	25	4.7761
1998	6	26	4.71793
1998	6	27	4.43791
1998	6	28	4.68043
1998	6	29	4.78025
1998	6	30	4.9225
1998	7	1	4.88838
1998	7	2	4.83581
1998	7	3	5.23286
1998	7	4	5.03514
1998	7	5	4.16164
1998	7	6	3.27821
1998	7	7	4.07609
1998	7	8	4.27676
1998	7	9	4.24753
1998	7	10	4.78799
1998	7	11	4.79299
1998	7	12	4.86931
1998	7	13	4.86279
1998	7	14	4.86661
1998	7	15	4.76198
1998	7	16	4.20147
1998	7	17	4.16327
1998	7	18	4.29616
1998	7	19	4.65753
1998	7	20	4.52982
1998	7	21	4.41038
1998	7	22	4.56028
1998	7	23	4.59775
1998	7	24	3.43404
1998	7	25	2.8483
1998	7	26	3.681
1998	7	27	3.84385
1998	7	28	4.50138
1998	7	29	4.44112
1998	7	30	4.18523
1998	7	31	3.90703
1998	8	1	3.98641
1998	8	2	4.24335
1998	8	3	4.21297
1998	8	4	4.08808
1998	8	5	4.29983
1998	8	6	4.21813
1998	8	7	4.10563
1998	8	8	4.14009
1998	8	9	4.09314
1998	8	10	4.37034
1998	8	11	4.1518
1998	8	12	4.25506
1998	8	13	4.23917
1998	8	14	4.14241
1998	8	15	3.98341
1998	8	16	4.28676
1998	8	17	3.8303
1998	8	18	4.04083
1998	8	19	4.03215
1998	8	20	4.14786
1998	8	21	4.12475
1998	8	22	3.98336
1998	8	23	3.89594
1998	8	24	3.87157
1998	8	25	3.61109
1998	8	26	3.40043
1998	8	27	3.49473
1998	8	28	3.40567
1998	8	29	3.38292
1998	8	30	3.25851
1998	8	31	3.18417
1998	9	1	3.32426
1998	9	2	3.53744
1998	9	3	3.20326
1998	9	4	2.94821
1998	9	5	3.12055
1998	9	6	3.2588
1998	9	7	3.08034
1998	9	8	3.02103
1998	9	9	3.08539
1998	9	10	3.12641
1998	9	11	3.17911
1998	9	12	2.9102
1998	9	13	2.58751
1998	9	14	3.07473
1998	9	15	2.72175
1998	9	16	2.96048
1998	9	17	2.96109
1998	9	18	3.00306
1998	9	19	2.65451
1998	9	20	2.8131
1998	9	21	2.69085
1998	9	22	2.44217
1998	9	23	2.09179
1998	9	24	2.54536
1998	9	25	2.67062
1998	9	26	2.52097
1998	9	27	2.51857
1998	9	28	2.57165
1998	9	29	2.65635
1998	9	30	2.83603
1998	10	1	3.21431
1998	10	2	2.14163
1998	10	3	2.08954
1998	10	4	2.22411
1998	10	5	2.25717
1998	10	6	2.16295
1998	10	7	2.10569
1998	10	8	3.36281
1998	10	9	4.92998
1998	10	10	2.25836
1998	10	11	1.86237
1998	10	12	2.4295
1998	10	13	3.43373
1998	10	14	2.91891
1998	10	15	2.38487
1998	10	16	2.11101
1998	10	17	2.70931
1998	10	18	2.32329
1998	10	19	1.80462
1998	10	20	1.82445
1998	10	21	1.91375
1998	10	22	1.77961
1998	10	23	1.92421
1998	10	24	1.61982
1998	10	25	1.94455
1998	10	26	1.64281
1998	10	27	1.52408
1998	10	28	0.998312
1998	10	29	2.27589
1998	10	30	1.62723
1998	10	31	1.61344
1999	4	1	2.74429
1999	4	2	2.93531
1999	4	3	2.05916
1999	4	4	2.82063
1999	4	5	2.54663
1999	4	6	3.00976
1999	4	7	1.44237
1999	4	8	3.13267
1999	4	9	3.08318
1999	4	10	2.7143
1999	4	11	2.97943
1999	4	12	1.29144
1999	4	13	3.21721
1999	4	14	3.00448
1999	4	15	3.61892
1999	4	16	3.81686
1999	4	17	3.35977
1999	4	18	3.19844
1999	4	19	3.60617
1999	4	20	2.79159
1999	4	21	2.84647
1999	4	22	4.09525
1999	4	23	3.8604
1999	4	24	3.41976
1999	4	25	4.23201
1999	4	26	4.17961
1999	4	27	4.36974
1999	4	28	3.98304
1999	4	29	3.47763
1999	4	30	4.14429
1999	5	1	4.06634
1999	5	2	4.37638
1999	5	3	4.57585
1999	5	4	4.63627
1999	5	5	4.54521
1999	5	6	4.72414
1999	5	7	3.61626
1999	5	8	4.57145
1999	5	9	3.85949
1999	5	10	4.39409
1999	5	11	4.45045
1999	5	12	4.44969
1999	5	13	4.33985
1999	5	14	3.88814
1999	5	15	4.15395
1999	5	16	4.54897
1999	5	17	4.40331
1999	5	18	4.22811
1999	5	19	4.71097
1999	5	20	6.94367
1999	5	21	4.46551
1999	5	22	4.44944
1999	5	23	4.8167
1999	5	24	5.13201
1999	5	25	5.10375
1999	5	26	2.57421
1999	5	27	4.58211
1999	5	28	4.7543
1999	5	29	4.52086
1999	5	30	4.62624
1999	5	31	4.86613
1999	6	1	4.87181
1999	6	2	5.06725
1999	6	3	5.13605
1999	6	4	4.85821
1999	6	5	5.10476
1999	6	6	4.7682
1999	6	7	5.21998
1999	6	8	5.03481
1999	6	9	4.84037
1999	6	10	4.81498
1999	6	11	3.71829
1999	6	12	4.80763
1999	6	13	4.58811
1999	6	14	3.20425
1999	6	15	4.5665
1999	6	16	4.95011
1999	6	17	5.41882
1999	6	18	5.5327
1999	6	19	5.27686
1999	6	20	5.42484
1999	6	21	5.17223
1999	6	22	4.7595
1999	6	23	5.12882
1999	6	24	4.70103
1999	6	25	5.04808
1999	6	26	4.41492
1999	6	27	4.63808
1999	6	28	4.66811
1999	6	29	5.56526
1999	6	30	5.43392
1999	7	1	5.48408
1999	7	2	4.71909
1999	7	3	4.6185
1999	7	4	5.13198
1999	7	5	5.18473
1999	7	6	5.38275
1999	7	7	5.52007
1999	7	8	4.90379
1999	7	9	5.50193
1999	7	10	5.71504
1999	7	11	5.78041
1999	7	12	5.89731
1999	7	13	5.62847
1999	7	14	5.58003
1999	7	15	4.99788
1999	7	16	3.9637
1999	7	17	4.89905
1999	7	18	4.96996
1999	7	19	5.15062
1999	7	20	5.52974
1999	7	21	5.76884
1999	7	22	5.58686
1999	7	23	5.14532
1999	7	24	5.51501
1999	7	25	5.49964
1999	7	26	4.18713
1999	7	27	4.39678
1999	7	28	4.8573
1999	7	29	5.10895
1999	7	30	4.41928
1999	7	31	4.23597
1999	8	1	4.66775
1999	8	2	4.37055
1999	8	3	4.45862
1999	8	4	4.42042
1999	8	5	4.51388
1999	8	6	4.62172
1999	8	7	5.08391
1999	8	8	4.93861
1999	8	9	4.68245
1999	8	10	4.3802
1999	8	11	4.36222
1999	8	12	4.94573
1999	8	13	5.07655
1999	8	14	4.98144
1999	8	15	4.3247
1999	8	16	4.16255
1999	8	17	4.2336
1999	8	18	4.35994
1999	8	19	4.95661
1999	8	20	4.28404
1999	8	21	3.8248
1999	8	22	3.97582
1999	8	23	3.48823
1999	8	24	4.03244
1999	8	25	4.32928
1999	8	26	4.48733
1999	8	27	4.5282
1999	8	28	5.10568
1999	8	29	4.53118
1999	8	30	4.36339
1999	8	31	4.66558
1999	9	1	4.19153
1999	9	2	3.95688
1999	9	3	4.40916
1999	9	4	3.83658
1999	9	5	3.96049
1999	9	6	3.65806
1999	9	7	3.61916
1999	9	8	3.93489
1999	9	9	3.48499
1999	9	10	3.4373
1999	9	11	3.82892
1999	9	12	2.21081
1999	9	13	3.19168
1999	9	14	3.03059
1999	9	15	2.84909
1999	9	16	3.50099
1999	9	17	3.42056
1999	9	18	3.32453
1999	9	19	3.72573
1999	9	20	3.07226
1999	9	21	3.41931
1999	9	22	3.41287
1999	9	23	3.09536
1999	9	24	3.15393
1999	9	25	3.17268
1999	9	26	3.42187
1999	9	27	3.06821
1999	9	28	3.03709
1999	9	29	3.28872
1999	9	30	4.16677
1999	10	1	2.88109
1999	10	2	2.62288
1999	10	3	2.67829
1999	10	4	2.64881
1999	10	5	2.67231
1999	10	6	2.4658
1999	10	7	2.19778
1999	10	8	2.35027
1999	10	9	1.63327
1999	10	10	2.34846
1999	10	11	1.92525
1999	10	12	3.23339
1999	10	13	2.40093
1999	10	14	2.09874
1999	10	15	2.25406
1999	10	16	2.328
1999	10	17	2.21236
1999	10	18	2.23611
1999	10	19	2.16295
1999	10	20	2.22651
1999	10	21	2.16905
1999	10	22	2.23718
1999	10	23	1.45379
1999	10	24	2.27819
1999	10	25	1.56294
1999	10	26	2.05384
1999	10	27	1.71744
1999	10	28	2.09963
1999	10	29	2.30175
1999	10	30	2.17241
1999	10	31	3.76474
2000	4	1	2.73968
2000	4	2	4.30299
2000	4	3	2.94107
2000	4	4	2.49095
2000	4	5	2.21264
2000	4	6	3.34009
2000	4	7	3.3978
2000	4	8	3.07515
2000	4	9	1.75199
2000	4	10	3.21447
2000	4	11	2.24428
2000	4	12	3.09944
2000	4	13	3.38433
2000	4	14	2.88831
2000	4	15	2.86629
2000	4	16	3.46448
2000	4	17	4.02944
2000	4	18	4.52404
2000	4	19	2.91399
2000	4	20	1.28895
2000	4	21	2.1727
2000	4	22	1.72482
2000	4	23	2.4681
2000	4	24	2.27408
2000	4	25	2.99893
2000	4	26	3.73798
2000	4	27	4.10551
2000	4	28	1.38814
2000	4	29	2.19522
2000	4	30	2.84599
2000	5	1	4.07173
2000	5	2	3.51992
2000	5	3	3.56468
2000	5	4	3.70653
2000	5	5	2.04949
2000	5	6	2.13104
2000	5	7	3.43816
2000	5	8	4.17686
2000	5	9	4.38754
2000	5	10	4.37948
2000	5	11	4.36966
2000	5	12	4.37159
2000	5	13	4.59678
2000	5	14	4.41673
2000	5	15	3.73612
2000	5	16	3.63137
2000	5	17	2.44684
2000	5	18	4.39218
2000	5	19	4.17496
2000	5	20	3.62352
2000	5	21	4.13689
2000	5	22	4.41023
2000	5	23	3.41057
2000	5	24	3.38072
2000	5	25	4.22418
2000	5	26	4.11745
2000	5	27	4.70512
2000	5	28	4.93343
2000	5	29	4.94506
2000	5	30	3.86764
2000	5	31	4.79328
2000	6	1	5.16976
2000	6	2	5.13763
2000	6	3	4.75857
2000	6	4	4.37111
2000	6	5	4.83088
2000	6	6	5.04519
2000	6	7	4.11802
2000	6	8	4.87823
2000	6	9	5.68218
2000	6	10	2.39974
2000	6	11	5.38605
2000	6	12	5.15584
2000	6	13	6.49051
2000	6	14	8.00331
2000	6	15	6.46703
2000	6	16	5.00005
2000	6	17	4.96818
2000	6	18	5.08707
2000	6	19	5.7593
2000	6	20	6.02753
2000	6	21	4.98268
2000	6	22	5.19022
2000	6	23	5.23162
2000	6	24	5.14083
2000	6	25	5.49887
2000	6	26	5.35083
2000	6	27	5.19051
2000	6	28	4.77148
2000	6	29	5.47042
2000	6	30	5.19975
2000	7	1	5.21082
2000	7	2	5.20686
2000	7	3	5.62704
2000	7	4	5.4032
2000	7	5	5.42583
2000	7	6	5.21942
2000	7	7	5.35252
2000	7	8	5.37314
2000	7	9	5.44364
2000	7	10	5.21695
2000	7	11	5.18942
2000	7	12	5.49089
2000	7	13	5.49597
2000	7	14	4.41606
2000	7	15	4.99207
2000	7	16	5.11253
2000	7	17	4.56291
2000	7	18	4.4702
2000	7	19	4.91793
2000	7	20	4.85706
2000	7	21	4.99259
2000	7	22	5.05333
2000	7	23	4.77328
2000	7	24	5.05377
2000	7	25	5.14466
2000	7	26	5.17206
2000	7	27	5.12652
2000	7	28	5.31539
2000	7	29	4.73429
2000	7	30	4.96481
2000	7	31	5.19403
2000	8	1	4.96485
2000	8	2	5.40864
2000	8	3	5.34695
2000	8	4	5.92903
2000	8	5	4.5018
2000	8	6	4.6677
2000	8	7	4.72231
2000	8	8	4.67203
2000	8	9	4.57779
2000	8	10	4.06374
2000	8	11	4.03314
2000	8	12	3.56279
2000	8	13	3.82692
2000	8	14	4.4024
2000	8	15	4.5289
2000	8	16	4.49977
2000	8	17	4.6453
2000	8	18	4.51948
2000	8	19	4.08643
2000	8	20	4.26498
2000	8	21	4.31716
2000	8	22	4.238
2000	8	23	4.15628
2000	8	24	3.4213
2000	8	25	4.14682
2000	8	26	3.4461
2000	8	27	3.53677
2000	8	28	4.23003
2000	8	29	4.03413
2000	8	30	3.99477
2000	8	31	4.42871
2000	9	1	4.08638
2000	9	2	4.16393
2000	9	3	3.58876
2000	9	4	4.02355
2000	9	5	4.16469
2000	9	6	3.55424
2000	9	7	4.34013
2000	9	8	3.89098
2000	9	9	3.87097
2000	9	10	4.0496
2000	9	11	3.83821
2000	9	12	3.99942
2000	9	13	3.64368
2000	9	14	3.38232
2000	9	15	3.46296
2000	9	16	3.42142
2000	9	17	3.26846
2000	9	18	3.60655
2000	9	19	3.79975
2000	9	20	3.8403
2000	9	21	3.61951
2000	9	22	5.11739
2000	9	23	3.79524
2000	9	24	3.50817
2000	9	25	3.34495
2000	9	26	3.06965
2000	9	27	3.2229
2000	9	28	2.20895
2000	9	29	2.03451
2000	9	30	3.21166
2000	10	1	2.58738
2000	10	2	2.94186
2000	10	3	2.55043
2000	10	4	3.23137
2000	10	5	3.31783
2000	10	6	2.77961
2000	10	7	2.79359
2000	10	8	2.43763
2000	10	9	2.74717
2000	10	10	1.51194
2000	10	11	2.44175
2000	10	12	2.19843
2000	10	13	2.89319
2000	10	14	3.468
2000	10	15	3.38268
2000	10	16	2.60365
2000	10	17	2.57686
2000	10	18	2.58936
2000	10	19	2.29272
2000	10	20	0.930601
2000	10	21	2.29461
2000	10	22	1.89415
2000	10	23	1.85284
2000	10	24	1.30468
2000	10	25	1.59209
2000	10	26	1.87461
2000	10	27	2.07709
2000	10	28	1.95004
2000	10	29	1.05567
2000	10	30	2.26771
2000	10	31	2.33413
2001	4	1	4.46101
2001	4	2	1.6958
2001	4	3	3.47675
2001	4	4	3.2574
2001	4	5	2.95191
2001	4	6	2.78482
2001	4	7	2.96776
2001	4	8	3.8918
2001	4	9	3.31822
2001	4	10	2.83829
2001	4	11	3.2366
2001	4	12	3.96323
2001	4	13	3.36142
2001	4	14	1.96264
2001	4	15	3.45722
2001	4	16	3.14691
2001	4	17	3.50472
2001	4	18	3.70887
2001	4	19	3.89711
2001	4	20	3.9823
2001	4	21	3.36446
2001	4	22	3.50126
2001	4	23	4.5255
2001	4	24	4.33928
2001	4	25	4.33103
2001	4	26	3.83245
2001	4	27	4.22546
2001	4	28	4.86903
2001	4	29	5.56483
2001	4	30	5.60161
2001	5	1	4.43129
2001	5	2	6.144
2001	5	3	3.82617
2001	5	4	4.49215
2001	5	5	4.54459
2001	5	6	3.04615
2001	5	7	3.91936
2001	5	8	2.24441
2001	5	9	2.06196
2001	5	10	2.01975
2001	5	11	1.9682
2001	5	12	4.03798
2001	5	13	3.91107
2001	5	14	4.24509
2001	5	15	3.14528
2001	5	16	3.73313
2001	5	17	4.82024
2001	5	18	5.15848
2001	5	19	5.24794
2001	5	20	4.73052
2001	5	21	5.42606
2001	5	22	5.04552
2001	5	23	5.10573
2001	5	24	5.99639
2001	5	25	6.67583
2001	5	26	4.96882
2001	5	27	5.16007
2001	5	28	5.07738
2001	5	29	5.66953
2001	5	30	5.25863
2001	5	31	5.30772
2001	6	1	5.59181
2001	6	2	5.64575
2001	6	3	5.76467
2001	6	4	5.26427
2001	6	5	4.8275
2001	6	6	5.22663
2001	6	7	5.49244
2001	6	8	5.18366
2001	6	9	5.50466
2001	6	10	6.02251
2001	6	11	6.06561
2001	6	12	5.95407
2001	6	13	5.84806
2001	6	14	5.89648
2001	6	15	5.83636
2001	6	16	4.31944
2001	6	17	6.91959
2001	6	18	5.81187
2001	6	19	5.75463
2001	6	20	5.65404
2001	6	21	5.73459
2001	6	22	6.10709
2001	6	23	5.30728
2001	6	24	5.63866
2001	6	25	5.54935
2001	6	26	5.49453
2001	6	27	4.78015
2001	6	28	5.43555
2001	6	29	6.05242
2001	6	30	6.22867
2001	7	1	5.38833
2001	7	2	5.42159
2001	7	3	5.11683
2001	7	4	5.0974
2001	7	5	5.05726
2001	7	6	5.72079
2001	7	7	5.30945
2001	7	8	5.89591
2001	7	9	6.36804
2001	7	10	5.88971
2001	7	11	5.73157
2001	7	12	5.65372
2001	7	13	4.95756
2001	7	14	5.02329
2001	7	15	4.55002
2001	7	16	4.48206
2001	7	17	5.25309
2001	7	18	5.3914
2001	7	19	5.07135
2001	7	20	5.65297
2001	7	21	5.81372
2001	7	22	5.38762
2001	7	23	5.64344
2001	7	24	5.39834
2001	7	25	5.21436
2001	7	26	5.02422
2001	7	27	5.0006
2001	7	28	3.94294
2001	7	29	4.24374
2001	7	30	4.3377
2001	7	31	4.11314
2001	8	1	5.20024
2001	8	2	4.91945
2001	8	3	5.12823
2001	8	4	4.43011
2001	8	5	5.07979
2001	8	6	4.70145
2001	8	7	5.12883
2001	8	8	4.80051
2001	8	9	4.89024
2001	8	10	5.32482
2001	8	11	5.19406
2001	8	12	4.55816
2001	8	13	4.56617
2001	8	14	5.03396
2001	8	15	5.12698
2001	8	16	4.83303
2001	8	17	5.05542
2001	8	18	4.36459
2001	8	19	4.06163
2001	8	20	4.8656
2001	8	21	4.94314
2001	8	22	5.12019
2001	8	23	5.03992
2001	8	24	5.15174
2001	8	25	5.06307
2001	8	26	4.81599
2001	8	27	5.115
2001	8	28	4.8241
2001	8	29	4.80778
2001	8	30	4.6959
2001	8	31	4.75357
2001	9	1	4.47903
2001	9	2	4.42924
2001	9	3	4.38848
2001	9	4	4.10853
2001	9	5	4.40874
2001	9	6	4.19897
2001	9	7	3.22627
2001	9	8	4.22871
2001	9	9	3.81327
2001	9	10	4.24178
2001	9	11	3.70131
2001	9	12	3.87476
2001	9	13	4.01048
2001	9	14	3.76844
2001	9	15	4.00941
2001	9	16	3.88635
2001	9	17	3.97942
2001	9	18	3.97065
2001	9	19	3.93323
2001	9	20	4.00407
2001	9	21	3.85015
2001	9	22	3.71384
2001	9	23	3.72106
2001	9	24	3.84246
2001	9	25	3.74329
2001	9	26	3.45832
2001	9	27	3.64527
2001	9	28	3.8273
2001	9	29	3.90785
2001	9	30	3.71615
2001	10	1	2.99028
2001	10	2	2.92933
2001	10	3	2.81854
2001	10	4	3.08717
2001	10	5	2.75694
2001	10	6	3.22805
2001	10	7	2.99889
2001	10	8	2.93042
2001	10	9	4.35388
2001	10	10	2.87194
2001	10	11	2.7577
2001	10	12	2.70728
2001	10	13	2.36746
2001	10	14	2.46397
2001	10	15	2.62431
2001	10	16	2.76616
2001	10	17	2.54656
2001	10	18	2.57795
2001	10	19	2.95936
2001	10	20	2.39935
2001	10	21	2.59149
2001	10	22	2.46627
2001	10	23	2.67812
2001	10	24	2.64184
2001	10	25	3.03664
2001	10	26	3.63422
2001	10	27	2.85303
2001	10	28	1.53496
2001	10	29	1.81676
2001	10	30	1.99102
2001	10	31	1.96357
2002	4	1	1.53546
2002	4	2	1.98592
2002	4	3	3.288
2002	4	4	1.67658
2002	4	5	3.33261
2002	4	6	1.92789
2002	4	7	3.30571
2002	4	8	2.93949
2002	4	9	3.31957
2002	4	10	3.69638
2002	4	11	3.96889
2002	4	12	3.63671
2002	4	13	1.81506
2002	4	14	3.4274
2002	4	15	2.47895
2002	4	16	1.95728
2002	4	17	3.62063
2002	4	18	2.94741
2002	4	19	1.79813
2002	4	20	2.76972
2002	4	21	3.18008
2002	4	22	2.13044
2002	4	23	2.70571
2002	4	24	2.17836
2002	4	25	3.3889
2002	4	26	3.34027
2002	4	27	3.44821
2002	4	28	3.954
2002	4	29	3.4884
2002	4	30	3.95451
2002	5	1	4.23509
2002	5	2	2.3895
2002	5	3	3.69969
2002	5	4	3.88989
2002	5	5	3.72093
2002	5	6	4.81647
2002	5	7	4.26487
2002	5	8	4.14161
2002	5	9	4.8285
2002	5	10	4.58899
2002	5	11	4.49398
2002	5	12	3.81513
2002	5	13	3.89265
2002	5	14	2.45442
2002	5	15	2.87881
2002	5	16	4.40795
2002	5	17	4.31658
2002	5	18	2.4038
2002	5	19	4.00557
2002	5	20	4.48821
2002	5	21	4.22899
2002	5	22	4.51183
2002	5	23	3.27202
2002	5	24	4.61788
2002	5	25	4.85464
2002	5	26	5.32793
2002	5	27	4.49287
2002	5	28	4.39414
2002	5	29	4.02274
2002	5	30	4.58925
2002	5	31	4.53689
2002	6	1	3.18313
2002	6	2	4.6623
2002	6	3	5.20299
2002	6	4	4.55623
2002	6	5	3.67692
2002	6	6	4.93375
2002	6	7	5.37389
2002	6	8	4.9303
2002	6	9	5.49133
2002	6	10	5.52072
2002	6	11	5.47261
2002	6	12	4.74747
2002	6	13	5.02829
2002	6	14	5.44521
2002	6	15	5.3582
2002	6	16	4.74165
2002	6	17	4.54077
2002	6	18	5.13659
2002	6	19	6.75725
2002	6	20	6.19138
2002	6	21	7.51953
2002	6	22	5.38212
2002	6	23	5.39072
2002	6	24	5.22538
2002	6	25	5.10903
2002	6	26	3.8961
2002	6	27	5.03295
2002	6	28	4.65925
2002	6	29	5.35527
2002	6	30	5.68488
2002	7	1	5.04168
2002	7	2	4.6613
2002	7	3	4.84904
2002	7	4	5.55604
2002	7	5	5.72507
2002	7	6	5.62484
2002	7	7	5.6402
2002	7	8	4.99157
2002	7	9	4.70982
2002	7	10	5.1667
2002	7	11	4.52065
2002	7	12	4.58957
2002	7	13	4.25163
2002	7	14	4.31455
2002	7	15	5.35668
2002	7	16	5.61327
2002	7	17	5.8019
2002	7	18	5.72462
2002	7	19	5.43484
2002	7	20	5.55924
2002	7	21	5.23125
2002	7	22	4.95703
2002	7	23	5.03883
2002	7	24	6.65979
2002	7	25	5.95942
2002	7	26	5.329
2002	7	27	5.09231
2002	7	28	5.45092
2002	7	29	5.57728
2002	7	30	5.59705
2002	7	31	5.59529
2002	8	1	5.33185
2002	8	2	5.60477
2002	8	3	4.50297
2002	8	4	4.54122
2002	8	5	4.76047
2002	8	6	4.9582
2002	8	7	5.18527
2002	8	8	4.81974
2002	8	9	4.60315
2002	8	10	4.96406
2002	8	11	5.34546
2002	8	12	5.66269
2002	8	13	5.40699
2002	8	14	4.928
2002	8	15	4.67316
2002	8	16	4.17677
2002	8	17	4.17924
2002	8	18	3.31666
2002	8	19	4.37036
2002	8	20	4.5184
2002	8	21	4.25968
2002	8	22	4.55493
2002	8	23	4.91813
2002	8	24	4.97452
2002	8	25	4.92916
2002	8	26	5.00399
2002	8	27	4.93154
2002	8	28	4.71022
2002	8	29	4.86456
2002	8	30	4.56524
2002	8	31	4.14941
2002	9	1	3.97581
2002	9	2	4.18005
2002	9	3	4.14112
2002	9	4	4.04602
2002	9	5	3.54231
2002	9	6	3.8464
2002	9	7	3.40561
2002	9	8	3.67758
2002	9	9	4.03185
2002	9	10	3.31849
2002	9	11	3.59597
2002	9	12	3.23729
2002	9	13	3.75802
2002	9	14	3.62782
2002	9	15	3.68398
2002	9	16	3.67305
2002	9	17	3.78813
2002	9	18	3.87318
2002	9	19	4.32194
2002	9	20	3.62614
2002	9	21	3.9602
2002	9	22	4.15627
2002	9	23	3.49633
2002	9	24	3.15119
2002	9	25	3.41097
2002	9	26	3.28084
2002	9	27	3.14065
2002	9	28	3.43173
2002	9	29	3.39985
2002	9	30	3.31849
2002	10	1	2.78046
2002	10	2	1.98066
2002	10	3	3.08205
2002	10	4	2.66046
2002	10	5	2.65277
2002	10	6	2.7363
2002	10	7	1.96004
2002	10	8	2.55881
2002	10	9	2.55378
2002	10	10	2.65602
2002	10	11	2.66633
2002	10	12	2.65359
2002	10	13	2.7336
2002	10	14	1.8316
2002	10	15	2.66097
2002	10	16	1.96396
2002	10	17	2.13427
2002	10	18	2.52691
2002	10	19	2.46584
2002	10	20	2.25592
2002	10	21	3.81198
2002	10	22	2.62094
2002	10	23	2.24123
2002	10	24	2.21084
2002	10	25	2.08859
2002	10	26	2.1744
2002	10	27	2.27737
2002	10	28	2.1909
2002	10	29	2.22505
2002	10	30	3.73411
2002	10	31	2.22904
2003	4	1	2.99259
2003	4	2	2.35287
2003	4	3	3.16313
2003	4	4	3.73815
2003	4	5	3.78239
2003	4	6	3.84597
2003	4	7	3.00331
2003	4	8	3.72032
2003	4	9	3.42812
2003	4	10	3.31858
2003	4	11	3.83932
2003	4	12	3.83067
2003	4	13	3.68871
2003	4	14	2.08426
2003	4	15	1.44931
2003	4	16	3.32203
2003	4	17	2.0137
2003	4	18	1.63594
2003	4	19	3.42779
2003	4	20	2.31818
2003	4	21	2.62057
2003	4	22	3.13678
2003	4	23	2.01448
2003	4	24	3.51757
2003	4	25	1.01636
2003	4	26	2.18971
2003	4	27	4.19685
2003	4	28	3.8482
2003	4	29	2.90478
2003	4	30	3.78062
2003	5	1	4.68524
2003	5	2	5.67676
2003	5	3	5.16127
2003	5	4	5.39597
2003	5	5	5.30736
2003	5	6	5.34394
2003	5	7	6.93122
2003	5	8	6.50763
2003	5	9	6.17696
2003	5	10	5.87816
2003	5	11	5.77667
2003	5	12	5.30852
2003	5	13	5.21726
2003	5	14	5.46076
2003	5	15	4.21416
2003	5	16	4.72843
2003	5	17	4.55348
2003	5	18	5.21905
2003	5	19	5.28778
2003	5	20	5.15958
2003	5	21	4.67023
2003	5	22	4.72355
2003	5	23	5.03451
2003	5	24	4.94353
2003	5	25	5.46132
2003	5	26	4.86623
2003	5	27	4.89367
2003	5	28	3.98446
2003	5	29	3.18624
2003	5	30	2.95091
2003	5	31	2.36862
2003	6	1	4.49216
2003	6	2	3.88288
2003	6	3	4.43513
2003	6	4	4.87725
2003	6	5	6.17669
2003	6	6	6.02311
2003	6	7	5.67673
2003	6	8	3.16381
2003	6	9	4.3511
2003	6	10	4.06771
2003	6	11	4.54371
2003	6	12	4.1812
2003	6	13	5.24422
2003	6	14	5.59882
2003	6	15	5.63862
2003	6	16	5.47385
2003	6	17	4.68541
2003	6	18	5.54025
2003	6	19	5.59297
2003	6	20	5.18259
2003	6	21	4.5104
2003	6	22	4.45969
2003	6	23	5.42122
2003	6	24	5.76902
2003	6	25	6.11068
2003	6	26	5.6294
2003	6	27	5.07363
2003	6	28	4.68692
2003	6	29	5.29741
2003	6	30	5.70774
2003	7	1	5.91088
2003	7	2	5.55066
2003	7	3	5.72415
2003	7	4	5.76501
2003	7	5	5.92507
2003	7	6	4.01945
2003	7	7	4.77281
2003	7	8	5.34512
2003	7	9	4.69514
2003	7	10	5.20797
2003	7	11	5.51269
2003	7	12	5.56036
2003	7	13	5.25678
2003	7	14	4.88398
2003	7	15	4.94282
2003	7	16	5.31529
2003	7	17	5.25279
2003	7	18	5.44032
2003	7	19	5.80401
2003	7	20	5.57669
2003	7	21	5.27952
2003	7	22	5.34253
2003	7	23	5.48498
2003	7	24	5.1952
2003	7	25	5.05565
2003	7	26	5.22715
2003	7	27	5.00425
2003	7	28	5.05534
2003	7	29	4.92682
2003	7	30	5.08994
2003	7	31	4.83894
2003	8	1	4.98453
2003	8	2	4.93868
2003	8	3	4.88334
2003	8	4	4.57773
2003	8	5	4.03817
2003	8	6	4.49031
2003	8	7	4.77938
2003	8	8	3.82767
2003	8	9	4.48239
2003	8	10	4.60971
2003	8	11	4.88063
2003	8	12	4.38064
2003	8	13	4.68503
2003	8	14	4.66228
2003	8	15	4.31138
2003	8	16	4.29912
2003	8	17	4.81289
2003	8	18	4.66528
2003	8	19	4.30523
2003	8	20	4.74232
2003	8	21	4.34389
2003	8	22	4.53466
2003	8	23	4.62343
2003	8	24	4.53009
2003	8	25	4.05276
2003	8	26	4.29932
2003	8	27	3.79939
2003	8	28	3.96663
2003	8	29	4.16643
2003	8	30	4.4036
2003	8	31	4.53355
2003	9	1	4.19789
2003	9	2	3.78758
2003	9	3	3.76332
2003	9	4	3.41733
2003	9	5	3.21656
2003	9	6	4.15795
2003	9	7	4.40854
2003	9	8	3.71475
2003	9	9	3.57583
2003	9	10	3.33092
2003	9	11	2.92158
2003	9	12	3.48673
2003	9	13	3.37991
2003	9	14	3.3308
2003	9	15	3.01699
2003	9	16	3.12525
2003	9	17	2.81931
2003	9	18	4.25021
2003	9	19	3.6508
2003	9	20	3.94027
2003	9	21	5.25383
2003	9	22	4.60163
2003	9	23	4.43024
2003	9	24	3.34673
2003	9	25	3.02496
2003	9	26	3.22851
2003	9	27	3.10891
2003	9	28	2.81473
2003	9	29	3.10143
2003	9	30	3.22169
2003	10	1	2.09192
2003	10	2	2.34338
2003	10	3	2.50199
2003	10	4	2.72887
2003	10	5	2.67452
2003	10	6	2.56747
2003	10	7	2.636
2003	10	8	2.35601
2003	10	9	2.14622
2003	10	10	2.44195
2003	10	11	2.66544
2003	10	12	2.32684
2003	10	13	2.20156
2003	10	14	2.17391
2003	10	15	2.51234
2003	10	16	2.47779
2003	10	17	2.25216
2003	10	18	2.12833
2003	10	19	2.16608
2003	10	20	1.81148
2003	10	21	2.07486
2003	10	22	2.14656
2003	10	23	2.21895
2003	10	24	1.39588
2003	10	25	2.11295
2003	10	26	1.98092
2003	10	27	2.83799
2003	10	28	2.05671
2003	10	29	2.87199
2003	10	30	1.9119
2003	10	31	0.901856
2004	4	1	2.9297
2004	4	2	3.37115
2004	4	3	4.43566
2004	4	4	4.83576
2004	4	5	3.60639
2004	4	6	2.5232
2004	4	7	3.19949
2004	4	8	3.03281
2004	4	9	3.00628
2004	4	10	3.90843
2004	4	11	3.96105
2004	4	12	3.94319
2004	4	13	3.58973
2004	4	14	3.15324
2004	4	15	3.65896
2004	4	16	4.16895
2004	4	17	3.51024
2004	4	18	1.62017
2004	4	19	3.67218
2004	4	20	2.99138
2004	4	21	1.3051
2004	4	22	3.19388
2004	4	23	2.56773
2004	4	24	3.03731
2004	4	25	3.24242
2004	4	26	4.21538
2004	4	27	5.29978
2004	4	28	3.95551
2004	4	29	4.41352
2004	4	30	2.73672
2004	5	1	3.7965
2004	5	2	3.56917
2004	5	3	2.84516
2004	5	4	3.36377
2004	5	5	3.64407
2004	5	6	3.78425
2004	5	7	4.60659
2004	5	8	3.11332
2004	5	9	3.59026
2004	5	10	5.95142
2004	5	11	3.025
2004	5	12	3.88778
2004	5	13	4.22465
2004	5	14	3.97434
2004	5	15	3.17949
2004	5	16	3.98997
2004	5	17	2.68841
2004	5	18	4.22434
2004	5	19	3.6808
2004	5	20	4.7613
2004	5	21	4.68892
2004	5	22	4.37355
2004	5	23	4.337
2004	5	24	4.44895
2004	5	25	4.4818
2004	5	26	4.51651
2004	5	27	4.40731
2004	5	28	4.576
2004	5	29	4.25154
2004	5	30	4.56051
2004	5	31	3.61743
2004	6	1	4.17014
2004	6	2	3.94516
2004	6	3	4.34686
2004	6	4	4.60341
2004	6	5	4.78592
2004	6	6	4.89911
2004	6	7	5.0586
2004	6	8	4.3531
2004	6	9	4.8826
2004	6	10	5.19806
2004	6	11	5.26073
2004	6	12	5.1128
2004	6	13	5.13054
2004	6	14	5.06913
2004	6	15	5.24307
2004	6	16	4.85636
2004	6	17	4.90701
2004	6	18	4.92615
2004	6	19	4.30464
2004	6	20	5.12719
2004	6	21	4.56553
2004	6	22	4.31993
2004	6	23	4.17248
2004	6	24	4.64124
2004	6	25	4.54733
2004	6	26	4.95063
2004	6	27	5.32793
2004	6	28	5.23187
2004	6	29	6.00069
2004	6	30	5.38292
2004	7	1	5.20188
2004	7	2	5.57544
2004	7	3	5.33506
2004	7	4	5.26054
2004	7	5	5.5344
2004	7	6	5.75361
2004	7	7	5.57937
2004	7	8	5.21603
2004	7	9	4.36678
2004	7	10	5.6467
2004	7	11	5.67838
2004	7	12	5.1478
2004	7	13	5.24597
2004	7	14	4.61886
2004	7	15	5.69289
2004	7	16	4.85597
2004	7	17	5.46293
2004	7	18	5.34573
2004	7	19	5.57853
2004	7	20	5.36121
2004	7	21	5.04865
2004	7	22	5.28247
2004	7	23	5.34559
2004	7	24	4.98856
2004	7	25	4.85871
2004	7	26	4.37658
2004	7	27	4.17411
2004	7	28	4.09475
2004	7	29	4.76613
2004	7	30	4.88448
2004	7	31	4.67656
2004	8	1	4.19839
2004	8	2	4.6071
2004	8	3	4.2743
2004	8	4	4.48312
2004	8	5	4.26912
2004	8	6	4.34
2004	8	7	4.11036
2004	8	8	3.97043
2004	8	9	4.33918
2004	8	10	3.83328
2004	8	11	3.86332
2004	8	12	4.99379
2004	8	13	4.99371
2004	8	14	4.98959
2004	8	15	4.52236
2004	8	16	4.37666
2004	8	17	4.34923
2004	8	18	4.54891
2004	8	19	4.44587
2004	8	20	4.60074
2004	8	21	4.47626
2004	8	22	4.61037
2004	8	23	4.27766
2004	8	24	4.56685
2004	8	25	4.77129
2004	8	26	4.8437
2004	8	27	4.74284
2004	8	28	4.37813
2004	8	29	4.22415
2004	8	30	4.21399
2004	8	31	4.01077
2004	9	1	3.80732
2004	9	2	3.7648
2004	9	3	4.1268
2004	9	4	4.00992
2004	9	5	4.03029
2004	9	6	4.55292
2004	9	7	4.08527
2004	9	8	3.82541
2004	9	9	4.05972
2004	9	10	3.69105
2004	9	11	4.49116
2004	9	12	5.99708
2004	9	13	3.71055
2004	9	14	3.80109
2004	9	15	3.7376
2004	9	16	3.80884
2004	9	17	3.6277
2004	9	18	3.79081
2004	9	19	3.54032
2004	9	20	3.63537
2004	9	21	3.62957
2004	9	22	3.39737
2004	9	23	3.22833
2004	9	24	3.40301
2004	9	25	3.38769
2004	9	26	3.28832
2004	9	27	3.26196
2004	9	28	3.34264
2004	9	29	3.38194
2004	9	30	3.25503
2004	10	1	2.85413
2004	10	2	3.28062
2004	10	3	2.49704
2004	10	4	2.58601
2004	10	5	3.55262
2004	10	6	2.45916
2004	10	7	2.11594
2004	10	8	2.71597
2004	10	9	2.50405
2004	10	10	2.66027
2004	10	11	2.66019
2004	10	12	3.03876
2004	10	13	2.57017
2004	10	14	2.58091
2004	10	15	2.55292
2004	10	16	2.2935
2004	10	17	2.49451
2004	10	18	2.63693
2004	10	19	2.59633
2004	10	20	2.42976
2004	10	21	2.76972
2004	10	22	2.29695
2004	10	23	2.41178
2004	10	24	2.85332
2004	10	25	3.22765
2004	10	26	3.31578
2004	10	27	3.49123
2004	10	28	2.94075
2004	10	29	2.73991
2004	10	30	2.03899
2004	10	31	2.49222
2005	4	1	3.53152
2005	4	2	2.18641
2005	4	3	1.7393
2005	4	4	2.60093
2005	4	5	3.48102
2005	4	6	3.74359
2005	4	7	3.64914
2005	4	8	4.78107
2005	4	9	4.38098
2005	4	10	3.8563
2005	4	11	4.40107
2005	4	12	4.10114
2005	4	13	5.21614
2005	4	14	3.97971
2005	4	15	3.38203
2005	4	16	2.7218
2005	4	17	2.98636
2005	4	18	1.74854
2005	4	19	3.28977
2005	4	20	3.35396
2005	4	21	3.63706
2005	4	22	1.57898
2005	4	23	3.30563
2005	4	24	4.17024
2005	4	25	3.85272
2005	4	26	3.83784
2005	4	27	3.42226
2005	4	28	3.69732
2005	4	29	3.53528
2005	4	30	2.55861
2005	5	1	2.8128
2005	5	2	3.73506
2005	5	3	4.1671
2005	5	4	4.14827
2005	5	5	4.29405
2005	5	6	2.09436
2005	5	7	3.83754
2005	5	8	3.45264
2005	5	9	3.68054
2005	5	10	4.39703
2005	5	11	4.77312
2005	5	12	4.68206
2005	5	13	3.39873
2005	5	14	4.77669
2005	5	15	4.72993
2005	5	16	3.56301
2005	5	17	4.65547
2005	5	18	5.10538
2005	5	19	5.08936
2005	5	20	4.88349
2005	5	21	4.26696
2005	5	22	4.8262
2005	5	23	4.28684
2005	5	24	4.17917
2005	5	25	3.90351
2005	5	26	4.17682
2005	5	27	5.07035
2005	5	28	4.04735
2005	5	29	3.10672
2005	5	30	2.76038
2005	5	31	2.67948
2005	6	1	2.36364
2005	6	2	3.93141
2005	6	3	4.27551
2005	6	4	4.30083
2005	6	5	4.86901
2005	6	6	4.76881
2005	6	7	5.08581
2005	6	8	5.17476
2005	6	9	4.77693
2005	6	10	2.97982
2005	6	11	4.05965
2005	6	12	4.28914
2005	6	13	4.54264
2005	6	14	5.12276
2005	6	15	4.24302
2005	6	16	5.02778
2005	6	17	5.41218
2005	6	18	5.10717
2005	6	19	4.6277
2005	6	20	4.65255
2005	6	21	3.95462
2005	6	22	5.16341
2005	6	23	5.87348
2005	6	24	5.37508
2005	6	25	5.20871
2005	6	26	5.39897
2005	6	27	5.59125
2005	6	28	5.36748
2005	6	29	4.93239
2005	6	30	4.49837
2005	7	1	5.02707
2005	7	2	4.44972
2005	7	3	4.37349
2005	7	4	4.90506
2005	7	5	4.31745
2005	7	6	4.79511
2005	7	7	4.74117
2005	7	8	4.90545
2005	7	9	5.11431
2005	7	10	4.99024
2005	7	11	5.1262
2005	7	12	5.22272
2005	7	13	4.94527
2005	7	14	4.19603
2005	7	15	4.70121
2005	7	16	4.76058
2005	7	17	5.30206
2005	7	18	5.28395
2005	7	19	5.43091
2005	7	20	5.4627
2005	7	21	5.37314
2005	7	22	4.92728
2005	7	23	4.6205
2005	7	24	4.56665
2005	7	25	4.43228
2005	7	26	4.62655
2005	7	27	5.10427
2005	7	28	4.85798
2005	7	29	4.75519
2005	7	30	3.99932
2005	7	31	3.67164
2005	8	1	4.24391
2005	8	2	3.76002
2005	8	3	4.92082
2005	8	4	5.04883
2005	8	5	4.52673
2005	8	6	4.85738
2005	8	7	5.03531
2005	8	8	4.72425
2005	8	9	4.77167
2005	8	10	4.42151
2005	8	11	4.65816
2005	8	12	4.88635
2005	8	13	4.94557
2005	8	14	5.08021
2005	8	15	4.88985
2005	8	16	4.64022
2005	8	17	4.45092
2005	8	18	4.77194
2005	8	19	4.6122
2005	8	20	4.10392
2005	8	21	4.31343
2005	8	22	4.75291
2005	8	23	4.77057
2005	8	24	4.36268
2005	8	25	4.43033
2005	8	26	4.35501
2005	8	27	4.67585
2005	8	28	4.41605
2005	8	29	4.51598
2005	8	30	4.81843
2005	8	31	5.43926
2005	9	1	4.41663
2005	9	2	3.77097
2005	9	3	3.3926
2005	9	4	3.43963
2005	9	5	4.84138
2005	9	6	4.40752
2005	9	7	3.98525
2005	9	8	3.98128
2005	9	9	3.79568
2005	9	10	3.86025
2005	9	11	3.84487
2005	9	12	3.94197
2005	9	13	3.9845
2005	9	14	3.76303
2005	9	15	3.6269
2005	9	16	3.42015
2005	9	17	3.35183
2005	9	18	3.42521
2005	9	19	3.68431
2005	9	20	3.52472
2005	9	21	3.44834
2005	9	22	3.76797
2005	9	23	3.3968
2005	9	24	3.26155
2005	9	25	3.40224
2005	9	26	3.33959
2005	9	27	3.34034
2005	9	28	2.71393
2005	9	29	2.00378
2005	9	30	3.12147
2005	10	1	2.79708
2005	10	2	2.50998
2005	10	3	2.55539
2005	10	4	2.72305
2005	10	5	3.27036
2005	10	6	2.51647
2005	10	7	2.50286
2005	10	8	2.8312
2005	10	9	2.2592
2005	10	10	2.73184
2005	10	11	2.11775
2005	10	12	2.54992
2005	10	13	2.26006
2005	10	14	2.5413
2005	10	15	2.44921
2005	10	16	1.70925
2005	10	17	2.39205
2005	10	18	1.65467
2005	10	19	1.54898
2005	10	20	2.5214
2005	10	21	2.17633
2005	10	22	2.69797
2005	10	23	2.69943
2005	10	24	2.53864
2005	10	25	2.46983
2005	10	26	2.27687
2005	10	27	2.21363
2005	10	28	2.04464
2005	10	29	2.31135
2005	10	30	3.30167
2005	10	31	1.90645
2006	4	1	2.75636
2006	4	2	1.30021
2006	4	3	3.22873
2006	4	4	2.81344
2006	4	5	2.15708
2006	4	6	2.85948
2006	4	7	1.31132
2006	4	8	2.40407
2006	4	9	4.31795
2006	4	10	2.75191
2006	4	11	2.80484
2006	4	12	1.54354
2006	4	13	1.74568
2006	4	14	3.2609
2006	4	15	3.42227
2006	4	16	2.95427
2006	4	17	2.1686
2006	4	18	2.02123
2006	4	19	3.23245
2006	4	20	2.08584
2006	4	21	2.686
2006	4	22	2.63664
2006	4	23	4.43176
2006	4	24	1.69509
2006	4	25	4.48065
2006	4	26	5.12457
2006	4	27	3.73464
2006	4	28	2.71432
2006	4	29	4.46582
2006	4	30	3.19683
2006	5	1	3.65864
2006	5	2	3.3341
2006	5	3	3.59908
2006	5	4	4.05389
2006	5	5	3.74217
2006	5	6	3.91591
2006	5	7	4.27744
2006	5	8	4.41856
2006	5	9	4.01009
2006	5	10	3.82659
2006	5	11	3.93051
2006	5	12	4.3841
2006	5	13	4.14507
2006	5	14	4.63984
2006	5	15	4.82275
2006	5	16	4.06377
2006	5	17	1.95859
2006	5	18	3.715
2006	5	19	4.27776
2006	5	20	4.4277
2006	5	21	3.8992
2006	5	22	4.12418
2006	5	23	4.2883
2006	5	24	5.14722
2006	5	25	5.26407
2006	5	26	5.09749
2006	5	27	4.64269
2006	5	28	4.54611
2006	5	29	4.70326
2006	5	30	4.71553
2006	5	31	5.12061
2006	6	1	4.18723
2006	6	2	4.57206
2006	6	3	4.58931
2006	6	4	4.76791
2006	6	5	4.66345
2006	6	6	4.88012
2006	6	7	4.6472
2006	6	8	4.539
2006	6	9	4.87548
2006	6	10	4.79764
2006	6	11	4.72279
2006	6	12	4.77337
2006	6	13	4.24388
2006	6	14	4.38993
2006	6	15	4.73192
2006	6	16	4.57301
2006	6	17	4.78335
2006	6	18	5.13708
2006	6	19	5.14249
2006	6	20	5.04497
2006	6	21	5.00706
2006	6	22	4.47936
2006	6	23	4.19186
2006	6	24	4.58157
2006	6	25	4.37191
2006	6	26	4.53283
2006	6	27	4.06517
2006	6	28	4.48126
2006	6	29	3.29135
2006	6	30	4.43993
2006	7	1	4.88943
2006	7	2	4.86667
2006	7	3	4.27635
2006	7	4	4.12296
2006	7	5	4.04286
2006	7	6	4.52825
2006	7	7	4.64129
2006	7	8	5.0027
2006	7	9	4.89278
2006	7	10	4.71649
2006	7	11	4.56961
2006	7	12	4.94785
2006	7	13	4.02385
2006	7	14	3.78516
2006	7	15	4.39966
2006	7	16	4.7519
2006	7	17	4.7087
2006	7	18	4.9382
2006	7	19	5.04274
2006	7	20	5.23547
2006	7	21	4.89071
2006	7	22	4.68969
2006	7	23	4.49569
2006	7	24	4.55306
2006	7	25	4.76202
2006	7	26	4.59293
2006	7	27	4.58788
2006	7	28	4.70448
2006	7	29	5.17081
2006	7	30	5.13462
2006	7	31	4.75746
2006	8	1	3.70155
2006	8	2	4.34451
2006	8	3	4.52237
2006	8	4	4.34809
2006	8	5	4.0246
2006	8	6	4.63425
2006	8	7	3.89184
2006	8	8	4.12569
2006	8	9	4.22441
2006	8	10	4.46025
2006	8	11	4.27274
2006	8	12	4.43756
2006	8	13	4.17695
2006	8	14	4.37501
2006	8	15	4.42898
2006	8	16	4.42331
2006	8	17	4.10358
2006	8	18	4.50104
2006	8	19	4.34792
2006	8	20	4.82157
2006	8	21	4.71776
2006	8	22	4.63438
2006	8	23	4.5866
2006	8	24	4.40482
2006	8	25	4.1965
2006	8	26	4.1408
2006	8	27	4.07479
2006	8	28	3.77646
2006	8	29	4.04853
2006	8	30	4.41592
2006	8	31	4.00916
2006	9	1	4.02728
2006	9	2	3.56987
2006	9	3	3.88211
2006	9	4	4.03276
2006	9	5	4.43215
2006	9	6	4.09067
2006	9	7	4.55303
2006	9	8	4.01186
2006	9	9	3.90415
2006	9	10	3.75003
2006	9	11	3.6737
2006	9	12	3.82066
2006	9	13	4.22516
2006	9	14	3.72833
2006	9	15	3.67658
2006	9	16	3.70807
2006	9	17	3.87539
2006	9	18	3.63578
2006	9	19	3.42965
2006	9	20	3.59311
2006	9	21	3.37526
2006	9	22	2.488
2006	9	23	2.62585
2006	9	24	3.42699
2006	9	25	1.7188
2006	9	26	3.01052
2006	9	27	3.36888
2006	9	28	3.02835
2006	9	29	1.81639
2006	9	30	3.49886
2006	10	1	2.25355
2006	10	2	2.71782
2006	10	3	2.80439
2006	10	4	2.67124
2006	10	5	2.79674
2006	10	6	2.59554
2006	10	7	2.57476
2006	10	8	2.47708
2006	10	9	2.51622
2006	10	10	2.34815
2006	10	11	2.40451
2006	10	12	2.43372
2006	10	13	2.36718
2006	10	14	2.0704
2006	10	15	1.89906
2006	10	16	2.31234
2006	10	17	1.4479
2006	10	18	2.69053
2006	10	19	2.79183
2006	10	20	1.63213
2006	10	21	2.19557
2006	10	22	2.07583
2006	10	23	2.30914
2006	10	24	2.36738
2006	10	25	2.16965
2006	10	26	2.09703
2006	10	27	2.67266
2006	10	28	2.63792
2006	10	29	1.55673
2006	10	30	1.35195
2006	10	31	1.88982
2007	4	1	2.67629
2007	4	2	2.34337
2007	4	3	3.13778
2007	4	4	3.18716
2007	4	5	2.36937
2007	4	6	2.76001
2007	4	7	3.22839
2007	4	8	3.54639
2007	4	9	3.42316
2007	4	10	3.09639
2007	4	11	3.44586
2007	4	12	2.79605
2007	4	13	3.47624
2007	4	14	3.33368
2007	4	15	1.88839
2007	4	16	2.89014
2007	4	17	2.1315
2007	4	18	3.3883
2007	4	19	3.8519
2007	4	20	3.35241
2007	4	21	3.42849
2007	4	22	3.68291
2007	4	23	4.03422
2007	4	24	5.00589
2007	4	25	3.62528
2007	4	26	3.23934
2007	4	27	4.63314
2007	4	28	3.6025
2007	4	29	2.74517
2007	4	30	3.70345
2007	5	1	3.62779
2007	5	2	3.78939
2007	5	3	4.49223
2007	5	4	4.88894
2007	5	5	4.32567
2007	5	6	4.93332
2007	5	7	5.40366
2007	5	8	4.27562
2007	5	9	2.62954
2007	5	10	2.35344
2007	5	11	1.51823
2007	5	12	2.14777
2007	5	13	2.94602
2007	5	14	3.76519
2007	5	15	4.2576
2007	5	16	4.16407
2007	5	17	2.3731
2007	5	18	1.96422
2007	5	19	4.38134
2007	5	20	5.25933
2007	5	21	3.81657
2007	5	22	4.30204
2007	5	23	4.22705
2007	5	24	4.53353
2007	5	25	4.83317
2007	5	26	4.1658
2007	5	27	4.35265
2007	5	28	4.35049
2007	5	29	3.69744
2007	5	30	4.97604
2007	5	31	4.2422
2007	6	1	4.31502
2007	6	2	3.76198
2007	6	3	4.34815
2007	6	4	3.77687
2007	6	5	4.49834
2007	6	6	4.34861
2007	6	7	5.4638
2007	6	8	4.1224
2007	6	9	2.81097
2007	6	10	3.65501
[truncated: 2,711 more rows]

## Sheet: ETo(-U) & Statistics
Year	Month	Day	ETo-missing-u	ETo-full data
#	#	#	mm/day	mm/day		RMSE, mm/day	MBE, mm/day	MAE, mm/day	RE	d
1998	4	1	3.16885	2.74032		0.37152	0.00949529	0.247697	0.0877371	0.974124
1998	4	2	2.2763	2.12095
1998	4	3	2.74608	2.7115
1998	4	4	3.49716	3.40971
1998	4	5	3.56905	2.97971
1998	4	6	3.50917	3.09217
1998	4	7	3.6958	3.00852
1998	4	8	3.64257	3.08144
1998	4	9	3.90394	3.24399
1998	4	10	4.14029	3.19565
1998	4	11	4.45481	3.6759
1998	4	12	4.52807	4.0979
1998	4	13	4.55026	3.99706
1998	4	14	4.44056	3.31898
1998	4	15	2.85848	2.1991
1998	4	16	4.99246	3.91926
1998	4	17	1.69527	1.72878
1998	4	18	3.76327	3.51869
1998	4	19	3.09633	3.01571
1998	4	20	3.06476	3.17907
1998	4	21	3.29434	3.42363
1998	4	22	3.06882	2.86054
1998	4	23	3.66843	3.23816
1998	4	24	3.90752	3.36769
1998	4	25	3.23696	2.52586
1998	4	26	1.41616	1.57045
1998	4	27	1.80682	1.81772
1998	4	28	2.79329	2.72374
1998	4	29	3.15514	2.79605
1998	4	30	3.41133	3.08039
1998	5	1	4.01903	3.62705
1998	5	2	4.34318	3.60159
1998	5	3	4.16513	3.29516
1998	5	4	4.71388	4.28883
1998	5	5	4.35167	4.21028
1998	5	6	4.05739	3.30881
1998	5	7	3.09849	2.38763
1998	5	8	4.33235	3.70605
1998	5	9	4.0784	3.57096
1998	5	10	2.98737	2.84752
1998	5	11	3.29395	3.23132
1998	5	12	3.57412	3.54937
1998	5	13	3.04223	3.00557
1998	5	14	2.70966	2.63219
1998	5	15	3.39239	3.30085
1998	5	16	3.92812	3.70953
1998	5	17	3.01471	2.63077
1998	5	18	2.02743	1.96566
1998	5	19	3.36749	3.31648
1998	5	20	2.62432	2.70039
1998	5	21	3.695	3.67976
1998	5	22	2.85349	2.83079
1998	5	23	3.08054	2.88726
1998	5	24	4.4429	3.94708
1998	5	25	4.76712	4.18654
1998	5	26	4.90627	3.88993
1998	5	27	4.84296	3.80194
1998	5	28	4.23254	4.03916
1998	5	29	4.362	4.30259
1998	5	30	3.97418	3.87223
1998	5	31	3.0015	2.85622
1998	6	1	4.19708	4.05917
1998	6	2	3.94736	3.77364
1998	6	3	3.93629	3.66492
1998	6	4	4.60184	4.34613
1998	6	5	5.51454	4.68956
1998	6	6	4.68428	4.37128
1998	6	7	4.35558	4.092
1998	6	8	4.50225	4.16576
1998	6	9	3.95991	3.65447
1998	6	10	4.38432	4.13359
1998	6	11	4.54482	4.3687
1998	6	12	3.51124	3.19814
1998	6	13	4.96589	4.70793
1998	6	14	5.03826	4.75514
1998	6	15	4.92775	4.75326
1998	6	16	4.66022	4.35097
1998	6	17	5.19665	4.60282
1998	6	18	4.4957	4.10278
1998	6	19	5.0536	4.57929
1998	6	20	3.45871	3.17543
1998	6	21	4.14883	3.95576
1998	6	22	4.41916	4.37528
1998	6	23	4.99538	4.71393
1998	6	24	5.37344	4.70857
1998	6	25	5.08789	4.7761
1998	6	26	4.96597	4.71793
1998	6	27	4.72854	4.43791
1998	6	28	5.33312	4.68043
1998	6	29	5.44436	4.78025
1998	6	30	5.42131	4.9225
1998	7	1	5.19179	4.88838
1998	7	2	5.25806	4.83581
1998	7	3	5.68528	5.23286
1998	7	4	5.31063	5.03514
1998	7	5	4.15791	4.16164
1998	7	6	3.43064	3.27821
1998	7	7	4.21311	4.07609
1998	7	8	4.53799	4.27676
1998	7	9	4.39342	4.24753
1998	7	10	5.07751	4.78799
1998	7	11	5.04972	4.79299
1998	7	12	5.20891	4.86931
1998	7	13	5.19649	4.86279
1998	7	14	5.17465	4.86661
1998	7	15	5.09156	4.76198
1998	7	16	4.41998	4.20147
1998	7	17	4.4018	4.16327
1998	7	18	4.62841	4.29616
1998	7	19	5.08939	4.65753
1998	7	20	4.85226	4.52982
1998	7	21	4.89985	4.41038
1998	7	22	5.04043	4.56028
1998	7	23	5.05218	4.59775
1998	7	24	3.72671	3.43404
1998	7	25	3.15051	2.8483
1998	7	26	3.87323	3.681
1998	7	27	4.23013	3.84385
1998	7	28	5.05126	4.50138
1998	7	29	4.80968	4.44112
1998	7	30	4.54915	4.18523
1998	7	31	4.3025	3.90703
1998	8	1	4.41669	3.98641
1998	8	2	4.6608	4.24335
1998	8	3	4.70668	4.21297
1998	8	4	4.68492	4.08808
1998	8	5	5.26484	4.29983
1998	8	6	5.49402	4.21813
1998	8	7	5.65928	4.10563
1998	8	8	5.71689	4.14009
1998	8	9	5.46222	4.09314
1998	8	10	4.97538	4.37034
1998	8	11	4.71055	4.1518
1998	8	12	4.83719	4.25506
1998	8	13	5.00964	4.23917
1998	8	14	4.92728	4.14241
1998	8	15	4.4112	3.98341
1998	8	16	5.16204	4.28676
1998	8	17	4.99921	3.8303
1998	8	18	4.90093	4.04083
1998	8	19	4.28314	4.03215
1998	8	20	4.44929	4.14786
1998	8	21	4.45934	4.12475
1998	8	22	4.30565	3.98336
1998	8	23	4.2951	3.89594
1998	8	24	4.31395	3.87157
1998	8	25	4.05391	3.61109
1998	8	26	3.82125	3.40043
1998	8	27	3.98136	3.49473
1998	8	28	3.67222	3.40567
1998	8	29	3.77955	3.38292
1998	8	30	3.58395	3.25851
1998	8	31	3.49641	3.18417
1998	9	1	3.91542	3.32426
1998	9	2	4.05669	3.53744
1998	9	3	4.16025	3.20326
1998	9	4	4.29227	2.94821
1998	9	5	3.83432	3.12055
1998	9	6	3.88184	3.2588
1998	9	7	3.70275	3.08034
1998	9	8	4.25853	3.02103
1998	9	9	4.21589	3.08539
1998	9	10	4.20809	3.12641
1998	9	11	3.92869	3.17911
1998	9	12	3.54555	2.9102
1998	9	13	2.9867	2.58751
1998	9	14	3.65545	3.07473
1998	9	15	3.30204	2.72175
1998	9	16	3.43754	2.96048
1998	9	17	3.44452	2.96109
1998	9	18	3.81178	3.00306
1998	9	19	3.14806	2.65451
1998	9	20	3.44081	2.8131
1998	9	21	3.47317	2.69085
1998	9	22	2.96156	2.44217
1998	9	23	2.34429	2.09179
1998	9	24	3.44233	2.54536
1998	9	25	3.7	2.67062
1998	9	26	3.72397	2.52097
1998	9	27	3.79123	2.51857
1998	9	28	3.98405	2.57165
1998	9	29	3.76299	2.65635
1998	9	30	3.2812	2.83603
1998	10	1	3.18326	3.21431
1998	10	2	3.07035	2.14163
1998	10	3	2.96483	2.08954
1998	10	4	2.94751	2.22411
1998	10	5	2.90421	2.25717
1998	10	6	2.79011	2.16295
1998	10	7	3.01046	2.10569
1998	10	8	3.22288	3.36281
1998	10	9	3.30705	4.92998
1998	10	10	3.40524	2.25836
1998	10	11	3.36015	1.86237
1998	10	12	3.40054	2.4295
1998	10	13	3.26693	3.43373
1998	10	14	3.14974	2.91891
1998	10	15	2.87925	2.38487
1998	10	16	2.35281	2.11101
1998	10	17	2.87125	2.70931
1998	10	18	2.82518	2.32329
1998	10	19	2.64676	1.80462
1998	10	20	2.69386	1.82445
1998	10	21	2.82567	1.91375
1998	10	22	2.90959	1.77961
1998	10	23	2.87632	1.92421
1998	10	24	2.96651	1.61982
1998	10	25	2.25915	1.94455
1998	10	26	2.13065	1.64281
1998	10	27	1.91429	1.52408
1998	10	28	1.03014	0.998312
1998	10	29	2.25843	2.27589
1998	10	30	2.19613	1.62723
1998	10	31	1.98482	1.61344
1999	4	1	2.89238	2.74429
1999	4	2	2.93072	2.93531
1999	4	3	2.08144	2.05916
1999	4	4	2.8601	2.82063
1999	4	5	2.93624	2.54663
1999	4	6	2.8951	3.00976
1999	4	7	1.45968	1.44237
1999	4	8	3.26043	3.13267
1999	4	9	3.22351	3.08318
1999	4	10	2.89983	2.7143
1999	4	11	3.20718	2.97943
1999	4	12	1.29463	1.29144
1999	4	13	3.29674	3.21721
1999	4	14	3.01502	3.00448
1999	4	15	3.82754	3.61892
1999	4	16	4.11028	3.81686
1999	4	17	3.83768	3.35977
1999	4	18	3.77462	3.19844
1999	4	19	3.75279	3.60617
1999	4	20	2.83975	2.79159
1999	4	21	3.05925	2.84647
1999	4	22	4.23529	4.09525
1999	4	23	4.30046	3.8604
1999	4	24	4.15482	3.41976
1999	4	25	4.94531	4.23201
1999	4	26	4.87975	4.17961
1999	4	27	4.48601	4.36974
1999	4	28	4.23433	3.98304
1999	4	29	3.68135	3.47763
1999	4	30	4.53858	4.14429
1999	5	1	4.79436	4.06634
1999	5	2	5.16379	4.37638
1999	5	3	4.77502	4.57585
1999	5	4	5.08987	4.63627
1999	5	5	5.29747	4.54521
1999	5	6	5.35981	4.72414
1999	5	7	3.58345	3.61626
1999	5	8	4.75365	4.57145
1999	5	9	3.94938	3.85949
1999	5	10	4.60632	4.39409
1999	5	11	4.87753	4.45045
1999	5	12	5.27105	4.44969
1999	5	13	4.33289	4.33985
1999	5	14	3.92826	3.88814
1999	5	15	4.46908	4.15395
1999	5	16	4.84723	4.54897
1999	5	17	4.51582	4.40331
1999	5	18	4.56707	4.22811
1999	5	19	5.16023	4.71097
1999	5	20	5.44189	6.94367
1999	5	21	5.31042	4.46551
1999	5	22	5.50514	4.44944
1999	5	23	5.45345	4.8167
1999	5	24	5.41359	5.13201
1999	5	25	4.93858	5.10375
1999	5	26	2.57711	2.57421
1999	5	27	5.24139	4.58211
1999	5	28	5.83533	4.7543
1999	5	29	4.72061	4.52086
1999	5	30	4.61947	4.62624
1999	5	31	5.02998	4.86613
1999	6	1	5.0647	4.87181
1999	6	2	5.3199	5.06725
1999	6	3	5.19495	5.13605
1999	6	4	5.01588	4.85821
1999	6	5	5.12279	5.10476
1999	6	6	4.85808	4.7682
1999	6	7	5.33337	5.21998
1999	6	8	5.1518	5.03481
1999	6	9	4.94409	4.84037
1999	6	10	4.99098	4.81498
1999	6	11	3.87536	3.71829
1999	6	12	4.96494	4.80763
1999	6	13	4.61029	4.58811
1999	6	14	3.12591	3.20425
1999	6	15	4.80403	4.5665
1999	6	16	5.28004	4.95011
1999	6	17	5.79079	5.41882
1999	6	18	5.72159	5.5327
1999	6	19	5.41463	5.27686
1999	6	20	5.59119	5.42484
1999	6	21	5.35097	5.17223
1999	6	22	4.8431	4.7595
1999	6	23	5.03227	5.12882
1999	6	24	4.71803	4.70103
1999	6	25	5.04083	5.04808
1999	6	26	4.52042	4.41492
1999	6	27	5.00472	4.63808
1999	6	28	5.02461	4.66811
1999	6	29	5.76436	5.56526
1999	6	30	5.65313	5.43392
1999	7	1	5.64471	5.48408
1999	7	2	4.80243	4.71909
1999	7	3	4.6647	4.6185
1999	7	4	5.26232	5.13198
1999	7	5	5.31669	5.18473
1999	7	6	5.46004	5.38275
1999	7	7	5.67616	5.52007
1999	7	8	4.92229	4.90379
1999	7	9	5.63727	5.50193
1999	7	10	5.91835	5.71504
1999	7	11	5.91215	5.78041
1999	7	12	6.04075	5.89731
1999	7	13	5.82201	5.62847
1999	7	14	5.69884	5.58003
1999	7	15	5.11079	4.99788
1999	7	16	4.06955	3.9637
1999	7	17	5.27646	4.89905
1999	7	18	5.09088	4.96996
1999	7	19	5.29817	5.15062
1999	7	20	5.6725	5.52974
1999	7	21	6.07902	5.76884
1999	7	22	6.17774	5.58686
1999	7	23	5.28297	5.14532
1999	7	24	5.71515	5.51501
1999	7	25	5.62213	5.49964
1999	7	26	4.36262	4.18713
1999	7	27	4.60397	4.39678
1999	7	28	4.9148	4.8573
1999	7	29	5.30992	5.10895
1999	7	30	4.63883	4.41928
1999	7	31	4.46621	4.23597
1999	8	1	4.86996	4.66775
1999	8	2	4.56781	4.37055
1999	8	3	4.64416	4.45862
1999	8	4	4.59321	4.42042
1999	8	5	4.6363	4.51388
1999	8	6	4.88168	4.62172
1999	8	7	5.3712	5.08391
1999	8	8	5.2133	4.93861
1999	8	9	4.81484	4.68245
1999	8	10	4.64993	4.3802
1999	8	11	4.76682	4.36222
1999	8	12	5.21151	4.94573
1999	8	13	5.28184	5.07655
1999	8	14	5.23129	4.98144
1999	8	15	4.51241	4.3247
1999	8	16	4.39875	4.16255
1999	8	17	4.53646	4.2336
1999	8	18	4.8403	4.35994
1999	8	19	5.64447	4.95661
1999	8	20	4.53097	4.28404
1999	8	21	4.20894	3.8248
1999	8	22	4.23763	3.97582
1999	8	23	3.785	3.48823
1999	8	24	4.42712	4.03244
1999	8	25	4.47621	4.32928
1999	8	26	5.28675	4.48733
1999	8	27	5.32907	4.5282
1999	8	28	5.35122	5.10568
1999	8	29	5.22649	4.53118
1999	8	30	5.26164	4.36339
1999	8	31	4.98607	4.66558
1999	9	1	4.38388	4.19153
1999	9	2	4.33476	3.95688
1999	9	3	4.69461	4.40916
1999	9	4	4.10649	3.83658
1999	9	5	4.2348	3.96049
1999	9	6	4.0056	3.65806
1999	9	7	4.28893	3.61916
1999	9	8	4.49866	3.93489
1999	9	9	3.89851	3.48499
1999	9	10	3.8437	3.4373
1999	9	11	4.0998	3.82892
1999	9	12	2.21091	2.21081
1999	9	13	3.47182	3.19168
1999	9	14	3.19633	3.03059
1999	9	15	3.07031	2.84909
1999	9	16	4.16519	3.50099
1999	9	17	4.29219	3.42056
1999	9	18	4.18947	3.32453
1999	9	19	3.9801	3.72573
1999	9	20	3.25828	3.07226
1999	9	21	3.7952	3.41931
1999	9	22	4.32894	3.41287
1999	9	23	4.37078	3.09536
1999	9	24	4.25099	3.15393
1999	9	25	3.82926	3.17268
1999	9	26	4.48544	3.42187
1999	9	27	4.50808	3.06821
1999	9	28	4.55132	3.03709
1999	9	29	4.56134	3.28872
1999	9	30	4.6584	4.16677
1999	10	1	3.59535	2.88109
1999	10	2	2.79257	2.62288
1999	10	3	2.90674	2.67829
1999	10	4	3.07185	2.64881
1999	10	5	3.20246	2.67231
1999	10	6	2.90891	2.4658
1999	10	7	2.59553	2.19778
1999	10	8	2.73912	2.35027
1999	10	9	1.83763	1.63327
1999	10	10	2.83642	2.34846
1999	10	11	2.28186	1.92525
1999	10	12	3.09429	3.23339
1999	10	13	3.11083	2.40093
1999	10	14	3.09894	2.09874
1999	10	15	2.58434	2.25406
1999	10	16	2.66562	2.328
1999	10	17	2.59058	2.21236
1999	10	18	2.35955	2.23611
1999	10	19	2.90212	2.16295
1999	10	20	2.60815	2.22651
1999	10	21	2.61197	2.16905
1999	10	22	2.66838	2.23718
1999	10	23	1.75958	1.45379
1999	10	24	2.51061	2.27819
1999	10	25	1.96505	1.56294
1999	10	26	3.08361	2.05384
1999	10	27	3.04222	1.71744
1999	10	28	2.49749	2.09963
1999	10	29	2.96315	2.30175
1999	10	30	2.91382	2.17241
1999	10	31	2.99068	3.76474
2000	4	1	3.63497	2.73968
2000	4	2	4.19652	4.30299
2000	4	3	3.09494	2.94107
2000	4	4	2.63324	2.49095
2000	4	5	2.50659	2.21264
2000	4	6	3.7108	3.34009
2000	4	7	3.34835	3.3978
2000	4	8	3.01516	3.07515
2000	4	9	1.73917	1.75199
2000	4	10	3.49516	3.21447
2000	4	11	2.51156	2.24428
2000	4	12	3.13601	3.09944
2000	4	13	2.82324	3.38433
2000	4	14	2.84729	2.88831
2000	4	15	2.99971	2.86629
2000	4	16	4.00183	3.46448
2000	4	17	4.40225	4.02944
2000	4	18	4.15824	4.52404
2000	4	19	2.79724	2.91399
2000	4	20	1.27195	1.28895
2000	4	21	2.25987	2.1727
2000	4	22	1.76854	1.72482
2000	4	23	2.60604	2.4681
2000	4	24	2.37642	2.27408
2000	4	25	3.17953	2.99893
2000	4	26	3.9921	3.73798
2000	4	27	4.62837	4.10551
2000	4	28	1.52272	1.38814
2000	4	29	2.35906	2.19522
2000	4	30	3.07838	2.84599
2000	5	1	4.38561	4.07173
2000	5	2	3.93737	3.51992
2000	5	3	3.98376	3.56468
2000	5	4	3.69641	3.70653
2000	5	5	2.05673	2.04949
2000	5	6	2.18118	2.13104
2000	5	7	3.61929	3.43816
2000	5	8	4.63806	4.17686
2000	5	9	4.78624	4.38754
2000	5	10	5.28488	4.37948
2000	5	11	5.17552	4.36966
2000	5	12	5.30972	4.37159
2000	5	13	4.89444	4.59678
2000	5	14	4.70102	4.41673
2000	5	15	4.01697	3.73612
2000	5	16	3.89574	3.63137
2000	5	17	2.42349	2.44684
2000	5	18	4.75898	4.39218
2000	5	19	4.27978	4.17496
2000	5	20	3.8575	3.62352
2000	5	21	4.36731	4.13689
2000	5	22	4.69371	4.41023
2000	5	23	3.61734	3.41057
2000	5	24	3.60711	3.38072
2000	5	25	4.38715	4.22418
2000	5	26	4.6401	4.11745
2000	5	27	5.33128	4.70512
2000	5	28	5.54557	4.93343
2000	5	29	5.25644	4.94506
2000	5	30	4.19261	3.86764
2000	5	31	5.14565	4.79328
2000	6	1	5.86625	5.16976
2000	6	2	5.56267	5.13763
2000	6	3	4.92571	4.75857
2000	6	4	4.78771	4.37111
2000	6	5	5.15068	4.83088
2000	6	6	5.21405	5.04519
2000	6	7	4.21283	4.11802
2000	6	8	5.07762	4.87823
2000	6	9	6.16242	5.68218
2000	6	10	3.19367	2.39974
2000	6	11	6.11748	5.38605
2000	6	12	6.03967	5.15584
2000	6	13	6.44369	6.49051
2000	6	14	6.61428	8.00331
2000	6	15	6.68469	6.46703
2000	6	16	6.36903	5.00005
2000	6	17	5.69648	4.96818
2000	6	18	5.15307	5.08707
2000	6	19	5.81476	5.7593
2000	6	20	5.81393	6.02753
2000	6	21	5.78487	4.98268
2000	6	22	5.95603	5.19022
2000	6	23	5.73634	5.23162
2000	6	24	5.76064	5.14083
2000	6	25	5.8617	5.49887
2000	6	26	5.58322	5.35083
2000	6	27	5.40478	5.19051
2000	6	28	4.96488	4.77148
2000	6	29	5.72676	5.47042
2000	6	30	5.70718	5.19975
2000	7	1	5.70178	5.21082
2000	7	2	5.6037	5.20686
2000	7	3	6.33175	5.62704
2000	7	4	6.30252	5.4032
2000	7	5	6.37224	5.42583
2000	7	6	5.98841	5.21942
2000	7	7	5.97369	5.35252
2000	7	8	6.23854	5.37314
2000	7	9	6.44234	5.44364
2000	7	10	5.42515	5.21695
2000	7	11	5.43827	5.18942
2000	7	12	5.97057	5.49089
2000	7	13	5.9154	5.49597
2000	7	14	4.70252	4.41606
2000	7	15	5.22459	4.99207
2000	7	16	5.4792	5.11253
2000	7	17	4.91588	4.56291
2000	7	18	4.76824	4.4702
2000	7	19	5.25659	4.91793
2000	7	20	5.17077	4.85706
2000	7	21	5.53358	4.99259
2000	7	22	5.58173	5.05333
2000	7	23	5.21338	4.77328
2000	7	24	5.45253	5.05377
2000	7	25	5.89969	5.14466
2000	7	26	5.81404	5.17206
2000	7	27	5.61267	5.12652
2000	7	28	5.68666	5.31539
2000	7	29	5.3767	4.73429
2000	7	30	5.57118	4.96481
2000	7	31	5.61745	5.19403
2000	8	1	5.52635	4.96485
2000	8	2	5.76577	5.40864
2000	8	3	5.79067	5.34695
2000	8	4	6.00556	5.92903
2000	8	5	5.55778	4.5018
2000	8	6	5.41399	4.6677
2000	8	7	5.27401	4.72231
2000	8	8	5.07919	4.67203
2000	8	9	5.05192	4.57779
2000	8	10	4.51343	4.06374
2000	8	11	4.54277	4.03314
2000	8	12	3.97749	3.56279
2000	8	13	4.32621	3.82692
2000	8	14	4.83465	4.4024
2000	8	15	5.75229	4.5289
2000	8	16	5.69707	4.49977
2000	8	17	5.18157	4.6453
2000	8	18	4.95801	4.51948
2000	8	19	4.4368	4.08643
2000	8	20	4.70135	4.26498
2000	8	21	4.97804	4.31716
2000	8	22	5.14026	4.238
2000	8	23	4.55476	4.15628
2000	8	24	3.78266	3.4213
2000	8	25	4.63171	4.14682
2000	8	26	3.79731	3.4461
2000	8	27	4.03038	3.53677
2000	8	28	5.19734	4.23003
2000	8	29	5.27413	4.03413
2000	8	30	4.97041	3.99477
2000	8	31	5.36314	4.42871
2000	9	1	4.72526	4.08638
2000	9	2	4.51763	4.16393
2000	9	3	3.78508	3.58876
2000	9	4	4.3209	4.02355
2000	9	5	4.43732	4.16469
2000	9	6	3.61281	3.55424
2000	9	7	4.16326	4.34013
2000	9	8	4.28894	3.89098
2000	9	9	4.28445	3.87097
2000	9	10	4.70328	4.0496
2000	9	11	4.42047	3.83821
2000	9	12	4.17407	3.99942
2000	9	13	3.83839	3.64368
2000	9	14	3.47056	3.38232
2000	9	15	3.82199	3.46296
2000	9	16	3.77624	3.42142
2000	9	17	3.45442	3.26846
2000	9	18	4.07466	3.60655
2000	9	19	4.33546	3.79975
2000	9	20	4.61315	3.8403
2000	9	21	4.59166	3.61951
2000	9	22	4.81415	5.11739
2000	9	23	4.50268	3.79524
2000	9	24	3.69577	3.50817
2000	9	25	3.53887	3.34495
2000	9	26	3.2612	3.06965
2000	9	27	3.7405	3.2229
2000	9	28	2.30953	2.20895
2000	9	29	2.21827	2.03451
2000	9	30	3.59201	3.21166
2000	10	1	3.33167	2.58738
2000	10	2	3.41359	2.94186
2000	10	3	3.45455	2.55043
2000	10	4	3.533	3.23137
2000	10	5	3.50733	3.31783
2000	10	6	3.42898	2.77961
2000	10	7	3.0731	2.79359
2000	10	8	2.48368	2.43763
2000	10	9	2.82312	2.74717
2000	10	10	1.55774	1.51194
2000	10	11	2.61577	2.44175
2000	10	12	2.7545	2.19843
2000	10	13	3.16323	2.89319
2000	10	14	3.24877	3.468
2000	10	15	3.12406	3.38268
2000	10	16	3.1357	2.60365
2000	10	17	2.89971	2.57686
2000	10	18	2.6514	2.58936
2000	10	19	2.77053	2.29272
2000	10	20	1.02661	0.930601
2000	10	21	2.57981	2.29461
2000	10	22	2.17561	1.89415
2000	10	23	2.39232	1.85284
2000	10	24	1.29649	1.30468
2000	10	25	1.87712	1.59209
2000	10	26	2.40437	1.87461
2000	10	27	2.45049	2.07709
2000	10	28	2.16981	1.95004
2000	10	29	1.12655	1.05567
2000	10	30	2.40211	2.26771
2000	10	31	2.62466	2.33413
2001	4	1	4.21793	4.46101
2001	4	2	1.71912	1.6958
2001	4	3	3.59446	3.47675
2001	4	4	3.33517	3.2574
2001	4	5	3.07177	2.95191
2001	4	6	2.69657	2.78482
2001	4	7	2.92549	2.96776
2001	4	8	3.97231	3.8918
2001	4	9	3.33278	3.31822
2001	4	10	2.88754	2.83829
2001	4	11	3.19745	3.2366
2001	4	12	3.88157	3.96323
2001	4	13	3.45586	3.36142
2001	4	14	1.91585	1.96264
2001	4	15	3.44708	3.45722
2001	4	16	3.12467	3.14691
2001	4	17	3.46822	3.50472
2001	4	18	3.65213	3.70887
2001	4	19	3.73706	3.89711
2001	4	20	4.17666	3.9823
2001	4	21	3.80486	3.36446
2001	4	22	3.3219	3.50126
2001	4	23	4.19998	4.5255
2001	4	24	4.10439	4.33928
2001	4	25	4.19952	4.33103
2001	4	26	3.79659	3.83245
2001	4	27	4.34769	4.22546
2001	4	28	4.74518	4.86903
2001	4	29	5.22101	5.56483
2001	4	30	5.22978	5.60161
2001	5	1	3.83647	4.43129
2001	5	2	5.33868	6.144
2001	5	3	3.91449	3.82617
2001	5	4	4.48007	4.49215
2001	5	5	4.78363	4.54459
2001	5	6	3.12714	3.04615
2001	5	7	3.83238	3.91936
2001	5	8	2.25097	2.24441
2001	5	9	2.05464	2.06196
2001	5	10	2.16249	2.01975
2001	5	11	1.94606	1.9682
2001	5	12	4.0685	4.03798
2001	5	13	3.54319	3.91107
2001	5	14	4.01701	4.24509
2001	5	15	3.14565	3.14528
2001	5	16	3.75393	3.73313
2001	5	17	5.02675	4.82024
2001	5	18	5.45551	5.15848
2001	5	19	5.56049	5.24794
2001	5	20	4.94854	4.73052
2001	5	21	5.76596	5.42606
2001	5	22	5.49951	5.04552
2001	5	23	5.65969	5.10573
2001	5	24	5.77035	5.99639
2001	5	25	5.67609	6.67583
2001	5	26	5.36506	4.96882
2001	5	27	5.5901	5.16007
2001	5	28	5.31138	5.07738
2001	5	29	5.59323	5.66953
2001	5	30	5.24694	5.25863
2001	5	31	5.42606	5.30772
2001	6	1	6.15148	5.59181
2001	6	2	6.11928	5.64575
2001	6	3	5.91895	5.76467
2001	6	4	5.3482	5.26427
2001	6	5	4.73465	4.8275
2001	6	6	4.86782	5.22663
2001	6	7	5.60324	5.49244
2001	6	8	5.2084	5.18366
2001	6	9	5.59062	5.50466
2001	6	10	6.17088	6.02251
2001	6	11	6.37087	6.06561
2001	6	12	6.41422	5.95407
2001	6	13	6.35858	5.84806
2001	6	14	6.21696	5.89648
2001	6	15	5.77726	5.83636
2001	6	16	4.27415	4.31944
2001	6	17	6.3163	6.91959
2001	6	18	5.88881	5.81187
2001	6	19	5.77887	5.75463
2001	6	20	5.70684	5.65404
2001	6	21	5.76624	5.73459
2001	6	22	5.86708	6.10709
2001	6	23	5.32937	5.30728
2001	6	24	5.677	5.63866
2001	6	25	5.50932	5.54935
2001	6	26	5.48671	5.49453
2001	6	27	4.85657	4.78015
2001	6	28	5.49298	5.43555
2001	6	29	6.09587	6.05242
2001	6	30	6.49299	6.22867
2001	7	1	5.33915	5.38833
2001	7	2	5.37078	5.42159
2001	7	3	5.07036	5.11683
2001	7	4	5.01748	5.0974
2001	7	5	4.99033	5.05726
2001	7	6	5.59411	5.72079
2001	7	7	5.22058	5.30945
2001	7	8	5.84347	5.89591
2001	7	9	6.41209	6.36804
2001	7	10	5.9151	5.88971
2001	7	11	5.72197	5.73157
2001	7	12	5.64455	5.65372
2001	7	13	4.94735	4.95756
2001	7	14	4.99154	5.02329
2001	7	15	4.54254	4.55002
2001	7	16	4.47464	4.48206
2001	7	17	5.27168	5.25309
2001	7	18	5.32125	5.3914
2001	7	19	5.06126	5.07135
2001	7	20	5.74044	5.65297
2001	7	21	5.77052	5.81372
2001	7	22	5.50685	5.38762
2001	7	23	5.81035	5.64344
2001	7	24	5.45822	5.39834
2001	7	25	5.20362	5.21436
2001	7	26	5.01376	5.02422
2001	7	27	5.06168	5.0006
2001	7	28	4.05213	3.94294
2001	7	29	4.34955	4.24374
2001	7	30	4.37012	4.3377
2001	7	31	4.17774	4.11314
2001	8	1	5.12678	5.20024
2001	8	2	4.94653	4.91945
2001	8	3	5.22809	5.12823
2001	8	4	4.48668	4.43011
2001	8	5	5.03967	5.07979
2001	8	6	4.69228	4.70145
2001	8	7	5.23351	5.12883
2001	8	8	4.84577	4.80051
2001	8	9	4.9934	4.89024
2001	8	10	5.58749	5.32482
2001	8	11	5.25477	5.19406
2001	8	12	4.6153	4.55816
2001	8	13	4.62815	4.56617
2001	8	14	5.11225	5.03396
2001	8	15	5.28447	5.12698
2001	8	16	4.94379	4.83303
2001	8	17	5.00225	5.05542
2001	8	18	4.24058	4.36459
2001	8	19	4.16678	4.06163
2001	8	20	4.89505	4.8656
2001	8	21	5.05637	4.94314
2001	8	22	5.31747	5.12019
2001	8	23	5.15009	5.03992
2001	8	24	5.22258	5.15174
2001	8	25	5.16759	5.06307
2001	8	26	4.88401	4.81599
2001	8	27	5.37729	5.115
2001	8	28	4.88818	4.8241
2001	8	29	4.83749	4.80778
2001	8	30	4.61304	4.6959
2001	8	31	4.73857	4.75357
2001	9	1	4.82639	4.47903
2001	9	2	4.87937	4.42924
2001	9	3	4.50542	4.38848
2001	9	4	4.27361	4.10853
2001	9	5	4.39306	4.40874
2001	9	6	4.18442	4.19897
2001	9	7	3.21811	3.22627
2001	9	8	4.13724	4.22871
2001	9	9	3.83744	3.81327
2001	9	10	4.40828	4.24178
2001	9	11	3.9447	3.70131
2001	9	12	4.0511	3.87476
2001	9	13	4.16069	4.01048
2001	9	14	3.90951	3.76844
2001	9	15	4.0876	4.00941
2001	9	16	4.14454	3.88635
2001	9	17	4.29456	3.97942
2001	9	18	4.21778	3.97065
2001	9	19	4.11944	3.93323
2001	9	20	4.30266	4.00407
2001	9	21	4.16943	3.85015
2001	9	22	4.19655	3.71384
2001	9	23	4.22382	3.72106
2001	9	24	4.10887	3.84246
2001	9	25	4.02934	3.74329
2001	9	26	3.7219	3.45832
2001	9	27	3.78871	3.64527
2001	9	28	3.90708	3.8273
2001	9	29	3.89071	3.90785
2001	9	30	3.93799	3.71615
2001	10	1	3.39116	2.99028
2001	10	2	3.4545	2.92933
2001	10	3	3.64167	2.81854
2001	10	4	3.58302	3.08717
2001	10	5	2.84532	2.75694
2001	10	6	3.15307	3.22805
2001	10	7	3.17971	2.99889
2001	10	8	3.61016	2.93042
2001	10	9	3.66098	4.35388
2001	10	10	3.17907	2.87194
2001	10	11	3.14338	2.7577
2001	10	12	3.22348	2.70728
2001	10	13	3.61034	2.36746
2001	10	14	2.72262	2.46397
2001	10	15	2.91872	2.62431
2001	10	16	2.90314	2.76616
2001	10	17	2.93134	2.54656
2001	10	18	3.0425	2.57795
2001	10	19	3.02682	2.95936
2001	10	20	3.02362	2.39935
2001	10	21	3.07319	2.59149
2001	10	22	2.8061	2.46627
2001	10	23	2.72047	2.67812
2001	10	24	2.62429	2.64184
2001	10	25	2.66279	3.03664
2001	10	26	2.87324	3.63422
2001	10	27	2.66961	2.85303
2001	10	28	1.50386	1.53496
2001	10	29	2.08856	1.81676
2001	10	30	2.32946	1.99102
2001	10	31	2.62523	1.96357
2002	4	1	1.25336	1.53546
2002	4	2	1.97447	1.98592
2002	4	3	3.38391	3.288
2002	4	4	1.67166	1.67658
2002	4	5	3.32634	3.33261
2002	4	6	1.90985	1.92789
2002	4	7	3.39382	3.30571
2002	4	8	2.91287	2.93949
2002	4	9	3.27008	3.31957
2002	4	10	3.9714	3.69638
2002	4	11	4.09341	3.96889
2002	4	12	3.80301	3.63671
2002	4	13	1.96017	1.81506
2002	4	14	3.60873	3.4274
2002	4	15	2.55317	2.47895
2002	4	16	2.05265	1.95728
2002	4	17	3.54381	3.62063
2002	4	18	2.90468	2.94741
2002	4	19	1.80321	1.79813
2002	4	20	2.76348	2.76972
2002	4	21	3.29225	3.18008
2002	4	22	2.13841	2.13044
2002	4	23	2.71338	2.70571
2002	4	24	2.19311	2.17836
2002	4	25	3.44199	3.3889
2002	4	26	3.33456	3.34027
2002	4	27	3.59011	3.44821
2002	4	28	4.00877	3.954
2002	4	29	3.55557	3.4884
2002	4	30	4.06762	3.95451
2002	5	1	4.36392	4.23509
2002	5	2	2.4806	2.3895
2002	5	3	3.77525	3.69969
2002	5	4	3.90715	3.88989
2002	5	5	3.71243	3.72093
2002	5	6	4.99169	4.81647
2002	5	7	4.44985	4.26487
2002	5	8	4.25949	4.14161
2002	5	9	4.87933	4.8285
2002	5	10	4.78031	4.58899
2002	5	11	4.63137	4.49398
2002	5	12	3.87414	3.81513
2002	5	13	3.93632	3.89265
2002	5	14	2.49053	2.45442
2002	5	15	3.00035	2.87881
2002	5	16	4.49486	4.40795
2002	5	17	4.75451	4.31658
2002	5	18	2.3111	2.4038
2002	5	19	4.09286	4.00557
2002	5	20	4.51889	4.48821
2002	5	21	4.21897	4.22899
2002	5	22	4.53477	4.51183
2002	5	23	3.21993	3.27202
2002	5	24	4.68199	4.61788
2002	5	25	4.98603	4.85464
2002	5	26	5.69319	5.32793
2002	5	27	4.56427	4.49287
2002	5	28	4.35608	4.39414
2002	5	29	4.07934	4.02274
2002	5	30	4.53741	4.58925
2002	5	31	4.48683	4.53689
2002	6	1	3.19356	3.18313
2002	6	2	4.81824	4.6623
2002	6	3	5.42384	5.20299
2002	6	4	4.72926	4.55623
2002	6	5	3.70123	3.67692
2002	6	6	4.96643	4.93375
2002	6	7	5.6725	5.37389
2002	6	8	5.84665	4.9303
2002	6	9	5.99413	5.49133
2002	6	10	6.14512	5.52072
2002	6	11	5.26726	5.47261
2002	6	12	4.59723	4.74747
2002	6	13	5.10425	5.02829
2002	6	14	5.61418	5.44521
2002	6	15	5.38397	5.3582
2002	6	16	4.7303	4.74165
2002	6	17	4.45692	4.54077
2002	6	18	5.04929	5.13659
2002	6	19	5.76699	6.75725
2002	6	20	5.70173	6.19138
2002	6	21	6.07408	7.51953
2002	6	22	5.53963	5.38212
2002	6	23	5.37984	5.39072
2002	6	24	5.32743	5.22538
2002	6	25	5.12714	5.10903
2002	6	26	3.94788	3.8961
2002	6	27	5.12582	5.03295
2002	6	28	4.68202	4.65925
2002	6	29	5.34479	5.35527
2002	6	30	5.71346	5.68488
2002	7	1	5.10352	5.04168
2002	7	2	4.7678	4.6613
2002	7	3	4.94722	4.84904
2002	7	4	5.62196	5.55604
2002	7	5	5.75137	5.72507
2002	7	6	5.70373	5.62484
2002	7	7	5.70467	5.6402
2002	7	8	4.90787	4.99157
2002	7	9	4.66017	4.70982
2002	7	10	5.07357	5.1667
2002	7	11	4.51066	4.52065
2002	7	12	4.61211	4.58957
2002	7	13	4.35231	4.25163
2002	7	14	4.45181	4.31455
2002	7	15	5.50521	5.35668
2002	7	16	5.67798	5.61327
2002	7	17	5.88014	5.8019
2002	7	18	5.8376	5.72462
2002	7	19	5.45681	5.43484
2002	7	20	5.64491	5.55924
2002	7	21	5.37164	5.23125
2002	7	22	5.05462	4.95703
2002	7	23	5.03035	5.03883
2002	7	24	6.12494	6.65979
2002	7	25	5.93203	5.95942
2002	7	26	5.31613	5.329
2002	7	27	5.17408	5.09231
2002	7	28	5.55595	5.45092
2002	7	29	5.9569	5.57728
2002	7	30	5.84405	5.59705
2002	7	31	5.95381	5.59529
2002	8	1	5.41739	5.33185
2002	8	2	5.26627	5.60477
2002	8	3	4.53459	4.50297
2002	8	4	4.74359	4.54122
2002	8	5	4.78653	4.76047
2002	8	6	4.9443	4.9582
2002	8	7	5.31006	5.18527
2002	8	8	4.65041	4.81974
2002	8	9	4.51886	4.60315
2002	8	10	5.09186	4.96406
2002	8	11	5.4621	5.34546
2002	8	12	5.89681	5.66269
2002	8	13	5.49039	5.40699
2002	8	14	4.72975	4.928
2002	8	15	4.65945	4.67316
2002	8	16	4.1359	4.17677
2002	8	17	4.12935	4.17924
2002	8	18	3.32648	3.31666
2002	8	19	4.57144	4.37036
2002	8	20	4.61212	4.5184
2002	8	21	4.32667	4.25968
2002	8	22	4.66314	4.55493
2002	8	23	5.07927	4.91813
2002	8	24	5.19061	4.97452
2002	8	25	5.09252	4.92916
2002	8	26	5.25708	5.00399
2002	8	27	5.34329	4.93154
2002	8	28	5.05928	4.71022
2002	8	29	4.79839	4.86456
2002	8	30	4.63938	4.56524
2002	8	31	4.22929	4.14941
2002	9	1	4.06228	3.97581
2002	9	2	4.31057	4.18005
2002	9	3	4.21205	4.14112
2002	9	4	4.07207	4.04602
2002	9	5	3.70913	3.54231
2002	9	6	3.97009	3.8464
2002	9	7	3.53025	3.40561
2002	9	8	3.82034	3.67758
2002	9	9	4.11622	4.03185
2002	9	10	3.53293	3.31849
2002	9	11	3.64168	3.59597
2002	9	12	3.22366	3.23729
2002	9	13	3.89288	3.75802
2002	9	14	3.85738	3.62782
2002	9	15	3.78234	3.68398
2002	9	16	4.00852	3.67305
2002	9	17	4.02685	3.78813
2002	9	18	3.85738	3.87318
2002	9	19	4.2906	4.32194
2002	9	20	4.19447	3.62614
2002	9	21	4.36374	3.9602
2002	9	22	4.47534	4.15627
2002	9	23	3.69602	3.49633
2002	9	24	3.49001	3.15119
2002	9	25	3.67821	3.41097
2002	9	26	3.50074	3.28084
2002	9	27	3.34003	3.14065
2002	9	28	3.50563	3.43173
2002	9	29	3.85134	3.39985
2002	9	30	4.19337	3.31849
2002	10	1	3.28487	2.78046
2002	10	2	2.05795	1.98066
2002	10	3	3.14234	3.08205
2002	10	4	3.19669	2.66046
2002	10	5	2.99407	2.65277
2002	10	6	3.16579	2.7363
2002	10	7	2.40454	1.96004
2002	10	8	2.77564	2.55881
2002	10	9	2.97741	2.55378
2002	10	10	3.34312	2.65602
2002	10	11	3.44886	2.66633
2002	10	12	3.52355	2.65359
2002	10	13	3.44076	2.7336
2002	10	14	2.05286	1.8316
2002	10	15	2.74139	2.66097
2002	10	16	2.2643	1.96396
2002	10	17	3.04835	2.13427
2002	10	18	3.13432	2.52691
2002	10	19	3.07781	2.46584
2002	10	20	2.47101	2.25592
2002	10	21	2.93969	3.81198
2002	10	22	2.87014	2.62094
2002	10	23	2.8864	2.24123
2002	10	24	3.08531	2.21084
2002	10	25	2.89989	2.08859
2002	10	26	2.84869	2.1744
2002	10	27	2.79761	2.27737
2002	10	28	2.86398	2.1909
2002	10	29	2.51693	2.22505
2002	10	30	2.85411	3.73411
2002	10	31	2.80344	2.22904
2003	4	1	3.30852	2.99259
2003	4	2	2.07778	2.35287
2003	4	3	2.81985	3.16313
2003	4	4	3.71528	3.73815
2003	4	5	3.67212	3.78239
2003	4	6	3.3421	3.84597
2003	4	7	2.99431	3.00331
2003	4	8	3.91628	3.72032
2003	4	9	3.32509	3.42812
2003	4	10	3.43024	3.31858
2003	4	11	4.12119	3.83932
2003	4	12	4.20331	3.83067
2003	4	13	3.75442	3.68871
2003	4	14	2.16894	2.08426
2003	4	15	1.49634	1.44931
2003	4	16	3.42431	3.32203
2003	4	17	2.11887	2.0137
2003	4	18	1.57244	1.63594
2003	4	19	3.07304	3.42779
2003	4	20	2.29495	2.31818
2003	4	21	2.57462	2.62057
2003	4	22	3.23948	3.13678
2003	4	23	2.17846	2.01448
2003	4	24	3.24026	3.51757
2003	4	25	0.991132	1.01636
2003	4	26	2.2072	2.18971
2003	4	27	3.83165	4.19685
2003	4	28	3.97141	3.8482
2003	4	29	2.95425	2.90478
2003	4	30	4.15781	3.78062
2003	5	1	4.94704	4.68524
2003	5	2	5.52826	5.67676
2003	5	3	5.86926	5.16127
2003	5	4	5.94907	5.39597
2003	5	5	5.70208	5.30736
2003	5	6	5.7215	5.34394
2003	5	7	5.65289	6.93122
2003	5	8	5.74499	6.50763
2003	5	9	5.90685	6.17696
2003	5	10	5.96953	5.87816
2003	5	11	6.00762	5.77667
2003	5	12	5.9102	5.30852
2003	5	13	5.98191	5.21726
2003	5	14	5.36254	5.46076
2003	5	15	4.3212	4.21416
2003	5	16	4.84926	4.72843
2003	5	17	5.28761	4.55348
2003	5	18	5.54955	5.21905
2003	5	19	5.44675	5.28778
2003	5	20	5.38571	5.15958
2003	5	21	4.71995	4.67023
2003	5	22	4.71601	4.72355
2003	5	23	5.06381	5.03451
2003	5	24	5.314	4.94353
2003	5	25	5.31958	5.46132
2003	5	26	4.74235	4.86623
2003	5	27	4.95696	4.89367
2003	5	28	4.008	3.98446
2003	5	29	3.40375	3.18624
2003	5	30	2.73786	2.95091
2003	5	31	2.3647	2.36862
2003	6	1	4.53325	4.49216
2003	6	2	3.93274	3.88288
2003	6	3	4.57782	4.43513
2003	6	4	5.08864	4.87725
2003	6	5	6.15073	6.17669
2003	6	6	6.24322	6.02311
2003	6	7	6.26705	5.67673
2003	6	8	3.25833	3.16381
2003	6	9	4.36917	4.3511
2003	6	10	4.14395	4.06771
2003	6	11	4.55786	4.54371
2003	6	12	4.29989	4.1812
2003	6	13	5.45967	5.24422
2003	6	14	5.71192	5.59882
2003	6	15	5.69541	5.63862
2003	6	16	5.52666	5.47385
2003	6	17	4.70714	4.68541
2003	6	18	5.56848	5.54025
2003	6	19	5.6881	5.59297
2003	6	20	5.14824	5.18259
2003	6	21	4.48268	4.5104
2003	6	22	4.40866	4.45969
2003	6	23	5.53731	5.42122
2003	6	24	5.86524	5.76902
2003	6	25	6.55762	6.11068
2003	6	26	5.70275	5.6294
2003	6	27	5.09227	5.07363
2003	6	28	4.76826	4.68692
2003	6	29	5.35315	5.29741
2003	6	30	5.66933	5.70774
2003	7	1	5.90092	5.91088
2003	7	2	5.62102	5.55066
2003	7	3	5.94582	5.72415
2003	7	4	5.80948	5.76501
2003	7	5	5.94978	5.92507
2003	7	6	4.03692	4.01945
2003	7	7	4.82132	4.77281
2003	7	8	5.36786	5.34512
2003	7	9	4.62264	4.69514
2003	7	10	5.36819	5.20797
2003	7	11	5.57594	5.51269
2003	7	12	5.52573	5.56036
2003	7	13	5.12632	5.25678
2003	7	14	4.83267	4.88398
2003	7	15	4.93658	4.94282
2003	7	16	5.30706	5.31529
2003	7	17	5.24463	5.25279
2003	7	18	5.46757	5.44032
2003	7	19	5.79157	5.80401
2003	7	20	5.73662	5.57669
2003	7	21	5.44703	5.27952
2003	7	22	5.66777	5.34253
2003	7	23	5.93014	5.48498
2003	7	24	5.81374	5.1952
2003	7	25	5.52782	5.05565
2003	7	26	5.72349	5.22715
2003	7	27	5.57525	5.00425
2003	7	28	5.39921	5.05534
2003	7	29	5.51074	4.92682
2003	7	30	5.5012	5.08994
2003	7	31	5.17117	4.83894
2003	8	1	5.31546	4.98453
2003	8	2	5.41521	4.93868
2003	8	3	5.15726	4.88334
2003	8	4	4.92786	4.57773
2003	8	5	4.42209	4.03817
2003	8	6	5.05631	4.49031
2003	8	7	5.6491	4.77938
2003	8	8	4.1548	3.82767
2003	8	9	4.82337	4.48239
2003	8	10	4.97609	4.60971
2003	8	11	5.19333	4.88063
2003	8	12	4.97244	4.38064
2003	8	13	5.35002	4.68503
2003	8	14	5.48612	4.66228
2003	8	15	5.49976	4.31138
2003	8	16	5.34877	4.29912
2003	8	17	5.36654	4.81289
2003	8	18	5.24814	4.66528
2003	8	19	5.29575	4.30523
2003	8	20	5.21718	4.74232
2003	8	21	4.58006	4.34389
2003	8	22	4.94633	4.53466
2003	8	23	5.283	4.62343
2003	8	24	5.11714	4.53009
2003	8	25	4.44047	4.05276
2003	8	26	4.62739	4.29932
2003	8	27	4.11702	3.79939
2003	8	28	4.29262	3.96663
2003	8	29	4.59634	4.16643
2003	8	30	4.79305	4.4036
2003	8	31	4.89128	4.53355
2003	9	1	4.54343	4.19789
2003	9	2	4.12554	3.78758
2003	9	3	4.14087	3.76332
2003	9	4	3.69395	3.41733
2003	9	5	3.22292	3.21656
2003	9	6	4.29932	4.15795
2003	9	7	4.3799	4.40854
2003	9	8	4.34897	3.71475
2003	9	9	3.89439	3.57583
2003	9	10	3.74809	3.33092
2003	9	11	3.13961	2.92158
2003	9	12	3.64092	3.48673
2003	9	13	3.42909	3.37991
2003	9	14	3.59889	3.3308
2003	9	15	3.27238	3.01699
2003	9	16	3.52993	3.12525
2003	9	17	2.91386	2.81931
2003	9	18	4.22173	4.25021
2003	9	19	4.28736	3.6508
2003	9	20	4.24673	3.94027
2003	9	21	4.35562	5.25383
2003	9	22	4.45073	4.60163
2003	9	23	4.52063	4.43024
2003	9	24	3.9226	3.34673
2003	9	25	3.39783	3.02496
2003	9	26	3.71689	3.22851
2003	9	27	3.53488	3.10891
2003	9	28	3.20783	2.81473
2003	9	29	3.43018	3.10143
2003	9	30	3.51673	3.22169
2003	10	1	2.32776	2.09192
2003	10	2	2.76458	2.34338
2003	10	3	3.14187	2.50199
2003	10	4	3.00091	2.72887
2003	10	5	3.13495	2.67452
2003	10	6	3.48931	2.56747
2003	10	7	3.33487	2.636
2003	10	8	2.53179	2.35601
2003	10	9	2.77439	2.14622
2003	10	10	2.95217	2.44195
2003	10	11	3.11349	2.66544
2003	10	12	3.09455	2.32684
2003	10	13	3.17032	2.20156
2003	10	14	3.22585	2.17391
2003	10	15	3.2991	2.51234
2003	10	16	2.87771	2.47779
2003	10	17	2.64077	2.25216
2003	10	18	2.51864	2.12833
2003	10	19	2.50416	2.16608
2003	10	20	2.17019	1.81148
2003	10	21	2.50593	2.07486
2003	10	22	2.67432	2.14656
2003	10	23	2.88693	2.21895
2003	10	24	1.70841	1.39588
2003	10	25	2.43139	2.11295
2003	10	26	2.07203	1.98092
2003	10	27	2.89952	2.83799
2003	10	28	2.23392	2.05671
2003	10	29	2.40019	2.87199
2003	10	30	2.21067	1.9119
2003	10	31	0.935323	0.901856
2004	4	1	3.85332	2.9297
2004	4	2	3.01495	3.37115
2004	4	3	3.91872	4.43566
2004	4	4	3.74016	4.83576
2004	4	5	3.65366	3.60639
2004	4	6	3.54512	2.5232
2004	4	7	3.72677	3.19949
2004	4	8	4.04495	3.03281
2004	4	9	4.388	3.00628
2004	4	10	4.56446	3.90843
2004	4	11	4.54415	3.96105
2004	4	12	4.53951	3.94319
2004	4	13	3.97914	3.58973
2004	4	14	3.41057	3.15324
2004	4	15	3.60825	3.65896
2004	4	16	3.69548	4.16895
2004	4	17	3.64042	3.51024
2004	4	18	1.69399	1.62017
2004	4	19	4.01236	3.67218
2004	4	20	2.99003	2.99138
2004	4	21	1.50127	1.3051
2004	4	22	3.35497	3.19388
2004	4	23	2.58204	2.56773
2004	4	24	3.08625	3.03731
2004	4	25	3.52546	3.24242
2004	4	26	4.41534	4.21538
2004	4	27	4.26857	5.29978
2004	4	28	4.17715	3.95551
2004	4	29	4.64426	4.41352
2004	4	30	2.81992	2.73672
2004	5	1	3.94442	3.7965
2004	5	2	3.43734	3.56917
2004	5	3	2.84961	2.84516
2004	5	4	3.40009	3.36377
2004	5	5	3.73297	3.64407
2004	5	6	4.24713	3.78425
2004	5	7	4.81195	4.60659
2004	5	8	3.10732	3.11332
2004	5	9	3.68566	3.59026
2004	5	10	5.13552	5.95142
2004	5	11	2.83688	3.025
2004	5	12	3.88254	3.88778
2004	5	13	4.13443	4.22465
2004	5	14	4.00368	3.97434
2004	5	15	3.19033	3.17949
2004	5	16	4.21034	3.98997
2004	5	17	2.8139	2.68841
2004	5	18	4.00041	4.22434
2004	5	19	3.76137	3.6808
2004	5	20	4.86917	4.7613
2004	5	21	5.01011	4.68892
2004	5	22	4.50904	4.37355
2004	5	23	4.32911	4.337
2004	5	24	4.57187	4.44895
2004	5	25	4.67845	4.4818
2004	5	26	4.64896	4.51651
2004	5	27	4.46929	4.40731
2004	5	28	4.77188	4.576
2004	5	29	4.302	4.25154
2004	5	30	4.67293	4.56051
2004	5	31	3.83059	3.61743
2004	6	1	4.09526	4.17014
2004	6	2	3.98669	3.94516
2004	6	3	4.31662	4.34686
2004	6	4	4.73669	4.60341
2004	6	5	5.18889	4.78592
2004	6	6	5.06449	4.89911
2004	6	7	5.09366	5.0586
2004	6	8	4.26657	4.3531
2004	6	9	4.96953	4.8826
2004	6	10	5.38959	5.19806
2004	6	11	5.37275	5.26073
2004	6	12	5.29646	5.1128
2004	6	13	5.2895	5.13054
2004	6	14	5.15742	5.06913
2004	6	15	5.27517	5.24307
2004	6	16	4.82311	4.85636
2004	6	17	4.83206	4.90701
2004	6	18	4.98775	4.92615
2004	6	19	4.38928	4.30464
2004	6	20	5.01686	5.12719
2004	6	21	4.60823	4.56553
2004	6	22	4.39527	4.31993
2004	6	23	4.19681	4.17248
2004	6	24	4.73276	4.64124
2004	6	25	4.62244	4.54733
2004	6	26	5.03811	4.95063
2004	6	27	5.34658	5.32793
2004	6	28	5.2232	5.23187
2004	6	29	5.96599	6.00069
2004	6	30	5.89692	5.38292
2004	7	1	5.44255	5.20188
2004	7	2	5.89985	5.57544
2004	7	3	5.43361	5.33506
2004	7	4	5.28876	5.26054
2004	7	5	5.67359	5.5344
2004	7	6	6.18101	5.75361
2004	7	7	5.81471	5.57937
2004	7	8	5.28066	5.21603
2004	7	9	4.35736	4.36678
2004	7	10	5.91455	5.6467
2004	7	11	5.70984	5.67838
2004	7	12	5.1714	5.1478
2004	7	13	5.26781	5.24597
2004	7	14	4.64089	4.61886
2004	7	15	5.31311	5.69289
2004	7	16	4.98992	4.85597
2004	7	17	5.64577	5.46293
2004	7	18	5.49229	5.34573
2004	7	19	5.69926	5.57853
2004	7	20	5.53731	5.36121
2004	7	21	5.00044	5.04865
2004	7	22	5.36512	5.28247
2004	7	23	5.49214	5.34559
2004	7	24	5.08826	4.98856
2004	7	25	4.80564	4.85871
2004	7	26	4.50712	4.37658
2004	7	27	4.25484	4.17411
2004	7	28	4.20818	4.09475
2004	7	29	4.8811	4.76613
2004	7	30	5.05821	4.88448
2004	7	31	4.76157	4.67656
2004	8	1	4.22361	4.19839
2004	8	2	4.63368	4.6071
2004	8	3	4.32546	4.2743
2004	8	4	4.59192	4.48312
2004	8	5	4.40571	4.26912
2004	8	6	4.36349	4.34
2004	8	7	4.1998	4.11036
2004	8	8	3.96176	3.97043
2004	8	9	4.43877	4.33918
2004	8	10	3.88292	3.83328
2004	8	11	3.74327	3.86332
2004	8	12	5.10532	4.99379
2004	8	13	5.24209	4.99371
2004	8	14	5.15222	4.98959
2004	8	15	4.51197	4.52236
2004	8	16	4.40464	4.37666
2004	8	17	4.40944	4.34923
2004	8	18	4.62418	4.54891
2004	8	19	4.53326	4.44587
2004	8	20	4.70754	4.60074
2004	8	21	4.55233	4.47626
2004	8	22	4.68039	4.61037
2004	8	23	4.3377	4.27766
2004	8	24	4.72625	4.56685
2004	8	25	5.10378	4.77129
2004	8	26	5.01661	4.8437
2004	8	27	4.85546	4.74284
2004	8	28	4.45029	4.37813
2004	8	29	4.21163	4.22415
2004	8	30	4.3322	4.21399
2004	8	31	4.10807	4.01077
2004	9	1	3.98144	3.80732
2004	9	2	3.90108	3.7648
2004	9	3	4.35701	4.1268
2004	9	4	4.2119	4.00992
2004	9	5	4.2185	4.03029
2004	9	6	4.51519	4.55292
2004	9	7	4.40391	4.08527
2004	9	8	4.42471	3.82541
2004	9	9	3.98263	4.05972
2004	9	10	3.80039	3.69105
2004	9	11	4.05213	4.49116
2004	9	12	4.32469	5.99708
2004	9	13	4.0777	3.71055
2004	9	14	4.12731	3.80109
2004	9	15	4.2791	3.7376
2004	9	16	3.8934	3.80884
2004	9	17	3.84518	3.6277
2004	9	18	4.29745	3.79081
2004	9	19	4.27547	3.54032
2004	9	20	4.32778	3.63537
2004	9	21	4.07071	3.62957
2004	9	22	3.4615	3.39737
2004	9	23	3.3566	3.22833
2004	9	24	3.87314	3.40301
2004	9	25	3.6293	3.38769
2004	9	26	3.71654	3.28832
2004	9	27	3.58417	3.26196
2004	9	28	3.80085	3.34264
2004	9	29	3.95195	3.38194
2004	9	30	3.50556	3.25503
2004	10	1	3.0106	2.85413
2004	10	2	3.12489	3.28062
2004	10	3	2.88184	2.49704
2004	10	4	3.22777	2.58601
2004	10	5	3.39267	3.55262
2004	10	6	2.61061	2.45916
2004	10	7	2.39502	2.11594
2004	10	8	2.75431	2.71597
2004	10	9	2.69642	2.50405
2004	10	10	2.81529	2.66027
2004	10	11	3.18058	2.66019
2004	10	12	3.3396	3.03876
2004	10	13	2.96068	2.57017
2004	10	14	2.91912	2.58091
2004	10	15	3.18462	2.55292
2004	10	16	3.09602	2.2935
2004	10	17	3.34589	2.49451
2004	10	18	3.29699	2.63693
2004	10	19	3.20404	2.59633
2004	10	20	2.66997	2.42976
2004	10	21	2.91444	2.76972
2004	10	22	2.75417	2.29695
2004	10	23	2.98256	2.41178
2004	10	24	3.03292	2.85332
2004	10	25	3.08895	3.22765
2004	10	26	3.16508	3.31578
2004	10	27	3.02391	3.49123
2004	10	28	3.01678	2.94075
2004	10	29	2.37536	2.73991
2004	10	30	2.40105	2.03899
2004	10	31	2.69817	2.49222
2005	4	1	3.10422	3.53152
2005	4	2	2.0668	2.18641
2005	4	3	1.68434	1.7393
2005	4	4	2.77999	2.60093
2005	4	5	3.51223	3.48102
2005	4	6	3.61095	3.74359
2005	4	7	3.90594	3.64914
2005	4	8	3.92099	4.78107
2005	4	9	4.12077	4.38098
2005	4	10	4.20534	3.8563
2005	4	11	4.68987	4.40107
2005	4	12	4.65212	4.10114
2005	4	13	4.58686	5.21614
2005	4	14	3.82415	3.97971
2005	4	15	3.28572	3.38203
2005	4	16	2.70723	2.7218
2005	4	17	3.15154	2.98636
2005	4	18	1.76606	1.74854
2005	4	19	3.10399	3.28977
2005	4	20	3.14975	3.35396
2005	4	21	3.94203	3.63706
2005	4	22	1.50646	1.57898
2005	4	23	3.33474	3.30563
2005	4	24	4.15679	4.17024
2005	4	25	3.87364	3.85272
2005	4	26	3.89356	3.83784
2005	4	27	3.41683	3.42226
2005	4	28	3.78158	3.69732
2005	4	29	3.79336	3.53528
2005	4	30	2.53965	2.55861
2005	5	1	2.82605	2.8128
2005	5	2	4.04822	3.73506
2005	5	3	4.25595	4.1671
2005	5	4	3.75225	4.14827
2005	5	5	4.4601	4.29405
2005	5	6	2.11846	2.09436
2005	5	7	4.16871	3.83754
2005	5	8	3.57949	3.45264
2005	5	9	3.62223	3.68054
2005	5	10	4.59279	4.39703
2005	5	11	5.30016	4.77312
2005	5	12	5.32334	4.68206
2005	5	13	3.42776	3.39873
2005	5	14	5.03956	4.77669
2005	5	15	4.9123	4.72993
2005	5	16	3.66075	3.56301
2005	5	17	4.97067	4.65547
2005	5	18	5.57596	5.10538
2005	5	19	5.30643	5.08936
2005	5	20	5.20642	4.88349
2005	5	21	4.52339	4.26696
2005	5	22	4.85637	4.8262
2005	5	23	4.24996	4.28684
2005	5	24	4.24075	4.17917
2005	5	25	3.92234	3.90351
2005	5	26	4.2248	4.17682
2005	5	27	4.7237	5.07035
2005	5	28	3.97792	4.04735
2005	5	29	3.07175	3.10672
2005	5	30	2.76781	2.76038
2005	5	31	2.65366	2.67948
2005	6	1	2.47804	2.36364
2005	6	2	4.04718	3.93141
2005	6	3	4.4823	4.27551
2005	6	4	4.45316	4.30083
2005	6	5	4.8949	4.86901
2005	6	6	4.71615	4.76881
2005	6	7	5.36	5.08581
2005	6	8	5.19689	5.17476
2005	6	9	4.80061	4.77693
2005	6	10	3.02861	2.97982
2005	6	11	4.05175	4.05965
2005	6	12	4.19295	4.28914
2005	6	13	4.55927	4.54264
2005	6	14	5.26836	5.12276
2005	6	15	4.26171	4.24302
2005	6	16	5.10546	5.02778
2005	6	17	5.47015	5.41218
2005	6	18	5.15361	5.10717
2005	6	19	4.55505	4.6277
2005	6	20	4.56228	4.65255
2005	6	21	3.92255	3.95462
2005	6	22	5.11372	5.16341
2005	6	23	5.73542	5.87348
2005	6	24	5.57647	5.37508
2005	6	25	5.19879	5.20871
2005	6	26	5.35307	5.39897
2005	6	27	5.62986	5.59125
2005	6	28	5.38905	5.36748
2005	6	29	4.88828	4.93239
2005	6	30	4.38973	4.49837
2005	7	1	4.97608	5.02707
2005	7	2	4.44192	4.44972
2005	7	3	4.26514	4.37349
2005	7	4	4.73766	4.90506
2005	7	5	4.26161	4.31745
2005	7	6	4.78495	4.79511
2005	7	7	4.71086	4.74117
2005	7	8	4.92091	4.90545
2005	7	9	5.13442	5.11431
2005	7	10	4.96217	4.99024
2005	7	11	5.11857	5.1262
2005	7	12	5.2396	5.22272
2005	7	13	4.91236	4.94527
2005	7	14	4.08696	4.19603
2005	7	15	4.57674	4.70121
2005	7	16	4.64654	4.76058
2005	7	17	5.44829	5.30206
2005	7	18	5.30566	5.28395
2005	7	19	5.45346	5.43091
2005	7	20	5.54815	5.4627
2005	7	21	5.42629	5.37314
2005	7	22	4.92015	4.92728
2005	7	23	4.56	4.6205
2005	7	24	4.49915	4.56665
2005	7	25	4.42615	4.43228
2005	7	26	4.64207	4.62655
2005	7	27	5.09711	5.10427
2005	7	28	4.878	4.85798
2005	7	29	4.77663	4.75519
2005	7	30	3.96868	3.99932
2005	7	31	3.56381	3.67164
2005	8	1	4.2062	4.24391
2005	8	2	3.74728	3.76002
2005	8	3	5.04858	4.92082
2005	8	4	5.19882	5.04883
2005	8	5	4.57498	4.52673
2005	8	6	4.79111	4.85738
2005	8	7	4.92466	5.03531
2005	8	8	4.6677	4.72425
2005	8	9	4.79046	4.77167
2005	8	10	4.41419	4.42151
2005	8	11	4.68055	4.65816
2005	8	12	4.96182	4.88635
2005	8	13	4.97722	4.94557
2005	8	14	5.11012	5.08021
2005	8	15	4.9173	4.88985
2005	8	16	4.63217	4.64022
2005	8	17	4.4783	4.45092
2005	8	18	4.75996	4.77194
2005	8	19	4.637	4.6122
2005	8	20	4.12556	4.10392
2005	8	21	4.37821	4.31343
2005	8	22	4.95564	4.75291
2005	8	23	4.79421	4.77057
2005	8	24	4.35403	4.36268
2005	8	25	4.41868	4.43033
2005	8	26	4.3939	4.35501
2005	8	27	4.6209	4.67585
2005	8	28	4.40562	4.41605
2005	8	29	4.62796	4.51598
2005	8	30	5.06413	4.81843
2005	8	31	5.18864	5.43926
2005	9	1	4.34925	4.41663
2005	9	2	3.75952	3.77097
2005	9	3	3.38245	3.3926
2005	9	4	3.85637	3.43963
2005	9	5	4.4931	4.84138
2005	9	6	4.37291	4.40752
2005	9	7	4.20384	3.98525
2005	9	8	4.13384	3.98128
2005	9	9	4.37745	3.79568
2005	9	10	3.99436	3.86025
2005	9	11	4.00016	3.84487
2005	9	12	4.06291	3.94197
2005	9	13	4.26925	3.9845
2005	9	14	3.9972	3.76303
2005	9	15	3.65429	3.6269
2005	9	16	3.66522	3.42015
2005	9	17	3.47435	3.35183
2005	9	18	3.66237	3.42521
2005	9	19	3.7645	3.68431
2005	9	20	3.62543	3.52472
2005	9	21	3.5277	3.44834
2005	9	22	3.75154	3.76797
2005	9	23	3.46203	3.3968
2005	9	24	3.29449	3.26155
2005	9	25	3.24675	3.40224
2005	9	26	3.50512	3.33959
2005	9	27	3.56854	3.34034
2005	9	28	2.87144	2.71393
2005	9	29	2.12389	2.00378
2005	9	30	3.43507	3.12147
2005	10	1	3.04592	2.79708
2005	10	2	2.78143	2.50998
2005	10	3	2.69517	2.55539
2005	10	4	3.26257	2.72305
2005	10	5	3.35641	3.27036
2005	10	6	3.26516	2.51647
2005	10	7	3.21972	2.50286
2005	10	8	3.30115	2.8312
2005	10	9	3.17041	2.2592
2005	10	10	3.32135	2.73184
2005	10	11	2.65028	2.11775
2005	10	12	2.72981	2.54992
2005	10	13	3.15084	2.26006
2005	10	14	2.80922	2.5413
2005	10	15	2.64839	2.44921
2005	10	16	1.72072	1.70925
2005	10	17	2.41906	2.39205
2005	10	18	1.76379	1.65467
2005	10	19	1.5643	1.54898
2005	10	20	2.38927	2.5214
2005	10	21	2.56037	2.17633
2005	10	22	2.76369	2.69797
2005	10	23	2.86653	2.69943
2005	10	24	2.94917	2.53864
2005	10	25	2.9506	2.46983
2005	10	26	3.05086	2.27687
2005	10	27	2.87979	2.21363
2005	10	28	2.45547	2.04464
2005	10	29	1.79478	2.31135
2005	10	30	2.39735	3.30167
2005	10	31	2.12464	1.90645
2006	4	1	2.63747	2.75636
2006	4	2	1.29701	1.30021
2006	4	3	3.52874	3.22873
2006	4	4	2.76541	2.81344
2006	4	5	2.13663	2.15708
2006	4	6	2.99087	2.85948
2006	4	7	1.41115	1.31132
2006	4	8	2.64649	2.40407
2006	4	9	3.87822	4.31795
2006	4	10	2.80753	2.75191
2006	4	11	2.93149	2.80484
2006	4	12	1.61417	1.54354
2006	4	13	1.90529	1.74568
2006	4	14	3.31813	3.2609
2006	4	15	2.82015	3.42227
2006	4	16	2.96634	2.95427
2006	4	17	2.11404	2.1686
2006	4	18	2.07389	2.02123
2006	4	19	3.4917	3.23245
2006	4	20	2.49903	2.08584
2006	4	21	2.71749	2.686
2006	4	22	2.79675	2.63664
2006	4	23	4.12853	4.43176
2006	4	24	1.70629	1.69509
2006	4	25	3.92605	4.48065
2006	4	26	4.21963	5.12457
2006	4	27	3.78584	3.73464
2006	4	28	2.94072	2.71432
2006	4	29	3.96616	4.46582
2006	4	30	3.05179	3.19683
2006	5	1	3.59527	3.65864
2006	5	2	3.38414	3.3341
2006	5	3	3.74153	3.59908
2006	5	4	4.25165	4.05389
2006	5	5	3.76747	3.74217
2006	5	6	3.98029	3.91591
2006	5	7	4.40497	4.27744
2006	5	8	4.18612	4.41856
2006	5	9	3.99594	4.01009
2006	5	10	3.94634	3.82659
2006	5	11	4.03659	3.93051
2006	5	12	4.65893	4.3841
2006	5	13	4.24221	4.14507
2006	5	14	4.86457	4.63984
2006	5	15	4.98479	4.82275
2006	5	16	4.02024	4.06377
2006	5	17	1.96101	1.95859
2006	5	18	3.82643	3.715
2006	5	19	4.54087	4.27776
2006	5	20	4.52032	4.4277
2006	5	21	3.8918	3.8992
2006	5	22	4.26004	4.12418
2006	5	23	4.42563	4.2883
2006	5	24	5.62476	5.14722
2006	5	25	5.63761	5.26407
2006	5	26	5.12751	5.09749
2006	5	27	4.55232	4.64269
2006	5	28	4.53574	4.54611
2006	5	29	5.10016	4.70326
2006	5	30	4.96813	4.71553
2006	5	31	5.2521	5.12061
2006	6	1	4.211	4.18723
2006	6	2	4.66787	4.57206
2006	6	3	4.8299	4.58931
2006	6	4	4.9618	4.76791
2006	6	5	4.79037	4.66345
2006	6	6	4.76104	4.88012
2006	6	7	4.53302	4.6472
2006	6	8	4.43211	4.539
2006	6	9	4.75955	4.87548
2006	6	10	4.9028	4.79764
2006	6	11	4.64819	4.72279
2006	6	12	4.87167	4.77337
2006	6	13	4.17409	4.24388
2006	6	14	4.31516	4.38993
2006	6	15	4.82001	4.73192
2006	6	16	4.62684	4.57301
2006	6	17	4.94391	4.78335
2006	6	18	5.17305	5.13708
2006	6	19	5.41527	5.14249
2006	6	20	5.17991	5.04497
2006	6	21	4.99195	5.00706
2006	6	22	4.53804	4.47936
2006	6	23	4.12933	4.19186
2006	6	24	4.60076	4.58157
2006	6	25	4.4164	4.37191
2006	6	26	4.52717	4.53283
2006	6	27	4.02134	4.06517
2006	6	28	4.42389	4.48126
2006	6	29	3.29613	3.29135
2006	6	30	4.56834	4.43993
2006	7	1	4.88233	4.88943
2006	7	2	4.8265	4.86667
2006	7	3	4.18805	4.27635
2006	7	4	4.07653	4.12296
2006	7	5	4.06198	4.04286
2006	7	6	4.57378	4.52825
2006	7	7	4.86018	4.64129
2006	7	8	5.12946	5.0027
2006	7	9	4.96178	4.89278
2006	7	10	4.7346	4.71649
2006	7	11	4.58452	4.56961
2006	7	12	4.93921	4.94785
2006	7	13	3.94957	4.02385
2006	7	14	3.7329	3.78516
2006	7	15	4.41811	4.39966
2006	7	16	4.79521	4.7519
2006	7	17	4.70245	4.7087
2006	7	18	4.95698	4.9382
2006	7	19	5.06458	5.04274
2006	7	20	5.19747	5.23547
2006	7	21	4.81722	4.89071
2006	7	22	4.66458	4.68969
2006	7	23	4.49028	4.49569
2006	7	24	4.59211	4.55306
2006	7	25	4.85502	4.76202
2006	7	26	4.60692	4.59293
2006	7	27	4.57993	4.58788
2006	7	28	4.63485	4.70448
2006	7	29	5.10826	5.17081
2006	7	30	5.0726	5.13462
2006	7	31	4.77986	4.75746
2006	8	1	3.66365	3.70155
2006	8	2	4.36138	4.34451
2006	8	3	4.59748	4.52237
2006	8	4	4.44855	4.34809
2006	8	5	4.06244	4.0246
2006	8	6	4.65892	4.63425
2006	8	7	3.86186	3.89184
2006	8	8	4.09795	4.12569
2006	8	9	4.25089	4.22441
2006	8	10	4.53831	4.46025
2006	8	11	4.28829	4.27274
2006	8	12	4.48233	4.43756
2006	8	13	4.19533	4.17695
2006	8	14	4.36778	4.37501
2006	8	15	4.53015	4.42898
2006	8	16	4.54692	4.42331
2006	8	17	4.26013	4.10358
2006	8	18	4.67384	4.50104
2006	8	19	4.39432	4.34792
2006	8	20	5.10581	4.82157
2006	8	21	4.86428	4.71776
2006	8	22	4.70152	4.63438
2006	8	23	4.66441	4.5866
2006	8	24	4.52362	4.40482
2006	8	25	4.45651	4.1965
2006	8	26	4.19277	4.1408
2006	8	27	4.10208	4.07479
2006	8	28	3.80095	3.77646
2006	8	29	3.96648	4.04853
2006	8	30	4.55801	4.41592
2006	8	31	4.06928	4.00916
2006	9	1	4.06418	4.02728
2006	9	2	3.66524	3.56987
2006	9	3	3.97166	3.88211
2006	9	4	4.17855	4.03276
2006	9	5	4.5987	4.43215
2006	9	6	4.25057	4.09067
2006	9	7	4.52044	4.55303
2006	9	8	4.19599	4.01186
2006	9	9	4.09664	3.90415
2006	9	10	4.41851	3.75003
2006	9	11	3.6999	3.6737
2006	9	12	4.09537	3.82066
2006	9	13	4.38462	4.22516
2006	9	14	4.10458	3.72833
2006	9	15	4.20187	3.67658
2006	9	16	4.22449	3.70807
2006	9	17	4.42535	3.87539
2006	9	18	4.32215	3.63578
2006	9	19	3.73306	3.42965
2006	9	20	3.62676	3.59311
2006	9	21	3.27306	3.37526
2006	9	22	2.48578	2.488
2006	9	23	2.77125	2.62585
2006	9	24	3.45628	3.42699
2006	9	25	1.76851	1.7188
2006	9	26	3.39865	3.01052
2006	9	27	3.61206	3.36888
2006	9	28	3.40368	3.02835
2006	9	29	1.92312	1.81639
2006	9	30	3.39568	3.49886
2006	10	1	2.34489	2.25355
2006	10	2	2.97634	2.71782
2006	10	3	3.07424	2.80439
2006	10	4	3.18079	2.67124
2006	10	5	3.17317	2.79674
2006	10	6	3.24052	2.59554
2006	10	7	3.13258	2.57476
2006	10	8	2.75275	2.47708
2006	10	9	2.71716	2.51622
2006	10	10	2.67539	2.34815
2006	10	11	2.97965	2.40451
2006	10	12	2.55956	2.43372
2006	10	13	2.54234	2.36718
2006	10	14	2.3294	2.0704
2006	10	15	1.8653	1.89906
2006	10	16	2.56563	2.31234
2006	10	17	1.52533	1.4479
2006	10	18	2.67294	2.69053
2006	10	19	2.84674	2.79183
2006	10	20	1.67518	1.63213
2006	10	21	2.51205	2.19557
2006	10	22	2.43304	2.07583
2006	10	23	2.96339	2.30914
2006	10	24	2.68368	2.36738
2006	10	25	2.48124	2.16965
2006	10	26	2.42753	2.09703
2006	10	27	2.24732	2.67266
2006	10	28	2.20749	2.63792
2006	10	29	1.65832	1.55673
2006	10	30	1.4157	1.35195
2006	10	31	1.80456	1.88982
2007	4	1	2.66911	2.67629
2007	4	2	2.54773	2.34337
2007	4	3	3.20475	3.13778
2007	4	4	3.11419	3.18716
2007	4	5	2.39287	2.36937
2007	4	6	2.6396	2.76001
2007	4	7	3.38423	3.22839
2007	4	8	3.69373	3.54639
2007	4	9	3.39016	3.42316
2007	4	10	3.16045	3.09639
2007	4	11	3.52708	3.44586
2007	4	12	2.92065	2.79605
2007	4	13	3.61731	3.47624
2007	4	14	3.4584	3.33368
2007	4	15	1.97355	1.88839
2007	4	16	3.07296	2.89014
2007	4	17	2.43227	2.1315
2007	4	18	3.20734	3.3883
2007	4	19	3.51299	3.8519
2007	4	20	3.22065	3.35241
2007	4	21	3.62992	3.42849
2007	4	22	3.8565	3.68291
2007	4	23	3.94993	4.03422
2007	4	24	3.94115	5.00589
2007	4	25	3.90329	3.62528
2007	4	26	3.21966	3.23934
2007	4	27	4.20933	4.63314
2007	4	28	3.94586	3.6025
2007	4	29	2.8197	2.74517
2007	4	30	3.64245	3.70345
2007	5	1	3.75128	3.62779
2007	5	2	4.01942	3.78939
2007	5	3	4.70256	4.49223
2007	5	4	4.73522	4.88894
2007	5	5	4.52747	4.32567
2007	5	6	5.19708	4.93332
2007	5	7	5.06596	5.40366
2007	5	8	4.5251	4.27562
2007	5	9	2.62123	2.62954
2007	5	10	2.66712	2.35344
2007	5	11	1.59297	1.51823
2007	5	12	2.11678	2.14777
2007	5	13	3.02509	2.94602
2007	5	14	3.80031	3.76519
2007	5	15	4.52009	4.2576
2007	5	16	4.14774	4.16407
2007	5	17	2.4308	2.3731
2007	5	18	1.99617	1.96422
2007	5	19	4.6367	4.38134
2007	5	20	4.89593	5.25933
2007	5	21	3.80802	3.81657
2007	5	22	4.51509	4.30204
2007	5	23	4.25148	4.22705
2007	5	24	4.76888	4.53353
2007	5	25	5.08709	4.83317
2007	5	26	4.21565	4.1658
2007	5	27	4.44292	4.35265
2007	5	28	4.27334	4.35049
2007	5	29	3.94703	3.69744
2007	5	30	5.12954	4.97604
2007	5	31	4.14306	4.2422
2007	6	1	4.30695	4.31502
2007	6	2	3.89148	3.76198
2007	6	3	4.42469	4.34815
2007	6	4	3.88233	3.77687
2007	6	5	4.6282	4.49834
2007	6	6	4.49184	4.34861
2007	6	7	5.37314	5.4638
2007	6	8	4.18338	4.1224
2007	6	9	2.82293	2.81097
2007	6	10	3.98148	3.65501
2007	6	11	3.95723	4.10636
[truncated: 2,711 more rows]

## Sheet: ETo(-ea) & Statistics
Year	Month	Day	ETo-missing-ea	ETo-full data
#	#	#	mm/day	mm/day		RMSE, mm/day	MBE, mm/day	MAE, mm/day	RE	d
1998	4	1	2.74078	2.74032		0.563584	0.232399	0.420925	0.133094	0.95
1998	4	2	2.37914	2.12095
1998	4	3	3.03026	2.7115
1998	4	4	3.4749	3.40971
1998	4	5	2.89645	2.97971
1998	4	6	3.00301	3.09217
1998	4	7	2.83989	3.00852
1998	4	8	2.9441	3.08144
1998	4	9	3.04624	3.24399
1998	4	10	2.8871	3.19565
1998	4	11	3.39974	3.6759
1998	4	12	4.00588	4.0979
1998	4	13	3.86481	3.99706
1998	4	14	2.88874	3.31898
1998	4	15	2.26996	2.1991
1998	4	16	3.29415	3.91926
1998	4	17	3.04575	1.72878
1998	4	18	3.58528	3.51869
1998	4	19	3.40022	3.01571
1998	4	20	3.74072	3.17907
1998	4	21	3.62813	3.42363
1998	4	22	2.91483	2.86054
1998	4	23	3.23746	3.23816
1998	4	24	3.36381	3.36769
1998	4	25	2.48025	2.52586
1998	4	26	3.44545	1.57045
1998	4	27	2.17901	1.81772
1998	4	28	2.79481	2.72374
1998	4	29	2.67072	2.79605
1998	4	30	2.9562	3.08039
1998	5	1	3.41811	3.62705
1998	5	2	3.52747	3.60159
1998	5	3	3.20334	3.29516
1998	5	4	4.27881	4.28883
1998	5	5	4.43809	4.21028
1998	5	6	3.16114	3.30881
1998	5	7	2.3939	2.38763
1998	5	8	3.62059	3.70605
1998	5	9	3.6896	3.57096
1998	5	10	3.53439	2.84752
1998	5	11	3.67752	3.23132
1998	5	12	3.87843	3.54937
1998	5	13	3.48548	3.00557
1998	5	14	2.89916	2.63219
1998	5	15	3.49789	3.30085
1998	5	16	3.56952	3.70953
1998	5	17	2.67459	2.63077
1998	5	18	2.90211	1.96566
1998	5	19	3.82381	3.31648
1998	5	20	3.82642	2.70039
1998	5	21	4.10701	3.67976
1998	5	22	3.48221	2.83079
1998	5	23	2.77019	2.88726
1998	5	24	3.56428	3.94708
1998	5	25	3.76276	4.18654
1998	5	26	3.42511	3.88993
1998	5	27	3.43758	3.80194
1998	5	28	4.22538	4.03916
1998	5	29	4.4362	4.30259
1998	5	30	4.04765	3.87223
1998	5	31	3.05197	2.85622
1998	6	1	3.93289	4.05917
1998	6	2	3.72461	3.77364
1998	6	3	3.45478	3.66492
1998	6	4	4.22588	4.34613
1998	6	5	4.37544	4.68956
1998	6	6	4.03524	4.37128
1998	6	7	3.93037	4.092
1998	6	8	3.64067	4.16576
1998	6	9	3.40952	3.65447
1998	6	10	3.7143	4.13359
1998	6	11	3.71276	4.3687
1998	6	12	2.98506	3.19814
1998	6	13	4.01625	4.70793
1998	6	14	4.33216	4.75514
1998	6	15	4.43873	4.75326
1998	6	16	3.79311	4.35097
1998	6	17	3.7054	4.60282
1998	6	18	3.53961	4.10278
1998	6	19	3.69493	4.57929
1998	6	20	3.08247	3.17543
1998	6	21	3.93489	3.95576
1998	6	22	4.79104	4.37528
1998	6	23	4.28941	4.71393
1998	6	24	4.15117	4.70857
1998	6	25	4.11142	4.7761
1998	6	26	4.42139	4.71793
1998	6	27	4.12182	4.43791
1998	6	28	4.09352	4.68043
1998	6	29	4.00543	4.78025
1998	6	30	4.18031	4.9225
1998	7	1	4.30173	4.88838
1998	7	2	4.14968	4.83581
1998	7	3	4.73907	5.23286
1998	7	4	4.64964	5.03514
1998	7	5	4.98456	4.16164
1998	7	6	3.25357	3.27821
1998	7	7	3.30366	4.07609
1998	7	8	3.86082	4.27676
1998	7	9	4.32619	4.24753
1998	7	10	4.33441	4.78799
1998	7	11	4.30863	4.79299
1998	7	12	4.49395	4.86931
1998	7	13	4.31748	4.86279
1998	7	14	4.17085	4.86661
1998	7	15	4.25052	4.76198
1998	7	16	3.91112	4.20147
1998	7	17	3.87222	4.16327
1998	7	18	3.50051	4.29616
1998	7	19	3.53657	4.65753
1998	7	20	3.63644	4.52982
1998	7	21	3.40617	4.41038
1998	7	22	3.42788	4.56028
1998	7	23	3.71467	4.59775
1998	7	24	3.01461	3.43404
1998	7	25	2.72174	2.8483
1998	7	26	3.45517	3.681
1998	7	27	3.23496	3.84385
1998	7	28	3.44623	4.50138
1998	7	29	3.56287	4.44112
1998	7	30	3.46133	4.18523
1998	7	31	3.11737	3.90703
1998	8	1	3.08723	3.98641
1998	8	2	3.0498	4.24335
1998	8	3	2.9917	4.21297
1998	8	4	2.94959	4.08808
1998	8	5	2.90803	4.29983
1998	8	6	3.10008	4.21813
1998	8	7	3.09998	4.10563
1998	8	8	3.39173	4.14009
1998	8	9	2.99852	4.09314
1998	8	10	3.50044	4.37034
1998	8	11	3.02041	4.1518
1998	8	12	3.25743	4.25506
1998	8	13	3.01723	4.23917
1998	8	14	3.16553	4.14241
1998	8	15	3.34022	3.98341
1998	8	16	3.18317	4.28676
1998	8	17	2.9714	3.8303
1998	8	18	3.13897	4.04083
1998	8	19	3.44699	4.03215
1998	8	20	3.36388	4.14786
1998	8	21	3.36113	4.12475
1998	8	22	3.277	3.98336
1998	8	23	2.91555	3.89594
1998	8	24	2.91545	3.87157
1998	8	25	2.78691	3.61109
1998	8	26	2.67592	3.40043
1998	8	27	2.71402	3.49473
1998	8	28	2.81037	3.40567
1998	8	29	2.64821	3.38292
1998	8	30	2.77034	3.25851
1998	8	31	2.74216	3.18417
1998	9	1	2.27446	3.32426
1998	9	2	2.35608	3.53744
1998	9	3	2.39929	3.20326
1998	9	4	2.44261	2.94821
1998	9	5	2.3113	3.12055
1998	9	6	2.60398	3.2588
1998	9	7	2.08128	3.08034
1998	9	8	2.15634	3.02103
1998	9	9	2.13356	3.08539
1998	9	10	2.12131	3.12641
1998	9	11	2.26063	3.17911
1998	9	12	2.16138	2.9102
1998	9	13	2.3584	2.58751
1998	9	14	2.06201	3.07473
1998	9	15	1.94109	2.72175
1998	9	16	2.19297	2.96048
1998	9	17	2.34678	2.96109
1998	9	18	2.31299	3.00306
1998	9	19	2.24797	2.65451
1998	9	20	2.37735	2.8131
1998	9	21	2.18914	2.69085
1998	9	22	2.18031	2.44217
1998	9	23	1.98357	2.09179
1998	9	24	2.10697	2.54536
1998	9	25	2.39995	2.67062
1998	9	26	2.13478	2.52097
1998	9	27	2.08376	2.51857
1998	9	28	2.26644	2.57165
1998	9	29	2.21975	2.65635
1998	9	30	2.83704	2.83603
1998	10	1	3.22873	3.21431
1998	10	2	1.83036	2.14163
1998	10	3	1.66813	2.08954
1998	10	4	1.81326	2.22411
1998	10	5	1.77454	2.25717
1998	10	6	1.61628	2.16295
1998	10	7	1.61724	2.10569
1998	10	8	3.44558	3.36281
1998	10	9	4.88922	4.92998
1998	10	10	2.22255	2.25836
1998	10	11	1.72209	1.86237
1998	10	12	2.35115	2.4295
1998	10	13	3.52906	3.43373
1998	10	14	2.90915	2.91891
1998	10	15	2.20785	2.38487
1998	10	16	2.29059	2.11101
1998	10	17	2.75514	2.70931
1998	10	18	2.27674	2.32329
1998	10	19	1.62292	1.80462
1998	10	20	1.61127	1.82445
1998	10	21	1.75878	1.91375
1998	10	22	1.61068	1.77961
1998	10	23	1.76744	1.92421
1998	10	24	1.48099	1.61982
1998	10	25	2.03605	1.94455
1998	10	26	1.5921	1.64281
1998	10	27	1.54716	1.52408
1998	10	28	1.24417	0.998312
1998	10	29	2.57738	2.27589
1998	10	30	1.52074	1.62723
1998	10	31	1.6526	1.61344
1999	4	1	2.8035	2.74429
1999	4	2	3.14346	2.93531
1999	4	3	2.40471	2.05916
1999	4	4	2.77808	2.82063
1999	4	5	2.50708	2.54663
1999	4	6	3.3319	3.00976
1999	4	7	2.01283	1.44237
1999	4	8	3.09715	3.13267
1999	4	9	3.14446	3.08318
1999	4	10	2.66154	2.7143
1999	4	11	2.83362	2.97943
1999	4	12	1.66883	1.29144
1999	4	13	3.3259	3.21721
1999	4	14	3.36445	3.00448
1999	4	15	3.57494	3.61892
1999	4	16	3.66344	3.81686
1999	4	17	3.14676	3.35977
1999	4	18	2.99496	3.19844
1999	4	19	3.55537	3.60617
1999	4	20	3.20947	2.79159
1999	4	21	2.88399	2.84647
1999	4	22	4.1251	4.09525
1999	4	23	3.72453	3.8604
1999	4	24	3.31286	3.41976
1999	4	25	4.00372	4.23201
1999	4	26	3.89841	4.17961
1999	4	27	4.3703	4.36974
1999	4	28	3.89157	3.98304
1999	4	29	3.43698	3.47763
1999	4	30	3.88436	4.14429
1999	5	1	3.85056	4.06634
1999	5	2	4.07709	4.37638
1999	5	3	4.54877	4.57585
1999	5	4	4.32878	4.63627
1999	5	5	4.25323	4.54521
1999	5	6	4.42958	4.72414
1999	5	7	4.54856	3.61626
1999	5	8	4.59171	4.57145
1999	5	9	4.02393	3.85949
1999	5	10	4.34249	4.39409
1999	5	11	4.26011	4.45045
1999	5	12	4.19112	4.44969
1999	5	13	4.81324	4.33985
1999	5	14	4.27713	3.88814
1999	5	15	3.95543	4.15395
1999	5	16	4.14385	4.54897
1999	5	17	4.32005	4.40331
1999	5	18	3.95403	4.22811
1999	5	19	4.44517	4.71097
1999	5	20	6.96014	6.94367
1999	5	21	4.36775	4.46551
1999	5	22	4.15797	4.44944
1999	5	23	4.50526	4.8167
1999	5	24	4.87924	5.13201
1999	5	25	6.08763	5.10375
1999	5	26	3.45834	2.57421
1999	5	27	4.38095	4.58211
1999	5	28	4.45195	4.7543
1999	5	29	4.49859	4.52086
1999	5	30	5.05063	4.62624
1999	5	31	4.62543	4.86613
1999	6	1	4.60241	4.87181
1999	6	2	4.84605	5.06725
1999	6	3	5.2829	5.13605
1999	6	4	4.7127	4.85821
1999	6	5	5.34947	5.10476
1999	6	6	4.82756	4.7682
1999	6	7	4.8728	5.21998
1999	6	8	4.8842	5.03481
1999	6	9	4.7584	4.84037
1999	6	10	4.51827	4.81498
1999	6	11	3.90739	3.71829
1999	6	12	4.74706	4.80763
1999	6	13	5.01447	4.58811
1999	6	14	3.68003	3.20425
1999	6	15	4.15013	4.5665
1999	6	16	4.38452	4.95011
1999	6	17	4.75122	5.41882
1999	6	18	5.14022	5.5327
1999	6	19	5.00118	5.27686
1999	6	20	5.12009	5.42484
1999	6	21	4.84499	5.17223
1999	6	22	4.80092	4.7595
1999	6	23	5.793	5.12882
1999	6	24	5.09425	4.70103
1999	6	25	5.43496	5.04808
1999	6	26	4.65984	4.41492
1999	6	27	4.19755	4.63808
1999	6	28	4.27215	4.66811
1999	6	29	4.94509	5.56526
1999	6	30	5.10237	5.43392
1999	7	1	4.91226	5.48408
1999	7	2	4.73461	4.71909
1999	7	3	4.81755	4.6185
1999	7	4	4.68718	5.13198
1999	7	5	4.87268	5.18473
1999	7	6	5.09455	5.38275
1999	7	7	5.1723	5.52007
1999	7	8	5.21986	4.90379
1999	7	9	5.01646	5.50193
1999	7	10	4.81604	5.71504
1999	7	11	5.128	5.78041
1999	7	12	5.17841	5.89731
1999	7	13	4.97847	5.62847
1999	7	14	5.18725	5.58003
1999	7	15	4.88176	4.99788
1999	7	16	4.30054	3.9637
1999	7	17	4.29368	4.89905
1999	7	18	4.47245	4.96996
1999	7	19	4.93499	5.15062
1999	7	20	4.98825	5.52974
1999	7	21	4.91559	5.76884
1999	7	22	4.81391	5.58686
1999	7	23	4.95911	5.14532
1999	7	24	4.86511	5.51501
1999	7	25	5.02675	5.49964
1999	7	26	3.86646	4.18713
1999	7	27	3.95857	4.39678
1999	7	28	4.92256	4.8573
1999	7	29	4.673	5.10895
1999	7	30	4.15718	4.41928
1999	7	31	4.05162	4.23597
1999	8	1	4.22161	4.66775
1999	8	2	3.79166	4.37055
1999	8	3	4.0713	4.45862
1999	8	4	4.07153	4.42042
1999	8	5	4.24602	4.51388
1999	8	6	4.01301	4.62172
1999	8	7	4.38197	5.08391
1999	8	8	4.19091	4.93861
1999	8	9	4.45293	4.68245
1999	8	10	3.89402	4.3802
1999	8	11	3.47968	4.36222
1999	8	12	4.16352	4.94573
1999	8	13	4.38076	5.07655
1999	8	14	4.1595	4.98144
1999	8	15	3.86886	4.3247
1999	8	16	3.78881	4.16255
1999	8	17	3.51828	4.2336
1999	8	18	3.42923	4.35994
1999	8	19	3.65632	4.95661
1999	8	20	3.83585	4.28404
1999	8	21	3.34107	3.8248
1999	8	22	3.70245	3.97582
1999	8	23	3.32269	3.48823
1999	8	24	3.74582	4.03244
1999	8	25	4.30688	4.32928
1999	8	26	3.69191	4.48733
1999	8	27	3.94371	4.5282
1999	8	28	4.85425	5.10568
1999	8	29	4.21999	4.53118
1999	8	30	3.77205	4.36339
1999	8	31	3.98273	4.66558
1999	9	1	3.66901	4.19153
1999	9	2	3.20652	3.95688
1999	9	3	3.50174	4.40916
1999	9	4	3.25931	3.83658
1999	9	5	3.29777	3.96049
1999	9	6	3.05411	3.65806
1999	9	7	2.81511	3.61916
1999	9	8	2.92282	3.93489
1999	9	9	2.9838	3.48499
1999	9	10	2.85027	3.4373
1999	9	11	3.25937	3.82892
1999	9	12	2.46719	2.21081
1999	9	13	2.8944	3.19168
1999	9	14	2.81485	3.03059
1999	9	15	2.85539	2.84909
1999	9	16	2.74503	3.50099
1999	9	17	2.98784	3.42056
1999	9	18	2.77533	3.32453
1999	9	19	3.14019	3.72573
1999	9	20	2.95395	3.07226
1999	9	21	2.94825	3.41931
1999	9	22	2.90308	3.41287
1999	9	23	2.76148	3.09536
1999	9	24	2.7215	3.15393
1999	9	25	2.5479	3.17268
1999	9	26	2.81615	3.42187
1999	9	27	2.60114	3.06821
1999	9	28	2.57365	3.03709
1999	9	29	2.85502	3.28872
1999	9	30	3.91858	4.16677
1999	10	1	1.93629	2.88109
1999	10	2	2.21299	2.62288
1999	10	3	2.2231	2.67829
1999	10	4	1.77143	2.64881
1999	10	5	1.45551	2.67231
1999	10	6	1.75007	2.4658
1999	10	7	1.71167	2.19778
1999	10	8	1.71683	2.35027
1999	10	9	1.46327	1.63327
1999	10	10	1.85806	2.34846
1999	10	11	1.79937	1.92525
1999	10	12	3.23166	3.23339
1999	10	13	2.2277	2.40093
1999	10	14	1.85303	2.09874
1999	10	15	2.05736	2.25406
1999	10	16	2.17605	2.328
1999	10	17	1.91876	2.21236
1999	10	18	2.36462	2.23611
1999	10	19	1.84824	2.16295
1999	10	20	1.9241	2.22651
1999	10	21	1.77176	2.16905
1999	10	22	1.80167	2.23718
1999	10	23	1.28687	1.45379
1999	10	24	2.26403	2.27819
1999	10	25	1.65717	1.56294
1999	10	26	2.04687	2.05384
1999	10	27	1.65052	1.71744
1999	10	28	1.99948	2.09963
1999	10	29	2.21895	2.30175
1999	10	30	2.0888	2.17241
1999	10	31	3.84174	3.76474
2000	4	1	2.60741	2.73968
2000	4	2	4.50982	4.30299
2000	4	3	3.06918	2.94107
2000	4	4	2.37897	2.49095
2000	4	5	1.99547	2.21264
2000	4	6	3.0984	3.34009
2000	4	7	3.9931	3.3978
2000	4	8	3.74593	3.07515
2000	4	9	2.33186	1.75199
2000	4	10	3.20779	3.21447
2000	4	11	2.27155	2.24428
2000	4	12	3.3377	3.09944
2000	4	13	4.90767	3.38433
2000	4	14	3.79333	2.88831
2000	4	15	2.82777	2.86629
2000	4	16	3.00541	3.46448
2000	4	17	4.02713	4.02944
2000	4	18	5.02913	4.52404
2000	4	19	4.51957	2.91399
2000	4	20	2.32717	1.28895
2000	4	21	2.15194	2.1727
2000	4	22	1.80901	1.72482
2000	4	23	2.29624	2.4681
2000	4	24	2.22892	2.27408
2000	4	25	2.82594	2.99893
2000	4	26	3.30271	3.73798
2000	4	27	3.86859	4.10551
2000	4	28	1.99956	1.38814
2000	4	29	2.31824	2.19522
2000	4	30	2.74927	2.84599
2000	5	1	3.72084	4.07173
2000	5	2	3.19099	3.51992
2000	5	3	3.27442	3.56468
2000	5	4	4.33425	3.70653
2000	5	5	2.96549	2.04949
2000	5	6	2.26925	2.13104
2000	5	7	3.15315	3.43816
2000	5	8	3.91377	4.17686
2000	5	9	4.1258	4.38754
2000	5	10	4.23522	4.37948
2000	5	11	4.08614	4.36966
2000	5	12	4.02255	4.37159
2000	5	13	4.09881	4.59678
2000	5	14	3.97053	4.41673
2000	5	15	3.24777	3.73612
2000	5	16	3.37499	3.63137
2000	5	17	2.89919	2.44684
2000	5	18	4.03229	4.39218
2000	5	19	4.24844	4.17496
2000	5	20	3.38046	3.62352
2000	5	21	3.65644	4.13689
2000	5	22	3.86508	4.41023
2000	5	23	3.33236	3.41057
2000	5	24	3.29466	3.38072
2000	5	25	4.12838	4.22418
2000	5	26	3.81458	4.11745
2000	5	27	4.33254	4.70512
2000	5	28	4.43738	4.93343
2000	5	29	4.14972	4.94506
2000	5	30	3.53356	3.86764
2000	5	31	4.30963	4.79328
2000	6	1	4.60302	5.16976
2000	6	2	4.35014	5.13763
2000	6	3	4.68037	4.75857
2000	6	4	3.8672	4.37111
2000	6	5	4.19833	4.83088
2000	6	6	4.68648	5.04519
2000	6	7	4.27817	4.11802
2000	6	8	4.41443	4.87823
2000	6	9	5.23012	5.68218
2000	6	10	2.64142	2.39974
2000	6	11	4.80163	5.38605
2000	6	12	4.27805	5.15584
2000	6	13	6.52274	6.49051
2000	6	14	7.98889	8.00331
2000	6	15	6.14843	6.46703
2000	6	16	4.3667	5.00005
2000	6	17	3.99532	4.96818
2000	6	18	5.02169	5.08707
2000	6	19	5.7001	5.7593
2000	6	20	6.04386	6.02753
2000	6	21	4.48028	4.98268
2000	6	22	4.64476	5.19022
2000	6	23	4.75707	5.23162
2000	6	24	4.42233	5.14083
2000	6	25	4.68305	5.49887
2000	6	26	4.6737	5.35083
2000	6	27	4.58699	5.19051
2000	6	28	4.17326	4.77148
2000	6	29	4.55275	5.47042
2000	6	30	4.33211	5.19975
2000	7	1	4.40822	5.21082
2000	7	2	4.1087	5.20686
2000	7	3	4.53525	5.62704
2000	7	4	4.43292	5.4032
2000	7	5	4.23511	5.42583
2000	7	6	4.17629	5.21942
2000	7	7	4.01446	5.35252
2000	7	8	4.1345	5.37314
2000	7	9	4.2697	5.44364
2000	7	10	4.27907	5.21695
2000	7	11	3.92327	5.18942
2000	7	12	3.91744	5.49089
2000	7	13	4.0965	5.49597
2000	7	14	3.55463	4.41606
2000	7	15	4.15418	4.99207
2000	7	16	3.97092	5.11253
2000	7	17	3.83849	4.56291
2000	7	18	3.74449	4.4702
2000	7	19	3.83951	4.91793
2000	7	20	4.14964	4.85706
2000	7	21	3.92803	4.99259
2000	7	22	3.93559	5.05333
2000	7	23	3.92968	4.77328
2000	7	24	3.89311	5.05377
2000	7	25	3.77643	5.14466
2000	7	26	3.75987	5.17206
2000	7	27	3.9932	5.12652
2000	7	28	4.21057	5.31539
2000	7	29	3.40498	4.73429
2000	7	30	3.52762	4.96481
2000	7	31	4.08555	5.19403
2000	8	1	3.87011	4.96485
2000	8	2	4.90976	5.40864
2000	8	3	4.98123	5.34695
2000	8	4	5.47077	5.92903
2000	8	5	3.35537	4.5018
2000	8	6	3.26865	4.6677
2000	8	7	3.36575	4.72231
2000	8	8	3.46558	4.67203
2000	8	9	3.41994	4.57779
2000	8	10	3.01953	4.06374
2000	8	11	3.01955	4.03314
2000	8	12	2.75393	3.56279
2000	8	13	2.70846	3.82692
2000	8	14	3.17577	4.4024
2000	8	15	3.20314	4.5289
2000	8	16	3.43067	4.49977
2000	8	17	3.31272	4.6453
2000	8	18	3.24361	4.51948
2000	8	19	3.32193	4.08643
2000	8	20	3.13951	4.26498
2000	8	21	3.02213	4.31716
2000	8	22	2.95596	4.238
2000	8	23	3.01905	4.15628
2000	8	24	2.83313	3.4213
2000	8	25	3.06596	4.14682
2000	8	26	3.31657	3.4461
2000	8	27	2.86909	3.53677
2000	8	28	3.82234	4.23003
2000	8	29	3.32968	4.03413
2000	8	30	3.1624	3.99477
2000	8	31	3.90508	4.42871
2000	9	1	3.56509	4.08638
2000	9	2	3.62751	4.16393
2000	9	3	3.43162	3.58876
2000	9	4	3.33305	4.02355
2000	9	5	3.39148	4.16469
2000	9	6	3.81705	3.55424
2000	9	7	4.80662	4.34013
2000	9	8	3.37449	3.89098
2000	9	9	3.37938	3.87097
2000	9	10	3.47142	4.0496
2000	9	11	3.24152	3.83821
2000	9	12	3.75043	3.99942
2000	9	13	3.45311	3.64368
2000	9	14	3.60524	3.38232
2000	9	15	3.03463	3.46296
2000	9	16	2.98024	3.42142
2000	9	17	3.28893	3.26846
2000	9	18	3.11723	3.60655
2000	9	19	3.18019	3.79975
2000	9	20	3.26312	3.8403
2000	9	21	3.03279	3.61951
2000	9	22	4.97638	5.11739
2000	9	23	3.18465	3.79524
2000	9	24	3.52183	3.50817
2000	9	25	3.32411	3.34495
2000	9	26	3.28731	3.06965
2000	9	27	3.06648	3.2229
2000	9	28	2.82234	2.20895
2000	9	29	2.33768	2.03451
2000	9	30	3.08662	3.21166
2000	10	1	2.13879	2.58738
2000	10	2	2.67644	2.94186
2000	10	3	2.11495	2.55043
2000	10	4	2.97492	3.23137
2000	10	5	3.12668	3.31783
2000	10	6	2.50036	2.77961
2000	10	7	2.55416	2.79359
2000	10	8	2.76275	2.43763
2000	10	9	2.87607	2.74717
2000	10	10	1.77504	1.51194
2000	10	11	2.292	2.44175
2000	10	12	1.92957	2.19843
2000	10	13	2.73455	2.89319
2000	10	14	3.51552	3.468
2000	10	15	3.60453	3.38268
2000	10	16	2.29327	2.60365
2000	10	17	2.37945	2.57686
2000	10	18	2.80481	2.58936
2000	10	19	2.05538	2.29272
2000	10	20	1.52552	0.930601
2000	10	21	2.30345	2.29461
2000	10	22	1.99355	1.89415
2000	10	23	1.80562	1.85284
2000	10	24	1.86785	1.30468
2000	10	25	1.70621	1.59209
2000	10	26	1.75273	1.87461
2000	10	27	1.98102	2.07709
2000	10	28	2.05518	1.95004
2000	10	29	1.68121	1.05567
2000	10	30	2.42079	2.26771
2000	10	31	2.35331	2.33413
2001	4	1	4.82349	4.46101
2001	4	2	2.68783	1.6958
2001	4	3	3.67982	3.47675
2001	4	4	3.4732	3.2574
2001	4	5	3.13524	2.95191
2001	4	6	3.5204	2.78482
2001	4	7	3.37934	2.96776
2001	4	8	3.99392	3.8918
2001	4	9	3.72172	3.31822
2001	4	10	3.20819	2.83829
2001	4	11	3.48516	3.2366
2001	4	12	4.18907	3.96323
2001	4	13	3.54511	3.36142
2001	4	14	2.79822	1.96264
2001	4	15	3.66477	3.45722
2001	4	16	3.65738	3.14691
2001	4	17	3.88878	3.50472
2001	4	18	4.09735	3.70887
2001	4	19	4.58552	3.89711
2001	4	20	3.96323	3.9823
2001	4	21	3.28069	3.36446
2001	4	22	4.01818	3.50126
2001	4	23	5.68654	4.5255
2001	4	24	4.73054	4.33928
2001	4	25	4.53897	4.33103
2001	4	26	4.15279	3.83245
2001	4	27	4.27603	4.22546
2001	4	28	4.90195	4.86903
2001	4	29	5.58431	5.56483
2001	4	30	5.62356	5.60161
2001	5	1	5.80385	4.43129
2001	5	2	6.25058	6.144
2001	5	3	4.00655	3.82617
2001	5	4	4.6951	4.49215
2001	5	5	4.52664	4.54459
2001	5	6	3.5108	3.04615
2001	5	7	4.89576	3.91936
2001	5	8	3.03172	2.24441
2001	5	9	2.99088	2.06196
2001	5	10	2.23096	2.01975
2001	5	11	2.75795	1.9682
2001	5	12	4.34294	4.03798
2001	5	13	5.08542	3.91107
2001	5	14	5.54653	4.24509
2001	5	15	3.87618	3.14528
2001	5	16	4.00945	3.73313
2001	5	17	4.79748	4.82024
2001	5	18	5.0928	5.15848
2001	5	19	5.16454	5.24794
2001	5	20	4.74935	4.73052
2001	5	21	5.27014	5.42606
2001	5	22	4.89782	5.04552
2001	5	23	4.86881	5.10573
2001	5	24	6.02454	5.99639
2001	5	25	6.6866	6.67583
2001	5	26	4.83743	4.96882
2001	5	27	4.95834	5.16007
2001	5	28	5.00404	5.07738
2001	5	29	5.75086	5.66953
2001	5	30	5.4337	5.25863
2001	5	31	5.19531	5.30772
2001	6	1	5.40154	5.59181
2001	6	2	5.48833	5.64575
2001	6	3	5.60614	5.76467
2001	6	4	5.25266	5.26427
2001	6	5	5.5522	4.8275
2001	6	6	6.35339	5.22663
2001	6	7	5.47389	5.49244
2001	6	8	5.36199	5.18366
2001	6	9	5.50508	5.50466
2001	6	10	5.86527	6.02251
2001	6	11	5.86935	6.06561
2001	6	12	5.71102	5.95407
2001	6	13	5.47705	5.84806
2001	6	14	5.54631	5.89648
2001	6	15	5.99302	5.83636
2001	6	16	5.05304	4.31944
2001	6	17	6.95739	6.91959
2001	6	18	5.69763	5.81187
2001	6	19	5.7525	5.75463
2001	6	20	5.60272	5.65404
2001	6	21	5.7323	5.73459
2001	6	22	6.5619	6.10709
2001	6	23	5.47866	5.30728
2001	6	24	5.61307	5.63866
2001	6	25	5.83245	5.54935
2001	6	26	5.69895	5.49453
2001	6	27	4.93748	4.78015
2001	6	28	5.36244	5.43555
2001	6	29	5.92016	6.05242
2001	6	30	5.86919	6.22867
2001	7	1	5.68217	5.38833
2001	7	2	5.84293	5.42159
2001	7	3	5.68221	5.11683
2001	7	4	5.60172	5.0974
2001	7	5	5.60295	5.05726
2001	7	6	6.22994	5.72079
2001	7	7	5.89711	5.30945
2001	7	8	5.9819	5.89591
2001	7	9	6.06202	6.36804
2001	7	10	5.77564	5.88971
2001	7	11	5.81212	5.73157
2001	7	12	5.75687	5.65372
2001	7	13	5.33585	4.95756
2001	7	14	5.53407	5.02329
2001	7	15	5.1481	4.55002
2001	7	16	5.12358	4.48206
2001	7	17	5.39714	5.25309
2001	7	18	5.8381	5.3914
2001	7	19	5.41208	5.07135
2001	7	20	5.35496	5.65297
2001	7	21	5.94178	5.81372
2001	7	22	5.06311	5.38762
2001	7	23	5.23428	5.64344
2001	7	24	5.34046	5.39834
2001	7	25	5.46859	5.21436
2001	7	26	5.38221	5.02422
2001	7	27	5.11568	5.0006
2001	7	28	4.3105	3.94294
2001	7	29	4.5957	4.24374
2001	7	30	4.80975	4.3377
2001	7	31	4.66245	4.11314
2001	8	1	5.50105	5.20024
2001	8	2	4.97545	4.91945
2001	8	3	4.8286	5.12823
2001	8	4	4.6267	4.43011
2001	8	5	5.33667	5.07979
2001	8	6	5.04481	4.70145
2001	8	7	4.79324	5.12883
2001	8	8	4.81138	4.80051
2001	8	9	4.68348	4.89024
2001	8	10	4.60081	5.32482
2001	8	11	4.96717	5.19406
2001	8	12	4.68651	4.55816
2001	8	13	4.68368	4.56617
2001	8	14	4.90346	5.03396
2001	8	15	4.68958	5.12698
2001	8	16	4.67742	4.83303
2001	8	17	5.29425	5.05542
2001	8	18	5.0552	4.36459
2001	8	19	4.30419	4.06163
2001	8	20	4.97538	4.8656
2001	8	21	4.76041	4.94314
2001	8	22	4.7527	5.12019
2001	8	23	4.80503	5.03992
2001	8	24	4.96577	5.15174
2001	8	25	4.79873	5.06307
2001	8	26	4.79472	4.81599
2001	8	27	4.68718	5.115
2001	8	28	4.82458	4.8241
2001	8	29	4.93109	4.80778
2001	8	30	5.24572	4.6959
2001	8	31	4.99875	4.75357
2001	9	1	3.63356	4.47903
2001	9	2	3.51307	4.42924
2001	9	3	4.00764	4.38848
2001	9	4	3.75329	4.10853
2001	9	5	4.39318	4.40874
2001	9	6	4.29497	4.19897
2001	9	7	3.88284	3.22627
2001	9	8	4.52223	4.22871
2001	9	9	4.01147	3.81327
2001	9	10	3.87996	4.24178
2001	9	11	3.49843	3.70131
2001	9	12	3.69089	3.87476
2001	9	13	3.7524	4.01048
2001	9	14	3.64011	3.76844
2001	9	15	3.96127	4.00941
2001	9	16	3.58939	3.88635
2001	9	17	3.48342	3.97942
2001	9	18	3.64381	3.97065
2001	9	19	3.72862	3.93323
2001	9	20	3.50798	4.00407
2001	9	21	3.46864	3.85015
2001	9	22	3.28737	3.71384
2001	9	23	3.11175	3.72106
2001	9	24	3.55807	3.84246
2001	9	25	3.37258	3.74329
2001	9	26	3.24404	3.45832
2001	9	27	3.58824	3.64527
2001	9	28	3.87365	3.8273
2001	9	29	4.1233	3.90785
2001	9	30	3.69165	3.71615
2001	10	1	2.82436	2.99028
2001	10	2	2.57353	2.92933
2001	10	3	2.44951	2.81854
2001	10	4	2.73915	3.08717
2001	10	5	2.90029	2.75694
2001	10	6	3.37896	3.22805
2001	10	7	2.71484	2.99889
2001	10	8	2.53396	2.93042
2001	10	9	4.3091	4.35388
2001	10	10	2.41652	2.87194
2001	10	11	2.28167	2.7577
2001	10	12	2.1475	2.70728
2001	10	13	2.06037	2.36746
2001	10	14	2.34694	2.46397
2001	10	15	2.35599	2.62431
2001	10	16	2.7702	2.76616
2001	10	17	2.3772	2.54656
2001	10	18	2.51298	2.57795
2001	10	19	2.97114	2.95936
2001	10	20	2.284	2.39935
2001	10	21	2.54886	2.59149
2001	10	22	2.43829	2.46627
2001	10	23	2.88074	2.67812
2001	10	24	2.93611	2.64184
2001	10	25	3.20192	3.03664
2001	10	26	3.51467	3.63422
2001	10	27	3.05755	2.85303
2001	10	28	2.25275	1.53496
2001	10	29	1.89982	1.81676
2001	10	30	1.99359	1.99102
2001	10	31	1.95465	1.96357
2002	4	1	2.89277	1.53546
2002	4	2	2.41817	1.98592
2002	4	3	3.41198	3.288
2002	4	4	2.35366	1.67658
2002	4	5	3.72605	3.33261
2002	4	6	3.09557	1.92789
2002	4	7	3.49066	3.30571
2002	4	8	3.41482	2.93949
2002	4	9	3.54754	3.31957
2002	4	10	3.67748	3.69638
2002	4	11	3.99262	3.96889
2002	4	12	3.69956	3.63671
2002	4	13	2.20632	1.81506
2002	4	14	3.3981	3.4274
2002	4	15	3.07062	2.47895
2002	4	16	2.56183	1.95728
2002	4	17	4.06781	3.62063
2002	4	18	3.76353	2.94741
2002	4	19	2.50832	1.79813
2002	4	20	3.16698	2.76972
2002	4	21	3.28343	3.18008
2002	4	22	2.80834	2.13044
2002	4	23	3.00969	2.70571
2002	4	24	2.70819	2.17836
2002	4	25	3.61371	3.3889
2002	4	26	3.73201	3.34027
2002	4	27	3.55464	3.44821
2002	4	28	4.1017	3.954
2002	4	29	3.69754	3.4884
2002	4	30	4.01206	3.95451
2002	5	1	4.34631	4.23509
2002	5	2	2.89658	2.3895
2002	5	3	3.97483	3.69969
2002	5	4	4.30584	3.88989
2002	5	5	4.255	3.72093
2002	5	6	4.82446	4.81647
2002	5	7	4.36031	4.26487
2002	5	8	4.31011	4.14161
2002	5	9	4.87748	4.8285
2002	5	10	4.62125	4.58899
2002	5	11	4.55916	4.49398
2002	5	12	4.17615	3.81513
2002	5	13	4.27379	3.89265
2002	5	14	3.20247	2.45442
2002	5	15	3.2645	2.87881
2002	5	16	4.59241	4.40795
2002	5	17	4.18863	4.31658
2002	5	18	3.80093	2.4038
2002	5	19	4.21118	4.00557
2002	5	20	4.75913	4.48821
2002	5	21	4.68668	4.22899
2002	5	22	4.83241	4.51183
2002	5	23	4.15966	3.27202
2002	5	24	4.78191	4.61788
2002	5	25	4.86713	4.85464
2002	5	26	5.16557	5.32793
2002	5	27	4.71428	4.49287
2002	5	28	4.91499	4.39414
2002	5	29	4.40319	4.02274
2002	5	30	5.02268	4.58925
2002	5	31	4.94566	4.53689
2002	6	1	4.07981	3.18313
2002	6	2	4.76842	4.6623
2002	6	3	5.17843	5.20299
2002	6	4	4.67492	4.55623
2002	6	5	4.27008	3.67692
2002	6	6	5.15659	4.93375
2002	6	7	5.21803	5.37389
2002	6	8	4.56468	4.9303
2002	6	9	5.24457	5.49133
2002	6	10	5.15586	5.52072
2002	6	11	6.17136	5.47261
2002	6	12	5.49007	4.74747
2002	6	13	5.1698	5.02829
2002	6	14	5.33328	5.44521
2002	6	15	5.51569	5.3582
2002	6	16	5.21501	4.74165
2002	6	17	5.47878	4.54077
2002	6	18	5.66696	5.13659
2002	6	19	6.8207	6.75725
2002	6	20	6.30856	6.19138
2002	6	21	8.00379	7.51953
2002	6	22	5.22886	5.38212
2002	6	23	5.62793	5.39072
2002	6	24	5.20121	5.22538
2002	6	25	5.36717	5.10903
2002	6	26	4.52409	3.8961
2002	6	27	5.08014	5.03295
2002	6	28	5.08577	4.65925
2002	6	29	5.61015	5.35527
2002	6	30	5.69122	5.68488
2002	7	1	5.15442	5.04168
2002	7	2	4.81909	4.6613
2002	7	3	4.92334	4.84904
2002	7	4	5.45464	5.55604
2002	7	5	5.6558	5.72507
2002	7	6	5.47551	5.62484
2002	7	7	5.48824	5.6402
2002	7	8	5.59844	4.99157
2002	7	9	5.29605	4.70982
2002	7	10	5.66924	5.1667
2002	7	11	5.06968	4.52065
2002	7	12	5.00759	4.58957
2002	7	13	4.56191	4.25163
2002	7	14	4.48601	4.31455
2002	7	15	5.07718	5.35668
2002	7	16	5.46508	5.61327
2002	7	17	5.562	5.8019
2002	7	18	5.37414	5.72462
2002	7	19	5.50749	5.43484
2002	7	20	5.41234	5.55924
2002	7	21	5.01308	5.23125
2002	7	22	4.97346	4.95703
2002	7	23	5.41288	5.03883
2002	7	24	6.7072	6.65979
2002	7	25	5.82612	5.95942
2002	7	26	5.53718	5.329
2002	7	27	5.16078	5.09231
2002	7	28	5.24815	5.45092
2002	7	29	4.91508	5.57728
2002	7	30	5.19962	5.59705
2002	7	31	5.05143	5.59529
2002	8	1	5.04548	5.33185
2002	8	2	6.27765	5.60477
2002	8	3	4.75464	4.50297
2002	8	4	4.28109	4.54122
2002	8	5	4.91679	4.76047
2002	8	6	5.12673	4.9582
2002	8	7	4.91339	5.18527
2002	8	8	5.70035	4.81974
2002	8	9	5.19151	4.60315
2002	8	10	4.75998	4.96406
2002	8	11	4.93455	5.34546
2002	8	12	5.11196	5.66269
2002	8	13	5.10429	5.40699
2002	8	14	5.9294	4.928
2002	8	15	4.95167	4.67316
2002	8	16	4.86508	4.17677
2002	8	17	4.78599	4.17924
2002	8	18	4.22777	3.31666
2002	8	19	4.10565	4.37036
2002	8	20	4.54429	4.5184
2002	8	21	4.50968	4.25968
2002	8	22	4.55278	4.55493
2002	8	23	4.62139	4.91813
2002	8	24	4.63732	4.97452
2002	8	25	4.72824	4.92916
2002	8	26	4.67207	5.00399
2002	8	27	4.61022	4.93154
2002	8	28	4.55563	4.71022
2002	8	29	5.17118	4.86456
2002	8	30	4.68588	4.56524
2002	8	31	4.42994	4.14941
2002	9	1	3.96076	3.97581
2002	9	2	3.92873	4.18005
2002	9	3	4.04607	4.14112
2002	9	4	4.12906	4.04602
2002	9	5	3.53015	3.54231
2002	9	6	3.77656	3.8464
2002	9	7	3.59055	3.40561
2002	9	8	3.73324	3.67758
2002	9	9	4.03387	4.03185
2002	9	10	3.3125	3.31849
2002	9	11	3.87924	3.59597
2002	9	12	3.7969	3.23729
2002	9	13	3.77578	3.75802
2002	9	14	3.4608	3.62782
2002	9	15	3.82849	3.68398
2002	9	16	3.34006	3.67305
2002	9	17	3.65429	3.78813
2002	9	18	4.12872	3.87318
2002	9	19	4.27821	4.32194
2002	9	20	3.46513	3.62614
2002	9	21	3.81157	3.9602
2002	9	22	3.9911	4.15627
2002	9	23	3.51179	3.49633
2002	9	24	2.99272	3.15119
2002	9	25	3.24929	3.41097
2002	9	26	3.18335	3.28084
2002	9	27	3.23421	3.14065
2002	9	28	3.73367	3.43173
2002	9	29	3.12045	3.39985
2002	9	30	2.84762	3.31849
2002	10	1	2.15973	2.78046
2002	10	2	2.74432	1.98066
2002	10	3	3.08383	3.08205
2002	10	4	2.46041	2.66046
2002	10	5	2.51618	2.65277
2002	10	6	2.58764	2.7363
2002	10	7	1.94666	1.96004
2002	10	8	2.6158	2.55881
2002	10	9	2.24415	2.55378
2002	10	10	2.21687	2.65602
2002	10	11	2.38441	2.66633
2002	10	12	2.18152	2.65359
2002	10	13	2.49755	2.7336
2002	10	14	2.49357	1.8316
2002	10	15	2.85833	2.66097
2002	10	16	2.03531	1.96396
2002	10	17	1.82152	2.13427
2002	10	18	2.41127	2.52691
2002	10	19	2.24446	2.46584
2002	10	20	2.3972	2.25592
2002	10	21	3.97671	3.81198
2002	10	22	2.63957	2.62094
2002	10	23	2.19048	2.24123
2002	10	24	2.12106	2.21084
2002	10	25	2.02223	2.08859
2002	10	26	1.94709	2.1744
2002	10	27	2.17708	2.27737
2002	10	28	2.06786	2.1909
2002	10	29	2.30772	2.22505
2002	10	30	3.64551	3.73411
2002	10	31	2.22938	2.22904
2003	4	1	2.99767	2.99259
2003	4	2	3.01011	2.35287
2003	4	3	4.15728	3.16313
2003	4	4	4.02707	3.73815
2003	4	5	4.11579	3.78239
2003	4	6	4.6898	3.84597
2003	4	7	3.34724	3.00331
2003	4	8	3.74818	3.72032
2003	4	9	3.81242	3.42812
2003	4	10	3.39893	3.31858
2003	4	11	3.84642	3.83932
2003	4	12	3.83063	3.83067
2003	4	13	3.91232	3.68871
2003	4	14	2.53181	2.08426
2003	4	15	1.81366	1.44931
2003	4	16	3.39247	3.32203
2003	4	17	2.57149	2.0137
2003	4	18	2.5265	1.63594
2003	4	19	4.51813	3.42779
2003	4	20	3.04832	2.31818
2003	4	21	3.41441	2.62057
2003	4	22	3.29429	3.13678
2003	4	23	2.26549	2.01448
2003	4	24	4.05764	3.51757
2003	4	25	2.36136	1.01636
2003	4	26	2.62732	2.18971
2003	4	27	4.11443	4.19685
2003	4	28	3.8735	3.8482
2003	4	29	3.23179	2.90478
2003	4	30	3.71245	3.78062
2003	5	1	4.69232	4.68524
2003	5	2	5.67795	5.67676
2003	5	3	5.0825	5.16127
2003	5	4	5.24261	5.39597
2003	5	5	5.14634	5.30736
2003	5	6	5.17175	5.34394
2003	5	7	6.91834	6.93122
2003	5	8	6.51577	6.50763
2003	5	9	6.16334	6.17696
2003	5	10	5.80029	5.87816
2003	5	11	5.66422	5.77667
2003	5	12	5.1019	5.30852
2003	5	13	5.01381	5.21726
2003	5	14	5.62328	5.46076
2003	5	15	4.46274	4.21416
2003	5	16	4.80508	4.72843
2003	5	17	4.38108	4.55348
2003	5	18	5.06511	5.21905
2003	5	19	5.17724	5.28778
2003	5	20	4.9944	5.15958
2003	5	21	4.90419	4.67023
2003	5	22	5.12365	4.72355
2003	5	23	5.15618	5.03451
2003	5	24	4.71533	4.94353
2003	5	25	5.76593	5.46132
2003	5	26	5.2997	4.86623
2003	5	27	5.00044	4.89367
2003	5	28	4.43675	3.98446
2003	5	29	3.35067	3.18624
2003	5	30	4.97392	2.95091
2003	5	31	3.46362	2.36862
2003	6	1	4.79888	4.49216
2003	6	2	4.2937	3.88288
2003	6	3	4.56269	4.43513
2003	6	4	4.80023	4.87725
2003	6	5	6.10949	6.17669
2003	6	6	5.92188	6.02311
2003	6	7	5.43237	5.67673
2003	6	8	3.81161	3.16381
2003	6	9	4.84719	4.3511
2003	6	10	4.38045	4.06771
2003	6	11	5.00789	4.54371
2003	6	12	4.42702	4.1812
2003	6	13	5.02149	5.24422
2003	6	14	5.44194	5.59882
2003	6	15	5.57906	5.63862
2003	6	16	5.48522	5.47385
2003	6	17	5.09544	4.68541
2003	6	18	5.62286	5.54025
2003	6	19	5.41831	5.59297
2003	6	20	5.62793	5.18259
2003	6	21	5.25807	4.5104
2003	6	22	5.33614	4.45969
2003	6	23	5.32556	5.42122
2003	6	24	5.63386	5.76902
2003	6	25	5.79063	6.11068
2003	6	26	5.60517	5.6294
2003	6	27	5.37892	5.07363
2003	6	28	4.88993	4.68692
2003	6	29	5.35428	5.29741
2003	6	30	5.95664	5.70774
2003	7	1	5.90438	5.91088
2003	7	2	5.45164	5.55066
2003	7	3	5.29355	5.72415
2003	7	4	5.58319	5.76501
2003	7	5	5.79207	5.92507
2003	7	6	4.73568	4.01945
2003	7	7	5.01871	4.77281
2003	7	8	5.45059	5.34512
2003	7	9	5.43946	4.69514
2003	7	10	4.88135	5.20797
2003	7	11	5.41732	5.51269
2003	7	12	5.81338	5.56036
2003	7	13	5.99403	5.25678
2003	7	14	5.58553	4.88398
2003	7	15	5.3723	4.94282
2003	7	16	5.55558	5.31529
2003	7	17	5.52342	5.25279
2003	7	18	5.49406	5.44032
2003	7	19	5.82035	5.80401
2003	7	20	5.32231	5.57669
2003	7	21	4.89065	5.27952
2003	7	22	4.56494	5.34253
2003	7	23	4.54511	5.48498
2003	7	24	4.29744	5.1952
2003	7	25	3.98775	5.05565
2003	7	26	4.25159	5.22715
2003	7	27	3.82494	5.00425
2003	7	28	4.24448	5.05534
2003	7	29	3.95798	4.92682
2003	7	30	4.04893	5.08994
2003	7	31	3.67122	4.83894
2003	8	1	3.48188	4.98453
2003	8	2	3.4792	4.93868
2003	8	3	3.54975	4.88334
2003	8	4	3.25888	4.57773
2003	8	5	3.00193	4.03817
2003	8	6	3.01923	4.49031
2003	8	7	3.1165	4.77938
2003	8	8	3.02159	3.82767
2003	8	9	3.13278	4.48239
2003	8	10	3.44792	4.60971
2003	8	11	4.01576	4.88063
2003	8	12	3.26682	4.38064
2003	8	13	3.45012	4.68503
2003	8	14	3.48173	4.66228
2003	8	15	3.53108	4.31138
2003	8	16	3.42868	4.29912
2003	8	17	3.48721	4.81289
2003	8	18	3.36957	4.66528
2003	8	19	3.1438	4.30523
2003	8	20	3.39234	4.74232
2003	8	21	3.59856	4.34389
2003	8	22	3.56319	4.53466
2003	8	23	3.36186	4.62343
2003	8	24	3.46614	4.53009
2003	8	25	3.18728	4.05276
2003	8	26	3.61567	4.29932
2003	8	27	3.07729	3.79939
2003	8	28	3.10174	3.96663
2003	8	29	3.08458	4.16643
2003	8	30	3.37352	4.4036
2003	8	31	3.44037	4.53355
2003	9	1	2.73234	4.19789
2003	9	2	2.764	3.78758
2003	9	3	2.73223	3.76332
2003	9	4	2.91711	3.41733
2003	9	5	3.86446	3.21656
2003	9	6	4.06333	4.15795
2003	9	7	4.3679	4.40854
2003	9	8	3.45332	3.71475
2003	9	9	3.25113	3.57583
2003	9	10	2.83169	3.33092
2003	9	11	2.74913	2.92158
2003	9	12	3.38001	3.48673
2003	9	13	3.71617	3.37991
2003	9	14	3.06526	3.3308
2003	9	15	2.66655	3.01699
2003	9	16	2.71546	3.12525
2003	9	17	3.32083	2.81931
2003	9	18	4.25872	4.25021
2003	9	19	3.4969	3.6508
2003	9	20	3.85586	3.94027
2003	9	21	5.36914	5.25383
2003	9	22	4.56338	4.60163
2003	9	23	4.32484	4.43024
2003	9	24	2.86906	3.34673
2003	9	25	2.81045	3.02496
2003	9	26	2.77368	3.22851
2003	9	27	2.84863	3.10891
2003	9	28	2.58819	2.81473
2003	9	29	2.98056	3.10143
2003	9	30	3.18902	3.22169
2003	10	1	2.21805	2.09192
2003	10	2	1.96661	2.34338
2003	10	3	2.14728	2.50199
2003	10	4	2.52964	2.72887
2003	10	5	2.14194	2.67452
2003	10	6	1.86528	2.56747
2003	10	7	2.00395	2.636
2003	10	8	2.44727	2.35601
2003	10	9	1.57676	2.14622
2003	10	10	1.93068	2.44195
2003	10	11	2.28049	2.66544
2003	10	12	2.13408	2.32684
2003	10	13	2.05247	2.20156
2003	10	14	1.87542	2.17391
2003	10	15	2.16737	2.51234
2003	10	16	2.23118	2.47779
2003	10	17	2.01239	2.25216
2003	10	18	1.98997	2.12833
2003	10	19	2.00319	2.16608
2003	10	20	1.77497	1.81148
2003	10	21	1.72922	2.07486
2003	10	22	1.60936	2.14656
2003	10	23	1.77781	2.21895
2003	10	24	1.54657	1.39588
2003	10	25	2.13405	2.11295
2003	10	26	2.57414	1.98092
2003	10	27	2.94935	2.83799
2003	10	28	2.3238	2.05671
2003	10	29	2.51318	2.87199
2003	10	30	1.8437	1.9119
2003	10	31	1.40973	0.901856
2004	4	1	2.99555	2.9297
2004	4	2	3.87663	3.37115
2004	4	3	4.37339	4.43566
2004	4	4	4.03122	4.83576
2004	4	5	3.42292	3.60639
2004	4	6	2.64175	2.5232
2004	4	7	3.18162	3.19949
2004	4	8	3.02843	3.03281
2004	4	9	3.05197	3.00628
2004	4	10	3.91491	3.90843
2004	4	11	3.91202	3.96105
2004	4	12	3.82705	3.94319
2004	4	13	3.59748	3.58973
2004	4	14	3.27835	3.15324
2004	4	15	4.04228	3.65896
2004	4	16	4.20064	4.16895
2004	4	17	3.40631	3.51024
2004	4	18	2.02396	1.62017
2004	4	19	3.67644	3.67218
2004	4	20	3.46592	2.99138
2004	4	21	1.53258	1.3051
2004	4	22	3.27589	3.19388
2004	4	23	3.04315	2.56773
2004	4	24	3.38747	3.03731
2004	4	25	3.13009	3.24242
2004	4	26	4.22823	4.21538
2004	4	27	6.41023	5.29978
2004	4	28	3.97667	3.95551
2004	4	29	4.39035	4.41352
2004	4	30	3.13711	2.73672
2004	5	1	3.99896	3.7965
2004	5	2	4.09701	3.56917
2004	5	3	3.64917	2.84516
2004	5	4	3.77831	3.36377
2004	5	5	3.93404	3.64407
2004	5	6	3.60064	3.78425
2004	5	7	4.53901	4.60659
2004	5	8	3.94376	3.11332
2004	5	9	3.89856	3.59026
2004	5	10	6.34849	5.95142
2004	5	11	5.15168	3.025
2004	5	12	4.5139	3.88778
2004	5	13	4.87272	4.22465
2004	5	14	4.3545	3.97434
2004	5	15	3.87694	3.17949
2004	5	16	4.05561	3.98997
2004	5	17	2.98191	2.68841
2004	5	18	4.78796	4.22434
2004	5	19	3.96494	3.6808
2004	5	20	4.81052	4.7613
2004	5	21	4.67923	4.68892
2004	5	22	4.47335	4.37355
2004	5	23	4.75813	4.337
2004	5	24	4.58932	4.44895
2004	5	25	4.53058	4.4818
2004	5	26	4.62728	4.51651
2004	5	27	4.65764	4.40731
2004	5	28	4.51597	4.576
2004	5	29	4.5689	4.25154
2004	5	30	4.67326	4.56051
2004	5	31	3.46131	3.61743
2004	6	1	4.80907	4.17014
2004	6	2	4.42739	3.94516
2004	6	3	4.99431	4.34686
2004	6	4	4.69689	4.60341
2004	6	5	4.56503	4.78592
2004	6	6	4.92394	4.89911
2004	6	7	5.26554	5.0586
2004	6	8	5.18331	4.3531
2004	6	9	5.04375	4.8826
2004	6	10	5.17062	5.19806
2004	6	11	5.28179	5.26073
2004	6	12	5.04338	5.1128
2004	6	13	5.06759	5.13054
2004	6	14	5.14012	5.06913
2004	6	15	5.41041	5.24307
2004	6	16	5.41527	4.85636
2004	6	17	5.52621	4.90701
2004	6	18	5.12777	4.92615
2004	6	19	4.64057	4.30464
2004	6	20	5.76103	5.12719
2004	6	21	4.91289	4.56553
2004	6	22	4.6454	4.31993
2004	6	23	4.75521	4.17248
2004	6	24	4.82661	4.64124
2004	6	25	4.77636	4.54733
2004	6	26	5.02163	4.95063
2004	6	27	5.50154	5.32793
2004	6	28	5.551	5.23187
2004	6	29	5.94007	6.00069
2004	6	30	5.19412	5.38292
2004	7	1	4.94205	5.20188
2004	7	2	5.25279	5.57544
2004	7	3	5.2907	5.33506
2004	7	4	5.39381	5.26054
2004	7	5	5.30328	5.5344
2004	7	6	5.21018	5.75361
2004	7	7	5.19982	5.57937
2004	7	8	5.24398	5.21603
2004	7	9	5.02053	4.36678
2004	7	10	5.11412	5.6467
2004	7	11	5.62141	5.67838
2004	7	12	5.33507	5.1478
2004	7	13	5.40096	5.24597
2004	7	14	5.05899	4.61886
2004	7	15	6.5705	5.69289
2004	7	16	4.88772	4.85597
2004	7	17	5.27314	5.46293
2004	7	18	5.22115	5.34573
2004	7	19	5.45853	5.57853
2004	7	20	5.11977	5.36121
2004	7	21	5.49675	5.04865
2004	7	22	5.28857	5.28247
2004	7	23	5.18844	5.34559
2004	7	24	4.9982	4.98856
2004	7	25	5.36894	4.85871
2004	7	26	4.52076	4.37658
2004	7	27	4.54304	4.17411
2004	7	28	4.37736	4.09475
2004	7	29	4.8651	4.76613
2004	7	30	4.68632	4.88448
2004	7	31	4.82765	4.67656
2004	8	1	4.62059	4.19839
2004	8	2	4.80693	4.6071
2004	8	3	4.52809	4.2743
2004	8	4	4.49043	4.48312
2004	8	5	4.26606	4.26912
2004	8	6	4.71762	4.34
2004	8	7	4.33345	4.11036
2004	8	8	4.65826	3.97043
2004	8	9	4.43358	4.33918
2004	8	10	4.34883	3.83328
2004	8	11	5.0689	3.86332
2004	8	12	4.89572	4.99379
2004	8	13	4.65116	4.99371
2004	8	14	4.65087	4.98959
2004	8	15	4.92155	4.52236
2004	8	16	4.68912	4.37666
2004	8	17	4.56738	4.34923
2004	8	18	4.65425	4.54891
2004	8	19	4.50484	4.44587
2004	8	20	4.57602	4.60074
2004	8	21	4.62243	4.47626
2004	8	22	4.70549	4.61037
2004	8	23	4.54295	4.27766
2004	8	24	4.43362	4.56685
2004	8	25	4.38799	4.77129
2004	8	26	4.68797	4.8437
2004	8	27	4.65731	4.74284
2004	8	28	4.58756	4.37813
2004	8	29	4.75278	4.22415
2004	8	30	4.25539	4.21399
2004	8	31	4.27285	4.01077
2004	9	1	3.65312	3.80732
2004	9	2	3.6327	3.7648
2004	9	3	3.62937	4.1268
2004	9	4	3.72625	4.00992
2004	9	5	3.74339	4.03029
2004	9	6	4.45495	4.55292
2004	9	7	3.94964	4.08527
2004	9	8	3.50999	3.82541
2004	9	9	4.30982	4.05972
2004	9	10	3.81495	3.69105
2004	9	11	4.64202	4.49116
2004	9	12	6.12012	5.99708
2004	9	13	3.65173	3.71055
2004	9	14	3.69457	3.80109
2004	9	15	3.49003	3.7376
2004	9	16	3.92335	3.80884
2004	9	17	3.47188	3.6277
2004	9	18	3.46213	3.79081
2004	9	19	3.26941	3.54032
2004	9	20	3.43981	3.63537
2004	9	21	3.48941	3.62957
2004	9	22	3.73259	3.39737
2004	9	23	3.52955	3.22833
2004	9	24	3.15028	3.40301
2004	9	25	3.35368	3.38769
2004	9	26	3.06739	3.28832
2004	9	27	3.06334	3.26196
2004	9	28	3.0964	3.34264
2004	9	29	3.13527	3.38194
2004	9	30	3.30413	3.25503
2004	10	1	2.70737	2.85413
2004	10	2	3.86566	3.28062
2004	10	3	2.35689	2.49704
2004	10	4	2.29601	2.58601
2004	10	5	3.50827	3.55262
2004	10	6	2.71366	2.45916
2004	10	7	2.22205	2.11594
2004	10	8	2.95291	2.71597
2004	10	9	2.53795	2.50405
2004	10	10	2.71088	2.66027
2004	10	11	2.44871	2.66019
2004	10	12	2.94238	3.03876
2004	10	13	2.52431	2.57017
2004	10	14	2.51269	2.58091
2004	10	15	2.28919	2.55292
2004	10	16	2.09909	2.2935
2004	10	17	2.31725	2.49451
2004	10	18	2.4676	2.63693
2004	10	19	2.45132	2.59633
2004	10	20	2.47502	2.42976
2004	10	21	2.87776	2.76972
2004	10	22	2.27287	2.29695
2004	10	23	2.35374	2.41178
2004	10	24	2.90551	2.85332
2004	10	25	3.33906	3.22765
2004	10	26	3.4553	3.31578
2004	10	27	3.85628	3.49123
2004	10	28	3.16276	2.94075
2004	10	29	3.49903	2.73991
2004	10	30	2.07558	2.03899
2004	10	31	2.6514	2.49222
2005	4	1	4.64182	3.53152
2005	4	2	2.985	2.18641
2005	4	3	2.19201	1.7393
2005	4	4	2.54958	2.60093
2005	4	5	3.47028	3.48102
2005	4	6	3.74375	3.74359
2005	4	7	3.65861	3.64914
2005	4	8	4.94975	4.78107
2005	4	9	4.60418	4.38098
2005	4	10	3.85517	3.8563
2005	4	11	4.39029	4.40107
2005	4	12	4.04986	4.10114
2005	4	13	5.49593	5.21614
2005	4	14	4.48962	3.97971
2005	4	15	3.84863	3.38203
2005	4	16	3.52741	2.7218
2005	4	17	3.11298	2.98636
2005	4	18	2.54672	1.74854
2005	4	19	4.1255	3.28977
2005	4	20	4.10263	3.35396
2005	4	21	3.67159	3.63706
2005	4	22	3.03476	1.57898
2005	4	23	3.8458	3.30563
2005	4	24	4.40634	4.17024
2005	4	25	4.15248	3.85272
2005	4	26	4.04905	3.83784
2005	4	27	3.9343	3.42226
2005	4	28	3.84184	3.69732
2005	4	29	3.59029	3.53528
2005	4	30	3.35608	2.55861
2005	5	1	4.08059	2.8128
2005	5	2	3.76938	3.73506
2005	5	3	4.23851	4.1671
2005	5	4	4.41966	4.14827
2005	5	5	4.32834	4.29405
2005	5	6	2.96054	2.09436
2005	5	7	3.75134	3.83754
2005	5	8	3.82688	3.45264
2005	5	9	4.36731	3.68054
2005	5	10	4.40727	4.39703
2005	5	11	4.72729	4.77312
2005	5	12	4.5739	4.68206
2005	5	13	3.97944	3.39873
2005	5	14	4.7366	4.77669
2005	5	15	4.75891	4.72993
2005	5	16	3.90298	3.56301
2005	5	17	4.61031	4.65547
2005	5	18	5.05636	5.10538
2005	5	19	5.0445	5.08936
2005	5	20	4.81346	4.88349
2005	5	21	4.40038	4.26696
2005	5	22	5.04126	4.8262
2005	5	23	4.82303	4.28684
2005	5	24	4.47627	4.17917
2005	5	25	4.42231	3.90351
2005	5	26	4.52349	4.17682
2005	5	27	5.46519	5.07035
2005	5	28	4.79742	4.04735
2005	5	29	4.09341	3.10672
2005	5	30	3.73667	2.76038
2005	5	31	3.41365	2.67948
2005	6	1	2.78056	2.36364
2005	6	2	4.1384	3.93141
2005	6	3	4.28168	4.27551
2005	6	4	4.4064	4.30083
2005	6	5	5.15815	4.86901
2005	6	6	5.26129	4.76881
2005	6	7	5.01979	5.08581
2005	6	8	5.41774	5.17476
2005	6	9	5.11338	4.77693
2005	6	10	3.88254	2.97982
2005	6	11	4.73557	4.05965
2005	6	12	5.14591	4.28914
2005	6	13	4.98305	4.54264
2005	6	14	5.14572	5.12276
2005	6	15	4.75857	4.24302
2005	6	16	5.17934	5.02778
2005	6	17	5.49019	5.41218
2005	6	18	5.27394	5.10717
2005	6	19	5.66391	4.6277
2005	6	20	5.68912	4.65255
2005	6	21	4.89254	3.95462
2005	6	22	5.53919	5.16341
2005	6	23	5.87386	5.87348
2005	6	24	5.31949	5.37508
2005	6	25	5.53268	5.20871
2005	6	26	5.75707	5.39897
2005	6	27	5.64649	5.59125
2005	6	28	5.52902	5.36748
2005	6	29	5.44633	4.93239
2005	6	30	5.45144	4.49837
2005	7	1	5.64677	5.02707
2005	7	2	5.07467	4.44972
2005	7	3	5.37754	4.37349
2005	7	4	5.85795	4.90506
2005	7	5	4.99815	4.31745
2005	7	6	5.23385	4.79511
2005	7	7	5.37124	4.74117
2005	7	8	5.22275	4.90545
2005	7	9	5.32744	5.11431
2005	7	10	5.5333	4.99024
2005	7	11	5.47636	5.1262
2005	7	12	5.39868	5.22272
2005	7	13	5.50517	4.94527
2005	7	14	5.59214	4.19603
2005	7	15	5.84611	4.70121
2005	7	16	5.53598	4.76058
2005	7	17	5.18377	5.30206
2005	7	18	5.42988	5.28395
2005	7	19	5.50966	5.43091
2005	7	20	5.39368	5.4627
2005	7	21	5.36305	5.37314
2005	7	22	5.38459	4.92728
2005	7	23	5.46031	4.6205
2005	7	24	5.41592	4.56665
2005	7	25	5.12023	4.43228
2005	7	26	5.09778	4.62655
2005	7	27	5.47009	5.10427
2005	7	28	5.21135	4.85798
2005	7	29	5.15304	4.75519
2005	7	30	5.06121	3.99932
2005	7	31	5.40852	3.67164
2005	8	1	5.11504	4.24391
2005	8	2	4.55491	3.76002
2005	8	3	4.73169	4.92082
2005	8	4	4.76881	5.04883
2005	8	5	4.68279	4.52673
2005	8	6	5.36399	4.85738
2005	8	7	5.50183	5.03531
2005	8	8	5.16914	4.72425
2005	8	9	4.94628	4.77167
2005	8	10	4.89545	4.42151
2005	8	11	4.87026	4.65816
2005	8	12	4.84369	4.88635
2005	8	13	4.99603	4.94557
2005	8	14	5.08229	5.08021
2005	8	15	4.98683	4.88985
2005	8	16	5.02431	4.64022
2005	8	17	4.76948	4.45092
2005	8	18	5.05437	4.77194
2005	8	19	4.84468	4.6122
2005	8	20	4.60168	4.10392
2005	8	21	4.56141	4.31343
2005	8	22	4.52016	4.75291
2005	8	23	4.93152	4.77057
2005	8	24	4.86797	4.36268
2005	8	25	4.84	4.43033
2005	8	26	4.66244	4.35501
2005	8	27	5.08148	4.67585
2005	8	28	4.86972	4.41605
2005	8	29	4.54747	4.51598
2005	8	30	4.69813	4.81843
2005	8	31	5.49515	5.43926
2005	9	1	4.53883	4.41663
2005	9	2	4.17189	3.77097
2005	9	3	3.97226	3.3926
2005	9	4	3.35257	3.43963
2005	9	5	4.84797	4.84138
2005	9	6	4.36557	4.40752
2005	9	7	3.89278	3.98525
2005	9	8	3.87685	3.98128
2005	9	9	3.51093	3.79568
2005	9	10	3.88936	3.86025
2005	9	11	3.80542	3.84487
2005	9	12	3.94594	3.94197
2005	9	13	3.87481	3.9845
2005	9	14	3.67959	3.76303
2005	9	15	3.95774	3.6269
2005	9	16	3.37259	3.42015
2005	9	17	3.58493	3.35183
2005	9	18	3.37323	3.42521
2005	9	19	3.88812	3.68431
2005	9	20	3.67645	3.52472
2005	9	21	3.76672	3.44834
2005	9	22	4.11619	3.76797
2005	9	23	3.70198	3.3968
2005	9	24	3.71694	3.26155
2005	9	25	4.29159	3.40224
2005	9	26	3.51071	3.33959
2005	9	27	3.43699	3.34034
2005	9	28	3.16381	2.71393
2005	9	29	2.64897	2.00378
2005	9	30	3.10804	3.12147
2005	10	1	2.66393	2.79708
2005	10	2	2.34764	2.50998
2005	10	3	2.57867	2.55539
2005	10	4	2.4708	2.72305
2005	10	5	3.21903	3.27036
2005	10	6	2.48316	2.51647
2005	10	7	2.32739	2.50286
2005	10	8	2.78261	2.8312
2005	10	9	2.18392	2.2592
2005	10	10	2.62412	2.73184
2005	10	11	2.12243	2.11775
2005	10	12	2.70137	2.54992
2005	10	13	2.00044	2.26006
2005	10	14	2.4912	2.5413
2005	10	15	2.54407	2.44921
2005	10	16	2.56948	1.70925
2005	10	17	2.67637	2.39205
2005	10	18	2.07103	1.65467
2005	10	19	2.14686	1.54898
2005	10	20	2.57876	2.5214
2005	10	21	2.16869	2.17633
2005	10	22	2.67607	2.69797
2005	10	23	2.703	2.69943
2005	10	24	2.53885	2.53864
2005	10	25	2.46146	2.46983
2005	10	26	2.24945	2.27687
2005	10	27	2.18271	2.21363
2005	10	28	2.0635	2.04464
2005	10	29	2.66278	2.31135
2005	10	30	3.33052	3.30167
2005	10	31	1.91379	1.90645
2006	4	1	3.33071	2.75636
2006	4	2	2.3518	1.30021
2006	4	3	3.25347	3.22873
2006	4	4	3.18033	2.81344
2006	4	5	2.76672	2.15708
2006	4	6	3.0477	2.85948
2006	4	7	1.7457	1.31132
2006	4	8	2.47273	2.40407
2006	4	9	4.80243	4.31795
2006	4	10	3.22783	2.75191
2006	4	11	3.05976	2.80484
2006	4	12	2.1356	1.54354
2006	4	13	2.07869	1.74568
2006	4	14	3.58582	3.2609
2006	4	15	4.72725	3.42227
2006	4	16	3.60384	2.95427
2006	4	17	3.2902	2.1686
2006	4	18	2.63966	2.02123
2006	4	19	3.3326	3.23245
2006	4	20	2.19487	2.08584
2006	4	21	3.22254	2.686
2006	4	22	2.9453	2.63664
2006	4	23	4.81241	4.43176
2006	4	24	2.62663	1.69509
2006	4	25	4.60249	4.48065
2006	4	26	4.7479	5.12457
2006	4	27	3.68243	3.73464
2006	4	28	2.90302	2.71432
2006	4	29	4.89419	4.46582
2006	4	30	4.46863	3.19683
2006	5	1	4.49423	3.65864
2006	5	2	3.80248	3.3341
2006	5	3	3.83117	3.59908
2006	5	4	4.17146	4.05389
2006	5	5	4.10541	3.74217
2006	5	6	4.18666	3.91591
2006	5	7	4.43427	4.27744
2006	5	8	5.38209	4.41856
2006	5	9	4.24385	4.01009
2006	5	10	4.06048	3.82659
2006	5	11	4.17417	3.93051
2006	5	12	4.41783	4.3841
2006	5	13	4.36842	4.14507
2006	5	14	4.66154	4.63984
2006	5	15	4.83977	4.82275
2006	5	16	4.64354	4.06377
2006	5	17	2.88644	1.95859
2006	5	18	3.95731	3.715
2006	5	19	4.29387	4.27776
2006	5	20	4.61084	4.4277
2006	5	21	4.53719	3.8992
2006	5	22	4.35331	4.12418
2006	5	23	4.4318	4.2883
2006	5	24	5.038	5.14722
2006	5	25	5.1652	5.26407
2006	5	26	5.28034	5.09749
2006	5	27	5.38716	4.64269
2006	5	28	5.02039	4.54611
2006	5	29	4.57267	4.70326
2006	5	30	4.60464	4.71553
2006	5	31	5.1048	5.12061
2006	6	1	4.79039	4.18723
2006	6	2	4.86078	4.57206
2006	6	3	4.57399	4.58931
2006	6	4	4.70339	4.76791
2006	6	5	4.76505	4.66345
2006	6	6	5.80312	4.88012
2006	6	7	5.68656	4.6472
2006	6	8	5.41033	4.539
2006	6	9	5.27477	4.87548
2006	6	10	4.9137	4.79764
2006	6	11	5.01633	4.72279
2006	6	12	4.93989	4.77337
2006	6	13	5.01575	4.24388
2006	6	14	5.12213	4.38993
2006	6	15	4.9035	4.73192
2006	6	16	4.8597	4.57301
2006	6	17	4.82244	4.78335
2006	6	18	5.35026	5.13708
2006	6	19	5.04158	5.14249
2006	6	20	5.07859	5.04497
2006	6	21	5.36635	5.00706
2006	6	22	4.83933	4.47936
2006	6	23	5.16583	4.19186
2006	6	24	5.06384	4.58157
2006	6	25	4.82654	4.37191
2006	6	26	5.2019	4.53283
2006	6	27	5.17868	4.06517
2006	6	28	5.38825	4.48126
2006	6	29	4.24347	3.29135
2006	6	30	4.61501	4.43993
2006	7	1	5.34367	4.88943
2006	7	2	5.42732	4.86667
2006	7	3	5.19931	4.27635
2006	7	4	5.16463	4.12296
2006	7	5	4.67669	4.04286
2006	7	6	4.85167	4.52825
2006	7	7	4.64523	4.64129
2006	7	8	4.99675	5.0027
2006	7	9	5.05421	4.89278
2006	7	10	5.08914	4.71649
2006	7	11	5.01778	4.56961
2006	7	12	5.34367	4.94785
2006	7	13	5.05176	4.02385
2006	7	14	4.94019	3.78516
2006	7	15	4.91769	4.39966
2006	7	16	5.01227	4.7519
2006	7	17	5.25561	4.7087
2006	7	18	5.2426	4.9382
2006	7	19	5.28743	5.04274
2006	7	20	5.63544	5.23547
2006	7	21	5.71621	4.89071
2006	7	22	5.3783	4.68969
2006	7	23	5.1481	4.49569
2006	7	24	4.90504	4.55306
2006	7	25	4.87045	4.76202
2006	7	26	5.05955	4.59293
2006	7	27	5.1851	4.58788
2006	7	28	5.4817	4.70448
2006	7	29	5.56658	5.17081
2006	7	30	5.53117	5.13462
2006	7	31	5.11544	4.75746
2006	8	1	4.63099	3.70155
2006	8	2	4.73376	4.34451
2006	8	3	4.5405	4.52237
2006	8	4	4.18443	4.34809
2006	8	5	4.44986	4.0246
2006	8	6	4.84404	4.63425
2006	8	7	4.79662	3.89184
2006	8	8	4.91182	4.12569
2006	8	9	4.61627	4.22441
2006	8	10	4.52171	4.46025
2006	8	11	4.69959	4.27274
2006	8	12	4.64251	4.43756
2006	8	13	4.63316	4.17695
2006	8	14	4.87601	4.37501
2006	8	15	4.4814	4.42898
2006	8	16	4.36796	4.42331
2006	8	17	4.17843	4.10358
2006	8	18	4.39913	4.50104
2006	8	19	4.59795	4.34792
2006	8	20	4.5571	4.82157
2006	8	21	4.62962	4.71776
2006	8	22	4.73674	4.63438
2006	8	23	4.6956	4.5866
2006	8	24	4.482	4.40482
2006	8	25	4.09886	4.1965
2006	8	26	4.49851	4.1408
2006	8	27	4.56161	4.07479
2006	8	28	4.43504	3.77646
2006	8	29	4.94903	4.04853
2006	8	30	4.46865	4.41592
2006	8	31	4.40561	4.00916
2006	9	1	4.09965	4.02728
2006	9	2	3.77717	3.56987
2006	9	3	3.92734	3.88211
2006	9	4	3.88577	4.03276
2006	9	5	4.21117	4.43215
2006	9	6	3.91148	4.09067
2006	9	7	4.4388	4.55303
2006	9	8	3.85121	4.01186
2006	9	9	3.68941	3.90415
2006	9	10	3.28308	3.75003
2006	9	11	3.9788	3.6737
2006	9	12	3.65213	3.82066
2006	9	13	4.0889	4.22516
2006	9	14	3.53142	3.72833
2006	9	15	3.52411	3.67658
2006	9	16	3.52684	3.70807
2006	9	17	3.81956	3.87539
2006	9	18	3.58419	3.63578
2006	9	19	3.39166	3.42965
2006	9	20	3.89758	3.59311
2006	9	21	4.10597	3.37526
2006	9	22	3.59557	2.488
2006	9	23	3.05074	2.62585
2006	9	24	3.78581	3.42699
2006	9	25	2.40316	1.7188
2006	9	26	2.87071	3.01052
2006	9	27	3.3372	3.36888
2006	9	28	2.93946	3.02835
2006	9	29	2.74953	1.81639
2006	9	30	4.20539	3.49886
2006	10	1	2.5555	2.25355
2006	10	2	2.5193	2.71782
2006	10	3	2.55582	2.80439
2006	10	4	2.4187	2.67124
2006	10	5	2.57844	2.79674
2006	10	6	2.318	2.59554
2006	10	7	2.29681	2.57476
2006	10	8	2.4641	2.47708
2006	10	9	2.47018	2.51622
2006	10	10	2.3124	2.34815
2006	10	11	2.07656	2.40451
2006	10	12	2.69912	2.43372
2006	10	13	2.6744	2.36718
2006	10	14	2.22094	2.0704
2006	10	15	2.71781	1.89906
2006	10	16	2.40183	2.31234
2006	10	17	2.04372	1.4479
2006	10	18	2.9911	2.69053
2006	10	19	2.99543	2.79183
2006	10	20	2.27658	1.63213
2006	10	21	2.20312	2.19557
2006	10	22	2.06614	2.07583
2006	10	23	2.11107	2.30914
2006	10	24	2.529	2.36738
2006	10	25	2.19835	2.16965
2006	10	26	2.08454	2.09703
2006	10	27	3.18653	2.67266
2006	10	28	3.24689	2.63792
2006	10	29	2.04368	1.55673
2006	10	30	1.9952	1.35195
2006	10	31	2.72539	1.88982
2007	4	1	3.12675	2.67629
2007	4	2	2.48457	2.34337
2007	4	3	3.16912	3.13778
2007	4	4	3.37702	3.18716
2007	4	5	2.64277	2.36937
2007	4	6	3.77731	2.76001
2007	4	7	3.43083	3.22839
2007	4	8	3.68076	3.54639
2007	4	9	3.80647	3.42316
2007	4	10	3.36002	3.09639
2007	4	11	3.61504	3.44586
2007	4	12	3.05368	2.79605
2007	4	13	3.62348	3.47624
2007	4	14	3.50566	3.33368
2007	4	15	2.20798	1.88839
2007	4	16	2.84421	2.89014
2007	4	17	2.12162	2.1315
2007	4	18	3.62124	3.3883
2007	4	19	3.92366	3.8519
2007	4	20	3.70129	3.35241
2007	4	21	3.46772	3.42849
2007	4	22	3.75994	3.68291
2007	4	23	4.31383	4.03422
2007	4	24	5.02932	5.00589
2007	4	25	3.60907	3.62528
2007	4	26	3.42059	3.23934
2007	4	27	5.25161	4.63314
2007	4	28	3.59759	3.6025
2007	4	29	3.14865	2.74517
2007	4	30	4.09179	3.70345
2007	5	1	3.87842	3.62779
2007	5	2	3.85967	3.78939
2007	5	3	4.59572	4.49223
2007	5	4	5.35603	4.88894
2007	5	5	4.43624	4.32567
2007	5	6	4.91498	4.93332
2007	5	7	5.74078	5.40366
2007	5	8	4.39155	4.27562
2007	5	9	3.73316	2.62954
2007	5	10	2.72362	2.35344
2007	5	11	2.50998	1.51823
2007	5	12	3.32729	2.14777
2007	5	13	3.48855	2.94602
2007	5	14	4.26681	3.76519
2007	5	15	4.21005	4.2576
2007	5	16	4.67919	4.16407
2007	5	17	3.24827	2.3731
2007	5	18	2.89959	1.96422
2007	5	19	4.30218	4.38134
2007	5	20	5.87317	5.25933
2007	5	21	4.45297	3.81657
2007	5	22	4.33364	4.30204
2007	5	23	4.62101	4.22705
2007	5	24	4.48429	4.53353
2007	5	25	4.80717	4.83317
2007	5	26	4.52473	4.1658
2007	5	27	4.55271	4.35265
2007	5	28	5.12031	4.35049
2007	5	29	3.79461	3.69744
2007	5	30	5.02856	4.97604
2007	5	31	5.12944	4.2422
2007	6	1	4.89723	4.31502
2007	6	2	4.12375	3.76198
2007	6	3	4.63525	4.34815
2007	6	4	4.14662	3.77687
2007	6	5	4.54125	4.49834
2007	6	6	4.43126	4.34861
2007	6	7	5.93345	5.4638
2007	6	8	4.54921	4.1224
2007	6	9	3.59083	2.81097
2007	6	10	3.6337	3.65501
2007	6	11	5.26492	4.10636
[truncated: 2,711 more rows]

## Sheet: ETo(-Rs)-mesasured-n & Statisti
Year	Month	Day	ETo-missing-Rs (Measured n, Rsn)	ETo-full data
#	#	#	mm/day	mm/day
1998	4	1	2.85725	2.74032		RMSE, mm/day	MBE, mm/day	MAE, mm/day	RE	d
1998	4	2	2.08799	2.12095		0.389713	0.176057	0.272314	0.0920335	0.974726
1998	4	3	2.91627	2.7115
1998	4	4	3.51119	3.40971
1998	4	5	2.91028	2.97971
1998	4	6	3.26186	3.09217
1998	4	7	3.15663	3.00852
1998	4	8	3.15173	3.08144
1998	4	9	3.43304	3.24399
1998	4	10	3.49368	3.19565
1998	4	11	3.52026	3.6759
1998	4	12	4.47004	4.0979
1998	4	13	4.29364	3.99706
1998	4	14	3.5598	3.31898
1998	4	15	2.39548	2.1991
1998	4	16	3.56157	3.91926
1998	4	17	2.12835	1.72878
1998	4	18	3.95308	3.51869
1998	4	19	3.222	3.01571
1998	4	20	3.38209	3.17907
1998	4	21	3.58671	3.42363
1998	4	22	3.05283	2.86054
1998	4	23	3.32519	3.23816
1998	4	24	3.53016	3.36769
1998	4	25	2.70977	2.52586
1998	4	26	2.01089	1.57045
1998	4	27	2.17799	1.81772
1998	4	28	3.12855	2.72374
1998	4	29	3.27703	2.79605
1998	4	30	3.32344	3.08039
1998	5	1	4.1548	3.62705
1998	5	2	4.10267	3.60159
1998	5	3	3.07763	3.29516
1998	5	4	4.71992	4.28883
1998	5	5	4.25913	4.21028
1998	5	6	3.79817	3.30881
1998	5	7	2.54872	2.38763
1998	5	8	3.79472	3.70605
1998	5	9	4.08554	3.57096
1998	5	10	3.15401	2.84752
1998	5	11	3.42802	3.23132
1998	5	12	3.75562	3.54937
1998	5	13	3.10987	3.00557
1998	5	14	2.71028	2.63219
1998	5	15	3.49948	3.30085
1998	5	16	4.29048	3.70953
1998	5	17	3.10715	2.63077
1998	5	18	2.61513	1.96566
1998	5	19	3.67221	3.31648
1998	5	20	3.29206	2.70039
1998	5	21	3.80993	3.67976
1998	5	22	3.08922	2.83079
1998	5	23	3.20253	2.88726
1998	5	24	4.41875	3.94708
1998	5	25	4.65972	4.18654
1998	5	26	4.46201	3.88993
1998	5	27	4.17947	3.80194
1998	5	28	4.09399	4.03916
1998	5	29	4.79846	4.30259
1998	5	30	4.53583	3.87223
1998	5	31	2.46909	2.85622
1998	6	1	4.55937	4.05917
1998	6	2	4.03878	3.77364
1998	6	3	3.94035	3.66492
1998	6	4	4.74368	4.34613
1998	6	5	4.8405	4.68956
1998	6	6	4.95856	4.37128
1998	6	7	5.05612	4.092
1998	6	8	4.66389	4.16576
1998	6	9	4.18283	3.65447
1998	6	10	4.71317	4.13359
1998	6	11	4.83183	4.3687
1998	6	12	3.26411	3.19814
1998	6	13	5.14754	4.70793
1998	6	14	5.39278	4.75514
1998	6	15	5.5109	4.75326
1998	6	16	4.91221	4.35097
1998	6	17	5.39772	4.60282
1998	6	18	4.44315	4.10278
1998	6	19	5.36098	4.57929
1998	6	20	2.93657	3.17543
1998	6	21	4.40039	3.95576
1998	6	22	4.97853	4.37528
1998	6	23	5.42623	4.71393
1998	6	24	5.44538	4.70857
1998	6	25	5.61705	4.7761
1998	6	26	5.44236	4.71793
1998	6	27	5.27908	4.43791
1998	6	28	5.36585	4.68043
1998	6	29	5.52723	4.78025
1998	6	30	5.67791	4.9225
1998	7	1	5.57327	4.88838
1998	7	2	5.56249	4.83581
1998	7	3	5.93339	5.23286
1998	7	4	5.74793	5.03514
1998	7	5	4.80381	4.16164
1998	7	6	3.95659	3.27821
1998	7	7	4.80175	4.07609
1998	7	8	4.98303	4.27676
1998	7	9	4.78116	4.24753
1998	7	10	5.27027	4.78799
1998	7	11	5.13022	4.79299
1998	7	12	5.41688	4.86931
1998	7	13	5.3658	4.86279
1998	7	14	5.44337	4.86661
1998	7	15	5.31425	4.76198
1998	7	16	4.40948	4.20147
1998	7	17	4.67177	4.16327
1998	7	18	4.84531	4.29616
1998	7	19	5.39417	4.65753
1998	7	20	5.23788	4.52982
1998	7	21	4.86897	4.41038
1998	7	22	5.6809	4.56028
1998	7	23	5.69127	4.59775
1998	7	24	4.08475	3.43404
1998	7	25	2.98967	2.8483
1998	7	26	3.89325	3.681
1998	7	27	4.67642	3.84385
1998	7	28	5.31413	4.50138
1998	7	29	5.06724	4.44112
1998	7	30	5.35759	4.18523
1998	7	31	4.79592	3.90703
1998	8	1	4.5972	3.98641
1998	8	2	5.21484	4.24335
1998	8	3	4.93933	4.21297
1998	8	4	4.79615	4.08808
1998	8	5	5.21846	4.29983
1998	8	6	5.11218	4.21813
1998	8	7	4.94117	4.10563
1998	8	8	4.66614	4.14009
1998	8	9	4.80522	4.09314
1998	8	10	5.14316	4.37034
1998	8	11	4.9402	4.1518
1998	8	12	5.06146	4.25506
1998	8	13	4.90411	4.23917
1998	8	14	4.90975	4.14241
1998	8	15	4.90575	3.98341
1998	8	16	4.97214	4.28676
1998	8	17	4.59704	3.8303
1998	8	18	4.82904	4.04083
1998	8	19	5.16768	4.03215
1998	8	20	5.19694	4.14786
1998	8	21	4.93448	4.12475
1998	8	22	4.69255	3.98336
1998	8	23	4.43979	3.89594
1998	8	24	4.75011	3.87157
1998	8	25	4.00247	3.61109
1998	8	26	4.04208	3.40043
1998	8	27	4.18752	3.49473
1998	8	28	3.30258	3.40567
1998	8	29	3.89658	3.38292
1998	8	30	3.63826	3.25851
1998	8	31	3.15058	3.18417
1998	9	1	3.55841	3.32426
1998	9	2	3.76525	3.53744
1998	9	3	3.47526	3.20326
1998	9	4	3.18488	2.94821
1998	9	5	3.78363	3.12055
1998	9	6	3.49392	3.2588
1998	9	7	3.48639	3.08034
1998	9	8	3.53801	3.02103
1998	9	9	3.47937	3.08539
1998	9	10	3.42607	3.12641
1998	9	11	3.64286	3.17911
1998	9	12	3.25179	2.9102
1998	9	13	2.85566	2.58751
1998	9	14	3.57189	3.07473
1998	9	15	3.05956	2.72175
1998	9	16	3.5452	2.96048
1998	9	17	3.31559	2.96109
1998	9	18	3.33749	3.00306
1998	9	19	3.24197	2.65451
1998	9	20	3.35209	2.8131
1998	9	21	3.27126	2.69085
1998	9	22	2.9238	2.44217
1998	9	23	2.38255	2.09179
1998	9	24	2.9256	2.54536
1998	9	25	3.12212	2.67062
1998	9	26	2.96689	2.52097
1998	9	27	2.92883	2.51857
1998	9	28	2.96469	2.57165
1998	9	29	3.23481	2.65635
1998	9	30	3.22697	2.83603
1998	10	1	3.27185	3.21431
1998	10	2	2.24208	2.14163
1998	10	3	2.21355	2.08954
1998	10	4	2.32886	2.22411
1998	10	5	2.44353	2.25717
1998	10	6	2.22123	2.16295
1998	10	7	2.282	2.10569
1998	10	8	3.46211	3.36281
1998	10	9	4.92778	4.92998
1998	10	10	2.29588	2.25836
1998	10	11	1.94407	1.86237
1998	10	12	2.5157	2.4295
1998	10	13	3.4858	3.43373
1998	10	14	3.17224	2.91891
1998	10	15	2.68117	2.38487
1998	10	16	2.49751	2.11101
1998	10	17	2.8251	2.70931
1998	10	18	2.46795	2.32329
1998	10	19	2.04053	1.80462
1998	10	20	2.08451	1.82445
1998	10	21	2.18776	1.91375
1998	10	22	2.05722	1.77961
1998	10	23	2.15851	1.92421
1998	10	24	1.85759	1.61982
1998	10	25	2.37395	1.94455
1998	10	26	1.93946	1.64281
1998	10	27	1.73683	1.52408
1998	10	28	1.41177	0.998312
1998	10	29	2.50779	2.27589
1998	10	30	1.92044	1.62723
1998	10	31	1.92411	1.61344
1999	4	1	2.23699	2.74429
1999	4	2	2.63353	2.93531
1999	4	3	2.09841	2.05916
1999	4	4	2.50143	2.82063
1999	4	5	2.5303	2.54663
1999	4	6	2.83401	3.00976
1999	4	7	1.60049	1.44237
1999	4	8	3.03286	3.13267
1999	4	9	3.08855	3.08318
1999	4	10	2.42242	2.7143
1999	4	11	2.7502	2.97943
1999	4	12	1.67266	1.29144
1999	4	13	3.05538	3.21721
1999	4	14	2.80525	3.00448
1999	4	15	3.35161	3.61892
1999	4	16	3.11271	3.81686
1999	4	17	2.97509	3.35977
1999	4	18	3.10036	3.19844
1999	4	19	3.37737	3.60617
1999	4	20	2.61326	2.79159
1999	4	21	2.62474	2.84647
1999	4	22	3.78358	4.09525
1999	4	23	3.66518	3.8604
1999	4	24	3.20078	3.41976
1999	4	25	4.16785	4.23201
1999	4	26	4.16318	4.17961
1999	4	27	4.23682	4.36974
1999	4	28	3.64835	3.98304
1999	4	29	3.7506	3.47763
1999	4	30	3.91867	4.14429
1999	5	1	4.36619	4.06634
1999	5	2	4.58026	4.37638
1999	5	3	4.57096	4.57585
1999	5	4	4.74022	4.63627
1999	5	5	4.76244	4.54521
1999	5	6	4.89002	4.72414
1999	5	7	3.73159	3.61626
1999	5	8	4.46502	4.57145
1999	5	9	3.68566	3.85949
1999	5	10	4.48841	4.39409
1999	5	11	4.6071	4.45045
1999	5	12	4.55246	4.44969
1999	5	13	4.52726	4.33985
1999	5	14	3.75989	3.88814
1999	5	15	4.17378	4.15395
1999	5	16	4.70206	4.54897
1999	5	17	4.28332	4.40331
1999	5	18	4.01075	4.22811
1999	5	19	4.77535	4.71097
1999	5	20	6.91719	6.94367
1999	5	21	4.60314	4.46551
1999	5	22	4.4569	4.44944
1999	5	23	5.0878	4.8167
1999	5	24	5.22353	5.13201
1999	5	25	5.04895	5.10375
1999	5	26	2.89615	2.57421
1999	5	27	4.63455	4.58211
1999	5	28	4.6987	4.7543
1999	5	29	4.69698	4.52086
1999	5	30	4.73709	4.62624
1999	5	31	4.7754	4.86613
1999	6	1	5.24278	4.87181
1999	6	2	5.12558	5.06725
1999	6	3	5.09311	5.13605
1999	6	4	5.06123	4.85821
1999	6	5	5.51862	5.10476
1999	6	6	4.7901	4.7682
1999	6	7	5.36346	5.21998
1999	6	8	5.15029	5.03481
1999	6	9	4.67791	4.84037
1999	6	10	4.79648	4.81498
1999	6	11	3.87718	3.71829
1999	6	12	4.98805	4.80763
1999	6	13	4.67989	4.58811
1999	6	14	3.41119	3.20425
1999	6	15	4.66145	4.5665
1999	6	16	5.21132	4.95011
1999	6	17	5.65145	5.41882
1999	6	18	5.35539	5.5327
1999	6	19	5.42374	5.27686
1999	6	20	5.40328	5.42484
1999	6	21	5.45041	5.17223
1999	6	22	4.80855	4.7595
1999	6	23	5.46916	5.12882
1999	6	24	5.31214	4.70103
1999	6	25	5.23422	5.04808
1999	6	26	4.76378	4.41492
1999	6	27	4.73705	4.63808
1999	6	28	5.50023	4.66811
1999	6	29	5.59907	5.56526
1999	6	30	5.56079	5.43392
1999	7	1	5.43706	5.48408
1999	7	2	4.87095	4.71909
1999	7	3	5.0109	4.6185
1999	7	4	5.21161	5.13198
1999	7	5	5.0793	5.18473
1999	7	6	5.32674	5.38275
1999	7	7	5.64785	5.52007
1999	7	8	5.11463	4.90379
1999	7	9	5.46045	5.50193
1999	7	10	5.71393	5.71504
1999	7	11	5.79248	5.78041
1999	7	12	5.79653	5.89731
1999	7	13	5.48127	5.62847
1999	7	14	5.82996	5.58003
1999	7	15	5.08691	4.99788
1999	7	16	3.58946	3.9637
1999	7	17	4.96635	4.89905
1999	7	18	5.2697	4.96996
1999	7	19	5.75743	5.15062
1999	7	20	5.62966	5.52974
1999	7	21	5.57794	5.76884
1999	7	22	5.61534	5.58686
1999	7	23	5.6331	5.14532
1999	7	24	5.86431	5.51501
1999	7	25	5.61379	5.49964
1999	7	26	4.0368	4.18713
1999	7	27	4.14866	4.39678
1999	7	28	5.19903	4.8573
1999	7	29	5.35794	5.10895
1999	7	30	5.2676	4.41928
1999	7	31	5.23366	4.23597
1999	8	1	4.95275	4.66775
1999	8	2	4.23873	4.37055
1999	8	3	4.7014	4.45862
1999	8	4	4.98043	4.42042
1999	8	5	4.55724	4.51388
1999	8	6	4.45592	4.62172
1999	8	7	5.06519	5.08391
1999	8	8	5.02727	4.93861
1999	8	9	4.92486	4.68245
1999	8	10	4.72081	4.3802
1999	8	11	4.98141	4.36222
1999	8	12	5.17116	4.94573
1999	8	13	5.14066	5.07655
1999	8	14	4.98699	4.98144
1999	8	15	4.28105	4.3247
1999	8	16	3.74546	4.16255
1999	8	17	4.27802	4.2336
1999	8	18	4.48858	4.35994
1999	8	19	5.32247	4.95661
1999	8	20	4.52796	4.28404
1999	8	21	3.68482	3.8248
1999	8	22	3.8986	3.97582
1999	8	23	3.31775	3.48823
1999	8	24	3.92581	4.03244
1999	8	25	4.34431	4.32928
1999	8	26	4.59831	4.48733
1999	8	27	4.6548	4.5282
1999	8	28	5.14478	5.10568
1999	8	29	4.69898	4.53118
1999	8	30	4.49712	4.36339
1999	8	31	4.13436	4.66558
1999	9	1	4.18559	4.19153
1999	9	2	3.5728	3.95688
1999	9	3	3.78817	4.40916
1999	9	4	3.83552	3.83658
1999	9	5	3.60408	3.96049
1999	9	6	3.72629	3.65806
1999	9	7	3.53385	3.61916
1999	9	8	3.65632	3.93489
1999	9	9	3.57644	3.48499
1999	9	10	3.55326	3.4373
1999	9	11	3.66271	3.82892
1999	9	12	2.25911	2.21081
1999	9	13	3.25471	3.19168
1999	9	14	2.93228	3.03059
1999	9	15	2.7875	2.84909
1999	9	16	3.31293	3.50099
1999	9	17	3.20852	3.42056
1999	9	18	3.26027	3.32453
1999	9	19	3.74427	3.72573
1999	9	20	2.86727	3.07226
1999	9	21	3.49838	3.41931
1999	9	22	3.33118	3.41287
1999	9	23	2.93098	3.09536
1999	9	24	3.21444	3.15393
1999	9	25	3.32211	3.17268
1999	9	26	3.18008	3.42187
1999	9	27	3.03374	3.06821
1999	9	28	3.04109	3.03709
1999	9	29	3.32113	3.28872
1999	9	30	4.23158	4.16677
1999	10	1	2.92081	2.88109
1999	10	2	2.29534	2.62288
1999	10	3	2.61178	2.67829
1999	10	4	2.27512	2.64881
1999	10	5	2.46347	2.67231
1999	10	6	2.28634	2.4658
1999	10	7	1.42203	2.19778
1999	10	8	2.11644	2.35027
1999	10	9	1.53452	1.63327
1999	10	10	2.22119	2.34846
1999	10	11	1.87777	1.92525
1999	10	12	3.14409	3.23339
1999	10	13	2.25294	2.40093
1999	10	14	1.96344	2.09874
1999	10	15	2.24875	2.25406
1999	10	16	2.36568	2.328
1999	10	17	2.1861	2.21236
1999	10	18	2.19129	2.23611
1999	10	19	2.14477	2.16295
1999	10	20	2.21779	2.22651
1999	10	21	2.22604	2.16905
1999	10	22	2.31835	2.23718
1999	10	23	1.38043	1.45379
1999	10	24	2.46104	2.27819
1999	10	25	1.4034	1.56294
1999	10	26	2.01911	2.05384
1999	10	27	1.71259	1.71744
1999	10	28	2.17043	2.09963
1999	10	29	2.30523	2.30175
1999	10	30	2.22178	2.17241
1999	10	31	3.7005	3.76474
2000	4	1	2.75138	2.73968
2000	4	2	4.29901	4.30299
2000	4	3	2.39983	2.94107
2000	4	4	1.9656	2.49095
2000	4	5	1.79859	2.21264
2000	4	6	3.47581	3.34009
2000	4	7	3.23527	3.3978
2000	4	8	2.90205	3.07515
2000	4	9	1.93541	1.75199
2000	4	10	3.12624	3.21447
2000	4	11	1.84212	2.24428
2000	4	12	2.85276	3.09944
2000	4	13	3.19292	3.38433
2000	4	14	2.68641	2.88831
2000	4	15	2.74843	2.86629
2000	4	16	3.39632	3.46448
2000	4	17	4.14307	4.02944
2000	4	18	3.82355	4.52404
2000	4	19	2.6437	2.91399
2000	4	20	1.67862	1.28895
2000	4	21	1.99148	2.1727
2000	4	22	1.77275	1.72482
2000	4	23	2.29671	2.4681
2000	4	24	2.21176	2.27408
2000	4	25	3.00181	2.99893
2000	4	26	3.53167	3.73798
2000	4	27	3.82978	4.10551
2000	4	28	1.85327	1.38814
2000	4	29	2.02081	2.19522
2000	4	30	2.51797	2.84599
2000	5	1	3.81968	4.07173
2000	5	2	3.15782	3.51992
2000	5	3	3.20451	3.56468
2000	5	4	3.94532	3.70653
2000	5	5	2.43077	2.04949
2000	5	6	2.11279	2.13104
2000	5	7	3.16237	3.43816
2000	5	8	4.14878	4.17686
2000	5	9	4.2894	4.38754
2000	5	10	4.17298	4.37948
2000	5	11	4.38835	4.36966
2000	5	12	4.33004	4.37159
2000	5	13	4.63088	4.59678
2000	5	14	4.11741	4.41673
2000	5	15	3.70995	3.73612
2000	5	16	3.3418	3.63137
2000	5	17	2.55668	2.44684
2000	5	18	4.21967	4.39218
2000	5	19	4.45082	4.17496
2000	5	20	3.953	3.62352
2000	5	21	4.36697	4.13689
2000	5	22	4.4051	4.41023
2000	5	23	3.51348	3.41057
2000	5	24	2.85263	3.38072
2000	5	25	4.37568	4.22418
2000	5	26	4.30963	4.11745
2000	5	27	4.61268	4.70512
2000	5	28	4.75162	4.93343
2000	5	29	4.90054	4.94506
2000	5	30	3.32953	3.86764
2000	5	31	4.55723	4.79328
2000	6	1	4.62833	5.16976
2000	6	2	4.50333	5.13763
2000	6	3	4.44285	4.75857
2000	6	4	4.06053	4.37111
2000	6	5	4.46945	4.83088
2000	6	6	4.34684	5.04519
2000	6	7	3.50333	4.11802
2000	6	8	4.41166	4.87823
2000	6	9	5.61269	5.68218
2000	6	10	5.25091	2.39974
2000	6	11	5.32023	5.38605
2000	6	12	4.97887	5.15584
2000	6	13	6.37067	6.49051
2000	6	14	7.84501	8.00331
2000	6	15	6.31269	6.46703
2000	6	16	5.24666	5.00005
2000	6	17	5.4053	4.96818
2000	6	18	5.02749	5.08707
2000	6	19	5.71748	5.7593
2000	6	20	6.04022	6.02753
2000	6	21	4.95578	4.98268
2000	6	22	5.19617	5.19022
2000	6	23	5.45589	5.23162
2000	6	24	5.42722	5.14083
2000	6	25	5.58066	5.49887
2000	6	26	5.28469	5.35083
2000	6	27	4.98437	5.19051
2000	6	28	5.27664	4.77148
2000	6	29	5.51067	5.47042
2000	6	30	5.22956	5.19975
2000	7	1	5.00269	5.21082
2000	7	2	5.52637	5.20686
2000	7	3	5.49856	5.62704
2000	7	4	5.30076	5.4032
2000	7	5	5.37337	5.42583
2000	7	6	5.40256	5.21942
2000	7	7	5.42768	5.35252
2000	7	8	5.61001	5.37314
2000	7	9	5.53152	5.44364
2000	7	10	5.4566	5.21695
2000	7	11	4.81208	5.18942
2000	7	12	5.38683	5.49089
2000	7	13	5.42856	5.49597
2000	7	14	5.073	4.41606
2000	7	15	5.23741	4.99207
2000	7	16	5.35517	5.11253
2000	7	17	4.86913	4.56291
2000	7	18	4.93255	4.4702
2000	7	19	5.31265	4.91793
2000	7	20	4.85039	4.85706
2000	7	21	5.29255	4.99259
2000	7	22	5.1338	5.05333
2000	7	23	5.20465	4.77328
2000	7	24	5.1389	5.05377
2000	7	25	5.43692	5.14466
2000	7	26	5.51431	5.17206
2000	7	27	5.50975	5.12652
2000	7	28	5.35262	5.31539
2000	7	29	4.91222	4.73429
2000	7	30	5.45391	4.96481
2000	7	31	5.60806	5.19403
2000	8	1	5.00559	4.96485
2000	8	2	5.36932	5.40864
2000	8	3	5.23477	5.34695
2000	8	4	5.89047	5.92903
2000	8	5	4.62211	4.5018
2000	8	6	4.93869	4.6677
2000	8	7	5.03041	4.72231
2000	8	8	5.1213	4.67203
2000	8	9	4.51209	4.57779
2000	8	10	4.14726	4.06374
2000	8	11	4.14245	4.03314
2000	8	12	3.3861	3.56279
2000	8	13	3.29196	3.82692
2000	8	14	4.65233	4.4024
2000	8	15	4.84157	4.5289
2000	8	16	4.72989	4.49977
2000	8	17	4.76021	4.6453
2000	8	18	4.74837	4.51948
2000	8	19	4.08441	4.08643
2000	8	20	4.4923	4.26498
2000	8	21	4.38055	4.31716
2000	8	22	4.1365	4.238
2000	8	23	4.13032	4.15628
2000	8	24	3.70012	3.4213
2000	8	25	3.70641	4.14682
2000	8	26	3.48517	3.4461
2000	8	27	3.12057	3.53677
2000	8	28	3.54217	4.23003
2000	8	29	3.17512	4.03413
2000	8	30	3.26982	3.99477
2000	8	31	4.75246	4.42871
2000	9	1	3.71502	4.08638
2000	9	2	3.89188	4.16393
2000	9	3	3.41986	3.58876
2000	9	4	3.54233	4.02355
2000	9	5	3.78261	4.16469
2000	9	6	3.43876	3.55424
2000	9	7	4.17748	4.34013
2000	9	8	3.73031	3.89098
2000	9	9	3.70683	3.87097
2000	9	10	3.83788	4.0496
2000	9	11	3.70223	3.83821
2000	9	12	3.8259	3.99942
2000	9	13	3.66441	3.64368
2000	9	14	3.43373	3.38232
2000	9	15	3.49878	3.46296
2000	9	16	3.43028	3.42142
2000	9	17	3.43066	3.26846
2000	9	18	3.53625	3.60655
2000	9	19	3.73543	3.79975
2000	9	20	3.71636	3.8403
2000	9	21	3.63678	3.61951
2000	9	22	5.061	5.11739
2000	9	23	3.79014	3.79524
2000	9	24	3.68257	3.50817
2000	9	25	3.49828	3.34495
2000	9	26	3.33023	3.06965
2000	9	27	3.41206	3.2229
2000	9	28	2.19027	2.20895
2000	9	29	1.90205	2.03451
2000	9	30	3.25124	3.21166
2000	10	1	2.33028	2.58738
2000	10	2	2.76391	2.94186
2000	10	3	2.40843	2.55043
2000	10	4	3.08758	3.23137
2000	10	5	3.27707	3.31783
2000	10	6	2.60792	2.77961
2000	10	7	2.59781	2.79359
2000	10	8	2.27806	2.43763
2000	10	9	2.64851	2.74717
2000	10	10	1.5639	1.51194
2000	10	11	2.34257	2.44175
2000	10	12	2.14229	2.19843
2000	10	13	2.78663	2.89319
2000	10	14	3.398	3.468
2000	10	15	3.33063	3.38268
2000	10	16	2.55596	2.60365
2000	10	17	2.53648	2.57686
2000	10	18	2.53544	2.58936
2000	10	19	2.34293	2.29272
2000	10	20	1.2219	0.930601
2000	10	21	2.21987	2.29461
2000	10	22	1.89998	1.89415
2000	10	23	1.77361	1.85284
2000	10	24	1.39963	1.30468
2000	10	25	1.4163	1.59209
2000	10	26	1.93948	1.87461
2000	10	27	2.1437	2.07709
2000	10	28	2.10973	1.95004
2000	10	29	1.19502	1.05567
2000	10	30	2.36905	2.26771
2000	10	31	2.38186	2.33413
2001	4	1	4.43653	4.46101
2001	4	2	2.0165	1.6958
2001	4	3	3.46611	3.47675
2001	4	4	3.27556	3.2574
2001	4	5	2.96629	2.95191
2001	4	6	2.65172	2.78482
2001	4	7	2.53206	2.96776
2001	4	8	3.65776	3.8918
2001	4	9	3.33789	3.31822
2001	4	10	2.92752	2.83829
2001	4	11	3.05206	3.2366
2001	4	12	3.65973	3.96323
2001	4	13	3.41433	3.36142
2001	4	14	2.17661	1.96264
2001	4	15	3.68843	3.45722
2001	4	16	3.12933	3.14691
2001	4	17	3.40811	3.50472
2001	4	18	3.75677	3.70887
2001	4	19	3.84969	3.89711
2001	4	20	3.83937	3.9823
2001	4	21	2.46643	3.36446
2001	4	22	3.31834	3.50126
2001	4	23	4.27641	4.5255
2001	4	24	4.20109	4.33928
2001	4	25	4.11074	4.33103
2001	4	26	3.80206	3.83245
2001	4	27	4.05158	4.22546
2001	4	28	4.80313	4.86903
2001	4	29	5.4843	5.56483
2001	4	30	5.3973	5.60161
2001	5	1	4.15149	4.43129
2001	5	2	5.96837	6.144
2001	5	3	3.99422	3.82617
2001	5	4	4.32249	4.49215
2001	5	5	4.5866	4.54459
2001	5	6	3.29637	3.04615
2001	5	7	4.26039	3.91936
2001	5	8	2.45445	2.24441
2001	5	9	2.02904	2.06196
2001	5	10	2.03582	2.01975
2001	5	11	1.94025	1.9682
2001	5	12	4.14838	4.03798
2001	5	13	3.69401	3.91107
2001	5	14	4.33075	4.24509
2001	5	15	3.19362	3.14528
2001	5	16	3.90573	3.73313
2001	5	17	4.77027	4.82024
2001	5	18	4.98149	5.15848
2001	5	19	5.03828	5.24794
2001	5	20	4.65691	4.73052
2001	5	21	5.22552	5.42606
2001	5	22	4.87972	5.04552
2001	5	23	5.19833	5.10573
2001	5	24	5.99835	5.99639
2001	5	25	6.70242	6.67583
2001	5	26	4.87587	4.96882
2001	5	27	5.0612	5.16007
2001	5	28	4.74984	5.07738
2001	5	29	5.49908	5.66953
2001	5	30	5.33025	5.25863
2001	5	31	5.07817	5.30772
2001	6	1	5.63751	5.59181
2001	6	2	5.79387	5.64575
2001	6	3	5.67831	5.76467
2001	6	4	5.0979	5.26427
2001	6	5	4.63344	4.8275
2001	6	6	4.80935	5.22663
2001	6	7	5.35442	5.49244
2001	6	8	5.12642	5.18366
2001	6	9	5.03549	5.50466
2001	6	10	5.62244	6.02251
2001	6	11	5.53274	6.06561
2001	6	12	5.10719	5.95407
2001	6	13	4.98585	5.84806
2001	6	14	6.07755	5.89648
2001	6	15	5.72745	5.83636
2001	6	16	4.16178	4.31944
2001	6	17	6.83215	6.91959
2001	6	18	5.75999	5.81187
2001	6	19	5.28321	5.75463
2001	6	20	5.53096	5.65404
2001	6	21	5.4035	5.73459
2001	6	22	5.83695	6.10709
2001	6	23	5.41621	5.30728
2001	6	24	5.51202	5.63866
2001	6	25	5.44718	5.54935
2001	6	26	5.55868	5.49453
2001	6	27	4.83236	4.78015
2001	6	28	5.32367	5.43555
2001	6	29	5.90918	6.05242
2001	6	30	6.08891	6.22867
2001	7	1	5.40146	5.38833
2001	7	2	5.2147	5.42159
2001	7	3	4.85588	5.11683
2001	7	4	5.25737	5.0974
2001	7	5	5.27854	5.05726
2001	7	6	5.55238	5.72079
2001	7	7	5.09077	5.30945
2001	7	8	5.70262	5.89591
2001	7	9	6.02948	6.36804
2001	7	10	5.84367	5.88971
2001	7	11	5.50526	5.73157
2001	7	12	5.61942	5.65372
2001	7	13	4.81086	4.95756
2001	7	14	5.01776	5.02329
2001	7	15	4.50833	4.55002
2001	7	16	4.03294	4.48206
2001	7	17	4.99447	5.25309
2001	7	18	5.31069	5.3914
2001	7	19	4.9465	5.07135
2001	7	20	5.49177	5.65297
2001	7	21	5.53218	5.81372
2001	7	22	5.38508	5.38762
2001	7	23	5.68617	5.64344
2001	7	24	5.19998	5.39834
2001	7	25	4.97827	5.21436
2001	7	26	5.1623	5.02422
2001	7	27	4.68071	5.0006
2001	7	28	3.5011	3.94294
2001	7	29	3.98186	4.24374
2001	7	30	3.7614	4.3377
2001	7	31	3.89482	4.11314
2001	8	1	4.69444	5.20024
2001	8	2	4.923	4.91945
2001	8	3	4.86991	5.12823
2001	8	4	3.8622	4.43011
2001	8	5	5.02621	5.07979
2001	8	6	4.75745	4.70145
2001	8	7	4.92069	5.12883
2001	8	8	4.64642	4.80051
2001	8	9	4.71394	4.89024
2001	8	10	5.61779	5.32482
2001	8	11	5.00761	5.19406
2001	8	12	4.1744	4.55816
2001	8	13	4.76864	4.56617
2001	8	14	5.16111	5.03396
2001	8	15	5.1754	5.12698
2001	8	16	4.95359	4.83303
2001	8	17	5.1882	5.05542
2001	8	18	4.32134	4.36459
2001	8	19	3.8852	4.06163
2001	8	20	5.18023	4.8656
2001	8	21	4.8547	4.94314
2001	8	22	5.22444	5.12019
2001	8	23	5.23613	5.03992
2001	8	24	5.14635	5.15174
2001	8	25	5.21522	5.06307
2001	8	26	4.79483	4.81599
2001	8	27	5.11583	5.115
2001	8	28	4.90621	4.8241
2001	8	29	4.45151	4.80778
2001	8	30	4.0544	4.6959
2001	8	31	3.82664	4.75357
2001	9	1	4.12955	4.47903
2001	9	2	4.03093	4.42924
2001	9	3	4.03364	4.38848
2001	9	4	3.69455	4.10853
2001	9	5	4.25533	4.40874
2001	9	6	4.02392	4.19897
2001	9	7	2.91368	3.22627
2001	9	8	4.15658	4.22871
2001	9	9	3.64871	3.81327
2001	9	10	3.87396	4.24178
2001	9	11	3.80296	3.70131
2001	9	12	3.76616	3.87476
2001	9	13	3.65764	4.01048
2001	9	14	3.59537	3.76844
2001	9	15	3.88879	4.00941
2001	9	16	3.65644	3.88635
2001	9	17	3.81496	3.97942
2001	9	18	3.83489	3.97065
2001	9	19	3.83417	3.93323
2001	9	20	3.84934	4.00407
2001	9	21	3.62397	3.85015
2001	9	22	3.75431	3.71384
2001	9	23	3.76145	3.72106
2001	9	24	3.88582	3.84246
2001	9	25	3.63169	3.74329
2001	9	26	3.4277	3.45832
2001	9	27	3.57609	3.64527
2001	9	28	3.70687	3.8273
2001	9	29	3.90209	3.90785
2001	9	30	3.72319	3.71615
2001	10	1	2.81032	2.99028
2001	10	2	2.67574	2.92933
2001	10	3	2.62961	2.81854
2001	10	4	2.87848	3.08717
2001	10	5	2.58799	2.75694
2001	10	6	3.01024	3.22805
2001	10	7	2.63403	2.99889
2001	10	8	2.77776	2.93042
2001	10	9	4.28751	4.35388
2001	10	10	2.67439	2.87194
2001	10	11	2.55094	2.7577
2001	10	12	2.49734	2.70728
2001	10	13	2.16727	2.36746
2001	10	14	2.0598	2.46397
2001	10	15	2.5788	2.62431
2001	10	16	2.74147	2.76616
2001	10	17	2.5033	2.54656
2001	10	18	2.55846	2.57795
2001	10	19	2.9158	2.95936
2001	10	20	2.36274	2.39935
2001	10	21	2.60345	2.59149
2001	10	22	2.57506	2.46627
2001	10	23	2.75125	2.67812
2001	10	24	2.61735	2.64184
2001	10	25	3.02996	3.03664
2001	10	26	3.61654	3.63422
2001	10	27	2.81026	2.85303
2001	10	28	1.58656	1.53496
2001	10	29	1.84265	1.81676
2001	10	30	1.999	1.99102
2001	10	31	2.01423	1.96357
2002	4	1	1.89915	1.53546
2002	4	2	2.01294	1.98592
2002	4	3	3.20402	3.288
2002	4	4	1.87041	1.67658
2002	4	5	3.3339	3.33261
2002	4	6	2.16698	1.92789
2002	4	7	3.31456	3.30571
2002	4	8	2.87453	2.93949
2002	4	9	3.06747	3.31957
2002	4	10	3.56916	3.69638
2002	4	11	3.82886	3.96889
2002	4	12	3.50517	3.63671
2002	4	13	1.84068	1.81506
2002	4	14	3.20194	3.4274
2002	4	15	2.42967	2.47895
2002	4	16	2.08426	1.95728
2002	4	17	3.82047	3.62063
2002	4	18	2.98777	2.94741
2002	4	19	1.83607	1.79813
2002	4	20	2.79101	2.76972
2002	4	21	2.12108	3.18008
2002	4	22	3.37505	2.13044
2002	4	23	2.44861	2.70571
2002	4	24	2.18541	2.17836
2002	4	25	3.53278	3.3889
2002	4	26	3.39093	3.34027
2002	4	27	3.72624	3.44821
2002	4	28	3.92906	3.954
2002	4	29	3.8454	3.4884
2002	4	30	3.87184	3.95451
2002	5	1	4.4388	4.23509
2002	5	2	2.92543	2.3895
2002	5	3	4.33133	3.69969
2002	5	4	4.28591	3.88989
2002	5	5	4.46108	3.72093
2002	5	6	4.89939	4.81647
2002	5	7	4.79633	4.26487
2002	5	8	4.46309	4.14161
2002	5	9	4.90185	4.8285
2002	5	10	4.78309	4.58899
2002	5	11	4.88722	4.49398
2002	5	12	4.02925	3.81513
2002	5	13	4.5116	3.89265
2002	5	14	2.51771	2.45442
2002	5	15	2.67222	2.87881
2002	5	16	4.62024	4.40795
2002	5	17	4.83612	4.31658
2002	5	18	3.01847	2.4038
2002	5	19	4.61865	4.00557
2002	5	20	4.57779	4.48821
2002	5	21	4.79561	4.22899
2002	5	22	4.95051	4.51183
2002	5	23	3.34302	3.27202
2002	5	24	4.75876	4.61788
2002	5	25	4.75521	4.85464
2002	5	26	5.42926	5.32793
2002	5	27	5.09658	4.49287
2002	5	28	4.70686	4.39414
2002	5	29	4.12313	4.02274
2002	5	30	5.05774	4.58925
2002	5	31	4.83981	4.53689
2002	6	1	3.62617	3.18313
2002	6	2	5.09462	4.6623
2002	6	3	5.28133	5.20299
2002	6	4	5.08734	4.55623
2002	6	5	4.01167	3.67692
2002	6	6	5.31801	4.93375
2002	6	7	5.57415	5.37389
2002	6	8	5.02867	4.9303
2002	6	9	5.64066	5.49133
2002	6	10	6.11047	5.52072
2002	6	11	5.95393	5.47261
2002	6	12	5.14551	4.74747
2002	6	13	5.72205	5.02829
2002	6	14	5.78891	5.44521
2002	6	15	5.6137	5.3582
2002	6	16	5.49141	4.74165
2002	6	17	4.21319	4.54077
2002	6	18	4.74884	5.13659
2002	6	19	6.55916	6.75725
2002	6	20	6.27833	6.19138
2002	6	21	7.25152	7.51953
2002	6	22	5.58777	5.38212
2002	6	23	4.54112	5.39072
2002	6	24	4.49938	5.22538
2002	6	25	5.38054	5.10903
2002	6	26	3.21057	3.8961
2002	6	27	5.24237	5.03295
2002	6	28	5.14279	4.65925
2002	6	29	5.81075	5.35527
2002	6	30	5.66076	5.68488
2002	7	1	5.01218	5.04168
2002	7	2	4.57994	4.6613
2002	7	3	5.16715	4.84904
2002	7	4	5.69825	5.55604
2002	7	5	5.94628	5.72507
2002	7	6	5.70984	5.62484
2002	7	7	5.74744	5.6402
2002	7	8	5.40278	4.99157
2002	7	9	4.98329	4.70982
2002	7	10	5.81646	5.1667
2002	7	11	4.75562	4.52065
2002	7	12	5.06425	4.58957
2002	7	13	4.34197	4.25163
2002	7	14	4.5635	4.31455
2002	7	15	5.65882	5.35668
2002	7	16	5.77678	5.61327
2002	7	17	5.98764	5.8019
2002	7	18	6.07476	5.72462
2002	7	19	5.81997	5.43484
2002	7	20	5.95229	5.55924
2002	7	21	5.60654	5.23125
2002	7	22	5.41477	4.95703
2002	7	23	5.36771	5.03883
2002	7	24	6.78096	6.65979
2002	7	25	6.20119	5.95942
2002	7	26	5.86095	5.329
2002	7	27	5.79771	5.09231
2002	7	28	5.67712	5.45092
2002	7	29	5.92613	5.57728
2002	7	30	6.03764	5.59705
2002	7	31	6.08249	5.59529
2002	8	1	5.50578	5.33185
2002	8	2	5.69777	5.60477
2002	8	3	4.7504	4.50297
2002	8	4	5.09739	4.54122
2002	8	5	4.92951	4.76047
2002	8	6	5.26871	4.9582
2002	8	7	5.29102	5.18527
2002	8	8	5.14396	4.81974
2002	8	9	5.05833	4.60315
2002	8	10	5.42763	4.96406
2002	8	11	5.53037	5.34546
2002	8	12	5.57867	5.66269
2002	8	13	5.56609	5.40699
2002	8	14	5.40393	4.928
2002	8	15	5.07622	4.67316
2002	8	16	4.69609	4.17677
2002	8	17	4.46798	4.17924
2002	8	18	3.75371	3.31666
2002	8	19	4.61354	4.37036
2002	8	20	5.023	4.5184
2002	8	21	4.78919	4.25968
2002	8	22	5.0248	4.55493
2002	8	23	5.0626	4.91813
2002	8	24	5.18808	4.97452
2002	8	25	5.08142	4.92916
2002	8	26	5.14253	5.00399
2002	8	27	4.98936	4.93154
2002	8	28	5.03157	4.71022
2002	8	29	5.27809	4.86456
2002	8	30	5.12448	4.56524
2002	8	31	4.46066	4.14941
2002	9	1	3.91149	3.97581
2002	9	2	4.1245	4.18005
2002	9	3	3.94884	4.14112
2002	9	4	3.92056	4.04602
2002	9	5	3.54214	3.54231
2002	9	6	3.72335	3.8464
2002	9	7	3.32101	3.40561
2002	9	8	3.76435	3.67758
2002	9	9	4.03553	4.03185
2002	9	10	3.14716	3.31849
2002	9	11	3.59924	3.59597
2002	9	12	3.15076	3.23729
2002	9	13	3.77459	3.75802
2002	9	14	3.77311	3.62782
2002	9	15	3.71065	3.68398
2002	9	16	3.7803	3.67305
2002	9	17	3.8365	3.78813
2002	9	18	4.0171	3.87318
2002	9	19	4.29186	4.32194
2002	9	20	3.58973	3.62614
2002	9	21	4.05432	3.9602
2002	9	22	4.29392	4.15627
2002	9	23	3.81772	3.49633
2002	9	24	3.4003	3.15119
2002	9	25	3.63376	3.41097
2002	9	26	3.45621	3.28084
2002	9	27	3.41587	3.14065
2002	9	28	3.73252	3.43173
2002	9	29	3.57533	3.39985
2002	9	30	3.62185	3.31849
2002	10	1	2.40844	2.78046
2002	10	2	1.88614	1.98066
2002	10	3	3.00492	3.08205
2002	10	4	2.54506	2.66046
2002	10	5	2.42757	2.65277
2002	10	6	2.61331	2.7363
2002	10	7	1.73882	1.96004
2002	10	8	2.69957	2.55881
2002	10	9	2.42288	2.55378
2002	10	10	2.54445	2.65602
2002	10	11	2.6667	2.66633
2002	10	12	2.64516	2.65359
2002	10	13	2.657	2.7336
2002	10	14	1.87429	1.8316
2002	10	15	2.56556	2.66097
2002	10	16	1.76364	1.96396
2002	10	17	2.28249	2.13427
2002	10	18	2.59942	2.52691
2002	10	19	2.52022	2.46584
2002	10	20	2.17925	2.25592
2002	10	21	3.77236	3.81198
2002	10	22	2.66868	2.62094
2002	10	23	2.32139	2.24123
2002	10	24	2.30432	2.21084
2002	10	25	2.14104	2.08859
2002	10	26	2.32447	2.1744
2002	10	27	2.3961	2.27737
2002	10	28	2.28231	2.1909
2002	10	29	2.39522	2.22505
2002	10	30	3.74935	3.73411
2002	10	31	2.35315	2.22904
2003	4	1	3.11971	2.99259
2003	4	2	2.35668	2.35287
2003	4	3	3.35147	3.16313
2003	4	4	3.93296	3.73815
2003	4	5	3.78785	3.78239
2003	4	6	3.9822	3.84597
2003	4	7	2.95824	3.00331
2003	4	8	3.72072	3.72032
2003	4	9	3.39618	3.42812
2003	4	10	3.29124	3.31858
2003	4	11	3.64274	3.83932
2003	4	12	3.62741	3.83067
2003	4	13	3.25076	3.68871
2003	4	14	1.83953	2.08426
2003	4	15	1.62473	1.44931
2003	4	16	3.37665	3.32203
2003	4	17	2.05357	2.0137
2003	4	18	2.07354	1.63594
2003	4	19	3.48716	3.42779
2003	4	20	2.6418	2.31818
2003	4	21	2.54425	2.62057
2003	4	22	3.19802	3.13678
2003	4	23	2.16444	2.01448
2003	4	24	3.27194	3.51757
2003	4	25	1.75306	1.01636
2003	4	26	2.44376	2.18971
2003	4	27	4.08762	4.19685
2003	4	28	3.7269	3.8482
2003	4	29	3.20034	2.90478
2003	4	30	3.8889	3.78062
2003	5	1	4.96316	4.68524
2003	5	2	5.64099	5.67676
2003	5	3	4.96454	5.16127
2003	5	4	5.23396	5.39597
2003	5	5	5.32928	5.30736
2003	5	6	5.29467	5.34394
2003	5	7	6.80108	6.93122
2003	5	8	6.2406	6.50763
2003	5	9	5.96417	6.17696
2003	5	10	5.85132	5.87816
2003	5	11	5.82413	5.77667
2003	5	12	5.3344	5.30852
2003	5	13	5.2915	5.21726
2003	5	14	5.49459	5.46076
2003	5	15	3.47794	4.21416
2003	5	16	4.44481	4.72843
2003	5	17	4.43328	4.55348
2003	5	18	4.94982	5.21905
2003	5	19	5.19408	5.28778
2003	5	20	4.81902	5.15958
2003	5	21	4.74191	4.67023
2003	5	22	4.3505	4.72355
2003	5	23	5.18407	5.03451
2003	5	24	4.87079	4.94353
2003	5	25	5.45393	5.46132
2003	5	26	5.02984	4.86623
2003	5	27	4.76664	4.89367
2003	5	28	3.80496	3.98446
2003	5	29	2.84086	3.18624
2003	5	30	2.76658	2.95091
2003	5	31	2.26955	2.36862
2003	6	1	4.72096	4.49216
2003	6	2	3.49403	3.88288
2003	6	3	4.84278	4.43513
2003	6	4	5.23565	4.87725
2003	6	5	6.04882	6.17669
2003	6	6	5.94599	6.02311
2003	6	7	5.75788	5.67673
2003	6	8	3.68325	3.16381
2003	6	9	4.57911	4.3511
2003	6	10	3.91799	4.06771
2003	6	11	4.84779	4.54371
2003	6	12	4.0683	4.1812
2003	6	13	5.53239	5.24422
2003	6	14	5.7811	5.59882
2003	6	15	5.61428	5.63862
2003	6	16	5.60625	5.47385
2003	6	17	5.14046	4.68541
2003	6	18	5.89512	5.54025
2003	6	19	5.58606	5.59297
2003	6	20	5.58081	5.18259
2003	6	21	4.4825	4.5104
2003	6	22	4.33053	4.45969
2003	6	23	5.75486	5.42122
2003	6	24	5.82575	5.76902
2003	6	25	5.96186	6.11068
2003	6	26	5.90585	5.6294
2003	6	27	5.62692	5.07363
2003	6	28	5.22619	4.68692
2003	6	29	5.4428	5.29741
2003	6	30	5.94334	5.70774
2003	7	1	5.73584	5.91088
2003	7	2	5.79519	5.55066
2003	7	3	5.95401	5.72415
2003	7	4	5.68781	5.76501
2003	7	5	6.38189	5.92507
2003	7	6	3.86443	4.01945
2003	7	7	4.9182	4.77281
2003	7	8	5.63179	5.34512
2003	7	9	5.03176	4.69514
2003	7	10	5.56811	5.20797
2003	7	11	5.62296	5.51269
2003	7	12	5.69757	5.56036
2003	7	13	5.92557	5.25678
2003	7	14	5.28619	4.88398
2003	7	15	5.02862	4.94282
2003	7	16	5.47496	5.31529
2003	7	17	5.34267	5.25279
2003	7	18	5.66032	5.44032
2003	7	19	5.97002	5.80401
2003	7	20	5.95312	5.57669
2003	7	21	5.61971	5.27952
2003	7	22	5.61774	5.34253
2003	7	23	5.57176	5.48498
2003	7	24	5.42806	5.1952
2003	7	25	5.4843	5.05565
2003	7	26	5.51687	5.22715
2003	7	27	5.17194	5.00425
2003	7	28	5.59528	5.05534
2003	7	29	5.37224	4.92682
2003	7	30	5.4358	5.08994
2003	7	31	5.57714	4.83894
2003	8	1	5.07534	4.98453
2003	8	2	5.09593	4.93868
2003	8	3	5.17634	4.88334
2003	8	4	4.34876	4.57773
2003	8	5	4.36011	4.03817
2003	8	6	4.61903	4.49031
2003	8	7	4.94013	4.77938
2003	8	8	3.89695	3.82767
2003	8	9	5.26176	4.48239
2003	8	10	4.68347	4.60971
2003	8	11	5.11821	4.88063
2003	8	12	4.95217	4.38064
2003	8	13	4.94211	4.68503
2003	8	14	4.75921	4.66228
2003	8	15	4.57085	4.31138
2003	8	16	4.6078	4.29912
2003	8	17	4.97776	4.81289
2003	8	18	4.92418	4.66528
2003	8	19	4.6876	4.30523
2003	8	20	4.9673	4.74232
2003	8	21	5.10343	4.34389
2003	8	22	5.01152	4.53466
2003	8	23	4.97056	4.62343
2003	8	24	4.99165	4.53009
2003	8	25	4.82277	4.05276
2003	8	26	4.80822	4.29932
2003	8	27	4.07978	3.79939
2003	8	28	3.62017	3.96663
2003	8	29	3.81617	4.16643
2003	8	30	3.84724	4.4036
2003	8	31	3.42396	4.53355
2003	9	1	3.93273	4.19789
2003	9	2	3.85373	3.78758
2003	9	3	3.83126	3.76332
2003	9	4	3.54379	3.41733
2003	9	5	3.28244	3.21656
2003	9	6	4.00738	4.15795
2003	9	7	4.20515	4.40854
2003	9	8	3.56365	3.71475
2003	9	9	3.63222	3.57583
2003	9	10	3.36618	3.33092
2003	9	11	2.58012	2.92158
2003	9	12	3.64748	3.48673
2003	9	13	3.48738	3.37991
2003	9	14	3.54024	3.3308
2003	9	15	3.14747	3.01699
2003	9	16	3.12518	3.12525
2003	9	17	3.13123	2.81931
2003	9	18	4.19599	4.25021
2003	9	19	3.60887	3.6508
2003	9	20	3.81629	3.94027
2003	9	21	5.19377	5.25383
2003	9	22	4.59221	4.60163
2003	9	23	4.52391	4.43024
2003	9	24	3.49089	3.34673
2003	9	25	3.33603	3.02496
2003	9	26	3.48466	3.22851
2003	9	27	3.293	3.10891
2003	9	28	3.27758	2.81473
2003	9	29	3.41173	3.10143
2003	9	30	3.43136	3.22169
2003	10	1	1.95274	2.09192
2003	10	2	2.08626	2.34338
2003	10	3	2.40627	2.50199
2003	10	4	2.67177	2.72887
2003	10	5	2.57119	2.67452
2003	10	6	2.46491	2.56747
2003	10	7	2.58623	2.636
2003	10	8	2.2251	2.35601
2003	10	9	2.05554	2.14622
2003	10	10	2.44793	2.44195
2003	10	11	2.55155	2.66544
2003	10	12	2.32508	2.32684
2003	10	13	2.15093	2.20156
2003	10	14	2.1802	2.17391
2003	10	15	2.57941	2.51234
2003	10	16	2.56275	2.47779
2003	10	17	2.32908	2.25216
2003	10	18	2.20754	2.12833
2003	10	19	2.3464	2.16608
2003	10	20	1.7653	1.81148
2003	10	21	2.16522	2.07486
2003	10	22	2.31663	2.14656
2003	10	23	2.34485	2.21895
2003	10	24	1.3318	1.39588
2003	10	25	2.32863	2.11295
2003	10	26	2.21604	1.98092
2003	10	27	2.88107	2.83799
2003	10	28	2.18053	2.05671
2003	10	29	2.85064	2.87199
2003	10	30	1.92755	1.9119
2003	10	31	1.09281	0.901856
2004	4	1	2.84828	2.9297
2004	4	2	3.37588	3.37115
2004	4	3	4.36403	4.43566
2004	4	4	4.63157	4.83576
2004	4	5	3.59668	3.60639
2004	4	6	2.33255	2.5232
2004	4	7	3.13591	3.19949
2004	4	8	3.03496	3.03281
2004	4	9	2.94592	3.00628
2004	4	10	3.92287	3.90843
2004	4	11	4.14743	3.96105
2004	4	12	3.96777	3.94319
2004	4	13	3.5513	3.58973
2004	4	14	2.98263	3.15324
2004	4	15	3.88941	3.65896
2004	4	16	4.09688	4.16895
2004	4	17	3.53945	3.51024
2004	4	18	1.88467	1.62017
2004	4	19	3.55907	3.67218
2004	4	20	3.2201	2.99138
2004	4	21	1.67218	1.3051
2004	4	22	3.40148	3.19388
2004	4	23	2.50126	2.56773
2004	4	24	3.15767	3.03731
2004	4	25	3.38596	3.24242
2004	4	26	4.30409	4.21538
2004	4	27	5.35956	5.29978
2004	4	28	4.05195	3.95551
2004	4	29	4.43454	4.41352
2004	4	30	2.94375	2.73672
2004	5	1	4.40873	3.7965
2004	5	2	3.29469	3.56917
2004	5	3	3.11187	2.84516
2004	5	4	3.58126	3.36377
2004	5	5	3.80466	3.64407
2004	5	6	4.03645	3.78425
2004	5	7	4.91657	4.60659
2004	5	8	3.55297	3.11332
2004	5	9	4.06817	3.59026
2004	5	10	6.27432	5.95142
2004	5	11	3.35647	3.025
2004	5	12	4.51998	3.88778
2004	5	13	4.73828	4.22465
2004	5	14	4.15341	3.97434
2004	5	15	3.57107	3.17949
2004	5	16	4.36121	3.98997
2004	5	17	3.52963	2.68841
2004	5	18	4.76012	4.22434
2004	5	19	3.97757	3.6808
2004	5	20	4.84824	4.7613
2004	5	21	4.96628	4.68892
2004	5	22	4.63728	4.37355
2004	5	23	4.53979	4.337
2004	5	24	4.98904	4.44895
2004	5	25	4.74371	4.4818
2004	5	26	4.73697	4.51651
2004	5	27	4.53101	4.40731
2004	5	28	4.85209	4.576
2004	5	29	4.83389	4.25154
2004	5	30	4.89748	4.56051
2004	5	31	4.10101	3.61743
2004	6	1	4.81344	4.17014
2004	6	2	4.48357	3.94516
2004	6	3	4.86514	4.34686
2004	6	4	5.05051	4.60341
2004	6	5	5.25581	4.78592
2004	6	6	5.54364	4.89911
2004	6	7	5.62583	5.0586
2004	6	8	5.03524	4.3531
2004	6	9	5.3963	4.8826
2004	6	10	5.4277	5.19806
2004	6	11	5.63099	5.26073
2004	6	12	5.49344	5.1128
2004	6	13	5.4666	5.13054
2004	6	14	5.58351	5.06913
2004	6	15	5.77665	5.24307
2004	6	16	5.47169	4.85636
2004	6	17	5.55949	4.90701
2004	6	18	5.47621	4.92615
2004	6	19	5.00525	4.30464
2004	6	20	5.50383	5.12719
2004	6	21	5.25934	4.56553
2004	6	22	4.79293	4.31993
2004	6	23	4.32641	4.17248
2004	6	24	4.93534	4.64124
2004	6	25	4.84279	4.54733
2004	6	26	5.20907	4.95063
2004	6	27	5.5682	5.32793
2004	6	28	5.65887	5.23187
2004	6	29	6.14566	6.00069
2004	6	30	5.66177	5.38292
2004	7	1	5.64841	5.20188
2004	7	2	5.78975	5.57544
2004	7	3	5.75454	5.33506
2004	7	4	5.5206	5.26054
2004	7	5	5.80736	5.5344
2004	7	6	6.08263	5.75361
2004	7	7	6.17253	5.57937
2004	7	8	5.92721	5.21603
2004	7	9	4.73307	4.36678
2004	7	10	5.93095	5.6467
2004	7	11	5.97017	5.67838
2004	7	12	5.55402	5.1478
2004	7	13	5.7948	5.24597
2004	7	14	5.57827	4.61886
2004	7	15	6.07715	5.69289
2004	7	16	5.55123	4.85597
2004	7	17	5.77835	5.46293
2004	7	18	5.7504	5.34573
2004	7	19	5.83102	5.57853
2004	7	20	5.75523	5.36121
2004	7	21	5.69163	5.04865
2004	7	22	5.72786	5.28247
2004	7	23	5.86217	5.34559
2004	7	24	5.49373	4.98856
2004	7	25	5.36071	4.85871
2004	7	26	4.78742	4.37658
2004	7	27	4.8303	4.17411
2004	7	28	4.79235	4.09475
2004	7	29	5.46523	4.76613
2004	7	30	5.6832	4.88448
2004	7	31	5.57065	4.67656
2004	8	1	4.06705	4.19839
2004	8	2	5.08848	4.6071
2004	8	3	4.91137	4.2743
2004	8	4	4.99457	4.48312
2004	8	5	5.03124	4.26912
2004	8	6	5.13558	4.34
2004	8	7	4.59026	4.11036
2004	8	8	4.10986	3.97043
2004	8	9	4.78546	4.33918
2004	8	10	4.02331	3.83328
2004	8	11	4.32714	3.86332
2004	8	12	5.3073	4.99379
2004	8	13	5.31694	4.99371
2004	8	14	5.27794	4.98959
2004	8	15	5.09324	4.52236
2004	8	16	5.10618	4.37666
2004	8	17	4.93574	4.34923
2004	8	18	5.06055	4.54891
2004	8	19	5.24507	4.44587
2004	8	20	5.1888	4.60074
2004	8	21	5.24585	4.47626
2004	8	22	5.17632	4.61037
2004	8	23	4.94292	4.27766
2004	8	24	5.26069	4.56685
2004	8	25	5.24455	4.77129
2004	8	26	5.29077	4.8437
2004	8	27	5.49581	4.74284
2004	8	28	5.14213	4.37813
2004	8	29	4.82755	4.22415
2004	8	30	4.50993	4.21399
2004	8	31	4.24515	4.01077
2004	9	1	4.09606	3.80732
2004	9	2	3.91219	3.7648
2004	9	3	4.29887	4.1268
2004	9	4	4.24182	4.00992
2004	9	5	4.09278	4.03029
2004	9	6	4.58973	4.55292
2004	9	7	4.13049	4.08527
2004	9	8	3.87651	3.82541
2004	9	9	4.21286	4.05972
2004	9	10	3.86848	3.69105
2004	9	11	4.53745	4.49116
2004	9	12	5.95279	5.99708
2004	9	13	3.76821	3.71055
2004	9	14	3.85661	3.80109
2004	9	15	3.72386	3.7376
2004	9	16	3.98553	3.80884
2004	9	17	3.79579	3.6277
2004	9	18	3.86566	3.79081
2004	9	19	3.76687	3.54032
2004	9	20	3.83913	3.63537
2004	9	21	3.78971	3.62957
2004	9	22	3.9053	3.39737
2004	9	23	3.76802	3.22833
2004	9	24	3.68392	3.40301
2004	9	25	3.76178	3.38769
2004	9	26	3.71529	3.28832
2004	9	27	3.70974	3.26196
2004	9	28	3.73596	3.34264
2004	9	29	3.77267	3.38194
2004	9	30	3.71029	3.25503
2004	10	1	2.87271	2.85413
2004	10	2	3.13768	3.28062
2004	10	3	2.5598	2.49704
2004	10	4	2.5549	2.58601
2004	10	5	3.50038	3.55262
2004	10	6	2.63737	2.45916
2004	10	7	2.34045	2.11594
2004	10	8	2.75623	2.71597
2004	10	9	2.50022	2.50405
2004	10	10	2.64863	2.66027
2004	10	11	2.67525	2.66019
2004	10	12	3.08634	3.03876
2004	10	13	2.61976	2.57017
2004	10	14	2.61833	2.58091
2004	10	15	2.67638	2.55292
2004	10	16	2.44592	2.2935
2004	10	17	2.56457	2.49451
2004	10	18	2.74763	2.63693
2004	10	19	2.7679	2.59633
2004	10	20	2.51838	2.42976
2004	10	21	2.93752	2.76972
2004	10	22	2.35885	2.29695
2004	10	23	2.50193	2.41178
2004	10	24	2.97651	2.85332
2004	10	25	3.34596	3.22765
2004	10	26	3.46891	3.31578
2004	10	27	3.52861	3.49123
2004	10	28	3.11167	2.94075
2004	10	29	2.83693	2.73991
2004	10	30	2.32835	2.03899
2004	10	31	2.65074	2.49222
2005	4	1	3.53703	3.53152
2005	4	2	2.13938	2.18641
2005	4	3	1.94719	1.7393
2005	4	4	2.44964	2.60093
2005	4	5	3.53341	3.48102
2005	4	6	3.72554	3.74359
2005	4	7	3.58852	3.64914
2005	4	8	4.75847	4.78107
2005	4	9	4.42316	4.38098
2005	4	10	3.9641	3.8563
2005	4	11	4.40159	4.40107
2005	4	12	4.21788	4.10114
2005	4	13	5.40694	5.21614
2005	4	14	3.94283	3.97971
2005	4	15	3.55312	3.38203
2005	4	16	2.88087	2.7218
2005	4	17	3.01499	2.98636
2005	4	18	1.98062	1.74854
2005	4	19	3.53722	3.28977
2005	4	20	3.43338	3.35396
2005	4	21	3.63114	3.63706
2005	4	22	2.08577	1.57898
2005	4	23	3.23222	3.30563
2005	4	24	4.29975	4.17024
2005	4	25	4.03244	3.85272
2005	4	26	4.06832	3.83784
2005	4	27	3.50886	3.42226
2005	4	28	3.88676	3.69732
2005	4	29	3.3495	3.53528
2005	4	30	2.68155	2.55861
2005	5	1	2.7956	2.8128
2005	5	2	4.0272	3.73506
2005	5	3	4.41497	4.1671
2005	5	4	4.45105	4.14827
2005	5	5	4.49686	4.29405
2005	5	6	2.45163	2.09436
2005	5	7	4.21688	3.83754
2005	5	8	3.98177	3.45264
2005	5	9	4.37434	3.68054
2005	5	10	4.67846	4.39703
2005	5	11	5.04762	4.77312
2005	5	12	5.0811	4.68206
2005	5	13	3.66599	3.39873
2005	5	14	4.86389	4.77669
2005	5	15	5.05998	4.72993
2005	5	16	3.43706	3.56301
2005	5	17	4.92455	4.65547
2005	5	18	5.36205	5.10538
2005	5	19	5.57213	5.08936
2005	5	20	5.27539	4.88349
2005	5	21	4.34075	4.26696
2005	5	22	4.97012	4.8262
2005	5	23	4.70469	4.28684
2005	5	24	4.84787	4.17917
2005	5	25	4.42753	3.90351
2005	5	26	4.66602	4.17682
2005	5	27	5.32622	5.07035
2005	5	28	4.44477	4.04735
2005	5	29	3.10559	3.10672
2005	5	30	2.86007	2.76038
2005	5	31	3.00786	2.67948
2005	6	1	2.53753	2.36364
2005	6	2	4.10768	3.93141
2005	6	3	4.42517	4.27551
2005	6	4	4.37723	4.30083
2005	6	5	5.2818	4.86901
2005	6	6	5.40738	4.76881
2005	6	7	5.65151	5.08581
2005	6	8	5.79284	5.17476
2005	6	9	5.25344	4.77693
2005	6	10	3.35953	2.97982
2005	6	11	4.15266	4.05965
2005	6	12	5.09146	4.28914
2005	6	13	5.06723	4.54264
2005	6	14	5.5615	5.12276
2005	6	15	4.88704	4.24302
2005	6	16	5.52351	5.02778
2005	6	17	5.99453	5.41218
2005	6	18	5.79742	5.10717
2005	6	19	5.16767	4.6277
2005	6	20	4.93439	4.65255
2005	6	21	4.23652	3.95462
2005	6	22	5.58448	5.16341
2005	6	23	6.15534	5.87348
2005	6	24	5.72783	5.37508
2005	6	25	5.59225	5.20871
2005	6	26	5.85047	5.39897
2005	6	27	5.90837	5.59125
2005	6	28	5.89927	5.36748
2005	6	29	5.5435	4.93239
2005	6	30	5.20612	4.49837
2005	7	1	5.55753	5.02707
2005	7	2	5.13137	4.44972
2005	7	3	4.51304	4.37349
2005	7	4	5.5929	4.90506
2005	7	5	4.95841	4.31745
2005	7	6	5.2941	4.79511
2005	7	7	5.4143	4.74117
2005	7	8	5.52974	4.90545
2005	7	9	5.62273	5.11431
2005	7	10	5.40012	4.99024
2005	7	11	5.67247	5.1262
2005	7	12	5.57913	5.22272
2005	7	13	5.41098	4.94527
2005	7	14	3.91638	4.19603
2005	7	15	5.51631	4.70121
2005	7	16	5.13523	4.76058
2005	7	17	5.77711	5.30206
2005	7	18	5.82025	5.28395
2005	7	19	5.9496	5.43091
2005	7	20	5.92927	5.4627
2005	7	21	5.96664	5.37314
2005	7	22	5.65324	4.92728
2005	7	23	5.30949	4.6205
2005	7	24	5.43152	4.56665
2005	7	25	4.80205	4.43228
2005	7	26	5.05808	4.62655
2005	7	27	5.74869	5.10427
2005	7	28	5.38348	4.85798
2005	7	29	5.50038	4.75519
2005	7	30	4.22194	3.99932
2005	7	31	3.7073	3.67164
2005	8	1	4.52664	4.24391
2005	8	2	4.26521	3.76002
2005	8	3	5.26519	4.92082
2005	8	4	5.49761	5.04883
2005	8	5	5.2893	4.52673
2005	8	6	5.5992	4.85738
2005	8	7	5.51332	5.03531
2005	8	8	5.66247	4.72425
2005	8	9	5.18184	4.77167
2005	8	10	5.31212	4.42151
2005	8	11	5.55535	4.65816
2005	8	12	5.58345	4.88635
2005	8	13	5.21445	4.94557
2005	8	14	5.44712	5.08021
2005	8	15	5.38929	4.88985
2005	8	16	5.29162	4.64022
2005	8	17	5.46558	4.45092
2005	8	18	5.53218	4.77194
2005	8	19	5.22876	4.6122
2005	8	20	5.03961	4.10392
2005	8	21	5.17736	4.31343
2005	8	22	5.32017	4.75291
2005	8	23	5.32541	4.77057
2005	8	24	4.98195	4.36268
2005	8	25	5.06942	4.43033
2005	8	26	5.34907	4.35501
2005	8	27	4.95938	4.67585
2005	8	28	5.10292	4.41605
2005	8	29	5.19275	4.51598
2005	8	30	5.21708	4.81843
2005	8	31	5.55008	5.43926
2005	9	1	4.62049	4.41663
2005	9	2	4.09944	3.77097
2005	9	3	3.4836	3.3926
2005	9	4	3.58144	3.43963
2005	9	5	4.78667	4.84138
2005	9	6	4.4091	4.40752
2005	9	7	4.10769	3.98525
2005	9	8	4.11686	3.98128
2005	9	9	3.69004	3.79568
2005	9	10	4.03184	3.86025
2005	9	11	3.89461	3.84487
2005	9	12	4.11923	3.94197
2005	9	13	4.2515	3.9845
2005	9	14	4.02204	3.76303
2005	9	15	3.99755	3.6269
2005	9	16	3.7983	3.42015
2005	9	17	3.69573	3.35183
2005	9	18	3.78669	3.42521
2005	9	19	4.04288	3.68431
2005	9	20	3.71236	3.52472
2005	9	21	4.06475	3.44834
2005	9	22	4.11551	3.76797
2005	9	23	3.87004	3.3968
2005	9	24	3.67759	3.26155
2005	9	25	3.46265	3.40224
2005	9	26	3.70975	3.33959
2005	9	27	3.56576	3.34034
2005	9	28	3.00258	2.71393
2005	9	29	2.33034	2.00378
2005	9	30	3.40058	3.12147
2005	10	1	2.79791	2.79708
2005	10	2	2.50063	2.50998
2005	10	3	2.58735	2.55539
2005	10	4	2.63364	2.72305
2005	10	5	3.20475	3.27036
2005	10	6	2.47982	2.51647
2005	10	7	2.42879	2.50286
2005	10	8	2.79366	2.8312
2005	10	9	2.26436	2.2592
2005	10	10	2.73818	2.73184
2005	10	11	2.21058	2.11775
2005	10	12	2.7632	2.54992
2005	10	13	2.29573	2.26006
2005	10	14	2.54609	2.5413
2005	10	15	2.65037	2.44921
2005	10	16	1.89708	1.70925
2005	10	17	2.46376	2.39205
2005	10	18	1.83369	1.65467
2005	10	19	1.64375	1.54898
2005	10	20	2.54905	2.5214
2005	10	21	2.16307	2.17633
2005	10	22	2.68635	2.69797
2005	10	23	2.69793	2.69943
2005	10	24	2.57519	2.53864
2005	10	25	2.53021	2.46983
2005	10	26	2.33378	2.27687
2005	10	27	2.34953	2.21363
2005	10	28	2.26452	2.04464
2005	10	29	2.4544	2.31135
2005	10	30	3.30687	3.30167
2005	10	31	1.98424	1.90645
2006	4	1	2.62326	2.75636
2006	4	2	1.75255	1.30021
2006	4	3	3.45355	3.22873
2006	4	4	2.82848	2.81344
2006	4	5	2.03045	2.15708
2006	4	6	3.18929	2.85948
2006	4	7	1.6889	1.31132
2006	4	8	2.34751	2.40407
2006	4	9	4.45446	4.31795
2006	4	10	2.27565	2.75191
2006	4	11	2.18629	2.80484
2006	4	12	1.76868	1.54354
2006	4	13	1.79694	1.74568
2006	4	14	2.88635	3.2609
2006	4	15	3.32347	3.42227
2006	4	16	3.13841	2.95427
2006	4	17	2.47565	2.1686
2006	4	18	1.93929	2.02123
2006	4	19	3.36415	3.23245
2006	4	20	2.14201	2.08584
2006	4	21	2.82292	2.686
2006	4	22	2.91629	2.63664
2006	4	23	4.78379	4.43176
2006	4	24	2.12948	1.69509
2006	4	25	4.32231	4.48065
2006	4	26	5.10896	5.12457
2006	4	27	3.98677	3.73464
2006	4	28	2.6305	2.71432
2006	4	29	4.89637	4.46582
2006	4	30	3.33749	3.19683
2006	5	1	4.09308	3.65864
2006	5	2	3.73875	3.3341
2006	5	3	3.87973	3.59908
2006	5	4	4.5015	4.05389
2006	5	5	4.58636	3.74217
2006	5	6	4.31988	3.91591
2006	5	7	4.73224	4.27744
2006	5	8	5.16739	4.41856
2006	5	9	4.63603	4.01009
2006	5	10	4.24236	3.82659
2006	5	11	4.54702	3.93051
2006	5	12	4.82998	4.3841
2006	5	13	4.5024	4.14507
2006	5	14	5.01141	4.63984
2006	5	15	5.18045	4.82275
2006	5	16	4.73303	4.06377
2006	5	17	2.44761	1.95859
2006	5	18	4.37835	3.715
2006	5	19	4.56676	4.27776
2006	5	20	4.82244	4.4277
2006	5	21	4.32949	3.8992
2006	5	22	4.41503	4.12418
2006	5	23	4.78668	4.2883
2006	5	24	5.52188	5.14722
2006	5	25	5.84217	5.26407
2006	5	26	5.70758	5.09749
2006	5	27	4.96119	4.64269
2006	5	28	4.98506	4.54611
2006	5	29	5.3272	4.70326
2006	5	30	5.33522	4.71553
2006	5	31	5.57482	5.12061
2006	6	1	4.70171	4.18723
2006	6	2	5.11783	4.57206
2006	6	3	5.38711	4.58931
2006	6	4	5.48827	4.76791
2006	6	5	5.3455	4.66345
2006	6	6	5.7782	4.88012
2006	6	7	5.06695	4.6472
2006	6	8	4.93874	4.539
2006	6	9	5.5094	4.87548
2006	6	10	5.25554	4.79764
2006	6	11	5.33097	4.72279
2006	6	12	5.45113	4.77337
2006	6	13	5.13728	4.24388
2006	6	14	5.13868	4.38993
2006	6	15	5.34718	4.73192
2006	6	16	5.26313	4.57301
2006	6	17	5.48424	4.78335
2006	6	18	5.78455	5.13708
2006	6	19	5.84688	5.14249
2006	6	20	5.76158	5.04497
2006	6	21	5.71493	5.00706
2006	6	22	5.1853	4.47936
2006	6	23	5.14127	4.19186
2006	6	24	4.99812	4.58157
2006	6	25	5.41716	4.37191
2006	6	26	5.23365	4.53283
2006	6	27	4.62929	4.06517
2006	6	28	5.09897	4.48126
2006	6	29	3.82461	3.29135
2006	6	30	5.56436	4.43993
2006	7	1	5.59456	4.88943
2006	7	2	5.41823	4.86667
2006	7	3	4.67108	4.27635
2006	7	4	5.02282	4.12296
2006	7	5	4.6908	4.04286
2006	7	6	5.18977	4.52825
2006	7	7	4.95528	4.64129
2006	7	8	5.57939	5.0027
2006	7	9	5.69405	4.89278
2006	7	10	5.59262	4.71649
2006	7	11	5.40453	4.56961
2006	7	12	5.96002	4.94785
2006	7	13	5.45203	4.02385
2006	7	14	3.75101	3.78516
2006	7	15	5.25472	4.39966
2006	7	16	5.36928	4.7519
2006	7	17	5.10034	4.7087
2006	7	18	5.4018	4.9382
2006	7	19	5.56847	5.04274
2006	7	20	5.82014	5.23547
2006	7	21	5.37045	4.89071
2006	7	22	4.90496	4.68969
2006	7	23	5.11472	4.49569
2006	7	24	5.37759	4.55306
2006	7	25	5.57815	4.76202
2006	7	26	4.88502	4.59293
2006	7	27	5.0045	4.58788
2006	7	28	5.62	4.70448
2006	7	29	5.91182	5.17081
2006	7	30	5.64489	5.13462
2006	7	31	5.61519	4.75746
2006	8	1	4.79363	3.70155
2006	8	2	4.79958	4.34451
2006	8	3	4.81948	4.52237
2006	8	4	5.07291	4.34809
2006	8	5	5.03982	4.0246
2006	8	6	4.85454	4.63425
2006	8	7	3.46631	3.89184
2006	8	8	4.95386	4.12569
2006	8	9	5.20275	4.22441
2006	8	10	5.18596	4.46025
2006	8	11	4.68601	4.27274
2006	8	12	5.29023	4.43756
2006	8	13	5.04121	4.17695
2006	8	14	5.085	4.37501
2006	8	15	5.14394	4.42898
2006	8	16	5.19368	4.42331
2006	8	17	4.75917	4.10358
2006	8	18	5.20432	4.50104
2006	8	19	4.70362	4.34792
2006	8	20	5.49404	4.82157
2006	8	21	5.63171	4.71776
2006	8	22	5.2214	4.63438
2006	8	23	5.24781	4.5866
2006	8	24	5.18836	4.40482
2006	8	25	4.81298	4.1965
2006	8	26	4.94976	4.1408
2006	8	27	4.7106	4.07479
2006	8	28	4.24559	3.77646
2006	8	29	5.1958	4.04853
2006	8	30	5.05669	4.41592
2006	8	31	4.63589	4.00916
2006	9	1	4.36162	4.02728
2006	9	2	3.85931	3.56987
2006	9	3	4.23109	3.88211
2006	9	4	4.34435	4.03276
2006	9	5	4.59756	4.43215
2006	9	6	4.29001	4.09067
2006	9	7	4.6451	4.55303
2006	9	8	4.17049	4.01186
2006	9	9	4.17102	3.90415
2006	9	10	3.8662	3.75003
2006	9	11	3.81907	3.6737
2006	9	12	3.91362	3.82066
2006	9	13	4.36599	4.22516
2006	9	14	3.92275	3.72833
2006	9	15	3.86012	3.67658
2006	9	16	3.89747	3.70807
2006	9	17	4.04655	3.87539
2006	9	18	3.84591	3.63578
2006	9	19	3.77317	3.42965
2006	9	20	4.01333	3.59311
2006	9	21	3.86338	3.37526
2006	9	22	2.91267	2.488
2006	9	23	3.02441	2.62585
2006	9	24	3.81575	3.42699
2006	9	25	1.90772	1.7188
2006	9	26	3.25754	3.01052
2006	9	27	3.63562	3.36888
2006	9	28	3.47154	3.02835
2006	9	29	2.17247	1.81639
2006	9	30	4.05634	3.49886
2006	10	1	2.41044	2.25355
2006	10	2	2.7445	2.71782
2006	10	3	2.79131	2.80439
2006	10	4	2.64962	2.67124
2006	10	5	2.84311	2.79674
2006	10	6	2.6311	2.59554
2006	10	7	2.63553	2.57476
2006	10	8	2.56005	2.47708
2006	10	9	2.62355	2.51622
2006	10	10	2.48127	2.34815
2006	10	11	2.51017	2.40451
2006	10	12	2.53339	2.43372
2006	10	13	2.45587	2.36718
2006	10	14	1.9673	2.0704
2006	10	15	1.73386	1.89906
2006	10	16	2.42002	2.31234
2006	10	17	1.56779	1.4479
2006	10	18	2.82094	2.69053
2006	10	19	2.90407	2.79183
2006	10	20	1.72762	1.63213
2006	10	21	2.35517	2.19557
2006	10	22	2.21812	2.07583
2006	10	23	2.28019	2.30914
2006	10	24	2.56601	2.36738
2006	10	25	2.40527	2.16965
2006	10	26	2.34389	2.09703
2006	10	27	2.75451	2.67266
2006	10	28	2.77622	2.63792
2006	10	29	1.64224	1.55673
2006	10	30	1.45348	1.35195
2006	10	31	1.99858	1.88982
2007	4	1	2.88585	2.67629
2007	4	2	2.69673	2.34337
2007	4	3	3.30724	3.13778
2007	4	4	3.27117	3.18716
2007	4	5	2.65284	2.36937
2007	4	6	2.85863	2.76001
2007	4	7	3.45915	3.22839
2007	4	8	3.63346	3.54639
2007	4	9	3.42357	3.42316
2007	4	10	3.16472	3.09639
2007	4	11	3.03428	3.44586
2007	4	12	2.40968	2.79605
2007	4	13	2.99547	3.47624
2007	4	14	2.8012	3.33368
2007	4	15	2.2084	1.88839
2007	4	16	3.04928	2.89014
2007	4	17	2.40809	2.1315
2007	4	18	3.61025	3.3883
2007	4	19	4.09396	3.8519
2007	4	20	3.67244	3.35241
2007	4	21	3.75932	3.42849
2007	4	22	3.75147	3.68291
2007	4	23	3.95542	4.03422
2007	4	24	5.15378	5.00589
2007	4	25	3.83188	3.62528
2007	4	26	3.34719	3.23934
2007	4	27	4.93911	4.63314
2007	4	28	3.93117	3.6025
2007	4	29	3.02441	2.74517
2007	4	30	3.94631	3.70345
2007	5	1	4.40593	3.62779
2007	5	2	4.26428	3.78939
2007	5	3	5.0087	4.49223
2007	5	4	5.48109	4.88894
2007	5	5	5.08473	4.32567
2007	5	6	5.66229	4.93332
2007	5	7	6.06193	5.40366
2007	5	8	4.74301	4.27562
2007	5	9	2.73208	2.62954
2007	5	10	2.42098	2.35344
2007	5	11	2.31161	1.51823
2007	5	12	2.3703	2.14777
2007	5	13	3.29336	2.94602
2007	5	14	4.25788	3.76519
2007	5	15	4.87537	4.2576
2007	5	16	4.62453	4.16407
2007	5	17	2.34882	2.3731
2007	5	18	2.13765	1.96422
2007	5	19	4.93807	4.38134
2007	5	20	5.46492	5.25933
2007	5	21	4.26848	3.81657
2007	5	22	4.88307	4.30204
2007	5	23	4.78621	4.22705
2007	5	24	5.11378	4.53353
2007	5	25	5.54219	4.83317
2007	5	26	4.6615	4.1658
2007	5	27	4.79668	4.35265
2007	5	28	4.84864	4.35049
2007	5	29	3.30997	3.69744
2007	5	30	5.49632	4.97604
2007	5	31	4.36327	4.2422
2007	6	1	4.88984	4.31502
2007	6	2	3.76213	3.76198
2007	6	3	4.89807	4.34815
2007	6	4	4.75337	3.77687
2007	6	5	5.03503	4.49834
2007	6	6	4.59312	4.34861
2007	6	7	5.4562	5.4638
2007	6	8	4.25351	4.1224
2007	6	9	3.49065	2.81097
2007	6	10	4.21135	3.65501
2007	6	11	4.15269	4.10636
[truncated: 2,711 more rows]

## Sheet: ETo(-Rs)-not measured n & Stati
Year	Month	Day	ETo-missing-Rs (not measured n, (RsT)	ETo-full data
#	#	#	mm/day	mm/day
1998	4	1	2.95497	2.74032
1998	4	2	2.78382	2.12095			RMSE, mm/day	MBE, mm/day	MAE, mm/day	RE	d
1998	4	3	2.73441	2.7115			0.552003	-0.158133	0.414037	0.13036	0.935931
1998	4	4	3.43816	3.40971
1998	4	5	3.25978	2.97971
1998	4	6	3.20853	3.09217
1998	4	7	3.29688	3.00852
1998	4	8	3.27192	3.08144
1998	4	9	3.42252	3.24399
1998	4	10	3.86069	3.19565
1998	4	11	4.08771	3.6759
1998	4	12	4.33589	4.0979
1998	4	13	4.48197	3.99706
1998	4	14	3.91103	3.31898
1998	4	15	3.43066	2.1991
1998	4	16	3.91474	3.91926
1998	4	17	2.56802	1.72878
1998	4	18	3.60012	3.51869
1998	4	19	3.01304	3.01571
1998	4	20	3.16639	3.17907
1998	4	21	3.30985	3.42363
1998	4	22	3.16608	2.86054
1998	4	23	3.10809	3.23816
1998	4	24	3.30921	3.36769
1998	4	25	3.12775	2.52586
1998	4	26	2.34169	1.57045
1998	4	27	2.25689	1.81772
1998	4	28	2.68958	2.72374
1998	4	29	2.87932	2.79605
1998	4	30	3.14457	3.08039
1998	5	1	3.80995	3.62705
1998	5	2	4.28574	3.60159
1998	5	3	4.20152	3.29516
1998	5	4	4.79066	4.28883
1998	5	5	4.91183	4.21028
1998	5	6	4.59747	3.30881
1998	5	7	3.8889	2.38763
1998	5	8	4.48192	3.70605
1998	5	9	4.87399	3.57096
1998	5	10	3.794	2.84752
1998	5	11	2.8247	3.23132
1998	5	12	3.6904	3.54937
1998	5	13	3.11905	3.00557
1998	5	14	2.89394	2.63219
1998	5	15	3.29597	3.30085
1998	5	16	3.7138	3.70953
1998	5	17	4.06696	2.63077
1998	5	18	3.70054	1.96566
1998	5	19	3.50991	3.31648
1998	5	20	3.14642	2.70039
1998	5	21	3.75587	3.67976
1998	5	22	3.06611	2.83079
1998	5	23	3.12811	2.88726
1998	5	24	3.90196	3.94708
1998	5	25	4.13798	4.18654
1998	5	26	4.35452	3.88993
1998	5	27	4.58791	3.80194
1998	5	28	4.56029	4.03916
1998	5	29	3.284	4.30259
1998	5	30	3.50246	3.87223
1998	5	31	3.29469	2.85622
1998	6	1	3.69996	4.05917
1998	6	2	3.73856	3.77364
1998	6	3	4.00028	3.66492
1998	6	4	4.50187	4.34613
1998	6	5	4.685	4.68956
1998	6	6	4.41722	4.37128
1998	6	7	4.15961	4.092
1998	6	8	4.15858	4.16576
1998	6	9	3.77702	3.65447
1998	6	10	3.97137	4.13359
1998	6	11	4.23546	4.3687
1998	6	12	3.94897	3.19814
1998	6	13	4.25291	4.70793
1998	6	14	4.72967	4.75514
1998	6	15	4.57293	4.75326
1998	6	16	3.847	4.35097
1998	6	17	4.85821	4.60282
1998	6	18	4.37148	4.10278
1998	6	19	4.57048	4.57929
1998	6	20	3.80806	3.17543
1998	6	21	3.59242	3.95576
1998	6	22	3.94645	4.37528
1998	6	23	4.05707	4.71393
1998	6	24	4.56513	4.70857
1998	6	25	4.78847	4.7761
1998	6	26	4.64672	4.71793
1998	6	27	4.35369	4.43791
1998	6	28	4.87513	4.68043
1998	6	29	4.76777	4.78025
1998	6	30	4.81229	4.9225
1998	7	1	4.4503	4.88838
1998	7	2	4.40501	4.83581
1998	7	3	5.29616	5.23286
1998	7	4	4.87076	5.03514
1998	7	5	3.29186	4.16164
1998	7	6	3.77573	3.27821
1998	7	7	4.07828	4.07609
1998	7	8	4.07244	4.27676
1998	7	9	4.12914	4.24753
1998	7	10	4.02918	4.78799
1998	7	11	4.22268	4.79299
1998	7	12	4.44432	4.86931
1998	7	13	4.5346	4.86279
1998	7	14	4.60037	4.86661
1998	7	15	4.53295	4.76198
1998	7	16	4.02045	4.20147
1998	7	17	3.96793	4.16327
1998	7	18	3.9032	4.29616
1998	7	19	4.11948	4.65753
1998	7	20	4.17556	4.52982
1998	7	21	4.40084	4.41038
1998	7	22	4.91388	4.56028
1998	7	23	5.31819	4.59775
1998	7	24	3.99896	3.43404
1998	7	25	3.64001	2.8483
1998	7	26	3.61013	3.681
1998	7	27	4.00582	3.84385
1998	7	28	4.2924	4.50138
1998	7	29	4.14799	4.44112
1998	7	30	4.14982	4.18523
1998	7	31	3.86466	3.90703
1998	8	1	3.68244	3.98641
1998	8	2	3.73486	4.24335
1998	8	3	3.9406	4.21297
1998	8	4	3.97745	4.08808
1998	8	5	4.51574	4.29983
1998	8	6	4.69634	4.21813
1998	8	7	4.76794	4.10563
1998	8	8	4.24269	4.14009
1998	8	9	4.47169	4.09314
1998	8	10	4.60571	4.37034
1998	8	11	4.10409	4.1518
1998	8	12	4.10124	4.25506
1998	8	13	4.23491	4.23917
1998	8	14	4.24245	4.14241
1998	8	15	4.34291	3.98341
1998	8	16	4.29341	4.28676
1998	8	17	4.26398	3.8303
1998	8	18	4.30585	4.04083
1998	8	19	4.00172	4.03215
1998	8	20	3.99495	4.14786
1998	8	21	3.93954	4.12475
1998	8	22	3.98236	3.98336
1998	8	23	3.94703	3.89594
1998	8	24	4.29055	3.87157
1998	8	25	4.12979	3.61109
1998	8	26	4.06477	3.40043
1998	8	27	4.04132	3.49473
1998	8	28	3.74202	3.40567
1998	8	29	3.67942	3.38292
1998	8	30	3.67709	3.25851
1998	8	31	3.79259	3.18417
1998	9	1	3.19095	3.32426
1998	9	2	3.03572	3.53744
1998	9	3	3.09548	3.20326
1998	9	4	2.97877	2.94821
1998	9	5	3.2266	3.12055
1998	9	6	3.18246	3.2588
1998	9	7	3.12362	3.08034
1998	9	8	3.26156	3.02103
1998	9	9	3.53894	3.08539
1998	9	10	3.28999	3.12641
1998	9	11	3.38894	3.17911
1998	9	12	3.07875	2.9102
1998	9	13	3.17374	2.58751
1998	9	14	3.10994	3.07473
1998	9	15	2.98932	2.72175
1998	9	16	2.99674	2.96048
1998	9	17	3.00599	2.96109
1998	9	18	3.06125	3.00306
1998	9	19	2.89473	2.65451
1998	9	20	2.9139	2.8131
1998	9	21	2.8058	2.69085
1998	9	22	2.71676	2.44217
1998	9	23	2.38761	2.09179
1998	9	24	2.7522	2.54536
1998	9	25	3.05491	2.67062
1998	9	26	2.88427	2.52097
1998	9	27	3.02072	2.51857
1998	9	28	3.09083	2.57165
1998	9	29	3.22992	2.65635
1998	9	30	3.2624	2.83603
1998	10	1	3.09141	3.21431
1998	10	2	2.12256	2.14163
1998	10	3	2.13588	2.08954
1998	10	4	2.22054	2.22411
1998	10	5	2.21984	2.25717
1998	10	6	2.23565	2.16295
1998	10	7	2.14415	2.10569
1998	10	8	3.41179	3.36281
1998	10	9	4.92461	4.92998
1998	10	10	2.34999	2.25836
1998	10	11	2.03321	1.86237
1998	10	12	2.59475	2.4295
1998	10	13	3.63096	3.43373
1998	10	14	2.99566	2.91891
1998	10	15	2.45931	2.38487
1998	10	16	2.09764	2.11101
1998	10	17	2.70594	2.70931
1998	10	18	2.29623	2.32329
1998	10	19	1.9823	1.80462
1998	10	20	2.04856	1.82445
1998	10	21	2.19092	1.91375
1998	10	22	2.07897	1.77961
1998	10	23	2.15937	1.92421
1998	10	24	1.94687	1.61982
1998	10	25	2.20512	1.94455
1998	10	26	1.94552	1.64281
1998	10	27	1.85384	1.52408
1998	10	28	1.47833	0.998312
1998	10	29	2.25125	2.27589
1998	10	30	1.82974	1.62723
1998	10	31	1.87037	1.61344
1999	4	1	2.74161	2.74429
1999	4	2	2.93275	2.93531
1999	4	3	2.41587	2.05916
1999	4	4	2.825	2.82063
1999	4	5	3.0066	2.54663
1999	4	6	3.4802	3.00976
1999	4	7	2.34548	1.44237
1999	4	8	2.96227	3.13267
1999	4	9	3.19883	3.08318
1999	4	10	2.87488	2.7143
1999	4	11	3.10564	2.97943
1999	4	12	2.51303	1.29144
1999	4	13	3.13427	3.21721
1999	4	14	2.89518	3.00448
1999	4	15	3.2121	3.61892
1999	4	16	3.35921	3.81686
1999	4	17	3.25359	3.35977
1999	4	18	3.45906	3.19844
1999	4	19	3.2837	3.60617
1999	4	20	3.12448	2.79159
1999	4	21	2.70373	2.84647
1999	4	22	3.54251	4.09525
1999	4	23	3.38634	3.8604
1999	4	24	3.61948	3.41976
1999	4	25	3.95434	4.23201
1999	4	26	4.22985	4.17961
1999	4	27	3.67016	4.36974
1999	4	28	3.3927	3.98304
1999	4	29	3.24983	3.47763
1999	4	30	3.64485	4.14429
1999	5	1	4.49544	4.06634
1999	5	2	4.61838	4.37638
1999	5	3	4.52363	4.57585
1999	5	4	4.51094	4.63627
1999	5	5	4.78171	4.54521
1999	5	6	4.86673	4.72414
1999	5	7	4.00719	3.61626
1999	5	8	4.1526	4.57145
1999	5	9	3.7278	3.85949
1999	5	10	4.19575	4.39409
1999	5	11	4.26386	4.45045
1999	5	12	4.63043	4.44969
1999	5	13	4.03973	4.33985
1999	5	14	3.63013	3.88814
1999	5	15	4.3372	4.15395
1999	5	16	4.43318	4.54897
1999	5	17	3.90251	4.40331
1999	5	18	4.12501	4.22811
1999	5	19	4.5278	4.71097
1999	5	20	6.61398	6.94367
1999	5	21	4.564	4.46551
1999	5	22	4.75461	4.44944
1999	5	23	5.2807	4.8167
1999	5	24	4.95907	5.13201
1999	5	25	3.80022	5.10375
1999	5	26	3.30439	2.57421
1999	5	27	4.47202	4.58211
1999	5	28	4.69319	4.7543
1999	5	29	4.46146	4.52086
1999	5	30	4.10676	4.62624
1999	5	31	4.31833	4.86613
1999	6	1	4.6725	4.87181
1999	6	2	4.87507	5.06725
1999	6	3	4.92098	5.13605
1999	6	4	4.61814	4.85821
1999	6	5	4.18437	5.10476
1999	6	6	4.39433	4.7682
1999	6	7	4.58966	5.21998
1999	6	8	4.44943	5.03481
1999	6	9	4.43112	4.84037
1999	6	10	4.44174	4.81498
1999	6	11	3.89427	3.71829
1999	6	12	4.51018	4.80763
1999	6	13	4.73618	4.58811
1999	6	14	3.93936	3.20425
1999	6	15	4.44002	4.5665
1999	6	16	4.60376	4.95011
1999	6	17	4.8787	5.41882
1999	6	18	4.67032	5.5327
1999	6	19	4.60179	5.27686
1999	6	20	4.37734	5.42484
1999	6	21	4.60328	5.17223
1999	6	22	4.09274	4.7595
1999	6	23	4.10647	5.12882
1999	6	24	4.31916	4.70103
1999	6	25	4.37661	5.04808
1999	6	26	4.33894	4.41492
1999	6	27	4.37902	4.63808
1999	6	28	4.66392	4.66811
1999	6	29	4.52773	5.56526
1999	6	30	4.88915	5.43392
1999	7	1	4.0642	5.48408
1999	7	2	4.06267	4.71909
1999	7	3	4.12784	4.6185
1999	7	4	4.0285	5.13198
1999	7	5	4.30849	5.18473
1999	7	6	4.31744	5.38275
1999	7	7	4.58783	5.52007
1999	7	8	4.38631	4.90379
1999	7	9	4.27465	5.50193
1999	7	10	4.43443	5.71504
1999	7	11	4.3956	5.78041
1999	7	12	4.68241	5.89731
1999	7	13	4.62925	5.62847
1999	7	14	4.63157	5.58003
1999	7	15	4.42346	4.99788
1999	7	16	4.30652	3.9637
1999	7	17	4.72637	4.89905
1999	7	18	4.29215	4.96996
1999	7	19	4.40334	5.15062
1999	7	20	4.49287	5.52974
1999	7	21	4.67354	5.76884
1999	7	22	5.21344	5.58686
1999	7	23	4.51981	5.14532
1999	7	24	4.34238	5.51501
1999	7	25	4.61063	5.49964
1999	7	26	4.009	4.18713
1999	7	27	3.92374	4.39678
1999	7	28	3.927	4.8573
1999	7	29	3.98074	5.10895
1999	7	30	4.04106	4.41928
1999	7	31	4.24942	4.23597
1999	8	1	3.82286	4.66775
1999	8	2	3.85755	4.37055
1999	8	3	3.53574	4.45862
1999	8	4	3.79439	4.42042
1999	8	5	3.69086	4.51388
1999	8	6	3.80858	4.62172
1999	8	7	4.35692	5.08391
1999	8	8	4.15547	4.93861
1999	8	9	3.95288	4.68245
1999	8	10	3.96991	4.3802
1999	8	11	4.18286	4.36222
1999	8	12	4.06717	4.94573
1999	8	13	4.32782	5.07655
1999	8	14	4.2686	4.98144
1999	8	15	3.92324	4.3247
1999	8	16	3.89041	4.16255
1999	8	17	4.08072	4.2336
1999	8	18	4.28845	4.35994
1999	8	19	4.8229	4.95661
1999	8	20	4.20029	4.28404
1999	8	21	3.99516	3.8248
1999	8	22	3.89228	3.97582
1999	8	23	3.68771	3.48823
1999	8	24	3.91288	4.03244
1999	8	25	4.11622	4.32928
1999	8	26	3.97826	4.48733
1999	8	27	4.1502	4.5282
1999	8	28	4.53695	5.10568
1999	8	29	4.36951	4.53118
1999	8	30	4.25334	4.36339
1999	8	31	4.0627	4.66558
1999	9	1	3.37128	4.19153
1999	9	2	3.23209	3.95688
1999	9	3	3.31133	4.40916
1999	9	4	3.33636	3.83658
1999	9	5	3.05206	3.96049
1999	9	6	3.15339	3.65806
1999	9	7	3.30743	3.61916
1999	9	8	3.30355	3.93489
1999	9	9	3.22738	3.48499
1999	9	10	3.17994	3.4373
1999	9	11	3.16104	3.82892
1999	9	12	2.99759	2.21081
1999	9	13	3.05034	3.19168
1999	9	14	2.9696	3.03059
1999	9	15	3.00716	2.84909
1999	9	16	3.05239	3.50099
1999	9	17	3.1836	3.42056
1999	9	18	3.32068	3.32453
1999	9	19	3.34771	3.72573
1999	9	20	2.92662	3.07226
1999	9	21	3.32907	3.41931
1999	9	22	3.20261	3.41287
1999	9	23	3.15495	3.09536
1999	9	24	3.34853	3.15393
1999	9	25	3.14253	3.17268
1999	9	26	3.25558	3.42187
1999	9	27	3.17283	3.06821
1999	9	28	3.27752	3.03709
1999	9	29	3.54137	3.28872
1999	9	30	4.34977	4.16677
1999	10	1	2.74037	2.88109
1999	10	2	2.26598	2.62288
1999	10	3	2.26332	2.67829
1999	10	4	2.22782	2.64881
1999	10	5	2.25075	2.67231
1999	10	6	2.18988	2.4658
1999	10	7	2.09844	2.19778
1999	10	8	2.0618	2.35027
1999	10	9	1.8461	1.63327
1999	10	10	2.08892	2.34846
1999	10	11	1.93793	1.92525
1999	10	12	3.04017	3.23339
1999	10	13	2.20849	2.40093
1999	10	14	2.00037	2.09874
1999	10	15	2.20373	2.25406
1999	10	16	2.22246	2.328
1999	10	17	2.07867	2.21236
1999	10	18	2.07527	2.23611
1999	10	19	2.10055	2.16295
1999	10	20	2.12492	2.22651
1999	10	21	2.07374	2.16905
1999	10	22	2.19062	2.23718
1999	10	23	1.76714	1.45379
1999	10	24	2.19135	2.27819
1999	10	25	1.9262	1.56294
1999	10	26	2.03598	2.05384
1999	10	27	1.803	1.71744
1999	10	28	2.15751	2.09963
1999	10	29	2.23972	2.30175
1999	10	30	2.22144	2.17241
1999	10	31	3.56155	3.76474
2000	4	1	3.3328	2.73968
2000	4	2	4.59502	4.30299
2000	4	3	2.90864	2.94107
2000	4	4	2.88565	2.49095
2000	4	5	3.15128	2.21264
2000	4	6	3.34854	3.34009
2000	4	7	2.97849	3.3978
2000	4	8	3.04037	3.07515
2000	4	9	2.21896	1.75199
2000	4	10	2.98659	3.21447
2000	4	11	2.84005	2.24428
2000	4	12	3.6935	3.09944
2000	4	13	4.02359	3.38433
2000	4	14	2.78977	2.88831
2000	4	15	2.76143	2.86629
2000	4	16	3.57423	3.46448
2000	4	17	4.44083	4.02944
2000	4	18	4.38779	4.52404
2000	4	19	3.11382	2.91399
2000	4	20	2.00363	1.28895
2000	4	21	2.47169	2.1727
2000	4	22	1.99647	1.72482
2000	4	23	2.4766	2.4681
2000	4	24	2.38938	2.27408
2000	4	25	2.83585	2.99893
2000	4	26	3.05697	3.73798
2000	4	27	3.82084	4.10551
2000	4	28	2.46863	1.38814
2000	4	29	2.63872	2.19522
2000	4	30	2.9135	2.84599
2000	5	1	3.79528	4.07173
2000	5	2	3.94379	3.51992
2000	5	3	3.88244	3.56468
2000	5	4	4.27363	3.70653
2000	5	5	2.7917	2.04949
2000	5	6	2.76184	2.13104
2000	5	7	3.18941	3.43816
2000	5	8	3.75498	4.17686
2000	5	9	3.77078	4.38754
2000	5	10	3.99864	4.37948
2000	5	11	4.30169	4.36966
2000	5	12	4.34993	4.37159
2000	5	13	3.99286	4.59678
2000	5	14	4.00914	4.41673
2000	5	15	3.80232	3.73612
2000	5	16	3.79952	3.63137
2000	5	17	3.14588	2.44684
2000	5	18	4.00559	4.39218
2000	5	19	3.62274	4.17496
2000	5	20	3.52194	3.62352
2000	5	21	3.68814	4.13689
2000	5	22	4.00422	4.41023
2000	5	23	3.61998	3.41057
2000	5	24	3.29758	3.38072
2000	5	25	3.93629	4.22418
2000	5	26	3.81945	4.11745
2000	5	27	4.27275	4.70512
2000	5	28	4.40843	4.93343
2000	5	29	4.11124	4.94506
2000	5	30	3.72029	3.86764
2000	5	31	4.3451	4.79328
2000	6	1	4.82792	5.16976
2000	6	2	4.50802	5.13763
2000	6	3	3.86097	4.75857
2000	6	4	4.25832	4.37111
2000	6	5	4.42607	4.83088
2000	6	6	4.2707	5.04519
2000	6	7	3.46122	4.11802
2000	6	8	3.90725	4.87823
2000	6	9	5.43086	5.68218
2000	6	10	5.06706	2.39974
2000	6	11	5.01716	5.38605
2000	6	12	4.87422	5.15584
2000	6	13	6.47033	6.49051
2000	6	14	7.62887	8.00331
2000	6	15	5.99232	6.46703
2000	6	16	5.02836	5.00005
2000	6	17	5.16295	4.96818
2000	6	18	4.41726	5.08707
2000	6	19	5.16523	5.7593
2000	6	20	5.35374	6.02753
2000	6	21	4.5977	4.98268
2000	6	22	5.20568	5.19022
2000	6	23	5.21487	5.23162
2000	6	24	5.00475	5.14083
2000	6	25	4.91537	5.49887
2000	6	26	4.87027	5.35083
2000	6	27	4.54461	5.19051
2000	6	28	4.4512	4.77148
2000	6	29	4.56491	5.47042
2000	6	30	4.88085	5.19975
2000	7	1	4.72325	5.21082
2000	7	2	4.9899	5.20686
2000	7	3	5.25738	5.62704
2000	7	4	5.06653	5.4032
2000	7	5	5.23409	5.42583
2000	7	6	5.17469	5.21942
2000	7	7	5.03091	5.35252
2000	7	8	5.35119	5.37314
2000	7	9	5.36716	5.44364
2000	7	10	4.40055	5.21695
2000	7	11	4.45639	5.18942
2000	7	12	5.02972	5.49089
2000	7	13	4.49227	5.49597
2000	7	14	4.10323	4.41606
2000	7	15	4.19431	4.99207
2000	7	16	3.70936	5.11253
2000	7	17	4.4404	4.56291
2000	7	18	3.85633	4.4702
2000	7	19	3.85454	4.91793
2000	7	20	4.09479	4.85706
2000	7	21	4.42199	4.99259
2000	7	22	4.58678	5.05333
2000	7	23	4.37366	4.77328
2000	7	24	4.39156	5.05377
2000	7	25	4.97084	5.14466
2000	7	26	4.8362	5.17206
2000	7	27	4.41692	5.12652
2000	7	28	4.58017	5.31539
2000	7	29	4.82976	4.73429
2000	7	30	4.72802	4.96481
2000	7	31	4.46391	5.19403
2000	8	1	4.10742	4.96485
2000	8	2	4.72171	5.40864
2000	8	3	4.68042	5.34695
2000	8	4	5.14564	5.92903
2000	8	5	4.10783	4.5018
2000	8	6	4.19949	4.6677
2000	8	7	3.86645	4.72231
2000	8	8	3.83402	4.67203
2000	8	9	3.72452	4.57779
2000	8	10	3.52241	4.06374
2000	8	11	3.54043	4.03314
2000	8	12	3.32087	3.56279
2000	8	13	3.4766	3.82692
2000	8	14	3.74915	4.4024
2000	8	15	4.83747	4.5289
2000	8	16	4.43039	4.49977
2000	8	17	4.12048	4.6453
2000	8	18	3.99324	4.51948
2000	8	19	3.87852	4.08643
2000	8	20	3.75862	4.26498
2000	8	21	4.17094	4.31716
2000	8	22	4.33935	4.238
2000	8	23	3.90126	4.15628
2000	8	24	3.52704	3.4213
2000	8	25	3.9553	4.14682
2000	8	26	3.8087	3.4461
2000	8	27	3.9463	3.53677
2000	8	28	3.91325	4.23003
2000	8	29	3.77411	4.03413
2000	8	30	3.86996	3.99477
2000	8	31	4.67087	4.42871
2000	9	1	3.4887	4.08638
2000	9	2	3.72309	4.16393
2000	9	3	3.38246	3.58876
2000	9	4	3.46851	4.02355
2000	9	5	3.45287	4.16469
2000	9	6	3.29876	3.55424
2000	9	7	3.45618	4.34013
2000	9	8	3.35033	3.89098
2000	9	9	3.59886	3.87097
2000	9	10	3.76369	4.0496
2000	9	11	3.55533	3.83821
2000	9	12	3.4824	3.99942
2000	9	13	3.13929	3.64368
2000	9	14	3.23504	3.38232
2000	9	15	3.37527	3.46296
2000	9	16	3.19917	3.42142
2000	9	17	3.10927	3.26846
2000	9	18	3.30648	3.60655
2000	9	19	3.65811	3.79975
2000	9	20	3.86621	3.8403
2000	9	21	3.78271	3.61951
2000	9	22	5.07577	5.11739
2000	9	23	3.88667	3.79524
2000	9	24	3.40168	3.50817
2000	9	25	3.18105	3.34495
2000	9	26	3.197	3.06965
2000	9	27	3.34415	3.2229
2000	9	28	2.64919	2.20895
2000	9	29	2.52755	2.03451
2000	9	30	3.06409	3.21166
2000	10	1	2.28916	2.58738
2000	10	2	2.65972	2.94186
2000	10	3	2.39665	2.55043
2000	10	4	2.98546	3.23137
2000	10	5	3.17016	3.31783
2000	10	6	2.80606	2.77961
2000	10	7	2.57129	2.79359
2000	10	8	2.26729	2.43763
2000	10	9	2.51021	2.74717
2000	10	10	1.67375	1.51194
2000	10	11	1.92794	2.44175
2000	10	12	2.02686	2.19843
2000	10	13	2.65699	2.89319
2000	10	14	3.28152	3.468
2000	10	15	3.1935	3.38268
2000	10	16	2.39762	2.60365
2000	10	17	2.38099	2.57686
2000	10	18	2.26128	2.58936
2000	10	19	2.12239	2.29272
2000	10	20	1.52942	0.930601
2000	10	21	2.08552	2.29461
2000	10	22	1.8426	1.89415
2000	10	23	1.74026	1.85284
2000	10	24	1.72366	1.30468
2000	10	25	1.81986	1.59209
2000	10	26	1.84638	1.87461
2000	10	27	1.9305	2.07709
2000	10	28	1.9466	1.95004
2000	10	29	1.37936	1.05567
2000	10	30	2.19402	2.26771
2000	10	31	2.28815	2.33413
2001	4	1	4.59781	4.46101
2001	4	2	2.26446	1.6958
2001	4	3	3.36512	3.47675
2001	4	4	3.19225	3.2574
2001	4	5	3.02676	2.95191
2001	4	6	2.88369	2.78482
2001	4	7	3.23879	2.96776
2001	4	8	3.77002	3.8918
2001	4	9	3.31295	3.31822
2001	4	10	3.16323	2.83829
2001	4	11	3.23777	3.2366
2001	4	12	3.49736	3.96323
2001	4	13	3.35438	3.36142
2001	4	14	2.89179	1.96264
2001	4	15	3.38006	3.45722
2001	4	16	2.68904	3.14691
2001	4	17	3.33758	3.50472
2001	4	18	3.8901	3.70887
2001	4	19	3.64338	3.89711
2001	4	20	3.5974	3.9823
2001	4	21	3.62069	3.36446
2001	4	22	4.38015	3.50126
2001	4	23	3.85905	4.5255
2001	4	24	3.40127	4.33928
2001	4	25	3.69742	4.33103
2001	4	26	3.40259	3.83245
2001	4	27	3.84657	4.22546
2001	4	28	4.65557	4.86903
2001	4	29	5.35002	5.56483
2001	4	30	5.62194	5.60161
2001	5	1	4.87821	4.43129
2001	5	2	5.68745	6.144
2001	5	3	3.87107	3.82617
2001	5	4	4.06984	4.49215
2001	5	5	4.26768	4.54459
2001	5	6	4.13803	3.04615
2001	5	7	3.36038	3.91936
2001	5	8	3.1565	2.24441
2001	5	9	2.81774	2.06196
2001	5	10	2.60455	2.01975
2001	5	11	2.43226	1.9682
2001	5	12	3.55218	4.03798
2001	5	13	4.62629	3.91107
2001	5	14	3.47792	4.24509
2001	5	15	2.67209	3.14528
2001	5	16	3.64573	3.73313
2001	5	17	4.27791	4.82024
2001	5	18	4.81357	5.15848
2001	5	19	4.91373	5.24794
2001	5	20	4.82783	4.73052
2001	5	21	5.02601	5.42606
2001	5	22	4.84332	5.04552
2001	5	23	5.17986	5.10573
2001	5	24	5.89723	5.99639
2001	5	25	6.28423	6.67583
2001	5	26	4.93636	4.96882
2001	5	27	5.13605	5.16007
2001	5	28	5.16948	5.07738
2001	5	29	4.86154	5.66953
2001	5	30	4.44954	5.25863
2001	5	31	4.56193	5.30772
2001	6	1	5.47803	5.59181
2001	6	2	5.78873	5.64575
2001	6	3	5.43744	5.76467
2001	6	4	4.49354	5.26427
2001	6	5	4.18306	4.8275
2001	6	6	4.24473	5.22663
2001	6	7	4.92961	5.49244
2001	6	8	4.37564	5.18366
2001	6	9	4.9888	5.50466
2001	6	10	5.69447	6.02251
2001	6	11	6.1446	6.06561
2001	6	12	6.06857	5.95407
2001	6	13	5.91483	5.84806
2001	6	14	5.9534	5.89648
2001	6	15	5.029	5.83636
2001	6	16	3.97794	4.31944
2001	6	17	5.96242	6.91959
2001	6	18	4.87925	5.81187
2001	6	19	4.69024	5.75463
2001	6	20	4.67234	5.65404
2001	6	21	4.89808	5.73459
2001	6	22	4.746	6.10709
2001	6	23	4.62064	5.30728
2001	6	24	4.46694	5.63866
2001	6	25	4.58473	5.54935
2001	6	26	4.19718	5.49453
2001	6	27	4.44034	4.78015
2001	6	28	4.51207	5.43555
2001	6	29	5.4717	6.05242
2001	6	30	5.67545	6.22867
2001	7	1	4.64083	5.38833
2001	7	2	4.06714	5.42159
2001	7	3	4.2175	5.11683
2001	7	4	4.31965	5.0974
2001	7	5	4.40342	5.05726
2001	7	6	4.44686	5.72079
2001	7	7	4.38187	5.30945
2001	7	8	4.83235	5.89591
2001	7	9	5.57342	6.36804
2001	7	10	5.01729	5.88971
2001	7	11	4.90929	5.73157
2001	7	12	4.6801	5.65372
2001	7	13	4.48112	4.95756
2001	7	14	4.19869	5.02329
2001	7	15	4.05131	4.55002
2001	7	16	4.26157	4.48206
2001	7	17	4.27186	5.25309
2001	7	18	4.2799	5.3914
2001	7	19	4.36249	5.07135
2001	7	20	4.64192	5.65297
2001	7	21	4.65027	5.81372
2001	7	22	4.32689	5.38762
2001	7	23	5.07872	5.64344
2001	7	24	4.55219	5.39834
2001	7	25	4.26066	5.21436
2001	7	26	4.38008	5.02422
2001	7	27	4.40363	5.0006
2001	7	28	3.96074	3.94294
2001	7	29	4.49108	4.24374
2001	7	30	3.92547	4.3377
2001	7	31	4.33526	4.11314
2001	8	1	4.03535	5.20024
2001	8	2	4.11993	4.91945
2001	8	3	4.27087	5.12823
2001	8	4	4.04116	4.43011
2001	8	5	4.1538	5.07979
2001	8	6	4.19694	4.70145
2001	8	7	4.21729	5.12883
2001	8	8	4.27659	4.80051
2001	8	9	4.13361	4.89024
2001	8	10	4.8225	5.32482
2001	8	11	4.37924	5.19406
2001	8	12	4.10665	4.55816
2001	8	13	4.10278	4.56617
2001	8	14	4.32059	5.03396
2001	8	15	4.31785	5.12698
2001	8	16	4.27215	4.83303
2001	8	17	4.19476	5.05542
2001	8	18	5.05803	4.36459
2001	8	19	4.38765	4.06163
2001	8	20	4.51775	4.8656
2001	8	21	4.20634	4.94314
2001	8	22	4.61591	5.12019
2001	8	23	4.3167	5.03992
2001	8	24	4.28095	5.15174
2001	8	25	4.4487	5.06307
2001	8	26	4.17153	4.81599
2001	8	27	4.63895	5.115
2001	8	28	4.3296	4.8241
2001	8	29	4.37329	4.80778
2001	8	30	4.20508	4.6959
2001	8	31	4.33548	4.75357
2001	9	1	3.64431	4.47903
2001	9	2	3.75893	4.42924
2001	9	3	3.59812	4.38848
2001	9	4	3.38738	4.10853
2001	9	5	3.72302	4.40874
2001	9	6	3.50486	4.19897
2001	9	7	3.30217	3.22627
2001	9	8	3.43281	4.22871
2001	9	9	3.31118	3.81327
2001	9	10	3.41711	4.24178
2001	9	11	3.32911	3.70131
2001	9	12	3.36063	3.87476
2001	9	13	3.32481	4.01048
2001	9	14	3.25586	3.76844
2001	9	15	3.21411	4.00941
2001	9	16	3.41737	3.88635
2001	9	17	3.4237	3.97942
2001	9	18	3.62352	3.97065
2001	9	19	3.62579	3.93323
2001	9	20	3.64305	4.00407
2001	9	21	3.72414	3.85015
2001	9	22	3.70614	3.71384
2001	9	23	3.69722	3.72106
2001	9	24	3.73225	3.84246
2001	9	25	3.55773	3.74329
2001	9	26	3.37544	3.45832
2001	9	27	3.3243	3.64527
2001	9	28	3.17063	3.8273
2001	9	29	3.6779	3.90785
2001	9	30	3.5179	3.71615
2001	10	1	2.75619	2.99028
2001	10	2	2.63497	2.92933
2001	10	3	2.65367	2.81854
2001	10	4	2.87711	3.08717
2001	10	5	2.56472	2.75694
2001	10	6	2.88143	3.22805
2001	10	7	2.52792	2.99889
2001	10	8	2.75837	2.93042
2001	10	9	4.25491	4.35388
2001	10	10	2.52886	2.87194
2001	10	11	2.50636	2.7577
2001	10	12	2.54456	2.70728
2001	10	13	2.38193	2.36746
2001	10	14	2.41156	2.46397
2001	10	15	2.22784	2.62431
2001	10	16	2.48089	2.76616
2001	10	17	2.42053	2.54656
2001	10	18	2.46997	2.57795
2001	10	19	2.83969	2.95936
2001	10	20	2.3155	2.39935
2001	10	21	2.64748	2.59149
2001	10	22	2.40603	2.46627
2001	10	23	2.56172	2.67812
2001	10	24	2.49731	2.64184
2001	10	25	3.12493	3.03664
2001	10	26	3.57176	3.63422
2001	10	27	2.85729	2.85303
2001	10	28	1.76824	1.53496
2001	10	29	1.93788	1.81676
2001	10	30	1.93542	1.99102
2001	10	31	1.93845	1.96357
2002	4	1	2.0437	1.53546
2002	4	2	2.19238	1.98592
2002	4	3	3.23815	3.288
2002	4	4	2.18396	1.67658
2002	4	5	3.0321	3.33261
2002	4	6	2.52113	1.92789
2002	4	7	3.32423	3.30571
2002	4	8	3.09408	2.93949
2002	4	9	3.08308	3.31957
2002	4	10	3.63582	3.69638
2002	4	11	3.94509	3.96889
2002	4	12	3.52858	3.63671
2002	4	13	2.67339	1.81506
2002	4	14	3.22892	3.4274
2002	4	15	3.31391	2.47895
2002	4	16	2.72993	1.95728
2002	4	17	3.16314	3.62063
2002	4	18	2.71305	2.94741
2002	4	19	2.25089	1.79813
2002	4	20	2.65118	2.76972
2002	4	21	3.08145	3.18008
2002	4	22	2.62882	2.13044
2002	4	23	2.63226	2.70571
2002	4	24	2.3831	2.17836
2002	4	25	3.05836	3.3889
2002	4	26	3.05006	3.34027
2002	4	27	3.34387	3.44821
2002	4	28	3.41943	3.954
2002	4	29	3.22612	3.4884
2002	4	30	3.44777	3.95451
2002	5	1	4.16954	4.23509
2002	5	2	3.33597	2.3895
2002	5	3	3.79904	3.69969
2002	5	4	3.87309	3.88989
2002	5	5	3.84575	3.72093
2002	5	6	4.39125	4.81647
2002	5	7	4.63355	4.26487
2002	5	8	4.4589	4.14161
2002	5	9	4.80978	4.8285
2002	5	10	4.51906	4.58899
2002	5	11	4.89871	4.49398
2002	5	12	4.07074	3.81513
2002	5	13	4.01908	3.89265
2002	5	14	3.10305	2.45442
2002	5	15	3.67078	2.87881
2002	5	16	4.55918	4.40795
2002	5	17	4.48448	4.31658
2002	5	18	3.21783	2.4038
2002	5	19	4.12002	4.00557
2002	5	20	3.99438	4.48821
2002	5	21	4.15287	4.22899
2002	5	22	3.91022	4.51183
2002	5	23	3.74332	3.27202
2002	5	24	4.13813	4.61788
2002	5	25	4.33399	4.85464
2002	5	26	5.43056	5.32793
2002	5	27	4.39425	4.49287
2002	5	28	3.87863	4.39414
2002	5	29	4.06451	4.02274
2002	5	30	4.32501	4.58925
2002	5	31	4.14702	4.53689
2002	6	1	3.98315	3.18313
2002	6	2	4.58685	4.6623
2002	6	3	5.05132	5.20299
2002	6	4	5.01205	4.55623
2002	6	5	4.43926	3.67692
2002	6	6	4.68667	4.93375
2002	6	7	5.37348	5.37389
2002	6	8	5.7558	4.9303
2002	6	9	6.27654	5.49133
2002	6	10	6.0622	5.52072
2002	6	11	4.51579	5.47261
2002	6	12	4.37921	4.74747
2002	6	13	4.78738	5.02829
2002	6	14	5.19873	5.44521
2002	6	15	4.90412	5.3582
2002	6	16	4.50502	4.74165
2002	6	17	4.02078	4.54077
2002	6	18	4.41419	5.13659
2002	6	19	6.24383	6.75725
2002	6	20	5.79084	6.19138
2002	6	21	6.9581	7.51953
2002	6	22	5.16398	5.38212
2002	6	23	4.78528	5.39072
2002	6	24	4.64798	5.22538
2002	6	25	4.26041	5.10903
2002	6	26	4.1255	3.8961
2002	6	27	4.59266	5.03295
2002	6	28	4.25729	4.65925
2002	6	29	4.50354	5.35527
2002	6	30	4.85447	5.68488
2002	7	1	4.65982	5.04168
2002	7	2	4.78572	4.6613
2002	7	3	4.53421	4.84904
2002	7	4	4.80098	5.55604
2002	7	5	4.68574	5.72507
2002	7	6	4.95676	5.62484
2002	7	7	4.73365	5.6402
2002	7	8	4.52684	4.99157
2002	7	9	4.12746	4.70982
2002	7	10	4.55992	5.1667
2002	7	11	4.27947	4.52065
2002	7	12	4.1047	4.58957
2002	7	13	4.11916	4.25163
2002	7	14	4.38627	4.31455
2002	7	15	4.83416	5.35668
2002	7	16	5.0636	5.61327
2002	7	17	5.09232	5.8019
2002	7	18	4.85528	5.72462
2002	7	19	4.77233	5.43484
2002	7	20	4.92165	5.55924
2002	7	21	4.68183	5.23125
2002	7	22	4.43716	4.95703
2002	7	23	4.31764	5.03883
2002	7	24	6.20349	6.65979
2002	7	25	5.31401	5.95942
2002	7	26	4.79411	5.329
2002	7	27	4.79503	5.09231
2002	7	28	4.66609	5.45092
2002	7	29	5.36743	5.57728
2002	7	30	5.81383	5.59705
2002	7	31	5.62875	5.59529
2002	8	1	4.79046	5.33185
2002	8	2	4.71576	5.60477
2002	8	3	4.20462	4.50297
2002	8	4	4.30011	4.54122
2002	8	5	4.30483	4.76047
2002	8	6	4.51262	4.9582
2002	8	7	4.51916	5.18527
2002	8	8	4.03011	4.81974
2002	8	9	4.21683	4.60315
2002	8	10	4.55896	4.96406
2002	8	11	4.43843	5.34546
2002	8	12	5.3096	5.66269
2002	8	13	4.79606	5.40699
2002	8	14	4.26372	4.928
2002	8	15	4.093	4.67316
2002	8	16	4.42681	4.17677
2002	8	17	4.35282	4.17924
2002	8	18	4.07776	3.31666
2002	8	19	3.81988	4.37036
2002	8	20	4.0614	4.5184
2002	8	21	4.06336	4.25968
2002	8	22	4.11292	4.55493
2002	8	23	4.32235	4.91813
2002	8	24	4.51001	4.97452
2002	8	25	4.43667	4.92916
2002	8	26	4.5478	5.00399
2002	8	27	4.7151	4.93154
2002	8	28	4.71378	4.71022
2002	8	29	4.61584	4.86456
2002	8	30	4.38035	4.56524
2002	8	31	4.19133	4.14941
2002	9	1	3.46903	3.97581
2002	9	2	3.47861	4.18005
2002	9	3	3.48993	4.14112
2002	9	4	3.39936	4.04602
2002	9	5	3.23595	3.54231
2002	9	6	3.23624	3.8464
2002	9	7	3.32477	3.40561
2002	9	8	3.64887	3.67758
2002	9	9	3.75428	4.03185
2002	9	10	3.2409	3.31849
2002	9	11	3.78003	3.59597
2002	9	12	3.56284	3.23729
2002	9	13	3.54929	3.75802
2002	9	14	3.35295	3.62782
2002	9	15	3.56642	3.68398
2002	9	16	3.47254	3.67305
2002	9	17	3.62316	3.78813
2002	9	18	3.35434	3.87318
2002	9	19	3.93156	4.32194
2002	9	20	3.54848	3.62614
2002	9	21	4.18568	3.9602
2002	9	22	4.44895	4.15627
2002	9	23	3.41045	3.49633
2002	9	24	3.18697	3.15119
2002	9	25	3.44938	3.41097
2002	9	26	3.31131	3.28084
2002	9	27	3.17401	3.14065
2002	9	28	3.37929	3.43173
2002	9	29	3.63621	3.39985
2002	9	30	3.71601	3.31849
2002	10	1	3.05914	2.78046
2002	10	2	2.10463	1.98066
2002	10	3	2.88646	3.08205
2002	10	4	2.45973	2.66046
2002	10	5	2.44716	2.65277
2002	10	6	2.70472	2.7363
2002	10	7	2.12244	1.96004
2002	10	8	2.56186	2.55881
2002	10	9	2.34234	2.55378
2002	10	10	2.51662	2.65602
2002	10	11	2.70283	2.66633
2002	10	12	2.66	2.65359
2002	10	13	2.83205	2.7336
2002	10	14	2.53235	1.8316
2002	10	15	2.48852	2.66097
2002	10	16	2.0105	1.96396
2002	10	17	2.27223	2.13427
2002	10	18	2.68092	2.52691
2002	10	19	2.55057	2.46584
2002	10	20	2.2999	2.25592
2002	10	21	3.61995	3.81198
2002	10	22	2.59897	2.62094
2002	10	23	2.29474	2.24123
2002	10	24	2.33681	2.21084
2002	10	25	2.31149	2.08859
2002	10	26	2.29111	2.1744
2002	10	27	2.27671	2.27737
2002	10	28	2.2083	2.1909
2002	10	29	2.35174	2.22505
2002	10	30	3.64498	3.73411
2002	10	31	2.36857	2.22904
2003	4	1	3.27186	2.99259
2003	4	2	2.81394	2.35287
2003	4	3	3.48744	3.16313
2003	4	4	4.37659	3.73815
2003	4	5	4.67964	3.78239
2003	4	6	3.26313	3.84597
2003	4	7	2.96077	3.00331
2003	4	8	3.83806	3.72032
2003	4	9	3.349	3.42812
2003	4	10	3.32788	3.31858
2003	4	11	3.91927	3.83932
2003	4	12	4.00235	3.83067
2003	4	13	3.56506	3.68871
2003	4	14	2.66655	2.08426
2003	4	15	1.94728	1.44931
2003	4	16	2.87252	3.32203
2003	4	17	2.53399	2.0137
2003	4	18	2.33992	1.63594
2003	4	19	3.22832	3.42779
2003	4	20	2.59237	2.31818
2003	4	21	2.63761	2.62057
2003	4	22	3.06479	3.13678
2003	4	23	2.77694	2.01448
2003	4	24	3.94286	3.51757
2003	4	25	2.30924	1.01636
2003	4	26	2.60105	2.18971
2003	4	27	4.0016	4.19685
2003	4	28	3.4636	3.8482
2003	4	29	3.09973	2.90478
2003	4	30	3.74457	3.78062
2003	5	1	5.00265	4.68524
2003	5	2	5.69358	5.67676
2003	5	3	5.20191	5.16127
2003	5	4	5.34856	5.39597
2003	5	5	5.40907	5.30736
2003	5	6	5.37404	5.34394
2003	5	7	6.47238	6.93122
2003	5	8	6.10761	6.50763
2003	5	9	5.94145	6.17696
2003	5	10	5.93522	5.87816
2003	5	11	5.96041	5.77667
2003	5	12	5.51344	5.30852
2003	5	13	5.5044	5.21726
2003	5	14	5.52807	5.46076
2003	5	15	4.38652	4.21416
2003	5	16	4.53399	4.72843
2003	5	17	5.07364	4.55348
2003	5	18	5.13816	5.21905
2003	5	19	4.94742	5.28778
2003	5	20	4.83148	5.15958
2003	5	21	4.4465	4.67023
2003	5	22	3.98176	4.72355
2003	5	23	3.96727	5.03451
2003	5	24	4.79615	4.94353
2003	5	25	4.13718	5.46132
2003	5	26	4.21356	4.86623
2003	5	27	4.29213	4.89367
2003	5	28	4.10705	3.98446
2003	5	29	3.61025	3.18624
2003	5	30	3.50357	2.95091
2003	5	31	3.08391	2.36862
2003	6	1	4.29575	4.49216
2003	6	2	3.79839	3.88288
2003	6	3	4.34955	4.43513
2003	6	4	4.7018	4.87725
2003	6	5	5.90183	6.17669
2003	6	6	5.67963	6.02311
2003	6	7	5.73403	5.67673
2003	6	8	4.18298	3.16381
2003	6	9	4.05772	4.3511
2003	6	10	4.30847	4.06771
2003	6	11	3.9461	4.54371
2003	6	12	4.49944	4.1812
2003	6	13	5.1223	5.24422
2003	6	14	5.01511	5.59882
2003	6	15	4.77668	5.63862
2003	6	16	4.77626	5.47385
2003	6	17	4.41294	4.68541
2003	6	18	5.04618	5.54025
2003	6	19	4.60999	5.59297
2003	6	20	4.18746	5.18259
2003	6	21	3.94685	4.5104
2003	6	22	3.98884	4.45969
2003	6	23	4.91637	5.42122
2003	6	24	5.22401	5.76902
2003	6	25	5.70868	6.11068
2003	6	26	5.47331	5.6294
2003	6	27	4.85795	5.07363
2003	6	28	4.64408	4.68692
2003	6	29	4.64793	5.29741
2003	6	30	4.70965	5.70774
2003	7	1	4.77935	5.91088
2003	7	2	4.86005	5.55066
2003	7	3	5.16965	5.72415
2003	7	4	4.79437	5.76501
2003	7	5	5.82413	5.92507
2003	7	6	4.00415	4.01945
2003	7	7	4.49716	4.77281
2003	7	8	4.56963	5.34512
2003	7	9	4.30422	4.69514
2003	7	10	4.55736	5.20797
2003	7	11	4.72687	5.51269
2003	7	12	4.37455	5.56036
2003	7	13	4.41375	5.25678
2003	7	14	4.0705	4.88398
2003	7	15	4.31441	4.94282
2003	7	16	4.29162	5.31529
2003	7	17	4.33214	5.25279
2003	7	18	4.70378	5.44032
2003	7	19	4.99421	5.80401
2003	7	20	5.04314	5.57669
2003	7	21	4.52492	5.27952
2003	7	22	4.59827	5.34253
2003	7	23	4.50897	5.48498
2003	7	24	4.65793	5.1952
2003	7	25	4.34123	5.05565
2003	7	26	4.37701	5.22715
2003	7	27	4.19155	5.00425
2003	7	28	4.20571	5.05534
2003	7	29	4.36023	4.92682
2003	7	30	4.19185	5.08994
2003	7	31	4.09751	4.83894
2003	8	1	3.89978	4.98453
2003	8	2	4.10427	4.93868
2003	8	3	3.96362	4.88334
2003	8	4	3.72832	4.57773
2003	8	5	3.86553	4.03817
2003	8	6	3.91774	4.49031
2003	8	7	4.14384	4.77938
2003	8	8	3.65935	3.82767
2003	8	9	3.83468	4.48239
2003	8	10	3.96076	4.60971
2003	8	11	3.34503	4.88063
2003	8	12	4.03372	4.38064
2003	8	13	4.20339	4.68503
2003	8	14	3.9387	4.66228
2003	8	15	4.22776	4.31138
2003	8	16	4.31164	4.29912
2003	8	17	4.20196	4.81289
2003	8	18	4.16622	4.66528
2003	8	19	4.48461	4.30523
2003	8	20	4.22622	4.74232
2003	8	21	3.8857	4.34389
2003	8	22	4.22076	4.53466
2003	8	23	3.97749	4.62343
2003	8	24	4.12148	4.53009
2003	8	25	3.86461	4.05276
2003	8	26	4.07105	4.29932
2003	8	27	3.83575	3.79939
2003	8	28	4.02462	3.96663
2003	8	29	3.95569	4.16643
2003	8	30	4.05817	4.4036
2003	8	31	4.10522	4.53355
2003	9	1	3.29246	4.19789
2003	9	2	3.38555	3.78758
2003	9	3	3.33368	3.76332
2003	9	4	3.1459	3.41733
2003	9	5	3.07355	3.21656
2003	9	6	3.62157	4.15795
2003	9	7	3.93091	4.40854
2003	9	8	3.36894	3.71475
2003	9	9	3.31434	3.57583
2003	9	10	3.09935	3.33092
2003	9	11	2.84993	2.92158
2003	9	12	3.04743	3.48673
2003	9	13	3.09474	3.37991
2003	9	14	3.10125	3.3308
2003	9	15	2.93211	3.01699
2003	9	16	3.11926	3.12525
2003	9	17	2.94107	2.81931
2003	9	18	4.03405	4.25021
2003	9	19	3.45013	3.6508
2003	9	20	3.60063	3.94027
2003	9	21	5.011	5.25383
2003	9	22	4.45682	4.60163
2003	9	23	4.49635	4.43024
2003	9	24	3.43964	3.34673
2003	9	25	3.13665	3.02496
2003	9	26	3.2935	3.22851
2003	9	27	3.19889	3.10891
2003	9	28	2.97727	2.81473
2003	9	29	3.14615	3.10143
2003	9	30	3.82172	3.22169
2003	10	1	2.25161	2.09192
2003	10	2	2.15724	2.34338
2003	10	3	2.29141	2.50199
2003	10	4	2.442	2.72887
2003	10	5	2.36747	2.67452
2003	10	6	2.41279	2.56747
2003	10	7	2.54257	2.636
2003	10	8	2.28939	2.35601
2003	10	9	2.08811	2.14622
2003	10	10	2.28367	2.44195
2003	10	11	2.29179	2.66544
2003	10	12	2.23056	2.32684
2003	10	13	2.11249	2.20156
2003	10	14	2.17479	2.17391
2003	10	15	2.54441	2.51234
2003	10	16	2.37506	2.47779
2003	10	17	2.12351	2.25216
2003	10	18	2.1256	2.12833
2003	10	19	2.14126	2.16608
2003	10	20	2.0117	1.81148
2003	10	21	2.14373	2.07486
2003	10	22	2.15135	2.14656
2003	10	23	2.33954	2.21895
2003	10	24	1.84337	1.39588
2003	10	25	2.23329	2.11295
2003	10	26	2.17566	1.98092
2003	10	27	2.7937	2.83799
2003	10	28	2.12606	2.05671
2003	10	29	2.7184	2.87199
2003	10	30	1.93928	1.9119
2003	10	31	1.2433	0.901856
2004	4	1	3.08973	2.9297
2004	4	2	3.74719	3.37115
2004	4	3	3.96417	4.43566
2004	4	4	4.35771	4.83576
2004	4	5	3.49142	3.60639
2004	4	6	2.81156	2.5232
2004	4	7	3.17129	3.19949
2004	4	8	3.14529	3.03281
2004	4	9	3.19741	3.00628
2004	4	10	4.27323	3.90843
2004	4	11	4.3728	3.96105
2004	4	12	4.17659	3.94319
2004	4	13	4.08774	3.58973
2004	4	14	3.61266	3.15324
2004	4	15	3.63036	3.65896
2004	4	16	3.71102	4.16895
2004	4	17	3.77495	3.51024
2004	4	18	2.47368	1.62017
2004	4	19	3.62123	3.67218
2004	4	20	3.15192	2.99138
2004	4	21	2.19835	1.3051
2004	4	22	2.93316	3.19388
2004	4	23	2.67404	2.56773
2004	4	24	2.93861	3.03731
2004	4	25	2.98273	3.24242
2004	4	26	4.05058	4.21538
2004	4	27	5.1412	5.29978
2004	4	28	3.7255	3.95551
2004	4	29	4.10976	4.41352
2004	4	30	3.13904	2.73672
2004	5	1	4.3274	3.7965
2004	5	2	4.48672	3.56917
2004	5	3	3.5463	2.84516
2004	5	4	3.4358	3.36377
2004	5	5	3.66578	3.64407
2004	5	6	4.10171	3.78425
2004	5	7	4.10806	4.60659
2004	5	8	3.31484	3.11332
2004	5	9	3.58172	3.59026
2004	5	10	6.2629	5.95142
2004	5	11	2.98858	3.025
2004	5	12	3.77602	3.88778
2004	5	13	3.83996	4.22465
2004	5	14	3.85797	3.97434
2004	5	15	3.68751	3.17949
2004	5	16	3.97472	3.98997
2004	5	17	3.59815	2.68841
2004	5	18	4.17587	4.22434
2004	5	19	3.67972	3.6808
2004	5	20	4.44398	4.7613
2004	5	21	4.77374	4.68892
2004	5	22	4.32967	4.37355
2004	5	23	4.08238	4.337
2004	5	24	4.37287	4.44895
2004	5	25	4.4892	4.4818
2004	5	26	4.47976	4.51651
2004	5	27	4.21588	4.40731
2004	5	28	4.25988	4.576
2004	5	29	3.87324	4.25154
2004	5	30	4.12868	4.56051
2004	5	31	3.48487	3.61743
2004	6	1	4.25733	4.17014
2004	6	2	3.87764	3.94516
2004	6	3	3.7814	4.34686
2004	6	4	4.43334	4.60341
2004	6	5	5.02191	4.78592
2004	6	6	5.23473	4.89911
2004	6	7	4.87563	5.0586
2004	6	8	4.26982	4.3531
2004	6	9	4.85914	4.8826
2004	6	10	5.04086	5.19806
2004	6	11	4.89692	5.26073
2004	6	12	4.94479	5.1128
2004	6	13	5.03369	5.13054
2004	6	14	4.87674	5.06913
2004	6	15	4.88807	5.24307
2004	6	16	4.2316	4.85636
2004	6	17	4.2416	4.90701
2004	6	18	4.67234	4.92615
2004	6	19	4.4971	4.30464
2004	6	20	4.30841	5.12719
2004	6	21	4.16696	4.56553
2004	6	22	4.04135	4.31993
2004	6	23	3.92707	4.17248
2004	6	24	4.29327	4.64124
2004	6	25	4.18651	4.54733
2004	6	26	4.23107	4.95063
2004	6	27	4.46847	5.32793
2004	6	28	4.43587	5.23187
2004	6	29	5.71831	6.00069
2004	6	30	5.46279	5.38292
2004	7	1	5.12374	5.20188
2004	7	2	5.14185	5.57544
2004	7	3	4.70975	5.33506
2004	7	4	4.77162	5.26054
2004	7	5	4.96801	5.5344
2004	7	6	5.89229	5.75361
2004	7	7	5.72075	5.57937
2004	7	8	4.69345	5.21603
2004	7	9	4.11039	4.36678
2004	7	10	5.07997	5.6467
2004	7	11	4.88484	5.67838
2004	7	12	4.54113	5.1478
2004	7	13	4.62519	5.24597
2004	7	14	4.48377	4.61886
2004	7	15	4.71123	5.69289
2004	7	16	4.29075	4.85597
2004	7	17	4.94994	5.46293
2004	7	18	5.02265	5.34573
2004	7	19	5.1585	5.57853
2004	7	20	4.96343	5.36121
2004	7	21	4.67484	5.04865
2004	7	22	5.00764	5.28247
2004	7	23	4.86278	5.34559
2004	7	24	4.48558	4.98856
2004	7	25	4.2634	4.85871
2004	7	26	4.30765	4.37658
2004	7	27	3.89997	4.17411
2004	7	28	4.30263	4.09475
2004	7	29	4.70888	4.76613
2004	7	30	4.80568	4.88448
2004	7	31	4.41895	4.67656
2004	8	1	3.5789	4.19839
2004	8	2	4.00476	4.6071
2004	8	3	3.72498	4.2743
2004	8	4	3.80561	4.48312
2004	8	5	3.84882	4.26912
2004	8	6	4.14247	4.34
2004	8	7	3.97421	4.11036
2004	8	8	3.60902	3.97043
2004	8	9	3.92081	4.33918
2004	8	10	3.78004	3.83328
2004	8	11	3.49192	3.86332
2004	8	12	4.68231	4.99379
2004	8	13	4.51429	4.99371
2004	8	14	4.31981	4.98959
2004	8	15	4.23479	4.52236
2004	8	16	3.97504	4.37666
2004	8	17	4.01503	4.34923
2004	8	18	4.095	4.54891
2004	8	19	4.07767	4.44587
2004	8	20	4.13335	4.60074
2004	8	21	4.19173	4.47626
2004	8	22	4.29014	4.61037
2004	8	23	4.04781	4.27766
2004	8	24	4.47448	4.56685
2004	8	25	4.73814	4.77129
2004	8	26	4.64336	4.8437
2004	8	27	4.4885	4.74284
2004	8	28	4.28108	4.37813
2004	8	29	4.1148	4.22415
2004	8	30	3.92759	4.21399
2004	8	31	4.13145	4.01077
2004	9	1	3.48759	3.80732
2004	9	2	3.37554	3.7648
2004	9	3	3.6925	4.1268
2004	9	4	3.63839	4.00992
2004	9	5	3.62163	4.03029
2004	9	6	4.29947	4.55292
2004	9	7	3.99577	4.08527
2004	9	8	3.75363	3.82541
2004	9	9	3.70557	4.05972
2004	9	10	3.58896	3.69105
2004	9	11	4.32512	4.49116
2004	9	12	5.7449	5.99708
2004	9	13	3.65342	3.71055
2004	9	14	3.73056	3.80109
2004	9	15	3.73292	3.7376
2004	9	16	3.75116	3.80884
2004	9	17	3.40498	3.6277
2004	9	18	3.77567	3.79081
2004	9	19	3.85695	3.54032
2004	9	20	3.92722	3.63537
2004	9	21	3.92221	3.62957
2004	9	22	3.3545	3.39737
2004	9	23	3.51624	3.22833
2004	9	24	3.50674	3.40301
2004	9	25	3.41147	3.38769
2004	9	26	3.47308	3.28832
2004	9	27	3.57779	3.26196
2004	9	28	3.6565	3.34264
2004	9	29	3.79252	3.38194
2004	9	30	3.57543	3.25503
2004	10	1	2.60734	2.85413
2004	10	2	2.72629	3.28062
2004	10	3	2.47462	2.49704
2004	10	4	2.42614	2.58601
2004	10	5	3.44132	3.55262
2004	10	6	2.57447	2.45916
2004	10	7	2.17937	2.11594
2004	10	8	2.56121	2.71597
2004	10	9	2.2504	2.50405
2004	10	10	2.45431	2.66027
2004	10	11	2.6248	2.66019
2004	10	12	3.0771	3.03876
2004	10	13	2.67926	2.57017
2004	10	14	2.58139	2.58091
2004	10	15	2.59209	2.55292
2004	10	16	2.46189	2.2935
2004	10	17	2.55483	2.49451
2004	10	18	2.75044	2.63693
2004	10	19	2.76641	2.59633
2004	10	20	2.54929	2.42976
2004	10	21	2.72768	2.76972
2004	10	22	2.34904	2.29695
2004	10	23	2.45999	2.41178
2004	10	24	2.95023	2.85332
2004	10	25	3.31642	3.22765
2004	10	26	3.50899	3.31578
2004	10	27	3.67044	3.49123
2004	10	28	3.25542	2.94075
2004	10	29	2.98136	2.73991
2004	10	30	2.2475	2.03899
2004	10	31	2.67035	2.49222
2005	4	1	3.43316	3.53152
2005	4	2	2.26784	2.18641
2005	4	3	2.29374	1.7393
2005	4	4	2.69548	2.60093
2005	4	5	3.18069	3.48102
2005	4	6	3.73312	3.74359
2005	4	7	3.74551	3.64914
2005	4	8	5.01944	4.78107
2005	4	9	4.56331	4.38098
2005	4	10	4.05579	3.8563
2005	4	11	4.66847	4.40107
2005	4	12	4.52439	4.10114
2005	4	13	5.54729	5.21614
2005	4	14	3.25171	3.97971
2005	4	15	3.12219	3.38203
2005	4	16	2.94113	2.7218
2005	4	17	3.09198	2.98636
2005	4	18	2.86361	1.74854
2005	4	19	3.4516	3.28977
2005	4	20	3.28977	3.35396
2005	4	21	3.88397	3.63706
2005	4	22	2.62087	1.57898
2005	4	23	3.62914	3.30563
2005	4	24	3.69014	4.17024
2005	4	25	3.63051	3.85272
2005	4	26	3.44327	3.83784
2005	4	27	3.10526	3.42226
2005	4	28	3.37943	3.69732
2005	4	29	3.60136	3.53528
2005	4	30	2.79244	2.55861
2005	5	1	3.15189	2.8128
2005	5	2	4.06824	3.73506
2005	5	3	4.16419	4.1671
2005	5	4	4.22314	4.14827
2005	5	5	4.35533	4.29405
2005	5	6	2.91449	2.09436
2005	5	7	4.38193	3.83754
2005	5	8	4.14502	3.45264
2005	5	9	3.84109	3.68054
2005	5	10	4.26173	4.39703
2005	5	11	5.25079	4.77312
2005	5	12	5.20821	4.68206
2005	5	13	3.96131	3.39873
2005	5	14	4.65145	4.77669
2005	5	15	4.58313	4.72993
2005	5	16	4.14129	3.56301
2005	5	17	4.78054	4.65547
2005	5	18	5.4467	5.10538
2005	5	19	5.35801	5.08936
2005	5	20	5.3282	4.88349
2005	5	21	5.26531	4.26696
2005	5	22	4.4499	4.8262
2005	5	23	4.24602	4.28684
2005	5	24	4.06137	4.17917
2005	5	25	3.72848	3.90351
2005	5	26	3.81625	4.17682
2005	5	27	5.51814	5.07035
2005	5	28	3.86182	4.04735
2005	5	29	3.816	3.10672
2005	5	30	3.48391	2.76038
2005	5	31	2.96992	2.67948
2005	6	1	3.45036	2.36364
2005	6	2	4.11963	3.93141
2005	6	3	4.40701	4.27551
2005	6	4	4.50016	4.30083
2005	6	5	4.70323	4.86901
2005	6	6	4.63719	4.76881
2005	6	7	5.32315	5.08581
2005	6	8	4.87976	5.17476
2005	6	9	4.4734	4.77693
2005	6	10	3.59181	2.97982
2005	6	11	4.10033	4.05965
2005	6	12	4.22458	4.28914
2005	6	13	4.21372	4.54264
2005	6	14	5.10577	5.12276
2005	6	15	4.18019	4.24302
2005	6	16	4.96735	5.02778
2005	6	17	5.85554	5.41218
2005	6	18	4.78922	5.10717
2005	6	19	4.32158	4.6277
2005	6	20	4.27558	4.65255
2005	6	21	4.30956	3.95462
2005	6	22	4.78958	5.16341
2005	6	23	5.66351	5.87348
2005	6	24	5.46793	5.37508
2005	6	25	4.72945	5.20871
2005	6	26	4.908	5.39897
2005	6	27	5.34849	5.59125
2005	6	28	4.7455	5.36748
2005	6	29	4.55058	4.93239
2005	6	30	4.30632	4.49837
2005	7	1	4.09657	5.02707
2005	7	2	4.2319	4.44972
2005	7	3	4.21566	4.37349
2005	7	4	4.13149	4.90506
2005	7	5	4.23942	4.31745
2005	7	6	4.55499	4.79511
2005	7	7	4.07987	4.74117
2005	7	8	4.233	4.90545
2005	7	9	4.46977	5.11431
2005	7	10	4.34054	4.99024
2005	7	11	4.5158	5.1262
2005	7	12	4.48231	5.22272
2005	7	13	4.30934	4.94527
2005	7	14	3.61793	4.19603
2005	7	15	3.90562	4.70121
2005	7	16	4.48948	4.76058
2005	7	17	4.98626	5.30206
2005	7	18	4.70053	5.28395
2005	7	19	4.88623	5.43091
2005	7	20	5.17677	5.4627
2005	7	21	5.00144	5.37314
2005	7	22	4.60608	4.92728
2005	7	23	4.29749	4.6205
2005	7	24	4.07962	4.56665
2005	7	25	3.85394	4.43228
2005	7	26	4.20761	4.62655
2005	7	27	4.33593	5.10427
2005	7	28	4.65847	4.85798
2005	7	29	4.61215	4.75519
2005	7	30	3.79093	3.99932
2005	7	31	3.87692	3.67164
2005	8	1	3.498	4.24391
2005	8	2	4.78573	3.76002
2005	8	3	4.5642	4.92082
2005	8	4	4.43979	5.04883
2005	8	5	4.08082	4.52673
2005	8	6	4.00541	4.85738
2005	8	7	3.60075	5.03531
2005	8	8	4.74096	4.72425
2005	8	9	4.24011	4.77167
2005	8	10	3.96169	4.42151
2005	8	11	4.08971	4.65816
2005	8	12	4.57023	4.88635
2005	8	13	4.46767	4.94557
2005	8	14	4.73396	5.08021
2005	8	15	4.49977	4.88985
2005	8	16	4.24258	4.64022
2005	8	17	4.29687	4.45092
2005	8	18	4.47083	4.77194
2005	8	19	4.27041	4.6122
2005	8	20	4.09433	4.10392
2005	8	21	4.15894	4.31343
2005	8	22	4.65332	4.75291
2005	8	23	4.31838	4.77057
2005	8	24	3.92925	4.36268
2005	8	25	4.14054	4.43033
2005	8	26	4.28899	4.35501
2005	8	27	3.82093	4.67585
2005	8	28	4.31479	4.41605
2005	8	29	4.49655	4.51598
2005	8	30	5.15951	4.81843
2005	8	31	5.56846	5.43926
2005	9	1	3.89969	4.41663
2005	9	2	3.50501	3.77097
2005	9	3	3.57928	3.3926
2005	9	4	3.41784	3.43963
2005	9	5	4.52685	4.84138
2005	9	6	4.19789	4.40752
2005	9	7	3.89352	3.98525
2005	9	8	3.721	3.98128
2005	9	9	3.69969	3.79568
2005	9	10	3.79006	3.86025
2005	9	11	3.67317	3.84487
2005	9	12	3.79247	3.94197
2005	9	13	4.0687	3.9845
2005	9	14	3.90626	3.76303
2005	9	15	3.46421	3.6269
2005	9	16	3.57914	3.42015
2005	9	17	3.3329	3.35183
2005	9	18	3.50163	3.42521
2005	9	19	3.80119	3.68431
2005	9	20	3.38089	3.52472
2005	9	21	3.39845	3.44834
2005	9	22	3.5474	3.76797
2005	9	23	3.10929	3.3968
2005	9	24	3.26562	3.26155
2005	9	25	3.47669	3.40224
2005	9	26	3.3759	3.33959
2005	9	27	3.55719	3.34034
2005	9	28	3.35063	2.71393
2005	9	29	2.67584	2.00378
2005	9	30	3.27086	3.12147
2005	10	1	2.52222	2.79708
2005	10	2	2.31574	2.50998
2005	10	3	2.17546	2.55539
2005	10	4	2.5302	2.72305
2005	10	5	3.17183	3.27036
2005	10	6	2.45144	2.51647
2005	10	7	2.51178	2.50286
2005	10	8	2.77993	2.8312
2005	10	9	2.28129	2.2592
2005	10	10	2.71601	2.73184
2005	10	11	2.40032	2.11775
2005	10	12	2.57564	2.54992
2005	10	13	2.30297	2.26006
2005	10	14	2.48685	2.5413
2005	10	15	2.35576	2.44921
2005	10	16	1.99246	1.70925
2005	10	17	2.17745	2.39205
2005	10	18	1.77202	1.65467
2005	10	19	1.69377	1.54898
2005	10	20	2.41688	2.5214
2005	10	21	2.15042	2.17633
2005	10	22	2.63795	2.69797
2005	10	23	2.65998	2.69943
2005	10	24	2.57568	2.53864
2005	10	25	2.55369	2.46983
2005	10	26	2.40688	2.27687
2005	10	27	2.40996	2.21363
2005	10	28	2.23304	2.04464
2005	10	29	2.64117	2.31135
2005	10	30	3.22206	3.30167
2005	10	31	1.99434	1.90645
2006	4	1	3.5914	2.75636
2006	4	2	2.34546	1.30021
2006	4	3	3.23451	3.22873
2006	4	4	3.22383	2.81344
2006	4	5	2.37853	2.15708
2006	4	6	3.09866	2.85948
2006	4	7	2.72249	1.31132
2006	4	8	3.0368	2.40407
2006	4	9	4.66178	4.31795
2006	4	10	2.92135	2.75191
2006	4	11	3.00154	2.80484
2006	4	12	2.63523	1.54354
2006	4	13	2.43479	1.74568
2006	4	14	4.17379	3.2609
2006	4	15	4.48158	3.42227
2006	4	16	3.18982	2.95427
2006	4	17	2.79748	2.1686
2006	4	18	2.58574	2.02123
2006	4	19	3.66261	3.23245
2006	4	20	3.10235	2.08584
2006	4	21	2.95651	2.686
2006	4	22	3.25963	2.63664
2006	4	23	4.72943	4.43176
2006	4	24	2.26205	1.69509
2006	4	25	4.1029	4.48065
2006	4	26	4.9408	5.12457
2006	4	27	3.88687	3.73464
2006	4	28	3.42446	2.71432
2006	4	29	4.66529	4.46582
2006	4	30	2.92151	3.19683
2006	5	1	3.30557	3.65864
2006	5	2	3.65334	3.3341
2006	5	3	3.95028	3.59908
2006	5	4	4.2984	4.05389
2006	5	5	3.74566	3.74217
2006	5	6	3.99106	3.91591
2006	5	7	4.22458	4.27744
2006	5	8	4.52682	4.41856
2006	5	9	4.01885	4.01009
2006	5	10	4.10788	3.82659
2006	5	11	4.13927	3.93051
2006	5	12	4.69513	4.3841
2006	5	13	4.3235	4.14507
2006	5	14	4.72494	4.63984
2006	5	15	4.955	4.82275
2006	5	16	3.85098	4.06377
2006	5	17	3.38657	1.95859
2006	5	18	4.04377	3.715
2006	5	19	4.32098	4.27776
2006	5	20	4.38815	4.4277
2006	5	21	3.97578	3.8992
2006	5	22	4.79712	4.12418
2006	5	23	4.47657	4.2883
2006	5	24	5.647	5.14722
2006	5	25	5.73437	5.26407
2006	5	26	5.06841	5.09749
2006	5	27	3.98472	4.64269
2006	5	28	4.29559	4.54611
2006	5	29	4.83343	4.70326
2006	5	30	4.96703	4.71553
2006	5	31	5.05077	5.12061
2006	6	1	4.898	4.18723
2006	6	2	5.05604	4.57206
2006	6	3	4.97141	4.58931
2006	6	4	5.09625	4.76791
2006	6	5	5.05903	4.66345
2006	6	6	4.73038	4.88012
2006	6	7	4.47695	4.6472
2006	6	8	4.34615	4.539
2006	6	9	4.25164	4.87548
2006	6	10	4.6172	4.79764
2006	6	11	4.57102	4.72279
2006	6	12	4.89336	4.77337
2006	6	13	4.41163	4.24388
2006	6	14	4.39465	4.38993
2006	6	15	4.53269	4.73192
2006	6	16	4.20267	4.57301
2006	6	17	4.7829	4.78335
2006	6	18	5.26746	5.13708
2006	6	19	5.4024	5.14249
2006	6	20	4.9282	5.04497
2006	6	21	5.17435	5.00706
2006	6	22	4.42552	4.47936
2006	6	23	4.08363	4.19186
2006	6	24	4.45791	4.58157
2006	6	25	4.44537	4.37191
2006	6	26	4.14061	4.53283
2006	6	27	3.81342	4.06517
2006	6	28	4.19155	4.48126
2006	6	29	3.45594	3.29135
2006	6	30	4.76027	4.43993
2006	7	1	4.31191	4.88943
2006	7	2	4.32813	4.86667
2006	7	3	4.25268	4.27635
2006	7	4	4.13473	4.12296
2006	7	5	4.54701	4.04286
2006	7	6	4.38551	4.52825
2006	7	7	4.55455	4.64129
2006	7	8	4.45702	5.0027
2006	7	9	4.60866	4.89278
2006	7	10	4.18899	4.71649
2006	7	11	4.13338	4.56961
2006	7	12	4.25258	4.94785
2006	7	13	4.29335	4.02385
2006	7	14	3.80724	3.78516
2006	7	15	3.93314	4.39966
2006	7	16	4.37153	4.7519
2006	7	17	4.34589	4.7087
2006	7	18	4.55109	4.9382
2006	7	19	4.51516	5.04274
2006	7	20	4.37044	5.23547
2006	7	21	4.04009	4.89071
2006	7	22	4.08204	4.68969
2006	7	23	3.98767	4.49569
2006	7	24	4.16472	4.55306
2006	7	25	4.50949	4.76202
2006	7	26	4.07713	4.59293
2006	7	27	4.21409	4.58788
2006	7	28	4.28159	4.70448
2006	7	29	4.83418	5.17081
2006	7	30	4.88908	5.13462
2006	7	31	4.35415	4.75746
2006	8	1	3.85696	3.70155
2006	8	2	3.81459	4.34451
2006	8	3	4.0656	4.52237
2006	8	4	3.9158	4.34809
2006	8	5	3.87358	4.0246
2006	8	6	3.93206	4.63425
2006	8	7	3.56504	3.89184
2006	8	8	3.68669	4.12569
2006	8	9	3.98695	4.22441
2006	8	10	4.17033	4.46025
2006	8	11	3.71961	4.27274
2006	8	12	3.94452	4.43756
2006	8	13	3.55237	4.17695
2006	8	14	3.68231	4.37501
2006	8	15	4.07845	4.42898
2006	8	16	4.3584	4.42331
2006	8	17	3.87102	4.10358
2006	8	18	4.52342	4.50104
2006	8	19	3.94858	4.34792
2006	8	20	5.2573	4.82157
2006	8	21	4.92366	4.71776
2006	8	22	4.55343	4.63438
2006	8	23	4.4687	4.5866
2006	8	24	4.46745	4.40482
2006	8	25	4.51344	4.1965
2006	8	26	3.95426	4.1408
2006	8	27	4.05258	4.07479
2006	8	28	3.80383	3.77646
2006	8	29	3.98323	4.04853
2006	8	30	4.38273	4.41592
2006	8	31	4.08635	4.00916
2006	9	1	3.4818	4.02728
2006	9	2	3.39114	3.56987
2006	9	3	3.56167	3.88211
2006	9	4	3.71374	4.03276
2006	9	5	4.30645	4.43215
2006	9	6	3.87438	4.09067
2006	9	7	4.37154	4.55303
2006	9	8	3.69861	4.01186
2006	9	9	3.56627	3.90415
2006	9	10	4.07273	3.75003
2006	9	11	3.34111	3.6737
2006	9	12	3.69573	3.82066
2006	9	13	4.02673	4.22516
2006	9	14	3.63961	3.72833
2006	9	15	3.67825	3.67658
2006	9	16	3.64731	3.70807
2006	9	17	4.02156	3.87539
2006	9	18	3.93236	3.63578
2006	9	19	3.72572	3.42965
2006	9	20	3.28095	3.59311
2006	9	21	3.4313	3.37526
2006	9	22	3.25234	2.488
2006	9	23	2.98187	2.62585
2006	9	24	3.30168	3.42699
2006	9	25	2.16469	1.7188
2006	9	26	3.06457	3.01052
2006	9	27	3.26936	3.36888
2006	9	28	3.21454	3.02835
2006	9	29	2.66385	1.81639
2006	9	30	3.64444	3.49886
2006	10	1	2.20541	2.25355
2006	10	2	2.41323	2.71782
2006	10	3	2.52232	2.80439
2006	10	4	2.50031	2.67124
2006	10	5	2.66327	2.79674
2006	10	6	2.5781	2.59554
2006	10	7	2.55195	2.57476
2006	10	8	2.43354	2.47708
2006	10	9	2.32469	2.51622
2006	10	10	2.38164	2.34815
2006	10	11	2.41033	2.40451
2006	10	12	2.3239	2.43372
2006	10	13	2.53951	2.36718
2006	10	14	2.20988	2.0704
2006	10	15	2.11004	1.89906
2006	10	16	2.28585	2.31234
2006	10	17	1.70885	1.4479
2006	10	18	2.6315	2.69053
2006	10	19	2.77185	2.79183
2006	10	20	1.76424	1.63213
2006	10	21	2.13092	2.19557
2006	10	22	2.08616	2.07583
2006	10	23	2.20849	2.30914
2006	10	24	2.61367	2.36738
2006	10	25	2.1069	2.16965
2006	10	26	2.13964	2.09703
2006	10	27	2.53886	2.67266
2006	10	28	2.55463	2.63792
2006	10	29	1.80821	1.55673
2006	10	30	1.53625	1.35195
2006	10	31	2.20048	1.88982
2007	4	1	2.59067	2.67629
2007	4	2	2.93138	2.34337
2007	4	3	3.09593	3.13778
2007	4	4	3.175	3.18716
2007	4	5	3.06848	2.36937
2007	4	6	3.14976	2.76001
2007	4	7	3.36892	3.22839
2007	4	8	3.7841	3.54639
2007	4	9	3.13528	3.42316
2007	4	10	3.02788	3.09639
2007	4	11	3.20116	3.44586
2007	4	12	3.00095	2.79605
2007	4	13	3.61086	3.47624
2007	4	14	3.20825	3.33368
2007	4	15	2.62935	1.88839
2007	4	16	3.10358	2.89014
2007	4	17	2.94607	2.1315
2007	4	18	3.47824	3.3883
2007	4	19	3.72134	3.8519
2007	4	20	3.11417	3.35241
2007	4	21	3.54489	3.42849
2007	4	22	3.84049	3.68291
2007	4	23	4.171	4.03422
2007	4	24	4.77284	5.00589
2007	4	25	3.67313	3.62528
2007	4	26	3.88344	3.23934
2007	4	27	4.31324	4.63314
2007	4	28	3.82826	3.6025
2007	4	29	2.81731	2.74517
2007	4	30	3.38429	3.70345
2007	5	1	3.63832	3.62779
2007	5	2	3.95326	3.78939
2007	5	3	5.13854	4.49223
2007	5	4	5.42423	4.88894
2007	5	5	4.79851	4.32567
2007	5	6	5.70004	4.93332
2007	5	7	6.3177	5.40366
2007	5	8	4.98469	4.27562
2007	5	9	3.51929	2.62954
2007	5	10	3.75582	2.35344
2007	5	11	3.44082	1.51823
2007	5	12	3.35404	2.14777
2007	5	13	3.28682	2.94602
2007	5	14	3.62911	3.76519
2007	5	15	4.44472	4.2576
2007	5	16	4.6914	4.16407
2007	5	17	2.80823	2.3731
2007	5	18	2.73302	1.96422
2007	5	19	4.59477	4.38134
2007	5	20	5.73995	5.25933
2007	5	21	3.55931	3.81657
2007	5	22	4.42738	4.30204
2007	5	23	4.23502	4.22705
2007	5	24	4.40855	4.53353
2007	5	25	5.55602	4.83317
2007	5	26	3.8608	4.1658
2007	5	27	4.042	4.35265
2007	5	28	3.60117	4.35049
2007	5	29	3.80956	3.69744
2007	5	30	5.63486	4.97604
2007	5	31	3.76949	4.2422
2007	6	1	3.71966	4.31502
2007	6	2	4.11394	3.76198
2007	6	3	4.25711	4.34815
2007	6	4	4.34751	3.77687
2007	6	5	4.40757	4.49834
2007	6	6	4.28975	4.34861
2007	6	7	3.80824	5.4638
2007	6	8	4.17056	4.1224
2007	6	9	3.97499	2.81097
2007	6	10	4.19436	3.65501
2007	6	11	3.77398	4.10636
[truncated: 2,711 more rows]

## Sheet: ETO(-U,-ea) & Statistics
Year	Month	Day	ETo-missing-u-ea	ETo-full data
#	#	#	mm/day	mm/day
1998	4	1	3.14907	2.74032
1998	4	2	2.70429	2.12095
1998	4	3	3.13121	2.7115		RMSE, mm/day	MBE, mm/day	MAE, mm/day	RE	d
1998	4	4	3.58107	3.40971		0.5594	0.268079	0.446921	0.132106	0.933577
1998	4	5	3.72803	2.97971
1998	4	6	3.74412	3.09217
1998	4	7	3.90435	3.00852
1998	4	8	3.86352	3.08144
1998	4	9	4.1211	3.24399
1998	4	10	4.38246	3.19565
1998	4	11	4.61974	3.6759
1998	4	12	4.64357	4.0979
1998	4	13	4.68354	3.99706
1998	4	14	4.62065	3.31898
1998	4	15	3.52146	2.1991
1998	4	16	5.00692	3.91926
1998	4	17	2.82864	1.72878
1998	4	18	4.03152	3.51869
1998	4	19	3.65692	3.01571
1998	4	20	3.44837	3.17907
1998	4	21	3.44177	3.42363
1998	4	22	3.18054	2.86054
1998	4	23	3.6724	3.23816
1998	4	24	3.91792	3.36769
1998	4	25	3.41899	2.52586
1998	4	26	2.45057	1.57045
1998	4	27	2.63259	1.81772
1998	4	28	3.30738	2.72374
1998	4	29	3.51985	2.79605
1998	4	30	3.7634	3.08039
1998	5	1	4.37321	3.62705
1998	5	2	4.51974	3.60159
1998	5	3	4.3965	3.29516
1998	5	4	4.87146	4.28883
1998	5	5	4.66527	4.21028
1998	5	6	4.5315	3.30881
1998	5	7	3.69668	2.38763
1998	5	8	4.65875	3.70605
1998	5	9	4.52275	3.57096
1998	5	10	3.88593	2.84752
1998	5	11	4.0569	3.23132
1998	5	12	3.93192	3.54937
1998	5	13	3.70327	3.00557
1998	5	14	3.44819	2.63219
1998	5	15	3.97915	3.30085
1998	5	16	4.43924	3.70953
1998	5	17	3.7893	2.63077
1998	5	18	3.08894	1.96566
1998	5	19	4.09642	3.31648
1998	5	20	3.36259	2.70039
1998	5	21	4.16255	3.67976
1998	5	22	3.73611	2.83079
1998	5	23	3.80791	2.88726
1998	5	24	4.75146	3.94708
1998	5	25	5.01966	4.18654
1998	5	26	5.09483	3.88993
1998	5	27	5.04455	3.80194
1998	5	28	4.68046	4.03916
1998	5	29	4.84125	4.30259
1998	5	30	4.58747	3.87223
1998	5	31	3.92947	2.85622
1998	6	1	4.79521	4.05917
1998	6	2	4.655	3.77364
1998	6	3	4.58578	3.66492
1998	6	4	5.06283	4.34613
1998	6	5	5.58775	4.68956
1998	6	6	5.12654	4.37128
1998	6	7	4.91774	4.092
1998	6	8	5.03062	4.16576
1998	6	9	4.66009	3.65447
1998	6	10	4.9767	4.13359
1998	6	11	5.1432	4.3687
1998	6	12	4.42485	3.19814
1998	6	13	5.37919	4.70793
1998	6	14	5.41082	4.75514
1998	6	15	5.37221	4.75326
1998	6	16	5.16432	4.35097
1998	6	17	5.5015	4.60282
1998	6	18	5.06978	4.10278
1998	6	19	5.41732	4.57929
1998	6	20	4.5172	3.17543
1998	6	21	4.85171	3.95576
1998	6	22	5.0107	4.37528
1998	6	23	5.34243	4.71393
1998	6	24	5.52061	4.70857
1998	6	25	5.46489	4.7761
1998	6	26	5.35849	4.71793
1998	6	27	5.19441	4.43791
1998	6	28	5.52603	4.68043
1998	6	29	5.60877	4.78025
1998	6	30	5.61921	4.9225
1998	7	1	5.44381	4.88838
1998	7	2	5.45708	4.83581
1998	7	3	5.6734	5.23286
1998	7	4	5.50827	5.03514
1998	7	5	4.94216	4.16164
1998	7	6	4.49984	3.27821
1998	7	7	4.94896	4.07609
1998	7	8	5.0528	4.27676
1998	7	9	4.95593	4.24753
1998	7	10	5.33639	4.78799
1998	7	11	5.35257	4.79299
1998	7	12	5.40615	4.86931
1998	7	13	5.4387	4.86279
1998	7	14	5.45887	4.86661
1998	7	15	5.38048	4.76198
1998	7	16	5.01692	4.20147
1998	7	17	5.01566	4.16327
1998	7	18	5.15376	4.29616
1998	7	19	5.39541	4.65753
1998	7	20	5.28472	4.52982
1998	7	21	5.30298	4.41038
1998	7	22	5.42	4.56028
1998	7	23	5.44202	4.59775
1998	7	24	4.75823	3.43404
1998	7	25	4.42888	2.8483
1998	7	26	4.79088	3.681
1998	7	27	4.96289	3.84385
1998	7	28	5.36403	4.50138
1998	7	29	5.25764	4.44112
1998	7	30	5.10774	4.18523
1998	7	31	4.99813	3.90703
1998	8	1	4.85208	3.98641
1998	8	2	4.97177	4.24335
1998	8	3	4.99954	4.21297
1998	8	4	4.97753	4.08808
1998	8	5	5.24094	4.29983
1998	8	6	5.33412	4.21813
1998	8	7	5.42402	4.10563
1998	8	8	5.42648	4.14009
1998	8	9	5.33466	4.09314
1998	8	10	5.1284	4.37034
1998	8	11	4.99743	4.1518
1998	8	12	5.0351	4.25506
1998	8	13	5.13202	4.23917
1998	8	14	5.07544	4.14241
1998	8	15	4.8541	3.98341
1998	8	16	5.18292	4.28676
1998	8	17	5.09392	3.8303
1998	8	18	5.05823	4.04083
1998	8	19	4.81818	4.03215
1998	8	20	4.88668	4.14786
1998	8	21	4.87681	4.12475
1998	8	22	4.8179	3.98336
1998	8	23	4.82059	3.89594
1998	8	24	4.84766	3.87157
1998	8	25	4.71852	3.61109
1998	8	26	4.6243	3.40043
1998	8	27	4.68736	3.49473
1998	8	28	4.58982	3.40567
1998	8	29	4.6033	3.38292
1998	8	30	4.49364	3.25851
1998	8	31	4.45383	3.18417
1998	9	1	4.20715	3.32426
1998	9	2	4.24132	3.53744
1998	9	3	4.24419	3.20326
1998	9	4	4.2841	2.94821
1998	9	5	4.14052	3.12055
1998	9	6	4.14873	3.2588
1998	9	7	4.11357	3.08034
1998	9	8	4.32641	3.02103
1998	9	9	4.35699	3.08539
1998	9	10	4.3116	3.12641
1998	9	11	4.22013	3.17911
1998	9	12	4.04337	2.9102
1998	9	13	3.74994	2.58751
1998	9	14	4.10353	3.07473
1998	9	15	3.95107	2.72175
1998	9	16	3.99234	2.96048
1998	9	17	3.97924	2.96109
1998	9	18	4.08275	3.00306
1998	9	19	3.79533	2.65451
1998	9	20	3.85421	2.8131
1998	9	21	3.86657	2.69085
1998	9	22	3.5861	2.44217
1998	9	23	3.28573	2.09179
1998	9	24	3.76479	2.54536
1998	9	25	3.90518	2.67062
1998	9	26	3.92579	2.52097
1998	9	27	4.01033	2.51857
1998	9	28	4.10243	2.57165
1998	9	29	4.03619	2.65635
1998	9	30	3.74901	2.83603
1998	10	1	3.18857	3.21431
1998	10	2	3.1646	2.14163
1998	10	3	3.15736	2.08954
1998	10	4	3.15553	2.22411
1998	10	5	3.17038	2.25717
1998	10	6	3.16241	2.16295
1998	10	7	3.20842	2.10569
1998	10	8	3.26627	3.36281
1998	10	9	3.3526	4.92998
1998	10	10	3.40429	2.25836
1998	10	11	3.38404	1.86237
1998	10	12	3.41709	2.4295
1998	10	13	3.33418	3.43373
1998	10	14	3.33926	2.91891
1998	10	15	3.18626	2.38487
1998	10	16	2.84969	2.11101
1998	10	17	2.94968	2.70931
1998	10	18	2.96117	2.32329
1998	10	19	2.88272	1.80462
1998	10	20	2.96403	1.82445
1998	10	21	3.05294	1.91375
1998	10	22	3.09679	1.77961
1998	10	23	3.06615	1.92421
1998	10	24	3.09891	1.61982
1998	10	25	2.82024	1.94455
1998	10	26	2.71986	1.64281
1998	10	27	2.70373	1.52408
1998	10	28	2.42155	0.998312
1998	10	29	2.54986	2.27589
1998	10	30	2.53218	1.62723
1998	10	31	2.51908	1.61344
1999	4	1	3.06571	2.74429
1999	4	2	3.13316	2.93531
1999	4	3	2.48385	2.05916
1999	4	4	3.20467	2.82063
1999	4	5	3.14334	2.54663
1999	4	6	3.1397	3.00976
1999	4	7	2.1692	1.44237
1999	4	8	3.51585	3.13267
1999	4	9	3.61504	3.08318
1999	4	10	3.3532	2.7143
1999	4	11	3.58653	2.97943
1999	4	12	2.17758	1.29144
1999	4	13	3.56655	3.21721
1999	4	14	3.40587	3.00448
1999	4	15	4.07174	3.61892
1999	4	16	4.32866	3.81686
1999	4	17	4.07543	3.35977
1999	4	18	4.04842	3.19844
1999	4	19	4.11645	3.60617
1999	4	20	3.42475	2.79159
1999	4	21	3.57259	2.84647
1999	4	22	4.32678	4.09525
1999	4	23	4.41035	3.8604
1999	4	24	4.26199	3.41976
1999	4	25	4.94648	4.23201
1999	4	26	4.92349	4.17961
1999	4	27	4.64148	4.36974
1999	4	28	4.42004	3.98304
1999	4	29	4.07918	3.47763
1999	4	30	4.67689	4.14429
1999	5	1	4.97118	4.06634
1999	5	2	5.28033	4.37638
1999	5	3	5.06299	4.57585
1999	5	4	5.26581	4.63627
1999	5	5	5.3852	4.54521
1999	5	6	5.44142	4.72414
1999	5	7	4.31681	3.61626
1999	5	8	4.94205	4.57145
1999	5	9	4.46504	3.85949
1999	5	10	4.9023	4.39409
1999	5	11	5.0597	4.45045
1999	5	12	5.35456	4.44969
1999	5	13	4.78287	4.33985
1999	5	14	4.57192	3.88814
1999	5	15	4.87875	4.15395
1999	5	16	5.17365	4.54897
1999	5	17	4.9521	4.40331
1999	5	18	4.95906	4.22811
1999	5	19	5.29242	4.71097
1999	5	20	5.44004	6.94367
1999	5	21	5.32262	4.46551
1999	5	22	5.52193	4.44944
1999	5	23	5.51189	4.8167
1999	5	24	5.51508	5.13201
1999	5	25	5.21248	5.10375
1999	5	26	3.62102	2.57421
1999	5	27	5.3176	4.58211
1999	5	28	5.79326	4.7543
1999	5	29	5.02782	4.52086
1999	5	30	5.01782	4.62624
1999	5	31	5.30257	4.86613
1999	6	1	5.41812	4.87181
1999	6	2	5.548	5.06725
1999	6	3	5.48671	5.13605
1999	6	4	5.37081	4.85821
1999	6	5	5.43577	5.10476
1999	6	6	5.29202	4.7682
1999	6	7	5.62685	5.21998
1999	6	8	5.48157	5.03481
1999	6	9	5.36744	4.84037
1999	6	10	5.37851	4.81498
1999	6	11	4.62489	3.71829
1999	6	12	5.31693	4.80763
1999	6	13	5.09927	4.58811
1999	6	14	4.36562	3.20425
1999	6	15	5.24864	4.5665
1999	6	16	5.54262	4.95011
1999	6	17	5.85068	5.41882
1999	6	18	5.79756	5.5327
1999	6	19	5.64397	5.27686
1999	6	20	5.71944	5.42484
1999	6	21	5.59996	5.17223
1999	6	22	5.31028	4.7595
1999	6	23	5.37077	5.12882
1999	6	24	5.17732	4.70103
1999	6	25	5.39833	5.04808
1999	6	26	4.99545	4.41492
1999	6	27	5.32755	4.63808
1999	6	28	5.36665	4.66811
1999	6	29	5.85378	5.56526
1999	6	30	5.75667	5.43392
1999	7	1	5.70181	5.48408
1999	7	2	5.23666	4.71909
1999	7	3	5.1819	4.6185
1999	7	4	5.50094	5.13198
1999	7	5	5.52766	5.18473
1999	7	6	5.62419	5.38275
1999	7	7	5.70387	5.52007
1999	7	8	5.321	4.90379
1999	7	9	5.69678	5.50193
1999	7	10	5.84192	5.71504
1999	7	11	5.8368	5.78041
1999	7	12	5.90538	5.89731
1999	7	13	5.81241	5.62847
1999	7	14	5.73579	5.58003
1999	7	15	5.41188	4.99788
1999	7	16	4.82057	3.9637
1999	7	17	5.50319	4.89905
1999	7	18	5.43924	4.96996
1999	7	19	5.487	5.15062
1999	7	20	5.71079	5.52974
1999	7	21	5.92781	5.76884
1999	7	22	6.01263	5.58686
1999	7	23	5.49201	5.14532
1999	7	24	5.72274	5.51501
1999	7	25	5.71581	5.49964
1999	7	26	5.05562	4.18713
1999	7	27	5.16969	4.39678
1999	7	28	5.32768	4.8573
1999	7	29	5.48888	5.10895
1999	7	30	5.13005	4.41928
1999	7	31	5.05173	4.23597
1999	8	1	5.04558	4.66775
1999	8	2	4.93123	4.37055
1999	8	3	4.93634	4.45862
1999	8	4	4.9285	4.42042
1999	8	5	4.95596	4.51388
1999	8	6	5.04943	4.62172
1999	8	7	5.28811	5.08391
1999	8	8	5.22645	4.93861
1999	8	9	5.02783	4.68245
1999	8	10	4.95119	4.3802
1999	8	11	5.02697	4.36222
1999	8	12	5.21652	4.94573
1999	8	13	5.27356	5.07655
1999	8	14	5.23978	4.98144
1999	8	15	4.91728	4.3247
1999	8	16	4.84718	4.16255
1999	8	17	4.93258	4.2336
1999	8	18	5.05719	4.35994
1999	8	19	5.4124	4.95661
1999	8	20	4.93205	4.28404
1999	8	21	4.75365	3.8248
1999	8	22	4.76375	3.97582
1999	8	23	4.58029	3.48823
1999	8	24	4.77416	4.03244
1999	8	25	4.85204	4.32928
1999	8	26	5.21107	4.48733
1999	8	27	5.25034	4.5282
1999	8	28	5.24408	5.10568
1999	8	29	5.18516	4.53118
1999	8	30	5.23285	4.36339
1999	8	31	5.11635	4.66558
1999	9	1	4.3607	4.19153
1999	9	2	4.33442	3.95688
1999	9	3	4.48893	4.40916
1999	9	4	4.26202	3.83658
1999	9	5	4.28	3.96049
1999	9	6	4.19713	3.65806
1999	9	7	4.31852	3.61916
1999	9	8	4.41548	3.93489
1999	9	9	4.15033	3.48499
1999	9	10	4.1305	3.4373
1999	9	11	4.23732	3.82892
1999	9	12	3.4778	2.21081
1999	9	13	3.93941	3.19168
1999	9	14	3.85464	3.03059
1999	9	15	3.74724	2.84909
1999	9	16	4.24324	3.50099
1999	9	17	4.30051	3.42056
1999	9	18	4.28068	3.32453
1999	9	19	4.2225	3.72573
1999	9	20	3.87055	3.07226
1999	9	21	4.10064	3.41931
1999	9	22	4.31444	3.41287
1999	9	23	4.35629	3.09536
1999	9	24	4.30818	3.15393
1999	9	25	4.0903	3.17268
1999	9	26	4.4296	3.42187
1999	9	27	4.46268	3.06821
1999	9	28	4.50865	3.03709
1999	9	29	4.49831	3.28872
1999	9	30	4.54359	4.16677
1999	10	1	3.45058	2.88109
1999	10	2	3.19124	2.62288
1999	10	3	3.18798	2.67829
1999	10	4	3.23617	2.64881
1999	10	5	3.28443	2.67231
1999	10	6	3.20501	2.4658
1999	10	7	3.13647	2.19778
1999	10	8	3.17543	2.35027
1999	10	9	2.84711	1.63327
1999	10	10	3.06315	2.34846
1999	10	11	2.84919	1.92525
1999	10	12	3.08591	3.23339
1999	10	13	3.13097	2.40093
1999	10	14	3.14742	2.09874
1999	10	15	2.96619	2.25406
1999	10	16	3.00946	2.328
1999	10	17	2.95708	2.21236
1999	10	18	2.92747	2.23611
1999	10	19	3.06453	2.16295
1999	10	20	2.98144	2.22651
1999	10	21	3.00447	2.16905
1999	10	22	3.05407	2.23718
1999	10	23	2.6803	1.45379
1999	10	24	2.93388	2.27819
1999	10	25	2.64795	1.56294
1999	10	26	3.08513	2.05384
1999	10	27	3.06909	1.71744
1999	10	28	2.86923	2.09963
1999	10	29	3.01643	2.30175
1999	10	30	3.00077	2.17241
1999	10	31	2.99318	3.76474
2000	4	1	3.83591	2.73968
2000	4	2	4.35842	4.30299
2000	4	3	3.80995	2.94107
2000	4	4	3.44228	2.49095
2000	4	5	3.33245	2.21264
2000	4	6	4.10489	3.34009
2000	4	7	3.80601	3.3978
2000	4	8	3.50836	3.07515
2000	4	9	2.26801	1.75199
2000	4	10	3.41544	3.21447
2000	4	11	2.67504	2.24428
2000	4	12	3.3932	3.09944
2000	4	13	3.50742	3.38433
2000	4	14	3.52023	2.88831
2000	4	15	3.65581	2.86629
2000	4	16	4.31604	3.46448
2000	4	17	4.49677	4.02944
2000	4	18	4.38532	4.52404
2000	4	19	3.59868	2.91399
2000	4	20	2.1738	1.28895
2000	4	21	2.99823	2.1727
2000	4	22	2.64541	1.72482
2000	4	23	3.25765	2.4681
2000	4	24	3.06779	2.27408
2000	4	25	3.59897	2.99893
2000	4	26	4.28446	3.73798
2000	4	27	4.72522	4.10551
2000	4	28	2.68409	1.38814
2000	4	29	3.03673	2.19522
2000	4	30	3.57487	2.84599
2000	5	1	4.73711	4.07173
2000	5	2	4.41267	3.51992
2000	5	3	4.47653	3.56468
2000	5	4	4.30243	3.70653
2000	5	5	3.02465	2.04949
2000	5	6	3.04527	2.13104
2000	5	7	4.12344	3.43816
2000	5	8	4.83507	4.17686
2000	5	9	4.97117	4.38754
2000	5	10	5.3103	4.37948
2000	5	11	5.26726	4.36966
2000	5	12	5.38639	4.37159
2000	5	13	5.1733	4.59678
2000	5	14	5.04155	4.41673
2000	5	15	4.59412	3.73612
2000	5	16	4.5111	3.63137
2000	5	17	3.58069	2.44684
2000	5	18	5.02401	4.39218
2000	5	19	4.73039	4.17496
2000	5	20	4.45026	3.62352
2000	5	21	4.81518	4.13689
2000	5	22	5.04873	4.41023
2000	5	23	4.28011	3.41057
2000	5	24	4.31168	3.38072
2000	5	25	4.79238	4.22418
2000	5	26	4.85769	4.11745
2000	5	27	5.41592	4.70512
2000	5	28	5.59686	4.93343
2000	5	29	5.45063	4.94506
2000	5	30	4.68995	3.86764
2000	5	31	5.3533	4.79328
2000	6	1	5.88709	5.16976
2000	6	2	5.72186	5.13763
2000	6	3	5.25528	4.75857
2000	6	4	5.16082	4.37111
2000	6	5	5.46238	4.83088
2000	6	6	5.50511	5.04519
2000	6	7	4.84204	4.11802
2000	6	8	5.41055	4.87823
2000	6	9	6.06578	5.68218
2000	6	10	3.96907	2.39974
2000	6	11	6.04132	5.38605
2000	6	12	6.0002	5.15584
2000	6	13	6.47684	6.49051
2000	6	14	6.46943	8.00331
2000	6	15	6.41797	6.46703
2000	6	16	6.17377	5.00005
2000	6	17	5.80941	4.96818
2000	6	18	5.51442	5.08707
2000	6	19	5.79013	5.7593
2000	6	20	5.77954	6.02753
2000	6	21	5.81688	4.98268
2000	6	22	5.97884	5.19022
2000	6	23	5.82069	5.23162
2000	6	24	5.8266	5.14083
2000	6	25	5.91967	5.49887
2000	6	26	5.76976	5.35083
2000	6	27	5.64704	5.19051
2000	6	28	5.40691	4.77148
2000	6	29	5.82819	5.47042
2000	6	30	5.82605	5.19975
2000	7	1	5.76028	5.21082
2000	7	2	5.73914	5.20686
2000	7	3	6.10876	5.62704
2000	7	4	6.11535	5.4032
2000	7	5	6.15995	5.42583
2000	7	6	5.91235	5.21942
2000	7	7	5.90901	5.35252
2000	7	8	6.00999	5.37314
2000	7	9	6.1409	5.44364
2000	7	10	5.60948	5.21695
2000	7	11	5.62211	5.18942
2000	7	12	5.88884	5.49089
2000	7	13	5.82828	5.49597
2000	7	14	5.21738	4.41606
2000	7	15	5.487	4.99207
2000	7	16	5.58396	5.11253
2000	7	17	5.3071	4.56291
2000	7	18	5.22089	4.4702
2000	7	19	5.47811	4.91793
2000	7	20	5.42236	4.85706
2000	7	21	5.64013	4.99259
2000	7	22	5.68182	5.05333
2000	7	23	5.45191	4.77328
2000	7	24	5.61499	5.05377
2000	7	25	5.85955	5.14466
2000	7	26	5.8117	5.17206
2000	7	27	5.66775	5.12652
2000	7	28	5.72749	5.31539
2000	7	29	5.56417	4.73429
2000	7	30	5.66085	4.96481
2000	7	31	5.66216	5.19403
2000	8	1	5.37717	4.96485
2000	8	2	5.48685	5.40864
2000	8	3	5.549	5.34695
2000	8	4	5.58535	5.92903
2000	8	5	5.40723	4.5018
2000	8	6	5.33825	4.6677
2000	8	7	5.24205	4.72231
2000	8	8	5.15824	4.67203
2000	8	9	5.12627	4.57779
2000	8	10	4.87692	4.06374
2000	8	11	4.87876	4.03314
2000	8	12	4.64178	3.56279
2000	8	13	4.80605	3.82692
2000	8	14	5.04384	4.4024
2000	8	15	5.53889	4.5289
2000	8	16	5.47108	4.49977
2000	8	17	5.21867	4.6453
2000	8	18	5.11789	4.51948
2000	8	19	4.86524	4.08643
2000	8	20	4.97871	4.26498
2000	8	21	5.1226	4.31716
2000	8	22	5.18434	4.238
2000	8	23	4.93756	4.15628
2000	8	24	4.58142	3.4213
2000	8	25	4.95461	4.14682
2000	8	26	4.4961	3.4461
2000	8	27	4.60476	3.53677
2000	8	28	5.1311	4.23003
2000	8	29	5.22722	4.03413
2000	8	30	5.05709	3.99477
2000	8	31	5.31021	4.42871
2000	9	1	4.53698	4.08638
2000	9	2	4.45918	4.16393
2000	9	3	4.1313	3.58876
2000	9	4	4.35446	4.02355
2000	9	5	4.40309	4.16469
2000	9	6	4.06405	3.55424
2000	9	7	4.23279	4.34013
2000	9	8	4.31068	3.89098
2000	9	9	4.34273	3.87097
2000	9	10	4.52953	4.0496
2000	9	11	4.39367	3.83821
2000	9	12	4.27177	3.99942
2000	9	13	4.10363	3.64368
2000	9	14	3.97921	3.38232
2000	9	15	4.1257	3.46296
2000	9	16	4.09554	3.42142
2000	9	17	3.94597	3.26846
2000	9	18	4.20672	3.60655
2000	9	19	4.37048	3.79975
2000	9	20	4.51985	3.8403
2000	9	21	4.50671	3.61951
2000	9	22	4.59142	5.11739
2000	9	23	4.46062	3.79524
2000	9	24	4.07216	3.50817
2000	9	25	4.00133	3.34495
2000	9	26	3.78098	3.06965
2000	9	27	3.96487	3.2229
2000	9	28	3.12082	2.20895
2000	9	29	3.03987	2.03451
2000	9	30	3.83115	3.21166
2000	10	1	3.29297	2.58738
2000	10	2	3.31661	2.94186
2000	10	3	3.38895	2.55043
2000	10	4	3.37257	3.23137
2000	10	5	3.38371	3.31783
2000	10	6	3.40198	2.77961
2000	10	7	3.22782	2.79359
2000	10	8	2.95854	2.43763
2000	10	9	3.08349	2.74717
2000	10	10	2.63678	1.51194
2000	10	11	2.94061	2.44175
2000	10	12	2.97196	2.19843
2000	10	13	3.21034	2.89319
2000	10	14	3.22374	3.468
2000	10	15	3.18115	3.38268
2000	10	16	3.19266	2.60365
2000	10	17	3.11093	2.57686
2000	10	18	3.01001	2.58936
2000	10	19	3.00796	2.29272
2000	10	20	2.14646	0.930601
2000	10	21	2.75568	2.29461
2000	10	22	2.50975	1.89415
2000	10	23	2.51907	1.85284
2000	10	24	1.84818	1.30468
2000	10	25	2.21416	1.59209
2000	10	26	2.63268	1.87461
2000	10	27	2.72737	2.07709
2000	10	28	2.5741	1.95004
2000	10	29	2.07471	1.05567
2000	10	30	2.66296	2.26771
2000	10	31	2.68376	2.33413
2001	4	1	4.42357	4.46101
2001	4	2	2.85283	1.6958
2001	4	3	3.9323	3.47675
2001	4	4	3.6656	3.2574
2001	4	5	3.38835	2.95191
2001	4	6	3.1584	2.78482
2001	4	7	3.28912	2.96776
2001	4	8	4.11753	3.8918
2001	4	9	3.77609	3.31822
2001	4	10	3.33663	2.83829
2001	4	11	3.41386	3.2366
2001	4	12	4.04379	3.96323
2001	4	13	3.74374	3.36142
2001	4	14	2.63009	1.96264
2001	4	15	3.64692	3.45722
2001	4	16	3.567	3.14691
2001	4	17	3.79534	3.50472
2001	4	18	3.98024	3.70887
2001	4	19	4.11322	3.89711
2001	4	20	4.3987	3.9823
2001	4	21	4.11396	3.36446
2001	4	22	3.74152	3.50126
2001	4	23	4.49637	4.5255
2001	4	24	4.25553	4.33928
2001	4	25	4.31876	4.33103
2001	4	26	4.06064	3.83245
2001	4	27	4.54098	4.22546
2001	4	28	4.75398	4.86903
2001	4	29	5.153	5.56483
2001	4	30	5.14933	5.60161
2001	5	1	4.40126	4.43129
2001	5	2	5.34017	6.144
2001	5	3	4.14713	3.82617
2001	5	4	4.67252	4.49215
2001	5	5	4.95432	4.54459
2001	5	6	3.67904	3.04615
2001	5	7	4.36836	3.91936
2001	5	8	3.16638	2.24441
2001	5	9	2.89969	2.06196
2001	5	10	2.92279	2.01975
2001	5	11	2.95378	1.9682
2001	5	12	4.47836	4.03798
2001	5	13	4.11353	3.91107
2001	5	14	4.49839	4.24509
2001	5	15	3.85404	3.14528
2001	5	16	4.29178	3.73313
2001	5	17	5.13644	4.82024
2001	5	18	5.48062	5.15848
2001	5	19	5.571	5.24794
2001	5	20	5.05985	4.73052
2001	5	21	5.72735	5.42606
2001	5	22	5.49503	5.04552
2001	5	23	5.65233	5.10573
2001	5	24	5.72288	5.99639
2001	5	25	5.65626	6.67583
2001	5	26	5.41825	4.96882
2001	5	27	5.59203	5.16007
2001	5	28	5.37622	5.07738
2001	5	29	5.60406	5.66953
2001	5	30	5.39841	5.25863
2001	5	31	5.52379	5.30772
2001	6	1	6.07169	5.59181
2001	6	2	6.0429	5.64575
2001	6	3	5.9565	5.76467
2001	6	4	5.57427	5.26427
2001	6	5	5.16334	4.8275
2001	6	6	5.18538	5.22663
2001	6	7	5.66149	5.49244
2001	6	8	5.43966	5.18366
2001	6	9	5.70376	5.50466
2001	6	10	6.09234	6.02251
2001	6	11	6.26596	6.06561
2001	6	12	6.28337	5.95407
2001	6	13	6.20977	5.84806
2001	6	14	6.11381	5.89648
2001	6	15	5.82549	5.83636
2001	6	16	4.88469	4.31944
2001	6	17	6.15313	6.91959
2001	6	18	5.91002	5.81187
2001	6	19	5.84321	5.75463
2001	6	20	5.81606	5.65404
2001	6	21	5.82185	5.73459
2001	6	22	5.88754	6.10709
2001	6	23	5.5592	5.30728
2001	6	24	5.81425	5.63866
2001	6	25	5.67641	5.54935
2001	6	26	5.66102	5.49453
2001	6	27	5.29392	4.78015
2001	6	28	5.70626	5.43555
2001	6	29	6.01841	6.05242
2001	6	30	6.26885	6.22867
2001	7	1	5.51091	5.38833
2001	7	2	5.54914	5.42159
2001	7	3	5.38964	5.11683
2001	7	4	5.30641	5.0974
2001	7	5	5.31318	5.05726
2001	7	6	5.66591	5.72079
2001	7	7	5.46181	5.30945
2001	7	8	5.80023	5.89591
2001	7	9	6.16395	6.36804
2001	7	10	5.8751	5.88971
2001	7	11	5.77089	5.73157
2001	7	12	5.71637	5.65372
2001	7	13	5.29488	4.95756
2001	7	14	5.35043	5.02329
2001	7	15	5.10569	4.55002
2001	7	16	5.08091	4.48206
2001	7	17	5.49921	5.25309
2001	7	18	5.50665	5.3914
2001	7	19	5.36848	5.07135
2001	7	20	5.75396	5.65297
2001	7	21	5.75137	5.81372
2001	7	22	5.61617	5.38762
2001	7	23	5.79634	5.64344
2001	7	24	5.58894	5.39834
2001	7	25	5.42661	5.21436
2001	7	26	5.33879	5.02422
2001	7	27	5.3746	5.0006
2001	7	28	4.88235	3.94294
2001	7	29	5.01863	4.24374
2001	7	30	5.06364	4.3377
2001	7	31	4.92622	4.11314
2001	8	1	5.1686	5.20024
2001	8	2	5.08004	4.91945
2001	8	3	5.23551	5.12823
2001	8	4	4.88883	4.43011
2001	8	5	5.13786	5.07979
2001	8	6	4.99786	4.70145
2001	8	7	5.21887	5.12883
2001	8	8	5.08298	4.80051
2001	8	9	5.10959	4.89024
2001	8	10	5.39072	5.32482
2001	8	11	5.23872	5.19406
2001	8	12	4.94683	4.55816
2001	8	13	4.94993	4.56617
2001	8	14	5.15873	5.03396
2001	8	15	5.25616	5.12698
2001	8	16	5.09044	4.83303
2001	8	17	5.09778	5.05542
2001	8	18	4.72279	4.36459
2001	8	19	4.67222	4.06163
2001	8	20	5.07588	4.8656
2001	8	21	5.14266	4.94314
2001	8	22	5.29716	5.12019
2001	8	23	5.1995	5.03992
2001	8	24	5.21984	5.15174
2001	8	25	5.2145	5.06307
2001	8	26	5.05473	4.81599
2001	8	27	5.27281	5.115
2001	8	28	5.07316	4.8241
2001	8	29	5.03343	4.80778
2001	8	30	4.91866	4.6959
2001	8	31	4.95466	4.75357
2001	9	1	4.53317	4.47903
2001	9	2	4.58391	4.42924
2001	9	3	4.41319	4.38848
2001	9	4	4.30735	4.10853
2001	9	5	4.34956	4.40874
2001	9	6	4.25216	4.19897
2001	9	7	3.84457	3.22627
2001	9	8	4.22773	4.22871
2001	9	9	4.09974	3.81327
2001	9	10	4.37715	4.24178
2001	9	11	4.13859	3.70131
2001	9	12	4.19827	3.87476
2001	9	13	4.25996	4.01048
2001	9	14	4.14943	3.76844
2001	9	15	4.19582	4.00941
2001	9	16	4.23979	3.88635
2001	9	17	4.31664	3.97942
2001	9	18	4.30923	3.97065
2001	9	19	4.26162	3.93323
2001	9	20	4.35589	4.00407
2001	9	21	4.3064	3.85015
2001	9	22	4.30045	3.71384
2001	9	23	4.33119	3.72106
2001	9	24	4.27124	3.84246
2001	9	25	4.2357	3.74329
2001	9	26	4.10287	3.45832
2001	9	27	4.11276	3.64527
2001	9	28	4.09795	3.8273
2001	9	29	4.08542	3.90785
2001	9	30	4.05185	3.71615
2001	10	1	3.316	2.99028
2001	10	2	3.35788	2.92933
2001	10	3	3.4898	2.81854
2001	10	4	3.43922	3.08717
2001	10	5	3.12538	2.75694
2001	10	6	3.21045	3.22805
2001	10	7	3.22864	2.99889
2001	10	8	3.43505	2.93042
2001	10	9	3.46728	4.35388
2001	10	10	3.26768	2.87194
2001	10	11	3.25817	2.7577
2001	10	12	3.30459	2.70728
2001	10	13	3.51916	2.36746
2001	10	14	3.14074	2.46397
2001	10	15	3.1119	2.62431
2001	10	16	3.11767	2.76616
2001	10	17	3.11404	2.54656
2001	10	18	3.07402	2.57795
2001	10	19	3.04925	2.95936
2001	10	20	3.07858	2.39935
2001	10	21	3.13901	2.59149
2001	10	22	3.00806	2.46627
2001	10	23	2.96012	2.67812
2001	10	24	2.90277	2.64184
2001	10	25	2.76558	3.03664
2001	10	26	2.84664	3.63422
2001	10	27	2.81758	2.85303
2001	10	28	2.15419	1.53496
2001	10	29	2.32268	1.81676
2001	10	30	2.50532	1.99102
2001	10	31	2.64698	1.96357
2002	4	1	1.85369	1.53546
2002	4	2	2.36626	1.98592
2002	4	3	3.62225	3.288
2002	4	4	2.33455	1.67658
2002	4	5	3.7052	3.33261
2002	4	6	2.84046	1.92789
2002	4	7	3.6784	3.30571
2002	4	8	3.33147	2.93949
2002	4	9	3.46732	3.31957
2002	4	10	3.91461	3.69638
2002	4	11	4.12923	3.96889
2002	4	12	4.0844	3.63671
2002	4	13	2.671	1.81506
2002	4	14	4.06715	3.4274
2002	4	15	3.24554	2.47895
2002	4	16	2.90689	1.95728
2002	4	17	3.88009	3.62063
2002	4	18	3.50789	2.94741
2002	4	19	2.55414	1.79813
2002	4	20	3.14915	2.76972
2002	4	21	3.54946	3.18008
2002	4	22	2.93284	2.13044
2002	4	23	3.33082	2.70571
2002	4	24	2.81496	2.17836
2002	4	25	3.80275	3.3889
2002	4	26	3.71174	3.34027
2002	4	27	3.81951	3.44821
2002	4	28	4.23076	3.954
2002	4	29	3.90183	3.4884
2002	4	30	4.32402	3.95451
2002	5	1	4.65781	4.23509
2002	5	2	3.21501	2.3895
2002	5	3	4.19536	3.69969
2002	5	4	4.36673	3.88989
2002	5	5	4.22757	3.72093
2002	5	6	5.09891	4.81647
2002	5	7	4.62777	4.26487
2002	5	8	4.48897	4.14161
2002	5	9	4.93856	4.8285
2002	5	10	4.87218	4.58899
2002	5	11	4.72823	4.49398
2002	5	12	4.33948	3.81513
2002	5	13	4.43413	3.89265
2002	5	14	3.36206	2.45442
2002	5	15	3.59575	2.87881
2002	5	16	4.76114	4.40795
2002	5	17	4.97204	4.31658
2002	5	18	3.30743	2.4038
2002	5	19	4.54912	4.00557
2002	5	20	4.92788	4.48821
2002	5	21	4.65578	4.22899
2002	5	22	4.91124	4.51183
2002	5	23	3.94021	3.27202
2002	5	24	4.94766	4.61788
2002	5	25	5.19644	4.85464
2002	5	26	5.67673	5.32793
2002	5	27	4.90262	4.49287
2002	5	28	4.77786	4.39414
2002	5	29	4.59087	4.02274
2002	5	30	4.88116	4.58925
2002	5	31	4.81348	4.53689
2002	6	1	4.15756	3.18313
2002	6	2	5.07438	4.6623
2002	6	3	5.48255	5.20299
2002	6	4	4.96179	4.55623
2002	6	5	4.3453	3.67692
2002	6	6	5.23491	4.93375
2002	6	7	5.72031	5.37389
2002	6	8	5.84124	4.9303
2002	6	9	5.89717	5.49133
2002	6	10	5.98683	5.52072
2002	6	11	5.48861	5.47261
2002	6	12	5.01371	4.74747
2002	6	13	5.38113	5.02829
2002	6	14	5.70267	5.44521
2002	6	15	5.60645	5.3582
2002	6	16	5.17561	4.74165
2002	6	17	5.05068	4.54077
2002	6	18	5.36454	5.13659
2002	6	19	5.73685	6.75725
2002	6	20	5.68546	6.19138
2002	6	21	5.95823	7.51953
2002	6	22	5.72094	5.38212
2002	6	23	5.5906	5.39072
2002	6	24	5.55735	5.22538
2002	6	25	5.462	5.10903
2002	6	26	4.75819	3.8961
2002	6	27	5.44998	5.03295
2002	6	28	5.18203	4.65925
2002	6	29	5.56815	5.35527
2002	6	30	5.78773	5.68488
2002	7	1	5.39726	5.04168
2002	7	2	5.2013	4.6613
2002	7	3	5.29165	4.84904
2002	7	4	5.69311	5.55604
2002	7	5	5.75443	5.72507
2002	7	6	5.72336	5.62484
2002	7	7	5.73176	5.6402
2002	7	8	5.27328	4.99157
2002	7	9	5.11296	4.70982
2002	7	10	5.34767	5.1667
2002	7	11	5.02945	4.52065
2002	7	12	5.10562	4.58957
2002	7	13	4.94735	4.25163
2002	7	14	5.02121	4.31455
2002	7	15	5.62696	5.35668
2002	7	16	5.72556	5.61327
2002	7	17	5.81942	5.8019
2002	7	18	5.78735	5.72462
2002	7	19	5.61041	5.43484
2002	7	20	5.66908	5.55924
2002	7	21	5.55013	5.23125
2002	7	22	5.36065	4.95703
2002	7	23	5.36927	5.03883
2002	7	24	5.90059	6.65979
2002	7	25	5.78212	5.95942
2002	7	26	5.49517	5.329
2002	7	27	5.40662	5.09231
2002	7	28	5.64294	5.45092
2002	7	29	5.84936	5.57728
2002	7	30	5.8145	5.59705
2002	7	31	5.84007	5.59529
2002	8	1	5.31818	5.33185
2002	8	2	5.2201	5.60477
2002	8	3	4.85557	4.50297
2002	8	4	4.99875	4.54122
2002	8	5	5.0225	4.76047
2002	8	6	5.08164	4.9582
2002	8	7	5.29802	5.18527
2002	8	8	4.93984	4.81974
2002	8	9	4.86745	4.60315
2002	8	10	5.17122	4.96406
2002	8	11	5.34585	5.34546
2002	8	12	5.56295	5.66269
2002	8	13	5.36934	5.40699
2002	8	14	4.9953	4.928
2002	8	15	4.90863	4.67316
2002	8	16	4.68877	4.17677
2002	8	17	4.61855	4.17924
2002	8	18	4.32303	3.31666
2002	8	19	4.87484	4.37036
2002	8	20	4.91232	4.5184
2002	8	21	4.74601	4.25968
2002	8	22	4.93166	4.55493
2002	8	23	5.16285	4.91813
2002	8	24	5.19893	4.97452
2002	8	25	5.13117	4.92916
2002	8	26	5.22354	5.00399
2002	8	27	5.29021	4.93154
2002	8	28	5.08046	4.71022
2002	8	29	4.99126	4.86456
2002	8	30	4.9234	4.56524
2002	8	31	4.66423	4.14941
2002	9	1	4.20266	3.97581
2002	9	2	4.31913	4.18005
2002	9	3	4.2885	4.14112
2002	9	4	4.22715	4.04602
2002	9	5	4.04273	3.54231
2002	9	6	4.15685	3.8464
2002	9	7	3.96304	3.40561
2002	9	8	4.11559	3.67758
2002	9	9	4.26133	4.03185
2002	9	10	3.97406	3.31849
2002	9	11	3.97504	3.59597
2002	9	12	3.75972	3.23729
2002	9	13	4.11105	3.75802
2002	9	14	4.11359	3.62782
2002	9	15	4.06863	3.68398
2002	9	16	4.19772	3.67305
2002	9	17	4.18569	3.78813
2002	9	18	4.0871	3.87318
2002	9	19	4.23843	4.32194
2002	9	20	4.21638	3.62614
2002	9	21	4.37622	3.9602
2002	9	22	4.43843	4.15627
2002	9	23	4.03427	3.49633
2002	9	24	3.93613	3.15119
2002	9	25	4.06289	3.41097
2002	9	26	3.99909	3.28084
2002	9	27	3.89337	3.14065
2002	9	28	3.96995	3.43173
2002	9	29	4.14238	3.39985
2002	9	30	4.30314	3.31849
2002	10	1	3.49227	2.78046
2002	10	2	2.97236	1.98066
2002	10	3	3.17537	3.08205
2002	10	4	3.19538	2.66046
2002	10	5	3.10681	2.65277
2002	10	6	3.23949	2.7363
2002	10	7	2.98404	1.96004
2002	10	8	3.10289	2.55881
2002	10	9	3.14977	2.55378
2002	10	10	3.33384	2.65602
2002	10	11	3.42511	2.66633
2002	10	12	3.45041	2.65359
2002	10	13	3.42806	2.7336
2002	10	14	3.01378	1.8316
2002	10	15	3.07518	2.66097
2002	10	16	2.84186	1.96396
2002	10	17	3.2122	2.13427
2002	10	18	3.26865	2.52691
2002	10	19	3.25361	2.46584
2002	10	20	3.00853	2.25592
2002	10	21	2.96193	3.81198
2002	10	22	2.93345	2.62094
2002	10	23	2.97181	2.24123
2002	10	24	3.15258	2.21084
2002	10	25	3.07371	2.08859
2002	10	26	3.08908	2.1744
2002	10	27	2.99196	2.27737
2002	10	28	3.00025	2.1909
2002	10	29	2.79965	2.22505
2002	10	30	2.83789	3.73411
2002	10	31	2.848	2.22904
2003	4	1	3.32445	2.99259
2003	4	2	2.4931	2.35287
2003	4	3	3.33433	3.16313
2003	4	4	3.99306	3.73815
2003	4	5	3.95999	3.78239
2003	4	6	3.65818	3.84597
2003	4	7	3.32755	3.00331
2003	4	8	3.9673	3.72032
2003	4	9	3.59986	3.42812
2003	4	10	3.55334	3.31858
2003	4	11	4.14683	3.83932
2003	4	12	4.2862	3.83067
2003	4	13	4.06215	3.68871
2003	4	14	2.9171	2.08426
2003	4	15	2.23661	1.44931
2003	4	16	3.81916	3.32203
2003	4	17	2.91125	2.0137
2003	4	18	2.34712	1.63594
2003	4	19	3.53367	3.42779
2003	4	20	2.95262	2.31818
2003	4	21	3.14149	2.62057
2003	4	22	3.52995	3.13678
2003	4	23	2.65902	2.01448
2003	4	24	3.58536	3.51757
2003	4	25	2.17224	1.01636
2003	4	26	2.67153	2.18971
2003	4	27	3.78975	4.19685
2003	4	28	4.02046	3.8482
2003	4	29	3.35391	2.90478
2003	4	30	4.32665	3.78062
2003	5	1	4.97843	4.68524
2003	5	2	5.52536	5.67676
2003	5	3	5.84638	5.16127
2003	5	4	5.89232	5.39597
2003	5	5	5.66798	5.30736
2003	5	6	5.68645	5.34394
2003	5	7	5.66307	6.93122
2003	5	8	5.73946	6.50763
2003	5	9	5.87479	6.17696
2003	5	10	5.90236	5.87816
2003	5	11	5.9254	5.77667
2003	5	12	5.8267	5.30852
2003	5	13	5.90543	5.21726
2003	5	14	5.43955	5.46076
2003	5	15	4.78764	4.21416
2003	5	16	5.1241	4.72843
2003	5	17	5.3395	4.55348
2003	5	18	5.55587	5.21905
2003	5	19	5.52643	5.28778
2003	5	20	5.4748	5.15958
2003	5	21	5.11675	4.67023
2003	5	22	5.08822	4.72355
2003	5	23	5.23529	5.03451
2003	5	24	5.42585	4.94353
2003	5	25	5.40186	5.46132
2003	5	26	4.98508	4.86623
2003	5	27	5.16429	4.89367
2003	5	28	4.51051	3.98446
2003	5	29	4.09101	3.18624
2003	5	30	3.70747	2.95091
2003	5	31	3.43383	2.36862
2003	6	1	4.9673	4.49216
2003	6	2	4.57332	3.88288
2003	6	3	4.96252	4.43513
2003	6	4	5.35998	4.87725
2003	6	5	6.06916	6.17669
2003	6	6	6.16336	6.02311
2003	6	7	6.15303	5.67673
2003	6	8	4.29226	3.16381
2003	6	9	4.93011	4.3511
2003	6	10	4.82802	4.06771
2003	6	11	5.09325	4.54371
2003	6	12	4.87559	4.1812
2003	6	13	5.66001	5.24422
2003	6	14	5.80903	5.59882
2003	6	15	5.80364	5.63862
2003	6	16	5.70891	5.47385
2003	6	17	5.18742	4.68541
2003	6	18	5.71857	5.54025
2003	6	19	5.78304	5.59297
2003	6	20	5.45907	5.18259
2003	6	21	5.08743	4.5104
2003	6	22	5.03713	4.45969
2003	6	23	5.6902	5.42122
2003	6	24	5.87115	5.76902
2003	6	25	6.35389	6.11068
2003	6	26	5.83867	5.6294
2003	6	27	5.47552	5.07363
2003	6	28	5.27347	4.68692
2003	6	29	5.59292	5.29741
2003	6	30	5.77898	5.70774
2003	7	1	5.86401	5.91088
2003	7	2	5.69019	5.55066
2003	7	3	5.85376	5.72415
2003	7	4	5.82562	5.76501
2003	7	5	5.90724	5.92507
2003	7	6	4.83587	4.01945
2003	7	7	5.26178	4.77281
2003	7	8	5.54818	5.34512
2003	7	9	5.12021	4.69514
2003	7	10	5.55472	5.20797
2003	7	11	5.66147	5.51269
2003	7	12	5.6385	5.56036
2003	7	13	5.40212	5.25678
2003	7	14	5.26524	4.88398
2003	7	15	5.33156	4.94282
2003	7	16	5.51289	5.31529
2003	7	17	5.48146	5.25279
2003	7	18	5.5926	5.44032
2003	7	19	5.77722	5.80401
2003	7	20	5.72204	5.57669
2003	7	21	5.58919	5.27952
2003	7	22	5.7132	5.34253
2003	7	23	5.8449	5.48498
2003	7	24	5.77447	5.1952
2003	7	25	5.62293	5.05565
2003	7	26	5.71878	5.22715
2003	7	27	5.63314	5.00425
2003	7	28	5.54719	5.05534
2003	7	29	5.59347	4.92682
2003	7	30	5.61534	5.08994
2003	7	31	5.45424	4.83894
2003	8	1	5.29859	4.98453
2003	8	2	5.34197	4.93868
2003	8	3	5.22678	4.88334
2003	8	4	5.09907	4.57773
2003	8	5	4.86857	4.03817
2003	8	6	5.14585	4.49031
2003	8	7	5.38002	4.77938
2003	8	8	4.75164	3.82767
2003	8	9	5.06203	4.48239
2003	8	10	5.12702	4.60971
2003	8	11	5.17371	4.88063
2003	8	12	5.10695	4.38064
2003	8	13	5.30865	4.68503
2003	8	14	5.34083	4.66228
2003	8	15	5.39429	4.31138
2003	8	16	5.30476	4.29912
2003	8	17	5.32881	4.81289
2003	8	18	5.25415	4.66528
2003	8	19	5.2931	4.30523
2003	8	20	5.25944	4.74232
2003	8	21	4.94687	4.34389
2003	8	22	5.11391	4.53466
2003	8	23	5.24508	4.62343
2003	8	24	5.17306	4.53009
2003	8	25	4.85917	4.05276
2003	8	26	4.95154	4.29932
2003	8	27	4.70644	3.79939
2003	8	28	4.83041	3.96663
2003	8	29	4.94526	4.16643
2003	8	30	5.04273	4.4036
2003	8	31	5.10061	4.53355
2003	9	1	4.44121	4.19789
2003	9	2	4.30253	3.78758
2003	9	3	4.29849	3.76332
2003	9	4	4.12136	3.41733
2003	9	5	3.96239	3.21656
2003	9	6	4.26994	4.15795
2003	9	7	4.33233	4.40854
2003	9	8	4.32195	3.71475
2003	9	9	4.12386	3.57583
2003	9	10	4.06147	3.33092
2003	9	11	3.84816	2.92158
2003	9	12	4.05641	3.48673
2003	9	13	3.94361	3.37991
2003	9	14	4.01402	3.3308
2003	9	15	3.88484	3.01699
2003	9	16	3.98867	3.12525
2003	9	17	3.68081	2.81931
2003	9	18	4.22177	4.25021
2003	9	19	4.26244	3.6508
2003	9	20	4.2111	3.94027
2003	9	21	4.30413	5.25383
2003	9	22	4.37766	4.60163
2003	9	23	4.43574	4.43024
2003	9	24	4.158	3.34673
2003	9	25	3.9029	3.02496
2003	9	26	4.07118	3.22851
2003	9	27	3.96234	3.10891
2003	9	28	3.79766	2.81473
2003	9	29	3.86508	3.10143
2003	9	30	4.05671	3.22169
2003	10	1	2.92169	2.09192
2003	10	2	3.04497	2.34338
2003	10	3	3.18757	2.50199
2003	10	4	3.15448	2.72887
2003	10	5	3.22516	2.67452
2003	10	6	3.40026	2.56747
2003	10	7	3.35966	2.636
2003	10	8	3.09664	2.35601
2003	10	9	3.15194	2.14622
2003	10	10	3.19388	2.44195
2003	10	11	3.16469	2.66544
2003	10	12	3.13617	2.32684
2003	10	13	3.17636	2.20156
2003	10	14	3.26131	2.17391
2003	10	15	3.33976	2.51234
2003	10	16	3.13081	2.47779
2003	10	17	3.08023	2.25216
2003	10	18	2.97188	2.12833
2003	10	19	2.97726	2.16608
2003	10	20	2.9067	1.81148
2003	10	21	3.02713	2.07486
2003	10	22	3.10075	2.14656
2003	10	23	3.20269	2.21895
2003	10	24	2.826	1.39588
2003	10	25	3.08567	2.11295
2003	10	26	2.91752	1.98092
2003	10	27	3.03628	2.83799
2003	10	28	2.60536	2.05671
2003	10	29	2.22073	2.87199
2003	10	30	2.05635	1.9119
2003	10	31	1.55665	0.901856
2004	4	1	3.77218	2.9297
2004	4	2	3.31314	3.37115
2004	4	3	3.89303	4.43566
2004	4	4	3.53046	4.83576
2004	4	5	3.44981	3.60639
2004	4	6	3.39101	2.5232
2004	4	7	3.77441	3.19949
2004	4	8	4.04819	3.03281
2004	4	9	4.37162	3.00628
2004	4	10	4.55718	3.90843
2004	4	11	4.60932	3.96105
2004	4	12	4.63578	3.94319
2004	4	13	4.22543	3.58973
2004	4	14	3.89586	3.15324
2004	4	15	3.93171	3.65896
2004	4	16	3.70887	4.16895
2004	4	17	3.50633	3.51024
2004	4	18	2.25037	1.62017
2004	4	19	4.05621	3.67218
2004	4	20	3.68429	2.99138
2004	4	21	2.30381	1.3051
2004	4	22	3.71961	3.19388
2004	4	23	3.09127	2.56773
2004	4	24	3.52164	3.03731
2004	4	25	3.87603	3.24242
2004	4	26	4.50517	4.21538
2004	4	27	4.47859	5.29978
2004	4	28	4.34062	3.95551
2004	4	29	4.67253	4.41352
2004	4	30	3.37123	2.73672
2004	5	1	4.3417	3.7965
2004	5	2	3.86785	3.56917
2004	5	3	3.81217	2.84516
2004	5	4	3.99946	3.36377
2004	5	5	4.29111	3.64407
2004	5	6	4.65163	3.78425
2004	5	7	5.06254	4.60659
2004	5	8	3.91367	3.11332
2004	5	9	4.26943	3.59026
2004	5	10	5.22053	5.95142
2004	5	11	3.79685	3.025
2004	5	12	4.48393	3.88778
2004	5	13	4.56581	4.22465
2004	5	14	4.4261	3.97434
2004	5	15	3.94254	3.17949
2004	5	16	4.46457	3.98997
2004	5	17	3.62847	2.68841
2004	5	18	4.30875	4.22434
2004	5	19	4.19593	3.6808
2004	5	20	4.95909	4.7613
2004	5	21	5.06139	4.68892
2004	5	22	4.83405	4.37355
2004	5	23	4.72989	4.337
2004	5	24	4.88469	4.44895
2004	5	25	4.92836	4.4818
2004	5	26	4.90291	4.51651
2004	5	27	4.84035	4.40731
2004	5	28	5.06916	4.576
2004	5	29	4.75598	4.25154
2004	5	30	4.988	4.56051
2004	5	31	4.46514	3.61743
2004	6	1	4.58444	4.17014
2004	6	2	4.61185	3.94516
2004	6	3	4.85343	4.34686
2004	6	4	5.09562	4.60341
2004	6	5	5.42044	4.78592
2004	6	6	5.40798	4.89911
2004	6	7	5.3521	5.0586
2004	6	8	4.82362	4.3531
2004	6	9	5.24091	4.8826
2004	6	10	5.50057	5.19806
2004	6	11	5.49159	5.26073
2004	6	12	5.514	5.1128
2004	6	13	5.54318	5.13054
2004	6	14	5.47584	5.06913
2004	6	15	5.50067	5.24307
2004	6	16	5.25397	4.85636
2004	6	17	5.23521	4.90701
2004	6	18	5.35279	4.92615
2004	6	19	4.99929	4.30464
2004	6	20	5.3458	5.12719
2004	6	21	5.1295	4.56553
2004	6	22	5.00382	4.31993
2004	6	23	4.84801	4.17248
2004	6	24	5.17145	4.64124
2004	6	25	5.1105	4.54733
2004	6	26	5.37637	4.95063
2004	6	27	5.59228	5.32793
2004	6	28	5.51097	5.23187
2004	6	29	5.89959	6.00069
2004	6	30	5.85954	5.38292
2004	7	1	5.59981	5.20188
2004	7	2	5.79674	5.57544
2004	7	3	5.52125	5.33506
2004	7	4	5.49047	5.26054
2004	7	5	5.69943	5.5344
2004	7	6	5.99761	5.75361
2004	7	7	5.8031	5.57937
2004	7	8	5.49397	5.21603
2004	7	9	4.97815	4.36678
2004	7	10	5.83489	5.6467
2004	7	11	5.72215	5.67838
2004	7	12	5.43685	5.1478
2004	7	13	5.50111	5.24597
2004	7	14	5.16152	4.61886
2004	7	15	5.45175	5.69289
2004	7	16	5.24537	4.85597
2004	7	17	5.65203	5.46293
2004	7	18	5.59806	5.34573
2004	7	19	5.69305	5.57853
2004	7	20	5.64354	5.36121
2004	7	21	5.32037	5.04865
2004	7	22	5.5306	5.28247
2004	7	23	5.58067	5.34559
2004	7	24	5.37367	4.98856
2004	7	25	5.18632	4.85871
2004	7	26	5.04592	4.37658
2004	7	27	4.93629	4.17411
2004	7	28	4.91482	4.09475
2004	7	29	5.26383	4.76613
2004	7	30	5.39618	4.88448
2004	7	31	5.2222	4.67656
2004	8	1	4.72508	4.19839
2004	8	2	4.90078	4.6071
2004	8	3	4.7648	4.2743
2004	8	4	4.89398	4.48312
2004	8	5	4.81311	4.26912
2004	8	6	4.82194	4.34
2004	8	7	4.73307	4.11036
2004	8	8	4.61484	3.97043
2004	8	9	4.84009	4.33918
2004	8	10	4.60485	3.83328
2004	8	11	4.47737	3.86332
2004	8	12	5.14459	4.99379
2004	8	13	5.21037	4.99371
2004	8	14	5.1974	4.98959
2004	8	15	4.87891	4.52236
2004	8	16	4.78847	4.37666
2004	8	17	4.80525	4.34923
2004	8	18	4.89059	4.54891
2004	8	19	4.89617	4.44587
2004	8	20	4.96152	4.60074
2004	8	21	4.86748	4.47626
2004	8	22	4.96124	4.61037
2004	8	23	4.79338	4.27766
2004	8	24	5.00187	4.56685
2004	8	25	5.15027	4.77129
2004	8	26	5.10047	4.8437
2004	8	27	5.06425	4.74284
2004	8	28	4.83986	4.37813
2004	8	29	4.70892	4.22415
2004	8	30	4.77635	4.21399
2004	8	31	4.65164	4.01077
2004	9	1	4.19888	3.80732
2004	9	2	4.18501	3.7648
2004	9	3	4.372	4.1268
2004	9	4	4.29607	4.00992
2004	9	5	4.30264	4.03029
2004	9	6	4.41095	4.55292
2004	9	7	4.34663	4.08527
2004	9	8	4.37531	3.82541
2004	9	9	4.13626	4.05972
2004	9	10	4.05146	3.69105
2004	9	11	4.07681	4.49116
2004	9	12	4.28899	5.99708
2004	9	13	4.113	3.71055
2004	9	14	4.18858	3.80109
2004	9	15	4.30457	3.7376
2004	9	16	4.147	3.80884
2004	9	17	4.11698	3.6277
2004	9	18	4.32368	3.79081
2004	9	19	4.32423	3.54032
2004	9	20	4.33811	3.63537
2004	9	21	4.20729	3.62957
2004	9	22	3.96853	3.39737
2004	9	23	3.90919	3.22833
2004	9	24	4.10312	3.40301
2004	9	25	4.00209	3.38769
2004	9	26	4.05432	3.28832
2004	9	27	4.05267	3.26196
2004	9	28	4.12122	3.34264
2004	9	29	4.17896	3.38194
2004	9	30	4.00322	3.25503
2004	10	1	3.24104	2.85413
2004	10	2	3.24736	3.28062
2004	10	3	3.17	2.49704
2004	10	4	3.23252	2.58601
2004	10	5	3.32502	3.55262
2004	10	6	3.07358	2.45916
2004	10	7	2.95152	2.11594
2004	10	8	3.03879	2.71597
2004	10	9	2.97975	2.50405
2004	10	10	3.03481	2.66027
2004	10	11	3.25152	2.66019
2004	10	12	3.34969	3.03876
2004	10	13	3.18296	2.57017
2004	10	14	3.13957	2.58091
2004	10	15	3.28255	2.55292
2004	10	16	3.24615	2.2935
2004	10	17	3.34703	2.49451
2004	10	18	3.34565	2.63693
2004	10	19	3.31872	2.59633
2004	10	20	3.08323	2.42976
2004	10	21	3.10669	2.76972
2004	10	22	2.97536	2.29695
2004	10	23	3.0712	2.41178
2004	10	24	3.13052	2.85332
2004	10	25	3.16773	3.22765
2004	10	26	3.2682	3.31578
2004	10	27	3.23098	3.49123
2004	10	28	3.26874	2.94075
2004	10	29	2.87061	2.73991
2004	10	30	2.87652	2.03899
2004	10	31	2.98153	2.49222
2005	4	1	3.49694	3.53152
2005	4	2	2.55798	2.18641
2005	4	3	2.05182	1.7393
2005	4	4	2.68276	2.60093
2005	4	5	3.50036	3.48102
2005	4	6	3.61107	3.74359
2005	4	7	3.93027	3.64914
2005	4	8	3.98326	4.78107
2005	4	9	4.2554	4.38098
2005	4	10	4.34612	3.8563
2005	4	11	4.72154	4.40107
2005	4	12	4.69063	4.10114
2005	4	13	4.66302	5.21614
2005	4	14	4.11396	3.97971
2005	4	15	3.61871	3.38203
2005	4	16	3.36244	2.7218
2005	4	17	3.55778	2.98636
2005	4	18	2.60616	1.74854
2005	4	19	3.60233	3.28977
2005	4	20	3.59168	3.35396
2005	4	21	4.113	3.63706
2005	4	22	2.70787	1.57898
2005	4	23	3.92612	3.30563
2005	4	24	4.37737	4.17024
2005	4	25	4.21527	3.85272
2005	4	26	4.20078	3.83784
2005	4	27	3.90864	3.42226
2005	4	28	4.18055	3.69732
2005	4	29	4.02626	3.53528
2005	4	30	3.25102	2.55861
2005	5	1	3.63107	2.8128
2005	5	2	4.2124	3.73506
2005	5	3	4.3523	4.1671
2005	5	4	3.88587	4.14827
2005	5	5	4.52368	4.29405
2005	5	6	3.11558	2.09436
2005	5	7	4.62222	3.83754
2005	5	8	4.11784	3.45264
2005	5	9	4.16332	3.68054
2005	5	10	4.88971	4.39703
2005	5	11	5.32834	4.77312
2005	5	12	5.36184	4.68206
2005	5	13	4.0554	3.39873
2005	5	14	5.16443	4.77669
2005	5	15	5.05436	4.72993
2005	5	16	4.28312	3.56301
2005	5	17	5.12725	4.65547
2005	5	18	5.56698	5.10538
2005	5	19	5.41003	5.08936
2005	5	20	5.32519	4.88349
2005	5	21	4.90994	4.26696
2005	5	22	5.1234	4.8262
2005	5	23	4.69383	4.28684
2005	5	24	4.65322	4.17917
2005	5	25	4.49809	3.90351
2005	5	26	4.71131	4.17682
2005	5	27	4.92655	5.07035
2005	5	28	4.54322	4.04735
2005	5	29	3.94942	3.10672
2005	5	30	3.81157	2.76038
2005	5	31	3.7909	2.67948
2005	6	1	3.44342	2.36364
2005	6	2	4.64026	3.93141
2005	6	3	4.95717	4.27551
2005	6	4	4.98623	4.30083
2005	6	5	5.23776	4.86901
2005	6	6	5.10757	4.76881
2005	6	7	5.50723	5.08581
2005	6	8	5.50875	5.17476
2005	6	9	5.19755	4.77693
2005	6	10	4.09829	2.97982
2005	6	11	4.70118	4.05965
2005	6	12	4.77455	4.28914
2005	6	13	5.06496	4.54264
2005	6	14	5.48445	5.12276
2005	6	15	4.83909	4.24302
2005	6	16	5.39488	5.02778
2005	6	17	5.58847	5.41218
2005	6	18	5.49575	5.10717
2005	6	19	5.13542	4.6277
2005	6	20	5.13797	4.65255
2005	6	21	4.72614	3.95462
2005	6	22	5.38971	5.16341
2005	6	23	5.70663	5.87348
2005	6	24	5.6689	5.37508
2005	6	25	5.49337	5.20871
2005	6	26	5.58724	5.39897
2005	6	27	5.73874	5.59125
2005	6	28	5.6212	5.36748
2005	6	29	5.28038	4.93239
2005	6	30	5.00631	4.49837
2005	7	1	5.33573	5.02707
2005	7	2	5.03365	4.44972
2005	7	3	4.91771	4.37349
2005	7	4	5.15737	4.90506
2005	7	5	4.82528	4.31745
2005	7	6	5.19421	4.79511
2005	7	7	5.19201	4.74117
2005	7	8	5.32062	4.90545
2005	7	9	5.42566	5.11431
2005	7	10	5.35069	4.99024
2005	7	11	5.43325	5.1262
2005	7	12	5.50212	5.22272
2005	7	13	5.31691	4.94527
2005	7	14	4.86373	4.19603
2005	7	15	5.11684	4.70121
2005	7	16	5.10192	4.76058
2005	7	17	5.56699	5.30206
2005	7	18	5.52712	5.28395
2005	7	19	5.61357	5.43091
2005	7	20	5.64354	5.4627
2005	7	21	5.61544	5.37314
2005	7	22	5.34134	4.92728
2005	7	23	5.1287	4.6205
2005	7	24	5.08164	4.56665
2005	7	25	5.07648	4.43228
2005	7	26	5.20373	4.62655
2005	7	27	5.42499	5.10427
2005	7	28	5.31744	4.85798
2005	7	29	5.26025	4.75519
2005	7	30	4.86451	3.99932
2005	7	31	4.64498	3.67164
2005	8	1	4.779	4.24391
2005	8	2	4.5109	3.76002
2005	8	3	5.14878	4.92082
2005	8	4	5.18919	5.04883
2005	8	5	4.93967	4.52673
2005	8	6	5.02289	4.85738
2005	8	7	5.04431	5.03531
2005	8	8	4.97367	4.72425
2005	8	9	5.04745	4.77167
2005	8	10	4.85273	4.42151
2005	8	11	4.97641	4.65816
2005	8	12	5.10962	4.88635
2005	8	13	5.10229	4.94557
2005	8	14	5.19187	5.08021
2005	8	15	5.09343	4.88985
2005	8	16	4.97896	4.64022
2005	8	17	4.87676	4.45092
2005	8	18	5.00961	4.77194
2005	8	19	4.94541	4.6122
2005	8	20	4.70374	4.10392
2005	8	21	4.81519	4.31343
2005	8	22	5.09945	4.75291
2005	8	23	5.03875	4.77057
2005	8	24	4.82353	4.36268
2005	8	25	4.79859	4.43033
2005	8	26	4.76736	4.35501
2005	8	27	4.89156	4.67585
2005	8	28	4.8274	4.41605
2005	8	29	4.95352	4.51598
2005	8	30	5.12179	4.81843
2005	8	31	5.14849	5.43926
2005	9	1	4.34897	4.41663
2005	9	2	4.12798	3.77097
2005	9	3	3.93298	3.3926
2005	9	4	4.0103	3.43963
2005	9	5	4.41033	4.84138
2005	9	6	4.32537	4.40752
2005	9	7	4.26286	3.98525
2005	9	8	4.2574	3.98128
2005	9	9	4.34755	3.79568
2005	9	10	4.11895	3.86025
2005	9	11	4.18617	3.84487
2005	9	12	4.18974	3.94197
2005	9	13	4.28203	3.9845
2005	9	14	4.21966	3.76303
2005	9	15	4.05536	3.6269
2005	9	16	4.08392	3.42015
2005	9	17	3.97528	3.35183
2005	9	18	4.05989	3.42521
2005	9	19	4.1389	3.68431
2005	9	20	4.0727	3.52472
2005	9	21	4.02035	3.44834
2005	9	22	4.07275	3.76797
2005	9	23	3.93153	3.3968
2005	9	24	3.80874	3.26155
2005	9	25	3.78035	3.40224
2005	9	26	3.86537	3.33959
2005	9	27	3.94763	3.34034
2005	9	28	3.67068	2.71393
2005	9	29	3.22638	2.00378
2005	9	30	3.79834	3.12147
2005	10	1	3.1551	2.79708
2005	10	2	3.08277	2.50998
2005	10	3	3.05647	2.55539
2005	10	4	3.2458	2.72305
2005	10	5	3.31488	3.27036
2005	10	6	3.25575	2.51647
2005	10	7	3.25678	2.50286
2005	10	8	3.28566	2.8312
2005	10	9	3.18778	2.2592
2005	10	10	3.30371	2.73184
2005	10	11	2.98019	2.11775
2005	10	12	3.04935	2.54992
2005	10	13	3.22924	2.26006
2005	10	14	3.09646	2.5413
2005	10	15	3.00581	2.44921
2005	10	16	2.64319	1.70925
2005	10	17	2.74163	2.39205
2005	10	18	2.5457	1.65467
2005	10	19	2.20069	1.54898
2005	10	20	2.43234	2.5214
2005	10	21	2.52548	2.17633
2005	10	22	2.73731	2.69797
2005	10	23	2.87345	2.69943
2005	10	24	2.94132	2.53864
2005	10	25	3.0075	2.46983
2005	10	26	3.08696	2.27687
2005	10	27	3.00258	2.21363
2005	10	28	2.80055	2.04464
2005	10	29	2.01256	2.31135
2005	10	30	2.40777	3.30167
2005	10	31	2.13686	1.90645
2006	4	1	3.12011	2.75636
2006	4	2	2.32823	1.30021
2006	4	3	3.6481	3.22873
2006	4	4	3.09249	2.81344
2006	4	5	2.68796	2.15708
2006	4	6	3.38529	2.85948
2006	4	7	2.13927	1.31132
2006	4	8	3.19131	2.40407
2006	4	9	4.12465	4.31795
2006	4	10	3.47124	2.75191
2006	4	11	3.45801	2.80484
2006	4	12	2.51975	1.54354
2006	4	13	2.77284	1.74568
2006	4	14	3.668	3.2609
2006	4	15	3.53559	3.42227
2006	4	16	3.67064	2.95427
2006	4	17	3.00431	2.1686
2006	4	18	2.96719	2.02123
2006	4	19	3.93043	3.23245
2006	4	20	3.32746	2.08584
2006	4	21	3.36477	2.686
2006	4	22	3.38151	2.63664
2006	4	23	4.33734	4.43176
2006	4	24	2.77518	1.69509
2006	4	25	3.9742	4.48065
2006	4	26	4.12545	5.12457
2006	4	27	3.72763	3.73464
2006	4	28	3.30093	2.71432
2006	4	29	4.15922	4.46582
2006	4	30	3.75702	3.19683
2006	5	1	4.19527	3.65864
2006	5	2	3.9591	3.3341
2006	5	3	4.17193	3.59908
2006	5	4	4.53369	4.05389
2006	5	5	4.1658	3.74217
2006	5	6	4.33399	3.91591
2006	5	7	4.70955	4.27744
2006	5	8	4.67919	4.41856
2006	5	9	4.22062	4.01009
2006	5	10	4.31399	3.82659
2006	5	11	4.43223	3.93051
2006	5	12	4.79102	4.3841
2006	5	13	4.63095	4.14507
2006	5	14	4.95163	4.63984
2006	5	15	5.02787	4.82275
2006	5	16	4.50827	4.06377
2006	5	17	2.94129	1.95859
2006	5	18	4.29404	3.715
2006	5	19	4.81368	4.27776
2006	5	20	4.90637	4.4277
2006	5	21	4.50474	3.8992
2006	5	22	4.83643	4.12418
2006	5	23	4.88276	4.2883
2006	5	24	5.60065	5.14722
2006	5	25	5.59261	5.26407
2006	5	26	5.37615	5.09749
2006	5	27	4.98677	4.64269
2006	5	28	4.98187	4.54611
2006	5	29	5.21988	4.70326
2006	5	30	5.24728	4.71553
2006	5	31	5.34299	5.12061
2006	6	1	4.88176	4.18723
2006	6	2	5.0933	4.57206
2006	6	3	5.23623	4.58931
2006	6	4	5.371	4.76791
2006	6	5	5.30119	4.66345
2006	6	6	5.24653	4.88012
2006	6	7	5.07389	4.6472
2006	6	8	4.94537	4.539
2006	6	9	5.02726	4.87548
2006	6	10	5.09585	4.79764
2006	6	11	4.88472	4.72279
2006	6	12	5.1362	4.77337
2006	6	13	4.7573	4.24388
2006	6	14	4.85689	4.38993
2006	6	15	5.09207	4.73192
2006	6	16	5.05231	4.57301
2006	6	17	5.28277	4.78335
2006	6	18	5.44141	5.13708
2006	6	19	5.56144	5.14249
2006	6	20	5.43859	5.04497
2006	6	21	5.32608	5.00706
2006	6	22	5.0602	4.47936
2006	6	23	4.8615	4.19186
2006	6	24	5.15883	4.58157
2006	6	25	5.05849	4.37191
2006	6	26	5.16037	4.53283
2006	6	27	4.86468	4.06517
2006	6	28	5.07258	4.48126
2006	6	29	4.32492	3.29135
2006	6	30	5.11644	4.43993
2006	7	1	5.30131	4.88943
2006	7	2	5.24333	4.86667
2006	7	3	4.86948	4.27635
2006	7	4	4.85262	4.12296
2006	7	5	4.76635	4.04286
2006	7	6	5.06374	4.52825
2006	7	7	5.15039	4.64129
2006	7	8	5.34876	5.0027
2006	7	9	5.28456	4.89278
2006	7	10	5.18211	4.71649
2006	7	11	5.11017	4.56961
2006	7	12	5.30235	4.94785
2006	7	13	4.73469	4.02385
2006	7	14	4.63092	3.78516
2006	7	15	5.01522	4.39966
2006	7	16	5.26013	4.7519
2006	7	17	5.21378	4.7087
2006	7	18	5.34168	4.9382
2006	7	19	5.39181	5.04274
2006	7	20	5.45088	5.23547
2006	7	21	5.25657	4.89071
2006	7	22	5.19452	4.68969
2006	7	23	5.10569	4.49569
2006	7	24	5.15081	4.55306
2006	7	25	5.27108	4.76202
2006	7	26	5.15871	4.59293
2006	7	27	5.14129	4.58788
2006	7	28	5.15017	4.70448
2006	7	29	5.37077	5.17081
2006	7	30	5.34509	5.13462
2006	7	31	5.21466	4.75746
2006	8	1	4.44884	3.70155
2006	8	2	4.83815	4.34451
2006	8	3	4.95682	4.52237
2006	8	4	4.89683	4.34809
2006	8	5	4.69861	4.0246
2006	8	6	4.95141	4.63425
2006	8	7	4.60522	3.89184
2006	8	8	4.72074	4.12569
2006	8	9	4.71502	4.22441
2006	8	10	4.92373	4.46025
2006	8	11	4.80296	4.27274
2006	8	12	4.90672	4.43756
2006	8	13	4.73579	4.17695
2006	8	14	4.83195	4.37501
2006	8	15	4.89953	4.42898
2006	8	16	4.93692	4.42331
2006	8	17	4.76264	4.10358
2006	8	18	4.97105	4.50104
2006	8	19	4.85598	4.34792
2006	8	20	5.18421	4.82157
2006	8	21	5.07819	4.71776
2006	8	22	5.00452	4.63438
2006	8	23	4.95701	4.5866
2006	8	24	4.90169	4.40482
2006	8	25	4.85607	4.1965
2006	8	26	4.75867	4.1408
2006	8	27	4.6648	4.07479
2006	8	28	4.53977	3.77646
2006	8	29	4.6121	4.04853
2006	8	30	4.86447	4.41592
2006	8	31	4.65134	4.00916
2006	9	1	4.20228	4.02728
2006	9	2	4.02327	3.56987
2006	9	3	4.16991	3.88211
2006	9	4	4.28392	4.03276
2006	9	5	4.4768	4.43215
2006	9	6	4.32553	4.09067
2006	9	7	4.39182	4.55303
2006	9	8	4.26163	4.01186
2006	9	9	4.24591	3.90415
2006	9	10	4.42913	3.75003
2006	9	11	4.07821	3.6737
2006	9	12	4.2162	3.82066
2006	9	13	4.33865	4.22516
2006	9	14	4.19912	3.72833
2006	9	15	4.20918	3.67658
2006	9	16	4.22143	3.70807
2006	9	17	4.39979	3.87539
2006	9	18	4.31587	3.63578
2006	9	19	4.06348	3.42965
2006	9	20	3.9942	3.59311
2006	9	21	3.80972	3.37526
2006	9	22	3.55894	2.488
2006	9	23	3.51112	2.62585
2006	9	24	3.87232	3.42699
2006	9	25	2.89082	1.7188
2006	9	26	3.74314	3.01052
2006	9	27	3.94527	3.36888
2006	9	28	3.85792	3.02835
2006	9	29	3.23776	1.81639
2006	9	30	3.90111	3.49886
2006	10	1	3.0519	2.25355
2006	10	2	3.15533	2.71782
2006	10	3	3.20466	2.80439
2006	10	4	3.21338	2.67124
2006	10	5	3.24578	2.79674
2006	10	6	3.29071	2.59554
2006	10	7	3.24677	2.57476
2006	10	8	3.09286	2.47708
2006	10	9	3.1031	2.51622
2006	10	10	3.09333	2.34815
2006	10	11	3.21665	2.40451
2006	10	12	3.06115	2.43372
2006	10	13	3.03565	2.36718
2006	10	14	2.95953	2.0704
2006	10	15	2.59089	1.89906
2006	10	16	2.79535	2.31234
2006	10	17	2.39649	1.4479
2006	10	18	2.95697	2.69053
2006	10	19	3.08812	2.79183
2006	10	20	2.43615	1.63213
2006	10	21	2.80955	2.19557
2006	10	22	2.81676	2.07583
2006	10	23	3.06708	2.30914
2006	10	24	3.01963	2.36738
2006	10	25	2.85151	2.16965
2006	10	26	2.84853	2.09703
2006	10	27	2.50996	2.67266
2006	10	28	2.50504	2.63792
2006	10	29	2.28314	1.55673
2006	10	30	2.34047	1.35195
2006	10	31	2.5029	1.88982
2007	4	1	3.10698	2.67629
2007	4	2	2.8467	2.34337
2007	4	3	3.24377	3.13778
2007	4	4	3.26603	3.18716
2007	4	5	2.6834	2.36937
2007	4	6	3.28603	2.76001
2007	4	7	3.7733	3.22839
2007	4	8	3.9145	3.54639
2007	4	9	3.71652	3.42316
2007	4	10	3.55082	3.09639
2007	4	11	3.80204	3.44586
2007	4	12	3.34531	2.79605
2007	4	13	3.85629	3.47624
2007	4	14	3.72942	3.33368
2007	4	15	2.37571	1.88839
2007	4	16	2.99666	2.89014
2007	4	17	2.41326	2.1315
2007	4	18	3.35512	3.3883
2007	4	19	3.55052	3.8519
2007	4	20	3.45385	3.35241
2007	4	21	3.71117	3.42849
2007	4	22	3.99268	3.68291
2007	4	23	4.17778	4.03422
2007	4	24	3.94706	5.00589
2007	4	25	3.86054	3.62528
2007	4	26	3.39546	3.23934
2007	4	27	4.41789	4.63314
2007	4	28	4.21179	3.6025
2007	4	29	3.37954	2.74517
2007	4	30	3.93258	3.70345
2007	5	1	4.23053	3.62779
2007	5	2	4.43012	3.78939
2007	5	3	4.93882	4.49223
2007	5	4	5.04393	4.88894
2007	5	5	4.90025	4.32567
2007	5	6	5.32573	4.93332
2007	5	7	5.22477	5.40366
2007	5	8	4.91768	4.27562
2007	5	9	3.69824	2.62954
2007	5	10	3.50086	2.35344
2007	5	11	3.05586	1.51823
2007	5	12	3.19469	2.14777
2007	5	13	3.88502	2.94602
2007	5	14	4.45169	3.76519
2007	5	15	4.89734	4.2576
2007	5	16	4.64115	4.16407
2007	5	17	3.55479	2.3731
2007	5	18	3.30277	1.96422
2007	5	19	5.00275	4.38134
2007	5	20	5.15228	5.25933
2007	5	21	4.42016	3.81657
2007	5	22	4.86344	4.30204
2007	5	23	4.6965	4.22705
2007	5	24	5.04473	4.53353
2007	5	25	5.33715	4.83317
2007	5	26	4.71837	4.1658
2007	5	27	4.86723	4.35265
2007	5	28	4.76246	4.35049
2007	5	29	4.46431	3.69744
2007	5	30	5.28353	4.97604
2007	5	31	4.72401	4.2422
2007	6	1	4.86263	4.31502
2007	6	2	4.57621	3.76198
2007	6	3	4.95248	4.34815
2007	6	4	4.57926	3.77687
2007	6	5	5.12469	4.49834
2007	6	6	5.05389	4.34861
2007	6	7	5.55725	5.4638
2007	6	8	4.75085	4.1224
2007	6	9	4.01585	2.81097
2007	6	10	4.65435	3.65501
2007	6	11	4.64682	4.10636
[truncated: 2,711 more rows]

## Sheet: ETo(-u,-Rs) & Statistics
Year	Month	Day	ETo	ETo-missing(-u-Rs) RsT	ETo-full data
#	#	#	mm/day	mm/day	mm/day
1998	4	1	2.74032	3.36655	2.74032
1998	4	2	2.12095	2.91291	2.12095
1998	4	3	2.7115	2.76866	2.7115
1998	4	4	3.40971	3.5252	3.40971			RMSE, mm/day	MBE, mm/day	MAE, mm/day	RE	d
1998	4	5	2.97971	3.82461	2.97971			0.72397	-0.152612	0.557856	0.170971	0.876769
1998	4	6	3.09217	3.61634	3.09217
1998	4	7	3.00852	3.95793	3.00852
1998	4	8	3.08144	3.81699	3.08144
1998	4	9	3.24399	4.06831	3.24399
1998	4	10	3.19565	4.7527	3.19565
1998	4	11	3.6759	4.84472	3.6759
1998	4	12	4.0979	4.75926	4.0979
1998	4	13	3.99706	5.01871	3.99706
1998	4	14	3.31898	4.99102	3.31898
1998	4	15	2.1991	4.0124	2.1991
1998	4	16	3.91926	4.98825	3.91926
1998	4	17	1.72878	2.54876	1.72878
1998	4	18	3.51869	3.84187	3.51869
1998	4	19	3.01571	3.09371	3.01571
1998	4	20	3.17907	3.05163	3.17907
1998	4	21	3.42363	3.17736	3.42363
1998	4	22	2.86054	3.36181	2.86054
1998	4	23	3.23816	3.54705	3.23816
1998	4	24	3.36769	3.85274	3.36769
1998	4	25	2.52586	3.78794	2.52586
1998	4	26	1.57045	2.26885	1.57045
1998	4	27	1.81772	2.22091	1.81772
1998	4	28	2.72374	2.76134	2.72374
1998	4	29	2.79605	3.23124	2.79605
1998	4	30	3.08039	3.47061	3.08039
1998	5	1	3.62705	4.18703	3.62705
1998	5	2	3.60159	4.98637	3.60159
1998	5	3	3.29516	5.01324	3.29516
1998	5	4	4.28883	5.20083	4.28883
1998	5	5	4.21028	5.04614	4.21028
1998	5	6	3.30881	5.27046	3.30881
1998	5	7	2.38763	4.49149	2.38763
1998	5	8	3.70605	5.07184	3.70605
1998	5	9	3.57096	5.33893	3.57096
1998	5	10	2.84752	3.91836	2.84752
1998	5	11	3.23132	2.89779	3.23132
1998	5	12	3.54937	3.71438	3.54937
1998	5	13	3.00557	3.15334	3.00557
1998	5	14	2.63219	2.95764	2.63219
1998	5	15	3.30085	3.38772	3.30085
1998	5	16	3.70953	3.93213	3.70953
1998	5	17	2.63077	4.35422	2.63077
1998	5	18	1.96566	3.74183	1.96566
1998	5	19	3.31648	3.55725	3.31648
1998	5	20	2.70039	3.09252	2.70039
1998	5	21	3.67976	3.7707	3.67976
1998	5	22	2.83079	3.08417	2.83079
1998	5	23	2.88726	3.30235	2.88726
1998	5	24	3.94708	4.40158	3.94708
1998	5	25	4.18654	4.72201	4.18654
1998	5	26	3.88993	5.33304	3.88993
1998	5	27	3.80194	5.5808	3.80194
1998	5	28	4.03916	4.74145	4.03916
1998	5	29	4.30259	3.36812	4.30259
1998	5	30	3.87223	3.61567	3.87223
1998	5	31	2.85622	3.41726	2.85622
1998	6	1	4.05917	3.85616	4.05917
1998	6	2	3.77364	3.914	3.77364
1998	6	3	3.66492	4.25013	3.66492
1998	6	4	4.34613	4.75109	4.34613
1998	6	5	4.68956	5.51028	4.68956
1998	6	6	4.37128	4.72772	4.37128
1998	6	7	4.092	4.42002	4.092
1998	6	8	4.16576	4.49554	4.16576
1998	6	9	3.65447	4.07516	3.65447
1998	6	10	4.13359	4.23164	4.13359
1998	6	11	4.3687	4.4201	4.3687
1998	6	12	3.19814	4.21339	3.19814
1998	6	13	4.70793	4.53585	4.70793
1998	6	14	4.75514	5.01391	4.75514
1998	6	15	4.75326	4.75426	4.75326
1998	6	16	4.35097	4.18373	4.35097
1998	6	17	4.60282	5.43585	4.60282
1998	6	18	4.10278	4.74801	4.10278
1998	6	19	4.57929	5.04537	4.57929
1998	6	20	3.17543	4.05746	3.17543
1998	6	21	3.95576	3.79943	3.95576
1998	6	22	4.37528	3.99459	4.37528
1998	6	23	4.71393	4.36737	4.71393
1998	6	24	4.70857	5.23795	4.70857
1998	6	25	4.7761	5.09956	4.7761
1998	6	26	4.71793	4.89746	4.71793
1998	6	27	4.43791	4.64801	4.43791
1998	6	28	4.68043	5.5173	4.68043
1998	6	29	4.78025	5.43261	4.78025
1998	6	30	4.9225	5.31697	4.9225
1998	7	1	4.88838	4.7718	4.88838
1998	7	2	4.83581	4.84721	4.83581
1998	7	3	5.23286	5.74681	5.23286
1998	7	4	5.03514	5.15121	5.03514
1998	7	5	4.16164	3.28675	4.16164
1998	7	6	3.27821	3.90366	3.27821
1998	7	7	4.07609	4.21515	4.07609
1998	7	8	4.27676	4.34399	4.27676
1998	7	9	4.24753	4.27826	4.24753
1998	7	10	4.78799	4.35341	4.78799
1998	7	11	4.79299	4.50481	4.79299
1998	7	12	4.86931	4.80033	4.86931
1998	7	13	4.86279	4.88214	4.86279
1998	7	14	4.86661	4.92101	4.86661
1998	7	15	4.76198	4.87215	4.76198
1998	7	16	4.20147	4.24668	4.20147
1998	7	17	4.16327	4.21452	4.16327
1998	7	18	4.29616	4.25739	4.29616
1998	7	19	4.65753	4.58336	4.65753
1998	7	20	4.52982	4.51789	4.52982
1998	7	21	4.41038	4.89087	4.41038
1998	7	22	4.56028	5.37404	4.56028
1998	7	23	4.59775	5.7408	4.59775
1998	7	24	3.43404	4.26139	3.43404
1998	7	25	2.8483	3.89858	2.8483
1998	7	26	3.681	3.80559	3.681
1998	7	27	3.84385	4.3834	3.84385
1998	7	28	4.50138	4.85438	4.50138
1998	7	29	4.44112	4.53254	4.44112
1998	7	30	4.18523	4.51574	4.18523
1998	7	31	3.90703	4.26264	3.90703
1998	8	1	3.98641	4.12876	3.98641
1998	8	2	4.24335	4.18191	4.24335
1998	8	3	4.21297	4.44943	4.21297
1998	8	4	4.08808	4.58037	4.08808
1998	8	5	4.29983	5.46838	4.29983
1998	8	6	4.21813	5.9479	4.21813
1998	8	7	4.10563	6.28903	4.10563
1998	8	8	4.14009	5.8148	4.14009
1998	8	9	4.09314	5.81848	4.09314
1998	8	10	4.37034	5.19935	4.37034
1998	8	11	4.1518	4.66556	4.1518
1998	8	12	4.25506	4.69152	4.25506
1998	8	13	4.23917	5.00565	4.23917
1998	8	14	4.14241	5.02125	4.14241
1998	8	15	3.98341	4.75193	3.98341
1998	8	16	4.28676	5.16831	4.28676
1998	8	17	3.8303	5.40421	3.8303
1998	8	18	4.04083	5.14983	4.04083
1998	8	19	4.03215	4.25408	4.03215
1998	8	20	4.14786	4.30413	4.14786
1998	8	21	4.12475	4.28356	4.12475
1998	8	22	3.98336	4.3047	3.98336
1998	8	23	3.89594	4.34314	3.89594
1998	8	24	3.87157	4.70795	3.87157
1998	8	25	3.61109	4.5418	3.61109
1998	8	26	3.40043	4.44657	3.40043
1998	8	27	3.49473	4.49642	3.49473
1998	8	28	3.40567	3.99083	3.40567
1998	8	29	3.38292	4.05895	3.38292
1998	8	30	3.25851	3.97954	3.25851
1998	8	31	3.18417	4.07098	3.18417
1998	9	1	3.32426	3.79015	3.32426
1998	9	2	3.53744	3.58576	3.53744
1998	9	3	3.20326	4.05939	3.20326
1998	9	4	2.94821	4.32082	2.94821
1998	9	5	3.12055	3.93347	3.12055
1998	9	6	3.2588	3.80943	3.2588
1998	9	7	3.08034	3.74307	3.08034
1998	9	8	3.02103	4.4832	3.02103
1998	9	9	3.08539	4.63987	3.08539
1998	9	10	3.12641	4.36116	3.12641
1998	9	11	3.17911	4.12583	3.17911
1998	9	12	2.9102	3.7036	2.9102
1998	9	13	2.58751	3.53896	2.58751
1998	9	14	3.07473	3.68826	3.07473
1998	9	15	2.72175	3.55109	2.72175
1998	9	16	2.96048	3.47145	2.96048
1998	9	17	2.96109	3.48675	2.96109
1998	9	18	3.00306	3.86608	3.00306
1998	9	19	2.65451	3.37317	2.65451
1998	9	20	2.8131	3.53499	2.8131
1998	9	21	2.69085	3.58011	2.69085
1998	9	22	2.44217	3.21745	2.44217
1998	9	23	2.09179	2.61889	2.09179
1998	9	24	2.54536	3.63203	2.54536
1998	9	25	2.67062	4.05875	2.67062
1998	9	26	2.52097	4.05832	2.52097
1998	9	27	2.51857	4.25543	2.51857
1998	9	28	2.57165	4.4679	2.57165
1998	9	29	2.65635	4.29768	2.65635
1998	9	30	2.83603	3.69002	2.83603
1998	10	1	3.21431	3.06015	3.21431
1998	10	2	2.14163	3.05248	2.14163
1998	10	3	2.08954	3.00797	2.08954
1998	10	4	2.22411	2.94416	2.22411
1998	10	5	2.25717	2.8691	2.25717
1998	10	6	2.16295	2.85801	2.16295
1998	10	7	2.10569	3.04643	2.10569
1998	10	8	3.36281	3.27225	3.36281
1998	10	9	4.92998	3.30131	4.92998
1998	10	10	2.25836	3.4925	2.25836
1998	10	11	1.86237	3.51952	1.86237
1998	10	12	2.4295	3.55922	2.4295
1998	10	13	3.43373	3.46564	3.43373
1998	10	14	2.91891	3.22538	2.91891
1998	10	15	2.38487	2.95072	2.38487
1998	10	16	2.11101	2.33987	2.11101
1998	10	17	2.70931	2.86791	2.70931
1998	10	18	2.32329	2.79918	2.32329
1998	10	19	1.80462	2.81072	1.80462
1998	10	20	1.82445	2.90136	1.82445
1998	10	21	1.91375	3.08475	1.91375
1998	10	22	1.77961	3.18777	1.77961
1998	10	23	1.92421	3.09621	1.92421
1998	10	24	1.61982	3.2675	1.61982
1998	10	25	1.94455	2.50748	1.94455
1998	10	26	1.64281	2.41253	1.64281
1998	10	27	1.52408	2.22185	1.52408
1998	10	28	0.998312	1.47266	0.998312
1998	10	29	2.27589	2.23373	2.27589
1998	10	30	1.62723	2.38146	1.62723
1998	10	31	1.61344	2.22464	1.61344
1999	4	1	2.74429	2.88985	2.74429
1999	4	2	2.93531	2.92815	2.93531
1999	4	3	2.05916	2.43261	2.05916
1999	4	4	2.82063	2.86408	2.82063
1999	4	5	2.54663	3.35301	2.54663
1999	4	6	3.00976	3.37887	3.00976
1999	4	7	1.44237	2.34112	1.44237
1999	4	8	3.13267	3.10328	3.13267
1999	4	9	3.08318	3.33275	3.08318
1999	4	10	2.7143	3.04747	2.7143
1999	4	11	2.97943	3.32211	2.97943
1999	4	12	1.29144	2.43417	1.29144
1999	4	13	3.21721	3.21723	3.21721
1999	4	14	3.00448	2.90637	3.00448
1999	4	15	3.61892	3.44258	3.61892
1999	4	16	3.81686	3.67954	3.81686
1999	4	17	3.35977	3.74033	3.35977
1999	4	18	3.19844	4.01433	3.19844
1999	4	19	3.60617	3.44701	3.60617
1999	4	20	2.79159	3.16554	2.79159
1999	4	21	2.84647	2.92487	2.84647
1999	4	22	4.09525	3.6943	4.09525
1999	4	23	3.8604	3.85906	3.8604
1999	4	24	3.41976	4.33992	3.41976
1999	4	25	4.23201	4.68168	4.23201
1999	4	26	4.17961	4.92754	4.17961
1999	4	27	4.36974	3.79964	4.36974
1999	4	28	3.98304	3.66869	3.98304
1999	4	29	3.47763	3.46473	3.47763
1999	4	30	4.14429	4.06647	4.14429
1999	5	1	4.06634	5.19487	4.06634
1999	5	2	4.37638	5.39037	4.37638
1999	5	3	4.57585	4.72447	4.57585
1999	5	4	4.63627	4.97073	4.63627
1999	5	5	4.54521	5.52092	4.54521
1999	5	6	4.72414	5.49555	4.72414
1999	5	7	3.61626	3.9806	3.61626
1999	5	8	4.57145	4.34584	4.57145
1999	5	9	3.85949	3.82217	3.85949
1999	5	10	4.39409	4.41602	4.39409
1999	5	11	4.45045	4.701	4.45045
1999	5	12	4.44969	5.44	4.44969
1999	5	13	4.33985	4.03216	4.33985
1999	5	14	3.88814	3.67488	3.88814
1999	5	15	4.15395	4.64316	4.15395
1999	5	16	4.54897	4.73805	4.54897
1999	5	17	4.40331	4.0339	4.40331
1999	5	18	4.22811	4.46877	4.22811
1999	5	19	4.71097	4.98467	4.71097
1999	5	20	6.94367	5.07906	6.94367
1999	5	21	4.46551	5.40401	4.46551
1999	5	22	4.44944	5.79232	4.44944
1999	5	23	4.8167	5.89989	4.8167
1999	5	24	5.13201	5.24543	5.13201
1999	5	25	5.10375	3.56644	5.10375
1999	5	26	2.57421	3.29825	2.57421
1999	5	27	4.58211	5.13799	4.58211
1999	5	28	4.7543	5.77782	4.7543
1999	5	29	4.52086	4.66307	4.52086
1999	5	30	4.62624	4.099	4.62624
1999	5	31	4.86613	4.50203	4.86613
1999	6	1	4.87181	4.8738	4.87181
1999	6	2	5.06725	5.13457	5.06725
1999	6	3	5.13605	4.98215	5.13605
1999	6	4	4.85821	4.78468	4.85821
1999	6	5	5.10476	4.20624	5.10476
1999	6	6	4.7682	4.49255	4.7682
1999	6	7	5.21998	4.72398	5.21998
1999	6	8	5.03481	4.58286	5.03481
1999	6	9	4.84037	4.54621	4.84037
1999	6	10	4.81498	4.63278	4.81498
1999	6	11	3.71829	4.04517	3.71829
1999	6	12	4.80763	4.67619	4.80763
1999	6	13	4.58811	4.75772	4.58811
1999	6	14	3.20425	3.83411	3.20425
1999	6	15	4.5665	4.68436	4.5665
1999	6	16	4.95011	4.95157	4.95011
1999	6	17	5.41882	5.27381	5.41882
1999	6	18	5.5327	4.8815	5.5327
1999	6	19	5.27686	4.75742	5.27686
1999	6	20	5.42484	4.57269	5.42484
1999	6	21	5.17223	4.80091	5.17223
1999	6	22	4.7595	4.19006	4.7595
1999	6	23	5.12882	3.9908	5.12882
1999	6	24	4.70103	4.33782	4.70103
1999	6	25	5.04808	4.36817	5.04808
1999	6	26	4.41492	4.44569	4.41492
1999	6	27	4.63808	4.75927	4.63808
1999	6	28	4.66811	5.02061	4.66811
1999	6	29	5.56526	4.76633	5.56526
1999	6	30	5.43392	5.12265	5.43392
1999	7	1	5.48408	4.26951	5.48408
1999	7	2	4.71909	4.15974	4.71909
1999	7	3	4.6185	4.18155	4.6185
1999	7	4	5.13198	4.19288	5.13198
1999	7	5	5.18473	4.46323	5.18473
1999	7	6	5.38275	4.41583	5.38275
1999	7	7	5.52007	4.76239	5.52007
1999	7	8	4.90379	4.40673	4.90379
1999	7	9	5.50193	4.44059	5.50193
1999	7	10	5.71504	4.6813	5.71504
1999	7	11	5.78041	4.56046	5.78041
1999	7	12	5.89731	4.85432	5.89731
1999	7	13	5.62847	4.85312	5.62847
1999	7	14	5.58003	4.76864	5.58003
1999	7	15	4.99788	4.54785	4.99788
1999	7	16	3.9637	4.40526	3.9637
1999	7	17	4.89905	5.11251	4.89905
1999	7	18	4.96996	4.43777	4.96996
1999	7	19	5.15062	4.5652	5.15062
1999	7	20	5.52974	4.6601	5.52974
1999	7	21	5.76884	5.02173	5.76884
1999	7	22	5.58686	5.8194	5.58686
1999	7	23	5.14532	4.66989	5.14532
1999	7	24	5.51501	4.5769	5.51501
1999	7	25	5.49964	4.75525	5.49964
1999	7	26	4.18713	4.19156	4.18713
1999	7	27	4.39678	4.14922	4.39678
1999	7	28	4.8573	3.9973	4.8573
1999	7	29	5.10895	4.21639	5.10895
1999	7	30	4.41928	4.27437	4.41928
1999	7	31	4.23597	4.47918	4.23597
1999	8	1	4.66775	4.05137	4.66775
1999	8	2	4.37055	4.0763	4.37055
1999	8	3	4.45862	3.74858	4.45862
1999	8	4	4.42042	3.98601	4.42042
1999	8	5	4.51388	3.8334	4.51388
1999	8	6	4.62172	4.0965	4.62172
1999	8	7	5.08391	4.66494	5.08391
1999	8	8	4.93861	4.4573	4.93861
1999	8	9	4.68245	4.09885	4.68245
1999	8	10	4.3802	4.25357	4.3802
1999	8	11	4.36222	4.59644	4.36222
1999	8	12	4.94573	4.36273	4.94573
1999	8	13	5.07655	4.55482	5.07655
1999	8	14	4.98144	4.54208	4.98144
1999	8	15	4.3247	4.12471	4.3247
1999	8	16	4.16255	4.13585	4.16255
1999	8	17	4.2336	4.39022	4.2336
1999	8	18	4.35994	4.77218	4.35994
1999	8	19	4.95661	5.51661	4.95661
1999	8	20	4.28404	4.44997	4.28404
1999	8	21	3.8248	4.37186	3.8248
1999	8	22	3.97582	4.15692	3.97582
1999	8	23	3.48823	3.97691	3.48823
1999	8	24	4.03244	4.31176	4.03244
1999	8	25	4.32928	4.2674	4.32928
1999	8	26	4.48733	4.80349	4.48733
1999	8	27	4.5282	4.96909	4.5282
1999	8	28	5.10568	4.79085	5.10568
1999	8	29	4.53118	5.071	4.53118
1999	8	30	4.36339	5.15757	4.36339
1999	8	31	4.66558	4.40863	4.66558
1999	9	1	4.19153	3.58492	4.19153
1999	9	2	3.95688	3.64151	3.95688
1999	9	3	4.40916	3.63767	4.40916
1999	9	4	3.83658	3.6248	3.83658
1999	9	5	3.96049	3.36021	3.96049
1999	9	6	3.65806	3.52262	3.65806
1999	9	7	3.61916	3.99382	3.61916
1999	9	8	3.93489	3.901	3.93489
1999	9	9	3.48499	3.65182	3.48499
1999	9	10	3.4373	3.5991	3.4373
1999	9	11	3.82892	3.45707	3.82892
1999	9	12	2.21081	2.95926	2.21081
1999	9	13	3.19168	3.33709	3.19168
1999	9	14	3.03059	3.1382	3.03059
1999	9	15	2.84909	3.22184	2.84909
1999	9	16	3.50099	3.74557	3.50099
1999	9	17	3.42056	4.06971	3.42056
1999	9	18	3.32453	4.18587	3.32453
1999	9	19	3.72573	3.61937	3.72573
1999	9	20	3.07226	3.11847	3.07226
1999	9	21	3.41931	3.70995	3.41931
1999	9	22	3.41287	4.13073	3.41287
1999	9	23	3.09536	4.42653	3.09536
1999	9	24	3.15393	4.43288	3.15393
1999	9	25	3.17268	3.80103	3.17268
1999	9	26	3.42187	4.32955	3.42187
1999	9	27	3.06821	4.60564	3.06821
1999	9	28	3.03709	4.77582	3.03709
1999	9	29	3.28872	4.8008	3.28872
1999	9	30	4.16677	4.8379	4.16677
1999	10	1	2.88109	3.46086	2.88109
1999	10	2	2.62288	2.44959	2.62288
1999	10	3	2.67829	2.50818	2.67829
1999	10	4	2.64881	2.6744	2.64881
1999	10	5	2.67231	2.80892	2.67231
1999	10	6	2.4658	2.6485	2.4658
1999	10	7	2.19778	2.50187	2.19778
1999	10	8	2.35027	2.4667	2.35027
1999	10	9	1.63327	2.0355	1.63327
1999	10	10	2.34846	2.594	2.34846
1999	10	11	1.92525	2.29378	1.92525
1999	10	12	3.23339	2.89935	3.23339
1999	10	13	2.40093	2.92889	2.40093
1999	10	14	2.09874	3.00812	2.09874
1999	10	15	2.25406	2.53672	2.25406
1999	10	16	2.328	2.5648	2.328
1999	10	17	2.21236	2.46494	2.21236
1999	10	18	2.23611	2.20381	2.23611
1999	10	19	2.16295	2.84386	2.16295
1999	10	20	2.22651	2.51264	2.22651
1999	10	21	2.16905	2.52284	2.16905
1999	10	22	2.23718	2.62483	2.23718
1999	10	23	1.45379	2.04727	1.45379
1999	10	24	2.27819	2.42719	2.27819
1999	10	25	1.56294	2.30577	1.56294
1999	10	26	2.05384	3.06687	2.05384
1999	10	27	1.71744	3.12045	1.71744
1999	10	28	2.09963	2.55216	2.09963
1999	10	29	2.30175	2.904	2.30175
1999	10	30	2.17241	2.96016	2.17241
1999	10	31	3.76474	2.77568	3.76474
2000	4	1	2.73968	4.17683	2.73968
2000	4	2	4.30299	4.49104	4.30299
2000	4	3	2.94107	3.06399	2.94107
2000	4	4	2.49095	2.99659	2.49095
2000	4	5	2.21264	3.35732	2.21264
2000	4	6	3.34009	3.71866	3.34009
2000	4	7	3.3978	2.92171	3.3978
2000	4	8	3.07515	2.97947	3.07515
2000	4	9	1.75199	2.21164	1.75199
2000	4	10	3.21447	3.28165	3.21447
2000	4	11	2.24428	3.05964	2.24428
2000	4	12	3.09944	3.72675	3.09944
2000	4	13	3.38433	3.5255	3.38433
2000	4	14	2.88831	2.74628	2.88831
2000	4	15	2.86629	2.90163	2.86629
2000	4	16	3.46448	4.10126	3.46448
2000	4	17	4.02944	4.80381	4.02944
2000	4	18	4.52404	4.01758	4.52404
2000	4	19	2.91399	3.01194	2.91399
2000	4	20	1.28895	2.00063	1.28895
2000	4	21	2.1727	2.53278	2.1727
2000	4	22	1.72482	2.01612	1.72482
2000	4	23	2.4681	2.61375	2.4681
2000	4	24	2.27408	2.48166	2.27408
2000	4	25	2.99893	3.03081	2.99893
2000	4	26	3.73798	3.37296	3.73798
2000	4	27	4.10551	4.35883	4.10551
2000	4	28	1.38814	2.54973	1.38814
2000	4	29	2.19522	2.77171	2.19522
2000	4	30	2.84599	3.14076	2.84599
2000	5	1	4.07173	4.13083	4.07173
2000	5	2	3.51992	4.32563	3.51992
2000	5	3	3.56468	4.27824	3.56468
2000	5	4	3.70653	4.26465	3.70653
2000	5	5	2.04949	2.7949	2.04949
2000	5	6	2.13104	2.7625	2.13104
2000	5	7	3.43816	3.39317	3.43816
2000	5	8	4.17686	4.25044	4.17686
2000	5	9	4.38754	4.21427	4.38754
2000	5	10	4.37948	4.93325	4.37948
2000	5	11	4.36966	5.11261	4.36966
2000	5	12	4.37159	5.28979	4.37159
2000	5	13	4.59678	4.32987	4.59678
2000	5	14	4.41673	4.32017	4.41673
2000	5	15	3.73612	4.07796	3.73612
2000	5	16	3.63137	4.0531	3.63137
2000	5	17	2.44684	3.08884	2.44684
2000	5	18	4.39218	4.3988	4.39218
2000	5	19	4.17496	3.74538	4.17496
2000	5	20	3.62352	3.76263	3.62352
2000	5	21	4.13689	3.95143	4.13689
2000	5	22	4.41023	4.31718	4.41023
2000	5	23	3.41057	3.81421	3.41057
2000	5	24	3.38072	3.52872	3.38072
2000	5	25	4.22418	4.11293	4.22418
2000	5	26	4.11745	4.36518	4.11745
2000	5	27	4.70512	4.92727	4.70512
2000	5	28	4.93343	5.05367	4.93343
2000	5	29	4.94506	4.47931	4.94506
2000	5	30	3.86764	4.05452	3.86764
2000	5	31	4.79328	4.72255	4.79328
2000	6	1	5.16976	5.54449	5.16976
2000	6	2	5.13763	4.97431	5.13763
2000	6	3	4.75857	4.05381	4.75857
2000	6	4	4.37111	4.68268	4.37111
2000	6	5	4.83088	4.76956	4.83088
2000	6	6	5.04519	4.47157	5.04519
2000	6	7	4.11802	3.57527	4.11802
2000	6	8	4.87823	4.1509	4.87823
2000	6	9	5.68218	5.91898	5.68218
2000	6	10	2.39974	5.72677	2.39974
2000	6	11	5.38605	5.76685	5.38605
2000	6	12	5.15584	5.77664	5.15584
2000	6	13	6.49051	6.42348	6.49051
2000	6	14	8.00331	6.22033	8.00331
2000	6	15	6.46703	6.21398	6.46703
2000	6	16	5.00005	6.39583	5.00005
2000	6	17	4.96818	5.87883	4.96818
2000	6	18	5.08707	4.49745	5.08707
2000	6	19	5.7593	5.22311	5.7593
2000	6	20	6.02753	5.13058	6.02753
2000	6	21	4.98268	5.42593	4.98268
2000	6	22	5.19022	5.97058	5.19022
2000	6	23	5.23162	5.72036	5.23162
2000	6	24	5.14083	5.63204	5.14083
2000	6	25	5.49887	5.30673	5.49887
2000	6	26	5.35083	5.12332	5.35083
2000	6	27	5.19051	4.78719	5.19051
2000	6	28	4.77148	4.66024	4.77148
2000	6	29	5.47042	4.86364	5.47042
2000	6	30	5.19975	5.40815	5.19975
2000	7	1	5.21082	5.24161	5.21082
2000	7	2	5.20686	5.39934	5.20686
2000	7	3	5.62704	5.98043	5.62704
2000	7	4	5.4032	5.9851	5.4032
2000	7	5	5.42583	6.19213	5.42583
2000	7	6	5.21942	5.94617	5.21942
2000	7	7	5.35252	5.6714	5.35252
2000	7	8	5.37314	6.2177	5.37314
2000	7	9	5.44364	6.36977	5.44364
2000	7	10	5.21695	4.64561	5.21695
2000	7	11	5.18942	4.74491	5.18942
2000	7	12	5.49089	5.53556	5.49089
2000	7	13	5.49597	4.96465	5.49597
2000	7	14	4.41606	4.40709	4.41606
2000	7	15	4.99207	4.46271	4.99207
2000	7	16	5.11253	4.1548	5.11253
2000	7	17	4.56291	4.79973	4.56291
2000	7	18	4.4702	4.1856	4.4702
2000	7	19	4.91793	4.25235	4.91793
2000	7	20	4.85706	4.44438	4.85706
2000	7	21	4.99259	5.0001	4.99259
2000	7	22	5.05333	5.14515	5.05333
2000	7	23	4.77328	4.83806	4.77328
2000	7	24	5.05377	4.83301	5.05377
2000	7	25	5.14466	5.73716	5.14466
2000	7	26	5.17206	5.50011	5.17206
2000	7	27	5.12652	4.94211	5.12652
2000	7	28	5.31539	4.98798	5.31539
2000	7	29	4.73429	5.46628	4.73429
2000	7	30	4.96481	5.34908	4.96481
2000	7	31	5.19403	4.92198	5.19403
2000	8	1	4.96485	4.71256	4.96485
2000	8	2	5.40864	5.09177	5.40864
2000	8	3	5.34695	5.13689	5.34695
2000	8	4	5.92903	5.22476	5.92903
2000	8	5	4.5018	5.1901	4.5018
2000	8	6	4.6677	4.97646	4.6677
2000	8	7	4.72231	4.46927	4.72231
2000	8	8	4.67203	4.28728	4.67203
2000	8	9	4.57779	4.24508	4.57779
2000	8	10	4.06374	4.00479	4.06374
2000	8	11	4.03314	4.07981	4.03314
2000	8	12	3.56279	3.74997	3.56279
2000	8	13	3.82692	3.99802	3.82692
2000	8	14	4.4024	4.22062	4.4024
2000	8	15	4.5289	6.04221	4.5289
2000	8	16	4.49977	5.63165	4.49977
2000	8	17	4.6453	4.68792	4.6453
2000	8	18	4.51948	4.46349	4.51948
2000	8	19	4.08643	4.23925	4.08643
2000	8	20	4.26498	4.22602	4.26498
2000	8	21	4.31716	4.84124	4.31716
2000	8	22	4.238	5.23546	4.238
2000	8	23	4.15628	4.31472	4.15628
2000	8	24	3.4213	3.88273	3.4213
2000	8	25	4.14682	4.45169	4.14682
2000	8	26	3.4461	4.14502	3.4461
2000	8	27	3.53677	4.41264	3.53677
2000	8	28	4.23003	4.89556	4.23003
2000	8	29	4.03413	5.03287	4.03413
2000	8	30	3.99477	4.85461	3.99477
2000	8	31	4.42871	5.59403	4.42871
2000	9	1	4.08638	4.15065	4.08638
2000	9	2	4.16393	4.09128	4.16393
2000	9	3	3.58876	3.58412	3.58876
2000	9	4	4.02355	3.78613	4.02355
2000	9	5	4.16469	3.75169	4.16469
2000	9	6	3.55424	3.35973	3.55424
2000	9	7	4.34013	3.25766	4.34013
2000	9	8	3.89098	3.76969	3.89098
2000	9	9	3.87097	4.02305	3.87097
2000	9	10	4.0496	4.42775	4.0496
2000	9	11	3.83821	4.15001	3.83821
2000	9	12	3.99942	3.66808	3.99942
2000	9	13	3.64368	3.34784	3.64368
2000	9	14	3.38232	3.32558	3.38232
2000	9	15	3.46296	3.73831	3.46296
2000	9	16	3.42142	3.56384	3.42142
2000	9	17	3.26846	3.29958	3.26846
2000	9	18	3.60655	3.78825	3.60655
2000	9	19	3.79975	4.19988	3.79975
2000	9	20	3.8403	4.63799	3.8403
2000	9	21	3.61951	4.74739	3.61951
2000	9	22	5.11739	4.77207	5.11739
2000	9	23	3.79524	4.5904	3.79524
2000	9	24	3.50817	3.59144	3.50817
2000	9	25	3.34495	3.37933	3.34495
2000	9	26	3.06965	3.3857	3.06965
2000	9	27	3.2229	3.8567	3.2229
2000	9	28	2.20895	2.74155	2.20895
2000	9	29	2.03451	2.6874	2.03451
2000	9	30	3.21166	3.45132	3.21166
2000	10	1	2.58738	3.05061	2.58738
2000	10	2	2.94186	3.13981	2.94186
2000	10	3	2.55043	3.30913	2.55043
2000	10	4	3.23137	3.29097	3.23137
2000	10	5	3.31783	3.3611	3.31783
2000	10	6	2.77961	3.45457	2.77961
2000	10	7	2.79359	2.857	2.79359
2000	10	8	2.43763	2.31532	2.43763
2000	10	9	2.74717	2.58884	2.74717
2000	10	10	1.51194	1.71069	1.51194
2000	10	11	2.44175	2.12225	2.44175
2000	10	12	2.19843	2.59322	2.19843
2000	10	13	2.89319	2.93274	2.89319
2000	10	14	3.468	3.05955	3.468
2000	10	15	3.38268	2.93097	3.38268
2000	10	16	2.60365	2.93849	2.60365
2000	10	17	2.57686	2.71114	2.57686
2000	10	18	2.58936	2.327	2.58936
2000	10	19	2.29272	2.60901	2.29272
2000	10	20	0.930601	1.59392	0.930601
2000	10	21	2.29461	2.37816	2.29461
2000	10	22	1.89415	2.12636	1.89415
2000	10	23	1.85284	2.28777	1.85284
2000	10	24	1.30468	1.71657	1.30468
2000	10	25	1.59209	2.09202	1.59209
2000	10	26	1.87461	2.37833	1.87461
2000	10	27	2.07709	2.31255	2.07709
2000	10	28	1.95004	2.16652	1.95004
2000	10	29	1.05567	1.43787	1.05567
2000	10	30	2.26771	2.32996	2.26771
2000	10	31	2.33413	2.58003	2.33413
2001	4	1	4.46101	4.35756	4.46101
2001	4	2	1.6958	2.28063	1.6958
2001	4	3	3.47675	3.48504	3.47675
2001	4	4	3.2574	3.27144	3.2574
2001	4	5	2.95191	3.14432	2.95191
2001	4	6	2.78482	2.80074	2.78482
2001	4	7	2.96776	3.1994	2.96776
2001	4	8	3.8918	3.8522	3.8918
2001	4	9	3.31822	3.32755	3.31822
2001	4	10	2.83829	3.20803	2.83829
2001	4	11	3.2366	3.19863	3.2366
2001	4	12	3.96323	3.40692	3.96323
2001	4	13	3.36142	3.44897	3.36142
2001	4	14	1.96264	2.86249	1.96264
2001	4	15	3.45722	3.36973	3.45722
2001	4	16	3.14691	2.66201	3.14691
2001	4	17	3.50472	3.29934	3.50472
2001	4	18	3.70887	3.83512	3.70887
2001	4	19	3.89711	3.47356	3.89711
2001	4	20	3.9823	3.80511	3.9823
2001	4	21	3.36446	4.04716	3.36446
2001	4	22	3.50126	4.21378	3.50126
2001	4	23	4.5255	3.47819	4.5255
2001	4	24	4.33928	3.11201	4.33928
2001	4	25	4.33103	3.54917	4.33103
2001	4	26	3.83245	3.36229	3.83245
2001	4	27	4.22546	3.97612	4.22546
2001	4	28	4.86903	4.52991	4.86903
2001	4	29	5.56483	5.00193	5.56483
2001	4	30	5.60161	5.25049	5.60161
2001	5	1	4.43129	4.3174	4.43129
2001	5	2	6.144	4.85367	6.144
2001	5	3	3.82617	3.9588	3.82617
2001	5	4	4.49215	4.05679	4.49215
2001	5	5	4.54459	4.51626	4.54459
2001	5	6	3.04615	4.20557	3.04615
2001	5	7	3.91936	3.2477	3.91936
2001	5	8	2.24441	3.15075	2.24441
2001	5	9	2.06196	2.81849	2.06196
2001	5	10	2.01975	2.70601	2.01975
2001	5	11	1.9682	2.39984	1.9682
2001	5	12	4.03798	3.58897	4.03798
2001	5	13	3.91107	4.3103	3.91107
2001	5	14	4.24509	3.18292	4.24509
2001	5	15	3.14528	2.67135	3.14528
2001	5	16	3.73313	3.66906	3.73313
2001	5	17	4.82024	4.4989	4.82024
2001	5	18	5.15848	5.11938	5.15848
2001	5	19	5.24794	5.23459	5.24794
2001	5	20	4.73052	5.04413	4.73052
2001	5	21	5.42606	5.37515	5.42606
2001	5	22	5.04552	5.30317	5.04552
2001	5	23	5.10573	5.73128	5.10573
2001	5	24	5.99639	5.66984	5.99639
2001	5	25	6.67583	5.26557	6.67583
2001	5	26	4.96882	5.33357	4.96882
2001	5	27	5.16007	5.56676	5.16007
2001	5	28	5.07738	5.40205	5.07738
2001	5	29	5.66953	4.77862	5.66953
2001	5	30	5.25863	4.43636	5.25863
2001	5	31	5.30772	4.69265	5.30772
2001	6	1	5.59181	6.04073	5.59181
2001	6	2	5.64575	6.25935	5.64575
2001	6	3	5.76467	5.597	5.76467
2001	6	4	5.26427	4.59031	5.26427
2001	6	5	4.8275	4.07732	4.8275
2001	6	6	5.22663	3.81544	5.22663
2001	6	7	5.49244	5.04662	5.49244
2001	6	8	5.18366	4.40399	5.18366
2001	6	9	5.50466	5.08028	5.50466
2001	6	10	6.02251	5.8461	6.02251
2001	6	11	6.06561	6.44866	6.06561
2001	6	12	5.95407	6.52643	5.95407
2001	6	13	5.84806	6.42367	5.84806
2001	6	14	5.89648	6.27276	5.89648
2001	6	15	5.83636	4.9639	5.83636
2001	6	16	4.31944	3.9301	4.31944
2001	6	17	6.91959	5.32538	6.91959
2001	6	18	5.81187	4.9656	5.81187
2001	6	19	5.75463	4.71875	5.75463
2001	6	20	5.65404	4.73499	5.65404
2001	6	21	5.73459	4.93315	5.73459
2001	6	22	6.10709	4.45239	6.10709
2001	6	23	5.30728	4.64576	5.30728
2001	6	24	5.63866	4.51746	5.63866
2001	6	25	5.54935	4.5372	5.54935
2001	6	26	5.49453	4.18714	5.49453
2001	6	27	4.78015	4.52206	4.78015
2001	6	28	5.43555	4.58412	5.43555
2001	6	29	6.05242	5.51738	6.05242
2001	6	30	6.22867	5.9477	6.22867
2001	7	1	5.38833	4.58618	5.38833
2001	7	2	5.42159	3.99864	5.42159
2001	7	3	5.11683	4.15913	5.11683
2001	7	4	5.0974	4.2295	5.0974
2001	7	5	5.05726	4.32774	5.05726
2001	7	6	5.72079	4.28996	5.72079
2001	7	7	5.30945	4.276	5.30945
2001	7	8	5.89591	4.77254	5.89591
2001	7	9	6.36804	5.62044	6.36804
2001	7	10	5.88971	5.04597	5.88971
2001	7	11	5.73157	4.89834	5.73157
2001	7	12	5.65372	4.66933	5.65372
2001	7	13	4.95756	4.47012	4.95756
2001	7	14	5.02329	4.16127	5.02329
2001	7	15	4.55002	4.04304	4.55002
2001	7	16	4.48206	4.2538	4.48206
2001	7	17	5.25309	4.29402	5.25309
2001	7	18	5.3914	4.19661	5.3914
2001	7	19	5.07135	4.3513	5.07135
2001	7	20	5.65297	4.74354	5.65297
2001	7	21	5.81372	4.59938	5.81372
2001	7	22	5.38762	4.46672	5.38762
2001	7	23	5.64344	5.2564	5.64344
2001	7	24	5.39834	4.61958	5.39834
2001	7	25	5.21436	4.2484	5.21436
2001	7	26	5.02422	4.36862	5.02422
2001	7	27	5.0006	4.46981	5.0006
2001	7	28	3.94294	4.06961	3.94294
2001	7	29	4.24374	4.59356	4.24374
2001	7	30	4.3377	3.9615	4.3377
2001	7	31	4.11314	4.39797	4.11314
2001	8	1	5.20024	3.94797	5.20024
2001	8	2	4.91945	4.1499	4.91945
2001	8	3	5.12823	4.38272	5.12823
2001	8	4	4.43011	4.10106	4.43011
2001	8	5	5.07979	4.10772	5.07979
2001	8	6	4.70145	4.18704	4.70145
2001	8	7	5.12883	4.33409	5.12883
2001	8	8	4.80051	4.32618	4.80051
2001	8	9	4.89024	4.24683	4.89024
2001	8	10	5.32482	5.09633	5.32482
2001	8	11	5.19406	4.44666	5.19406
2001	8	12	4.55816	4.16769	4.55816
2001	8	13	4.56617	4.16868	4.56617
2001	8	14	5.03396	4.40516	5.03396
2001	8	15	5.12698	4.49072	5.12698
2001	8	16	4.83303	4.39067	4.83303
2001	8	17	5.05542	4.13598	5.05542
2001	8	18	4.36459	4.94282	4.36459
2001	8	19	4.06163	4.48763	4.06163
2001	8	20	4.8656	4.54852	4.8656
2001	8	21	4.94314	4.33054	4.94314
2001	8	22	5.12019	4.82332	5.12019
2001	8	23	5.03992	4.43734	5.03992
2001	8	24	5.15174	4.35947	5.15174
2001	8	25	5.06307	4.56169	5.06307
2001	8	26	4.81599	4.24512	4.81599
2001	8	27	5.115	4.91007	5.115
2001	8	28	4.8241	4.39818	4.8241
2001	8	29	4.80778	4.40462	4.80778
2001	8	30	4.6959	4.11618	4.6959
2001	8	31	4.75357	4.31983	4.75357
2001	9	1	4.47903	4.0165	4.47903
2001	9	2	4.42924	4.23267	4.42924
2001	9	3	4.38848	3.72653	4.38848
2001	9	4	4.10853	3.56685	4.10853
2001	9	5	4.40874	3.70623	4.40874
2001	9	6	4.19897	3.48917	4.19897
2001	9	7	3.22627	3.29414	3.22627
2001	9	8	4.22871	3.33041	4.22871
2001	9	9	3.81327	3.33753	3.81327
2001	9	10	4.24178	3.60181	4.24178
2001	9	11	3.70131	3.58292	3.70131
2001	9	12	3.87476	3.54816	3.87476
2001	9	13	4.01048	3.48988	4.01048
2001	9	14	3.76844	3.40802	3.76844
2001	9	15	4.00941	3.30004	4.00941
2001	9	16	3.88635	3.68854	3.88635
2001	9	17	3.97942	3.75667	3.97942
2001	9	18	3.97065	3.88018	3.97065
2001	9	19	3.93323	3.81848	3.93323
2001	9	20	4.00407	3.95321	4.00407
2001	9	21	3.85015	4.04755	3.85015
2001	9	22	3.71384	4.18914	3.71384
2001	9	23	3.72106	4.20097	3.72106
2001	9	24	3.84246	4.00152	3.84246
2001	9	25	3.74329	3.84961	3.74329
2001	9	26	3.45832	3.64161	3.45832
2001	9	27	3.64527	3.47454	3.64527
2001	9	28	3.8273	3.25705	3.8273
2001	9	29	3.90785	3.66033	3.90785
2001	9	30	3.71615	3.74297	3.71615
2001	10	1	2.99028	3.16263	2.99028
2001	10	2	2.92933	3.17081	2.92933
2001	10	3	2.81854	3.48333	2.81854
2001	10	4	3.08717	3.37889	3.08717
2001	10	5	2.75694	2.65513	2.75694
2001	10	6	3.22805	2.80364	3.22805
2001	10	7	2.99889	2.71926	2.99889
2001	10	8	2.93042	3.44364	2.93042
2001	10	9	4.35388	3.55925	4.35388
2001	10	10	2.87194	2.8472	2.87194
2001	10	11	2.7577	2.90207	2.7577
2001	10	12	2.70728	3.06813	2.70728
2001	10	13	2.36746	3.6241	2.36746
2001	10	14	2.46397	2.67203	2.46397
2001	10	15	2.62431	2.53643	2.62431
2001	10	16	2.76616	2.62279	2.76616
2001	10	17	2.54656	2.80999	2.54656
2001	10	18	2.57795	2.938	2.57795
2001	10	19	2.95936	2.90774	2.95936
2001	10	20	2.39935	2.94372	2.39935
2001	10	21	2.59149	3.12738	2.59149
2001	10	22	2.46627	2.74778	2.46627
2001	10	23	2.67812	2.60462	2.67812
2001	10	24	2.64184	2.47946	2.64184
2001	10	25	3.03664	2.75383	3.03664
2001	10	26	3.63422	2.80736	3.63422
2001	10	27	2.85303	2.67393	2.85303
2001	10	28	1.53496	1.73963	1.53496
2001	10	29	1.81676	2.20383	1.81676
2001	10	30	1.99102	2.27699	1.99102
2001	10	31	1.96357	2.60165	1.96357
2002	4	1	1.53546	1.86922	1.53546
2002	4	2	1.98592	2.18342	1.98592
2002	4	3	3.288	3.33565	3.288
2002	4	4	1.67658	2.18035	1.67658
2002	4	5	3.33261	3.02511	3.33261
2002	4	6	1.92789	2.51865	1.92789
2002	4	7	3.30571	3.41193	3.30571
2002	4	8	2.93949	3.06913	2.93949
2002	4	9	3.31957	3.03103	3.31957
2002	4	10	3.69638	3.91272	3.69638
2002	4	11	3.96889	4.06993	3.96889
2002	4	12	3.63671	3.69884	3.63671
2002	4	13	1.81506	2.77906	1.81506
2002	4	14	3.4274	3.41983	3.4274
2002	4	15	2.47895	3.37798	2.47895
2002	4	16	1.95728	2.80367	1.95728
2002	4	17	3.62063	3.07836	3.62063
2002	4	18	2.94741	2.66431	2.94741
2002	4	19	1.79813	2.25327	1.79813
2002	4	20	2.76972	2.64464	2.76972
2002	4	21	3.18008	3.19761	3.18008
2002	4	22	2.13044	2.62986	2.13044
2002	4	23	2.70571	2.64279	2.70571
2002	4	24	2.17836	2.39489	2.17836
2002	4	25	3.3889	3.11868	3.3889
2002	4	26	3.34027	3.04365	3.34027
2002	4	27	3.44821	3.4889	3.44821
2002	4	28	3.954	3.48132	3.954
2002	4	29	3.4884	3.2989	3.4884
2002	4	30	3.95451	3.57514	3.95451
2002	5	1	4.23509	4.30021	4.23509
2002	5	2	2.3895	3.39996	2.3895
2002	5	3	3.69969	3.87255	3.69969
2002	5	4	3.88989	3.89044	3.88989
2002	5	5	3.72093	3.83753	3.72093
2002	5	6	4.81647	4.57436	4.81647
2002	5	7	4.26487	4.81139	4.26487
2002	5	8	4.14161	4.57306	4.14161
2002	5	9	4.8285	4.86071	4.8285
2002	5	10	4.58899	4.71175	4.58899
2002	5	11	4.49398	5.03116	4.49398
2002	5	12	3.81513	4.12664	3.81513
2002	5	13	3.89265	4.06121	3.89265
2002	5	14	2.45442	3.13102	2.45442
2002	5	15	2.87881	3.77015	2.87881
2002	5	16	4.40795	4.64427	4.40795
2002	5	17	4.31658	4.91499	4.31658
2002	5	18	2.4038	3.1564	2.4038
2002	5	19	4.00557	4.20419	4.00557
2002	5	20	4.48821	4.03087	4.48821
2002	5	21	4.22899	4.14269	4.22899
2002	5	22	4.51183	3.93587	4.51183
2002	5	23	3.27202	3.69895	3.27202
2002	5	24	4.61788	4.20793	4.61788
2002	5	25	4.85464	4.47402	4.85464
2002	5	26	5.32793	5.79356	5.32793
2002	5	27	4.49287	4.46676	4.49287
2002	5	28	4.39414	3.83615	4.39414
2002	5	29	4.02274	4.12063	4.02274
2002	5	30	4.58925	4.27093	4.58925
2002	5	31	4.53689	4.09353	4.53689
2002	6	1	3.18313	3.98985	3.18313
2002	6	2	4.6623	4.74411	4.6623
2002	6	3	5.20299	5.27485	5.20299
2002	6	4	4.55623	5.17659	4.55623
2002	6	5	3.67692	4.45995	3.67692
2002	6	6	4.93375	4.72047	4.93375
2002	6	7	5.37389	5.6721	5.37389
2002	6	8	4.9303	6.63881	4.9303
2002	6	9	5.49133	6.76569	5.49133
2002	6	10	5.52072	6.67481	5.52072
2002	6	11	5.47261	4.2821	5.47261
2002	6	12	4.74747	4.21895	4.74747
2002	6	13	5.02829	4.86582	5.02829
2002	6	14	5.44521	5.37147	5.44521
2002	6	15	5.3582	4.93175	5.3582
2002	6	16	4.74165	4.49327	4.74165
2002	6	17	4.54077	3.92721	4.54077
2002	6	18	5.13659	4.31759	5.13659
2002	6	19	6.75725	5.22506	6.75725
2002	6	20	6.19138	5.28829	6.19138
2002	6	21	7.51953	5.46214	7.51953
2002	6	22	5.38212	5.32623	5.38212
2002	6	23	5.39072	4.77334	5.39072
2002	6	24	5.22538	4.75901	5.22538
2002	6	25	5.10903	4.28181	5.10903
2002	6	26	3.8961	4.1751	3.8961
2002	6	27	5.03295	4.69218	5.03295
2002	6	28	4.65925	4.28161	4.65925
2002	6	29	5.35527	4.49172	5.35527
2002	6	30	5.68488	4.88624	5.68488
2002	7	1	5.04168	4.72517	5.04168
2002	7	2	4.6613	4.89035	4.6613
2002	7	3	4.84904	4.6372	4.84904
2002	7	4	5.55604	4.8739	5.55604
2002	7	5	5.72507	4.71595	5.72507
2002	7	6	5.62484	5.04164	5.62484
2002	7	7	5.6402	4.80633	5.6402
2002	7	8	4.99157	4.43747	4.99157
2002	7	9	4.70982	4.07378	4.70982
2002	7	10	5.1667	4.45934	5.1667
2002	7	11	4.52065	4.26908	4.52065
2002	7	12	4.58957	4.12908	4.58957
2002	7	13	4.25163	4.22178	4.25163
2002	7	14	4.31455	4.5221	4.31455
2002	7	15	5.35668	4.99283	5.35668
2002	7	16	5.61327	5.13302	5.61327
2002	7	17	5.8019	5.1767	5.8019
2002	7	18	5.72462	4.98004	5.72462
2002	7	19	5.43484	4.79672	5.43484
2002	7	20	5.55924	5.01284	5.55924
2002	7	21	5.23125	4.8331	5.23125
2002	7	22	4.95703	4.54229	4.95703
2002	7	23	5.03883	4.30804	5.03883
2002	7	24	6.65979	5.65677	6.65979
2002	7	25	5.95942	5.28563	5.95942
2002	7	26	5.329	4.78037	5.329
2002	7	27	5.09231	4.87951	5.09231
2002	7	28	5.45092	4.78226	5.45092
2002	7	29	5.57728	5.75288	5.57728
2002	7	30	5.59705	6.05694	5.59705
2002	7	31	5.59529	5.98652	5.59529
2002	8	1	5.33185	4.88049	5.33185
2002	8	2	5.60477	4.3442	5.60477
2002	8	3	4.50297	4.23737	4.50297
2002	8	4	4.54122	4.50843	4.54122
2002	8	5	4.76047	4.33253	4.76047
2002	8	6	4.9582	4.49803	4.9582
2002	8	7	5.18527	4.65389	5.18527
2002	8	8	4.81974	3.83908	4.81974
2002	8	9	4.60315	4.12774	4.60315
2002	8	10	4.96406	4.69245	4.96406
2002	8	11	5.34546	4.56764	5.34546
2002	8	12	5.66269	5.54831	5.66269
2002	8	13	5.40699	4.88471	5.40699
2002	8	14	4.928	4.04451	4.928
2002	8	15	4.67316	4.07836	4.67316
2002	8	16	4.17677	4.3878	4.17677
2002	8	17	4.17924	4.30427	4.17924
2002	8	18	3.31666	4.08447	3.31666
2002	8	19	4.37036	4.03928	4.37036
2002	8	20	4.5184	4.16219	4.5184
2002	8	21	4.25968	4.13223	4.25968
2002	8	22	4.55493	4.22779	4.55493
2002	8	23	4.91813	4.4954	4.91813
2002	8	24	4.97452	4.7351	4.97452
2002	8	25	4.92916	4.60705	4.92916
2002	8	26	5.00399	4.80991	5.00399
2002	8	27	4.93154	5.13259	4.93154
2002	8	28	4.71022	5.06276	4.71022
2002	8	29	4.86456	4.54787	4.86456
2002	8	30	4.56524	4.45627	4.56524
2002	8	31	4.14941	4.2708	4.14941
2002	9	1	3.97581	3.56035	3.97581
2002	9	2	4.18005	3.61966	4.18005
2002	9	3	4.14112	3.56707	4.14112
2002	9	4	4.04602	3.42797	4.04602
2002	9	5	3.54231	3.40937	3.54231
2002	9	6	3.8464	3.36927	3.8464
2002	9	7	3.40561	3.45068	3.40561
2002	9	8	3.67758	3.79207	3.67758
2002	9	9	4.03185	3.84151	4.03185
2002	9	10	3.31849	3.45745	3.31849
2002	9	11	3.59597	3.82498	3.59597
2002	9	12	3.23729	3.54982	3.23729
2002	9	13	3.75802	3.68777	3.75802
2002	9	14	3.62782	3.5901	3.62782
2002	9	15	3.68398	3.66591	3.68398
2002	9	16	3.67305	3.81431	3.67305
2002	9	17	3.78813	3.86537	3.78813
2002	9	18	3.87318	3.33766	3.87318
2002	9	19	4.32194	3.89953	4.32194
2002	9	20	3.62614	4.1196	3.62614
2002	9	21	3.9602	4.58445	3.9602
2002	9	22	4.15627	4.76391	4.15627
2002	9	23	3.49633	3.61198	3.49633
2002	9	24	3.15119	3.52438	3.15119
2002	9	25	3.41097	3.71535	3.41097
2002	9	26	3.28084	3.53021	3.28084
2002	9	27	3.14065	3.37247	3.14065
2002	9	28	3.43173	3.45371	3.43173
2002	9	29	3.39985	4.07885	3.39985
2002	9	30	3.31849	4.57271	3.31849
2002	10	1	2.78046	3.55222	2.78046
2002	10	2	1.98066	2.18065	1.98066
2002	10	3	3.08205	2.94762	3.08205
2002	10	4	2.66046	3.00347	2.66046
2002	10	5	2.65277	2.79483	2.65277
2002	10	6	2.7363	3.13514	2.7363
2002	10	7	1.96004	2.55907	1.96004
2002	10	8	2.55881	2.77862	2.55881
2002	10	9	2.55378	2.77489	2.55378
2002	10	10	2.65602	3.21036	2.65602
2002	10	11	2.66633	3.48391	2.66633
2002	10	12	2.65359	3.52968	2.65359
2002	10	13	2.7336	3.53611	2.7336
2002	10	14	1.8316	2.73801	1.8316
2002	10	15	2.66097	2.57081	2.66097
2002	10	16	1.96396	2.30873	1.96396
2002	10	17	2.13427	3.17782	2.13427
2002	10	18	2.52691	3.28317	2.52691
2002	10	19	2.46584	3.15924	2.46584
2002	10	20	2.25592	2.51367	2.25592
2002	10	21	3.81198	2.73361	3.81198
2002	10	22	2.62094	2.84859	2.62094
2002	10	23	2.24123	2.93736	2.24123
2002	10	24	2.21084	3.20481	2.21084
2002	10	25	2.08859	3.11172	2.08859
2002	10	26	2.1744	2.95862	2.1744
2002	10	27	2.27737	2.79698	2.27737
2002	10	28	2.1909	2.88045	2.1909
2002	10	29	2.22505	2.63919	2.22505
2002	10	30	3.73411	2.75969	3.73411
2002	10	31	2.22904	2.93706	2.22904
2003	4	1	2.99259	3.5739	2.99259
2003	4	2	2.35287	2.57124	2.35287
2003	4	3	3.16313	3.16962	3.16313
2003	4	4	3.73815	4.355	3.73815
2003	4	5	3.78239	4.57706	3.78239
2003	4	6	3.84597	2.69499	3.84597
2003	4	7	3.00331	2.95167	3.00331
2003	4	8	3.72032	4.03152	3.72032
2003	4	9	3.42812	3.24382	3.42812
2003	4	10	3.31858	3.43932	3.31858
2003	4	11	3.83932	4.1988	3.83932
2003	4	12	3.83067	4.36898	3.83067
2003	4	13	3.68871	3.63234	3.68871
2003	4	14	2.08426	2.72946	2.08426
2003	4	15	1.44931	1.96498	1.44931
2003	4	16	3.32203	2.99525	3.32203
2003	4	17	2.0137	2.62453	2.0137
2003	4	18	1.63594	2.28952	1.63594
2003	4	19	3.42779	2.85316	3.42779
2003	4	20	2.31818	2.57202	2.31818
2003	4	21	2.62057	2.59227	2.62057
2003	4	22	3.13678	3.16972	3.13678
2003	4	23	2.01448	2.90412	2.01448
2003	4	24	3.51757	3.68226	3.51757
2003	4	25	1.01636	2.30773	1.01636
2003	4	26	2.18971	2.61608	2.18971
2003	4	27	4.19685	3.62583	4.19685
2003	4	28	3.8482	3.59573	3.8482
2003	4	29	2.90478	3.14649	2.90478
2003	4	30	3.78062	4.12358	3.78062
2003	5	1	4.68524	5.25844	4.68524
2003	5	2	5.67676	5.54523	5.67676
2003	5	3	5.16127	5.90846	5.16127
2003	5	4	5.39597	5.90299	5.39597
2003	5	5	5.30736	5.8016	5.30736
2003	5	6	5.34394	5.75095	5.34394
2003	5	7	6.93122	5.16192	6.93122
2003	5	8	6.50763	5.32586	6.50763
2003	5	9	6.17696	5.66803	6.17696
2003	5	10	5.87816	6.02637	5.87816
2003	5	11	5.77667	6.18966	5.77667
2003	5	12	5.30852	6.10984	5.30852
2003	5	13	5.21726	6.25998	5.21726
2003	5	14	5.46076	5.43033	5.46076
2003	5	15	4.21416	4.49063	4.21416
2003	5	16	4.72843	4.65816	4.72843
2003	5	17	4.55348	5.78717	4.55348
2003	5	18	5.21905	5.47046	5.21905
2003	5	19	5.28778	5.11188	5.28778
2003	5	20	5.15958	5.06487	5.15958
2003	5	21	4.67023	4.49853	4.67023
2003	5	22	4.72355	3.97286	4.72355
2003	5	23	5.03451	4.00131	5.03451
2003	5	24	4.94353	5.17189	4.94353
2003	5	25	5.46132	3.96808	5.46132
2003	5	26	4.86623	4.07484	4.86623
2003	5	27	4.89367	4.36259	4.89367
2003	5	28	3.98446	4.13001	3.98446
2003	5	29	3.18624	3.8084	3.18624
2003	5	30	2.95091	3.34134	2.95091
2003	5	31	2.36862	3.0815	2.36862
2003	6	1	4.49216	4.33916	4.49216
2003	6	2	3.88288	3.8498	3.88288
2003	6	3	4.43513	4.49437	4.43513
2003	6	4	4.87725	4.91842	4.87725
2003	6	5	6.17669	5.8754	6.17669
2003	6	6	6.02311	5.90296	6.02311
2003	6	7	5.67673	6.3229	5.67673
2003	6	8	3.16381	4.25465	3.16381
2003	6	9	4.3511	4.07707	4.3511
2003	6	10	4.06771	4.37912	4.06771
2003	6	11	4.54371	3.96278	4.54371
2003	6	12	4.1812	4.61072	4.1812
2003	6	13	5.24422	5.34107	5.24422
2003	6	14	5.59882	5.13711	5.59882
2003	6	15	5.63862	4.84181	5.63862
2003	6	16	5.47385	4.83588	5.47385
2003	6	17	4.68541	4.43577	4.68541
2003	6	18	5.54025	5.07634	5.54025
2003	6	19	5.59297	4.71997	5.59297
2003	6	20	5.18259	4.14581	5.18259
2003	6	21	4.5104	3.91498	4.5104
2003	6	22	4.45969	3.93164	4.45969
2003	6	23	5.42122	5.04018	5.42122
2003	6	24	5.76902	5.32533	5.76902
2003	6	25	6.11068	6.16345	6.11068
2003	6	26	5.6294	5.54817	5.6294
2003	6	27	5.07363	4.87743	5.07363
2003	6	28	4.68692	4.72605	4.68692
2003	6	29	5.29741	4.70967	5.29741
2003	6	30	5.70774	4.66422	5.70774
2003	7	1	5.91088	4.76752	5.91088
2003	7	2	5.55066	4.93683	5.55066
2003	7	3	5.72415	5.40196	5.72415
2003	7	4	5.76501	4.84768	5.76501
2003	7	5	5.92507	5.84918	5.92507
2003	7	6	4.01945	4.02168	4.01945
2003	7	7	4.77281	4.5482	4.77281
2003	7	8	5.34512	4.59533	5.34512
2003	7	9	4.69514	4.22686	4.69514
2003	7	10	5.20797	4.73418	5.20797
2003	7	11	5.51269	4.79724	5.51269
2003	7	12	5.56036	4.33147	5.56036
2003	7	13	5.25678	4.26394	5.25678
2003	7	14	4.88398	4.0092	4.88398
2003	7	15	4.94282	4.30713	4.94282
2003	7	16	5.31529	4.2818	5.31529
2003	7	17	5.25279	4.32251	5.25279
2003	7	18	5.44032	4.73383	5.44032
2003	7	19	5.80401	4.98049	5.80401
2003	7	20	5.57669	5.21064	5.57669
2003	7	21	5.27952	4.71098	5.27952
2003	7	22	5.34253	4.95397	5.34253
2003	7	23	5.48498	4.99917	5.48498
2003	7	24	5.1952	5.30416	5.1952
2003	7	25	5.05565	4.85365	5.05565
2003	7	26	5.22715	4.91685	5.22715
2003	7	27	5.00425	4.81215	5.00425
2003	7	28	5.05534	4.58864	5.05534
2003	7	29	4.92682	4.97618	4.92682
2003	7	30	5.08994	4.65558	5.08994
2003	7	31	4.83894	4.47567	4.83894
2003	8	1	4.98453	4.29754	4.98453
2003	8	2	4.93868	4.63137	4.93868
2003	8	3	4.88334	4.28869	4.88334
2003	8	4	4.57773	4.1301	4.57773
2003	8	5	4.03817	4.25993	4.03817
2003	8	6	4.49031	4.51945	4.49031
2003	8	7	4.77938	5.05038	4.77938
2003	8	8	3.82767	3.99559	3.82767
2003	8	9	4.48239	4.21316	4.48239
2003	8	10	4.60971	4.36337	4.60971
2003	8	11	4.88063	3.71965	4.88063
2003	8	12	4.38064	4.64701	4.38064
2003	8	13	4.68503	4.89805	4.68503
2003	8	14	4.66228	4.80655	4.66228
2003	8	15	4.31138	5.42145	4.31138
2003	8	16	4.29912	5.36051	4.29912
2003	8	17	4.81289	4.79345	4.81289
2003	8	18	4.66528	4.77921	4.66528
2003	8	19	4.30523	5.46346	4.30523
2003	8	20	4.74232	4.73258	4.74232
2003	8	21	4.34389	4.14271	4.34389
2003	8	22	4.53466	4.64809	4.53466
2003	8	23	4.62343	4.67578	4.62343
2003	8	24	4.53009	4.73117	4.53009
2003	8	25	4.05276	4.26295	4.05276
2003	8	26	4.29932	4.40969	4.29932
2003	8	27	3.79939	4.15126	3.79939
2003	8	28	3.96663	4.34744	3.96663
2003	8	29	4.16643	4.39847	4.16643
2003	8	30	4.4036	4.46719	4.4036
2003	8	31	4.53355	4.48735	4.53355
2003	9	1	4.19789	3.68911	4.19789
2003	9	2	3.78758	3.74432	3.78758
2003	9	3	3.76332	3.73293	3.76332
2003	9	4	3.41733	3.43358	3.41733
2003	9	5	3.21656	3.08048	3.21656
2003	9	6	4.15795	3.76878	4.15795
2003	9	7	4.40854	3.90135	4.40854
2003	9	8	3.71475	4.01789	3.71475
2003	9	9	3.57583	3.64393	3.57583
2003	9	10	3.33092	3.52842	3.33092
2003	9	11	2.92158	3.07115	2.92158
2003	9	12	3.48673	3.21324	3.48673
2003	9	13	3.37991	3.1468	3.37991
2003	9	14	3.3308	3.37829	3.3308
2003	9	15	3.01699	3.19188	3.01699
2003	9	16	3.12525	3.52424	3.12525
2003	9	17	2.81931	3.03364	2.81931
2003	9	18	4.25021	4.00515	4.25021
2003	9	19	3.6508	4.09374	3.6508
2003	9	20	3.94027	3.91265	3.94027
2003	9	21	5.25383	4.10082	5.25383
2003	9	22	4.60163	4.30486	4.60163
2003	9	23	4.43024	4.5865	4.43024
2003	9	24	3.34673	4.01082	3.34673
2003	9	25	3.02496	3.50446	3.02496
2003	9	26	3.22851	3.77866	3.22851
2003	9	27	3.10891	3.62085	3.10891
2003	9	28	2.81473	3.36187	2.81473
2003	9	29	3.10143	3.47304	3.10143
2003	9	30	3.22169	4.09743	3.22169
2003	10	1	2.09192	2.48135	2.09192
2003	10	2	2.34338	2.58943	2.34338
2003	10	3	2.50199	2.94163	2.50199
2003	10	4	2.72887	2.72253	2.72887
2003	10	5	2.67452	2.84244	2.67452
2003	10	6	2.56747	3.3433	2.56747
2003	10	7	2.636	3.24615	2.636
2003	10	8	2.35601	2.46706	2.35601
2003	10	9	2.14622	2.71998	2.14622
2003	10	10	2.44195	2.80215	2.44195
2003	10	11	2.66544	2.75584	2.66544
2003	10	12	2.32684	3.00316	2.32684
2003	10	13	2.20156	3.08647	2.20156
2003	10	14	2.17391	3.22668	2.17391
2003	10	15	2.51234	3.3297	2.51234
2003	10	16	2.47779	2.77937	2.47779
2003	10	17	2.25216	2.51819	2.25216
2003	10	18	2.12833	2.51605	2.12833
2003	10	19	2.16608	2.4806	2.16608
2003	10	20	1.81148	2.35909	1.81148
2003	10	21	2.07486	2.57049	2.07486
2003	10	22	2.14656	2.67879	2.14656
2003	10	23	2.21895	3.00039	2.21895
2003	10	24	1.39588	2.12794	1.39588
2003	10	25	2.11295	2.54691	2.11295
2003	10	26	1.98092	2.2634	1.98092
2003	10	27	2.83799	2.85543	2.83799
2003	10	28	2.05671	2.30191	2.05671
2003	10	29	2.87199	2.23779	2.87199
2003	10	30	1.9119	2.23685	1.9119
2003	10	31	0.901856	1.26828	0.901856
2004	4	1	2.9297	3.9991	2.9297
2004	4	2	3.37115	3.41241	3.37115
2004	4	3	4.43566	3.41967	4.43566
2004	4	4	4.83576	3.18115	4.83576
2004	4	5	3.60639	3.53943	3.60639
2004	4	6	2.5232	3.80124	2.5232
2004	4	7	3.19949	3.70061	3.19949
2004	4	8	3.03281	4.14706	3.03281
2004	4	9	3.00628	4.56099	3.00628
2004	4	10	3.90843	4.91436	3.90843
2004	4	11	3.96105	4.93994	3.96105
2004	4	12	3.94319	4.76233	3.94319
2004	4	13	3.58973	4.45701	3.58973
2004	4	14	3.15324	3.85162	3.15324
2004	4	15	3.65896	3.57938	3.65896
2004	4	16	4.16895	3.20155	4.16895
2004	4	17	3.51024	3.90124	3.51024
2004	4	18	1.62017	2.51978	1.62017
2004	4	19	3.67218	3.96329	3.67218
2004	4	20	2.99138	3.14718	2.99138
2004	4	21	1.3051	2.32253	1.3051
2004	4	22	3.19388	3.10601	3.19388
2004	4	23	2.56773	2.68773	2.56773
2004	4	24	3.03731	2.98887	3.03731
2004	4	25	3.24242	3.2832	3.24242
2004	4	26	4.21538	4.25368	4.21538
2004	4	27	5.29978	4.09304	5.29978
2004	4	28	3.95551	3.95326	3.95551
2004	4	29	4.41352	4.34621	4.41352
2004	4	30	2.73672	3.2139	2.73672
2004	5	1	3.7965	4.46073	3.7965
2004	5	2	3.56917	4.36983	3.56917
2004	5	3	2.84516	3.54211	2.84516
2004	5	4	3.36377	3.47063	3.36377
2004	5	5	3.64407	3.75411	3.64407
2004	5	6	3.78425	4.54664	3.78425
2004	5	7	4.60659	4.32881	4.60659
2004	5	8	3.11332	3.30927	3.11332
2004	5	9	3.59026	3.67735	3.59026
2004	5	10	5.95142	5.46474	5.95142
2004	5	11	3.025	2.79688	3.025
2004	5	12	3.88778	3.77055	3.88778
2004	5	13	4.22465	3.74081	4.22465
2004	5	14	3.97434	3.88788	3.97434
2004	5	15	3.17949	3.69576	3.17949
2004	5	16	3.98997	4.19562	3.98997
2004	5	17	2.68841	3.67853	2.68841
2004	5	18	4.22434	3.94961	4.22434
2004	5	19	3.6808	3.7603	3.6808
2004	5	20	4.7613	4.55582	4.7613
2004	5	21	4.68892	5.09272	4.68892
2004	5	22	4.37355	4.46632	4.37355
2004	5	23	4.337	4.07395	4.337
2004	5	24	4.44895	4.49716	4.44895
2004	5	25	4.4818	4.68566	4.4818
2004	5	26	4.51651	4.6129	4.51651
2004	5	27	4.40731	4.28004	4.40731
2004	5	28	4.576	4.46525	4.576
2004	5	29	4.25154	3.92792	4.25154
2004	5	30	4.56051	4.24849	4.56051
2004	5	31	3.61743	3.70565	3.61743
2004	6	1	4.17014	4.18384	4.17014
2004	6	2	3.94516	3.91994	3.94516
2004	6	3	4.34686	3.74641	4.34686
2004	6	4	4.60341	4.57083	4.60341
2004	6	5	4.78592	5.41504	4.78592
2004	6	6	4.89911	5.39261	4.89911
2004	6	7	5.0586	4.91146	5.0586
2004	6	8	4.3531	4.18152	4.3531
2004	6	9	4.8826	4.94632	4.8826
2004	6	10	5.19806	5.23503	5.19806
2004	6	11	5.26073	5.0127	5.26073
2004	6	12	5.1128	5.1322	5.1128
2004	6	13	5.13054	5.1948	5.13054
2004	6	14	5.06913	4.96819	5.06913
2004	6	15	5.24307	4.92163	5.24307
2004	6	16	4.85636	4.19357	4.85636
2004	6	17	4.90701	4.1578	4.90701
2004	6	18	4.92615	4.73642	4.92615
2004	6	19	4.30464	4.57872	4.30464
2004	6	20	5.12719	4.18252	5.12719
2004	6	21	4.56553	4.21366	4.56553
2004	6	22	4.31993	4.12101	4.31993
2004	6	23	4.17248	3.95238	4.17248
2004	6	24	4.64124	4.39036	4.64124
2004	6	25	4.54733	4.26753	4.54733
2004	6	26	4.95063	4.32971	4.95063
2004	6	27	5.32793	4.49058	5.32793
2004	6	28	5.23187	4.42588	5.23187
2004	6	29	6.00069	5.68313	6.00069
2004	6	30	5.38292	5.97465	5.38292
2004	7	1	5.20188	5.3665	5.20188
2004	7	2	5.57544	5.47483	5.57544
2004	7	3	5.33506	4.81428	5.33506
2004	7	4	5.26054	4.80174	5.26054
2004	7	5	5.5344	5.11528	5.5344
2004	7	6	5.75361	6.3165	5.75361
2004	7	7	5.57937	5.95351	5.57937
2004	7	8	5.21603	4.76273	5.21603
2004	7	9	4.36678	4.10056	4.36678
2004	7	10	5.6467	5.36149	5.6467
2004	7	11	5.67838	4.91924	5.67838
2004	7	12	5.1478	4.56696	5.1478
2004	7	13	5.24597	4.64935	5.24597
2004	7	14	4.61886	4.50629	4.61886
2004	7	15	5.69289	4.2881	5.69289
2004	7	16	4.85597	4.43346	4.85597
2004	7	17	5.46293	5.14042	5.46293
2004	7	18	5.34573	5.17408	5.34573
2004	7	19	5.57853	5.28323	5.57853
2004	7	20	5.36121	5.14767	5.36121
2004	7	21	5.04865	4.62393	5.04865
2004	7	22	5.28247	5.09284	5.28247
2004	7	23	5.34559	5.01629	5.34559
2004	7	24	4.98856	4.5928	4.98856
2004	7	25	4.85871	4.2062	4.85871
2004	7	26	4.37658	4.43959	4.37658
2004	7	27	4.17411	3.98463	4.17411
2004	7	28	4.09475	4.4119	4.09475
2004	7	29	4.76613	4.82467	4.76613
2004	7	30	4.88448	4.98135	4.88448
2004	7	31	4.67656	4.50766	4.67656
2004	8	1	4.19839	3.60637	4.19839
2004	8	2	4.6071	4.03375	4.6071
2004	8	3	4.2743	3.78134	4.2743
2004	8	4	4.48312	3.92395	4.48312
2004	8	5	4.26912	3.99369	4.26912
2004	8	6	4.34	4.1667	4.34
2004	8	7	4.11036	4.06561	4.11036
2004	8	8	3.97043	3.59977	3.97043
2004	8	9	4.33918	4.02628	4.33918
2004	8	10	3.83328	3.83015	3.83328
2004	8	11	3.86332	3.36313	3.86332
2004	8	12	4.99379	4.7967	4.99379
2004	8	13	4.99371	4.772	4.99371
2004	8	14	4.98959	4.49568	4.98959
2004	8	15	4.52236	4.22394	4.52236
2004	8	16	4.37666	4.00456	4.37666
2004	8	17	4.34923	4.0784	4.34923
2004	8	18	4.54891	4.17459	4.54891
2004	8	19	4.44587	4.17045	4.44587
2004	8	20	4.60074	4.24709	4.60074
2004	8	21	4.47626	4.27043	4.47626
2004	8	22	4.61037	4.36301	4.61037
2004	8	23	4.27766	4.10992	4.27766
2004	8	24	4.56685	4.63566	4.56685
2004	8	25	4.77129	5.07141	4.77129
2004	8	26	4.8437	4.81909	4.8437
2004	8	27	4.74284	4.60473	4.74284
2004	8	28	4.37813	4.35412	4.37813
2004	8	29	4.22415	4.1021	4.22415
2004	8	30	4.21399	4.05173	4.21399
2004	8	31	4.01077	4.2269	4.01077
2004	9	1	3.80732	3.66825	3.80732
2004	9	2	3.7648	3.51965	3.7648
2004	9	3	4.1268	3.93335	4.1268
2004	9	4	4.00992	3.84766	4.00992
2004	9	5	4.03029	3.81803	4.03029
2004	9	6	4.55292	4.26132	4.55292
2004	9	7	4.08527	4.31578	4.08527
2004	9	8	3.82541	4.35523	3.82541
2004	9	9	4.05972	3.62578	4.05972
2004	9	10	3.69105	3.6993	3.69105
2004	9	11	4.49116	3.8819	4.49116
2004	9	12	5.99708	4.04913	5.99708
2004	9	13	3.71055	4.02195	3.71055
2004	9	14	3.80109	4.05838	3.80109
2004	9	15	3.7376	4.27458	3.7376
2004	9	16	3.80884	3.83633	3.80884
2004	9	17	3.6277	3.6287	3.6277
2004	9	18	3.79081	4.28279	3.79081
2004	9	19	3.54032	4.58015	3.54032
2004	9	20	3.63537	4.61031	3.63537
2004	9	21	3.62957	4.35564	3.62957
2004	9	22	3.39737	3.41905	3.39737
2004	9	23	3.22833	3.63998	3.22833
2004	9	24	3.40301	3.97273	3.40301
2004	9	25	3.38769	3.65241	3.38769
2004	9	26	3.28832	3.8942	3.28832
2004	9	27	3.26196	3.8878	3.26196
2004	9	28	3.34264	4.10296	3.34264
2004	9	29	3.38194	4.34719	3.38194
2004	9	30	3.25503	3.81752	3.25503
2004	10	1	2.85413	2.76918	2.85413
2004	10	2	3.28062	2.55735	3.28062
2004	10	3	2.49704	2.86019	2.49704
2004	10	4	2.58601	3.07454	2.58601
2004	10	5	3.55262	3.28051	3.55262
2004	10	6	2.45916	2.72397	2.45916
2004	10	7	2.11594	2.45612	2.11594
2004	10	8	2.71597	2.60026	2.71597
2004	10	9	2.50405	2.44907	2.50405
2004	10	10	2.66027	2.61306	2.66027
2004	10	11	2.66019	3.14644	2.66019
2004	10	12	3.03876	3.37734	3.03876
2004	10	13	2.57017	3.0666	2.57017
2004	10	14	2.58091	2.91958	2.58091
2004	10	15	2.55292	3.22222	2.55292
2004	10	16	2.2935	3.25658	2.2935
2004	10	17	2.49451	3.40383	2.49451
2004	10	18	2.63693	3.40673	2.63693
2004	10	19	2.59633	3.36838	2.59633
2004	10	20	2.42976	2.78581	2.42976
2004	10	21	2.76972	2.87285	2.76972
2004	10	22	2.29695	2.80426	2.29695
2004	10	23	2.41178	3.02891	2.41178
2004	10	24	2.85332	3.12877	2.85332
2004	10	25	3.22765	3.17845	3.22765
2004	10	26	3.31578	3.35979	3.31578
2004	10	27	3.49123	3.20743	3.49123
2004	10	28	2.94075	3.3302	2.94075
2004	10	29	2.73991	2.62514	2.73991
2004	10	30	2.03899	2.59988	2.03899
2004	10	31	2.49222	2.87305	2.49222
2005	4	1	3.53152	2.99139	3.53152
2005	4	2	2.18641	2.1542	2.18641
2005	4	3	1.7393	2.25583	1.7393
2005	4	4	2.60093	2.87026	2.60093
2005	4	5	3.48102	3.21379	3.48102
2005	4	6	3.74359	3.60027	3.74359
2005	4	7	3.64914	3.99941	3.64914
2005	4	8	4.78107	4.17934	4.78107
2005	4	9	4.38098	4.30722	4.38098
2005	4	10	3.8563	4.3981	3.8563
2005	4	11	4.40107	4.95247	4.40107
2005	4	12	4.10114	5.06295	4.10114
2005	4	13	5.21614	4.9304	5.21614
2005	4	14	3.97971	3.07338	3.97971
2005	4	15	3.38203	3.01901	3.38203
2005	4	16	2.7218	2.93062	2.7218
2005	4	17	2.98636	3.25235	2.98636
2005	4	18	1.74854	2.87499	1.74854
2005	4	19	3.28977	3.27352	3.28977
2005	4	20	3.35396	3.08248	3.35396
2005	4	21	3.63706	4.1802	3.63706
2005	4	22	1.57898	2.57319	1.57898
2005	4	23	3.30563	3.65675	3.30563
2005	4	24	4.17024	3.67568	4.17024
2005	4	25	3.85272	3.65258	3.85272
2005	4	26	3.83784	3.50395	3.83784
2005	4	27	3.42226	3.09912	3.42226
2005	4	28	3.69732	3.47238	3.69732
2005	4	29	3.53528	3.85712	3.53528
2005	4	30	2.55861	2.77585	2.55861
2005	5	1	2.8128	3.18205	2.8128
2005	5	2	3.73506	4.36633	3.73506
2005	5	3	4.1671	4.25308	4.1671
2005	5	4	4.14827	3.83288	4.14827
2005	5	5	4.29405	4.52006	4.29405
2005	5	6	2.09436	2.92809	2.09436
2005	5	7	3.83754	4.6845	3.83754
2005	5	8	3.45264	4.25905	3.45264
2005	5	9	3.68054	3.78548	3.68054
2005	5	10	4.39703	4.46192	4.39703
2005	5	11	4.77312	5.76333	4.77312
2005	5	12	4.68206	5.83119	4.68206
2005	5	13	3.39873	3.98769	3.39873
2005	5	14	4.77669	4.91734	4.77669
2005	5	15	4.72993	4.76815	4.72993
2005	5	16	3.56301	4.22394	3.56301
2005	5	17	4.65547	5.09173	4.65547
2005	5	18	5.10538	5.90963	5.10538
2005	5	19	5.08936	5.57075	5.08936
2005	5	20	4.88349	5.64136	4.88349
2005	5	21	4.26696	5.49951	4.26696
2005	5	22	4.8262	4.48173	4.8262
2005	5	23	4.28684	4.20878	4.28684
2005	5	24	4.17917	4.12431	4.17917
2005	5	25	3.90351	3.74812	3.90351
2005	5	26	4.17682	3.86825	4.17682
2005	5	27	5.07035	5.18315	5.07035
2005	5	28	4.04735	3.78964	4.04735
2005	5	29	3.10672	3.78712	3.10672
2005	5	30	2.76038	3.48787	2.76038
2005	5	31	2.67948	2.93652	2.67948
2005	6	1	2.36364	3.51141	2.36364
2005	6	2	3.93141	4.22938	3.93141
2005	6	3	4.27551	4.60899	4.27551
2005	6	4	4.30083	4.64666	4.30083
2005	6	5	4.86901	4.72987	4.86901
2005	6	6	4.76881	4.58347	4.76881
2005	6	7	5.08581	5.59206	5.08581
2005	6	8	5.17476	4.90309	5.17476
2005	6	9	4.77693	4.49839	4.77693
2005	6	10	2.97982	3.63427	2.97982
2005	6	11	4.05965	4.0925	4.05965
2005	6	12	4.28914	4.12703	4.28914
2005	6	13	4.54264	4.2318	4.54264
2005	6	14	5.12276	5.25165	5.12276
2005	6	15	4.24302	4.19915	4.24302
2005	6	16	5.02778	5.04564	5.02778
2005	6	17	5.41218	5.91174	5.41218
2005	6	18	5.10717	4.83882	5.10717
2005	6	19	4.6277	4.24115	4.6277
2005	6	20	4.65255	4.17605	4.65255
2005	6	21	3.95462	4.28021	3.95462
2005	6	22	5.16341	4.73685	5.16341
2005	6	23	5.87348	5.52386	5.87348
2005	6	24	5.37508	5.6678	5.37508
2005	6	25	5.20871	4.71871	5.20871
2005	6	26	5.39897	4.85846	5.39897
2005	6	27	5.59125	5.38808	5.59125
2005	6	28	5.36748	4.76956	5.36748
2005	6	29	4.93239	4.50359	4.93239
2005	6	30	4.49837	4.19419	4.49837
2005	7	1	5.02707	4.03389	5.02707
2005	7	2	4.44972	4.22374	4.44972
2005	7	3	4.37349	4.10452	4.37349
2005	7	4	4.90506	3.94146	4.90506
2005	7	5	4.31745	4.18302	4.31745
2005	7	6	4.79511	4.54442	4.79511
2005	7	7	4.74117	4.0449	4.74117
2005	7	8	4.90545	4.25102	4.90545
2005	7	9	5.11431	4.49233	5.11431
2005	7	10	4.99024	4.30796	4.99024
2005	7	11	5.1262	4.50722	5.1262
2005	7	12	5.22272	4.50187	5.22272
2005	7	13	4.94527	4.27214	4.94527
2005	7	14	4.19603	3.49241	4.19603
2005	7	15	4.70121	3.75867	4.70121
2005	7	16	4.76058	4.3704	4.76058
2005	7	17	5.30206	5.13717	5.30206
2005	7	18	5.28395	4.72449	5.28395
2005	7	19	5.43091	4.91075	5.43091
2005	7	20	5.4627	5.26479	5.4627
2005	7	21	5.37314	5.05789	5.37314
2005	7	22	4.92728	4.59844	4.92728
2005	7	23	4.6205	4.23311	4.6205
2005	7	24	4.56665	4.00634	4.56665
2005	7	25	4.43228	3.84691	4.43228
2005	7	26	4.62655	4.22461	4.62655
2005	7	27	5.10427	4.32763	5.10427
2005	7	28	4.85798	4.67919	4.85798
2005	7	29	4.75519	4.63409	4.75519
2005	7	30	3.99932	3.75894	3.99932
2005	7	31	3.67164	3.77474	3.67164
2005	8	1	4.24391	3.45141	4.24391
2005	8	2	3.76002	4.77467	3.76002
2005	8	3	4.92082	4.69689	4.92082
2005	8	4	5.04883	4.59806	5.04883
2005	8	5	4.52673	4.13299	4.52673
2005	8	6	4.85738	3.92916	4.85738
2005	8	7	5.03531	3.46477	5.03531
2005	8	8	4.72425	4.68452	4.72425
2005	8	9	4.77167	4.2609	4.77167
2005	8	10	4.42151	3.95363	4.42151
2005	8	11	4.65816	4.11414	4.65816
2005	8	12	4.88635	4.64841	4.88635
2005	8	13	4.94557	4.50105	4.94557
2005	8	14	5.08021	4.76508	5.08021
2005	8	15	4.88985	4.52863	4.88985
2005	8	16	4.64022	4.23392	4.64022
2005	8	17	4.45092	4.3248	4.45092
2005	8	18	4.77194	4.45839	4.77194
2005	8	19	4.6122	4.29651	4.6122
2005	8	20	4.10392	4.11601	4.10392
2005	8	21	4.31343	4.2251	4.31343
2005	8	22	4.75291	4.85793	4.75291
2005	8	23	4.77057	4.34362	4.77057
2005	8	24	4.36268	3.91994	4.36268
2005	8	25	4.43033	4.12841	4.43033
2005	8	26	4.35501	4.32812	4.35501
2005	8	27	4.67585	3.76021	4.67585
2005	8	28	4.41605	4.30419	4.41605
2005	8	29	4.51598	4.60881	4.51598
2005	8	30	4.81843	5.40037	4.81843
2005	8	31	5.43926	5.31941	5.43926
2005	9	1	4.41663	3.82867	4.41663
2005	9	2	3.77097	3.49313	3.77097
2005	9	3	3.3926	3.56946	3.3926
2005	9	4	3.43963	3.83518	3.43963
2005	9	5	4.84138	4.17239	4.84138
2005	9	6	4.40752	4.16292	4.40752
2005	9	7	3.98525	4.11361	3.98525
2005	9	8	3.98128	3.87765	3.98128
2005	9	9	3.79568	4.28463	3.79568
2005	9	10	3.86025	3.92488	3.86025
2005	9	11	3.84487	3.83116	3.84487
2005	9	12	3.94197	3.91485	3.94197
2005	9	13	3.9845	4.35219	3.9845
2005	9	14	3.76303	4.13736	3.76303
2005	9	15	3.6269	3.49225	3.6269
2005	9	16	3.42015	3.82011	3.42015
2005	9	17	3.35183	3.45571	3.35183
2005	9	18	3.42521	3.73675	3.42521
2005	9	19	3.68431	3.88027	3.68431
2005	9	20	3.52472	3.48375	3.52472
2005	9	21	3.44834	3.47827	3.44834
2005	9	22	3.76797	3.53061	3.76797
2005	9	23	3.3968	3.17739	3.3968
2005	9	24	3.26155	3.29854	3.26155
2005	9	25	3.40224	3.32325	3.40224
2005	9	26	3.33959	3.54082	3.33959
2005	9	27	3.34034	3.7806	3.34034
2005	9	28	2.71393	3.49397	2.71393
2005	9	29	2.00378	2.77535	2.00378
2005	9	30	3.12147	3.5788	3.12147
2005	10	1	2.79708	2.77744	2.79708
2005	10	2	2.50998	2.59437	2.50998
2005	10	3	2.55539	2.32413	2.55539
2005	10	4	2.72305	3.07668	2.72305
2005	10	5	3.27036	3.25831	3.27036
2005	10	6	2.51647	3.2025	2.51647
2005	10	7	2.50286	3.22825	2.50286
2005	10	8	2.8312	3.25109	2.8312
2005	10	9	2.2592	3.19135	2.2592
2005	10	10	2.73184	3.30598	2.73184
2005	10	11	2.11775	2.92014	2.11775
2005	10	12	2.54992	2.75508	2.54992
2005	10	13	2.26006	3.19137	2.26006
2005	10	14	2.5413	2.75644	2.5413
2005	10	15	2.44921	2.55721	2.44921
2005	10	16	1.70925	2.00251	1.70925
2005	10	17	2.39205	2.20561	2.39205
2005	10	18	1.65467	1.87704	1.65467
2005	10	19	1.54898	1.70826	1.54898
2005	10	20	2.5214	2.28269	2.5214
2005	10	21	2.17633	2.53548	2.17633
2005	10	22	2.69797	2.704	2.69797
2005	10	23	2.69943	2.82758	2.69943
2005	10	24	2.53864	2.9852	2.53864
2005	10	25	2.46983	3.03164	2.46983
2005	10	26	2.27687	3.17477	2.27687
2005	10	27	2.21363	3.06685	2.21363
2005	10	28	2.04464	2.63463	2.04464
2005	10	29	2.31135	2.15012	2.31135
2005	10	30	3.30167	2.30826	3.30167
2005	10	31	1.90645	2.20964	1.90645
2006	4	1	2.75636	3.48684	2.75636
2006	4	2	1.30021	2.34479	1.30021
2006	4	3	3.22873	3.53425	3.22873
2006	4	4	2.81344	3.18021	2.81344
2006	4	5	2.15708	2.36055	2.15708
2006	4	6	2.85948	3.22083	2.85948
2006	4	7	1.31132	2.75302	1.31132
2006	4	8	2.40407	3.23514	2.40407
2006	4	9	4.31795	4.23662	4.31795
2006	4	10	2.75191	2.97353	2.75191
2006	4	11	2.80484	3.12103	2.80484
2006	4	12	1.54354	2.66443	1.54354
2006	4	13	1.74568	2.55306	1.74568
2006	4	14	3.2609	4.22676	3.2609
2006	4	15	3.42227	3.94913	3.42227
2006	4	16	2.95427	3.20069	2.95427
2006	4	17	2.1686	2.75869	2.1686
2006	4	18	2.02123	2.6223	2.02123
2006	4	19	3.23245	3.90434	3.23245
2006	4	20	2.08584	3.44769	2.08584
2006	4	21	2.686	2.98444	2.686
2006	4	22	2.63664	3.39764	2.63664
2006	4	23	4.43176	4.4348	4.43176
2006	4	24	1.69509	2.26579	1.69509
2006	4	25	4.48065	3.52432	4.48065
2006	4	26	5.12457	4.0203	5.12457
2006	4	27	3.73464	3.93718	3.73464
2006	4	28	2.71432	3.62456	2.71432
2006	4	29	4.46582	4.17571	4.46582
2006	4	30	3.19683	2.76252	3.19683
2006	5	1	3.65864	3.23385	3.65864
2006	5	2	3.3341	3.69941	3.3341
2006	5	3	3.59908	4.08314	3.59908
2006	5	4	4.05389	4.48968	4.05389
2006	5	5	3.74217	3.77094	3.74217
2006	5	6	3.91591	4.0545	3.91591
2006	5	7	4.27744	4.35309	4.27744
2006	5	8	4.41856	4.29873	4.41856
2006	5	9	4.01009	4.00473	4.01009
2006	5	10	3.82659	4.2221	3.82659
2006	5	11	3.93051	4.24128	3.93051
2006	5	12	4.3841	4.96174	4.3841
2006	5	13	4.14507	4.41719	4.14507
2006	5	14	4.63984	4.9481	4.63984
2006	5	15	4.82275	5.11554	4.82275
2006	5	16	4.06377	3.8056	4.06377
2006	5	17	1.95859	3.38094	1.95859
2006	5	18	3.715	4.14618	3.715
2006	5	19	4.27776	4.58273	4.27776
2006	5	20	4.4277	4.48149	4.4277
2006	5	21	3.8992	3.96852	3.8992
2006	5	22	4.12418	4.91775	4.12418
2006	5	23	4.2883	4.60949	4.2883
2006	5	24	5.14722	6.11419	5.14722
2006	5	25	5.26407	6.10118	5.26407
2006	5	26	5.09749	5.09854	5.09749
2006	5	27	4.64269	3.88137	4.64269
2006	5	28	4.54611	4.28478	4.54611
2006	5	29	4.70326	5.22679	4.70326
2006	5	30	4.71553	5.21267	4.71553
2006	5	31	5.12061	5.18293	5.12061
2006	6	1	4.18723	4.91881	4.18723
2006	6	2	4.57206	5.14714	4.57206
2006	6	3	4.58931	5.20185	4.58931
2006	6	4	4.76791	5.28146	4.76791
2006	6	5	4.66345	5.17792	4.66345
2006	6	6	4.88012	4.60764	4.88012
2006	6	7	4.6472	4.35722	4.6472
2006	6	8	4.539	4.23391	4.539
2006	6	9	4.87548	4.12645	4.87548
2006	6	10	4.79764	4.7244	4.79764
2006	6	11	4.72279	4.49509	4.72279
2006	6	12	4.77337	4.99035	4.77337
2006	6	13	4.24388	4.34431	4.24388
2006	6	14	4.38993	4.31995	4.38993
2006	6	15	4.73192	4.62298	4.73192
2006	6	16	4.57301	4.26053	4.57301
2006	6	17	4.78335	4.94347	4.78335
2006	6	18	5.13708	5.30289	5.13708
2006	6	19	5.14249	5.66971	5.14249
2006	6	20	5.04497	5.06495	5.04497
2006	6	21	5.00706	5.15953	5.00706
2006	6	22	4.47936	4.48474	4.47936
2006	6	23	4.19186	4.0197	4.19186
2006	6	24	4.58157	4.47759	4.58157
2006	6	25	4.37191	4.48916	4.37191
2006	6	26	4.53283	4.13431	4.53283
2006	6	27	4.06517	3.76641	4.06517
2006	6	28	4.48126	4.13056	4.48126
2006	6	29	3.29135	3.45998	3.29135
2006	6	30	4.43993	4.88181	4.43993
2006	7	1	4.88943	4.3039	4.88943
2006	7	2	4.86667	4.28424	4.86667
2006	7	3	4.27635	4.16409	4.27635
2006	7	4	4.12296	4.08845	4.12296
2006	7	5	4.04286	4.564	4.04286
2006	7	6	4.52825	4.43251	4.52825
2006	7	7	4.64129	4.77527	4.64129
2006	7	8	5.0027	4.59237	5.0027
2006	7	9	4.89278	4.6804	4.89278
2006	7	10	4.71649	4.20921	4.71649
2006	7	11	4.56961	4.15004	4.56961
2006	7	12	4.94785	4.2428	4.94785
2006	7	13	4.02385	4.22247	4.02385
2006	7	14	3.78516	3.75526	3.78516
2006	7	15	4.39966	3.95338	4.39966
2006	7	16	4.7519	4.41826	4.7519
2006	7	17	4.7087	4.33905	4.7087
2006	7	18	4.9382	4.57134	4.9382
2006	7	19	5.04274	4.53889	5.04274
2006	7	20	5.23547	4.32652	5.23547
2006	7	21	4.89071	3.95169	4.89071
2006	7	22	4.68969	4.05275	4.68969
2006	7	23	4.49569	3.98145	4.49569
2006	7	24	4.55306	4.20729	4.55306
2006	7	25	4.76202	4.60605	4.76202
2006	7	26	4.59293	4.09307	4.59293
2006	7	27	4.58788	4.20556	4.58788
2006	7	28	4.70448	4.20691	4.70448
2006	7	29	5.17081	4.76943	5.17081
2006	7	30	5.13462	4.82536	5.13462
2006	7	31	4.75746	4.37807	4.75746
2006	8	1	3.70155	3.82017	3.70155
2006	8	2	4.34451	3.83338	4.34451
2006	8	3	4.52237	4.14697	4.52237
2006	8	4	4.34809	4.02689	4.34809
2006	8	5	4.0246	3.9128	4.0246
2006	8	6	4.63425	3.9592	4.63425
2006	8	7	3.89184	3.53287	3.89184
2006	8	8	4.12569	3.65598	4.12569
2006	8	9	4.22441	4.01434	4.22441
2006	8	10	4.46025	4.25253	4.46025
2006	8	11	4.27274	3.73719	4.27274
2006	8	12	4.43756	3.99348	4.43756
2006	8	13	4.17695	3.57305	4.17695
2006	8	14	4.37501	3.674	4.37501
2006	8	15	4.42898	4.18441	4.42898
2006	8	16	4.42331	4.48327	4.42331
2006	8	17	4.10358	4.03186	4.10358
2006	8	18	4.50104	4.6958	4.50104
2006	8	19	4.34792	3.99846	4.34792
2006	8	20	4.82157	5.53374	4.82157
2006	8	21	4.71776	5.06751	4.71776
2006	8	22	4.63438	4.62125	4.63438
2006	8	23	4.5866	4.54754	4.5866
2006	8	24	4.40482	4.58538	4.40482
2006	8	25	4.1965	4.766	4.1965
2006	8	26	4.1408	4.00785	4.1408
2006	8	27	4.07479	4.07995	4.07479
2006	8	28	3.77646	3.82822	3.77646
2006	8	29	4.04853	3.90039	4.04853
2006	8	30	4.41592	4.5253	4.41592
2006	8	31	4.00916	4.14575	4.00916
2006	9	1	4.02728	3.52076	4.02728
2006	9	2	3.56987	3.48819	3.56987
2006	9	3	3.88211	3.6543	3.88211
2006	9	4	4.03276	3.8643	4.03276
2006	9	5	4.43215	4.47414	4.43215
2006	9	6	4.09067	4.03741	4.09067
2006	9	7	4.55303	4.33867	4.55303
2006	9	8	4.01186	3.88725	4.01186
2006	9	9	3.90415	3.76555	3.90415
2006	9	10	3.75003	4.73019	3.75003
2006	9	11	3.6737	3.36862	3.6737
2006	9	12	3.82066	3.97294	3.82066
2006	9	13	4.22516	4.18808	4.22516
2006	9	14	3.72833	4.01831	3.72833
2006	9	15	3.67658	4.20349	3.67658
2006	9	16	3.70807	4.16534	3.70807
2006	9	17	3.87539	4.56851	3.87539
2006	9	18	3.63578	4.61077	3.63578
2006	9	19	3.42965	4.0209	3.42965
2006	9	20	3.59311	3.31585	3.59311
2006	9	21	3.37526	3.32988	3.37526
2006	9	22	2.488	3.2516	2.488
2006	9	23	2.62585	3.11883	2.62585
2006	9	24	3.42699	3.33152	3.42699
2006	9	25	1.7188	2.19925	1.7188
2006	9	26	3.01052	3.4498	3.01052
2006	9	27	3.36888	3.51547	3.36888
2006	9	28	3.02835	3.58231	3.02835
2006	9	29	1.81639	2.75127	1.81639
2006	9	30	3.49886	3.54325	3.49886
2006	10	1	2.25355	2.29785	2.25355
2006	10	2	2.71782	2.68061	2.71782
2006	10	3	2.80439	2.8003	2.80439
2006	10	4	2.67124	3.01584	2.67124
2006	10	5	2.79674	3.04351	2.79674
2006	10	6	2.59554	3.22381	2.59554
2006	10	7	2.57476	3.11072	2.57476
2006	10	8	2.47708	2.7105	2.47708
2006	10	9	2.51622	2.53121	2.51622
2006	10	10	2.34815	2.7077	2.34815
2006	10	11	2.40451	2.98521	2.40451
2006	10	12	2.43372	2.45155	2.43372
2006	10	13	2.36718	2.71179	2.36718
2006	10	14	2.0704	2.46377	2.0704
2006	10	15	1.89906	2.07832	1.89906
2006	10	16	2.31234	2.53985	2.31234
2006	10	17	1.4479	1.77891	1.4479
2006	10	18	2.69053	2.61379	2.69053
2006	10	19	2.79183	2.82685	2.79183
2006	10	20	1.63213	1.80558	1.63213
2006	10	21	2.19557	2.45009	2.19557
2006	10	22	2.07583	2.44287	2.07583
2006	10	23	2.30914	2.868	2.30914
2006	10	24	2.36738	2.92418	2.36738
2006	10	25	2.16965	2.42097	2.16965
2006	10	26	2.09703	2.46813	2.09703
2006	10	27	2.67266	2.10486	2.67266
2006	10	28	2.63792	2.11813	2.63792
2006	10	29	1.55673	1.90447	1.55673
2006	10	30	1.35195	1.59476	1.35195
2006	10	31	1.88982	2.12052	1.88982
2007	4	1	2.67629	2.58327	2.67629
2007	4	2	2.34337	3.10691	2.34337
2007	4	3	3.13778	3.16354	3.13778
2007	4	4	3.18716	3.10179	3.18716
2007	4	5	2.36937	3.08769	2.36937
2007	4	6	2.76001	3.04847	2.76001
2007	4	7	3.22839	3.5209	3.22839
2007	4	8	3.54639	3.9265	3.54639
2007	4	9	3.42316	3.09915	3.42316
2007	4	10	3.09639	3.09344	3.09639
2007	4	11	3.44586	3.28777	3.44586
2007	4	12	2.79605	3.11953	2.79605
2007	4	13	3.47624	3.74915	3.47624
2007	4	14	3.33368	3.33558	3.33368
2007	4	15	1.88839	2.69711	1.88839
2007	4	16	2.89014	3.27913	2.89014
2007	4	17	2.1315	3.20463	2.1315
2007	4	18	3.3883	3.30145	3.3883
2007	4	19	3.8519	3.37422	3.8519
2007	4	20	3.35241	2.97377	3.35241
2007	4	21	3.42849	3.74271	3.42849
2007	4	22	3.68291	4.01081	3.68291
2007	4	23	4.03422	4.08793	4.03422
2007	4	24	5.00589	3.67351	5.00589
2007	4	25	3.62528	3.94967	3.62528
2007	4	26	3.23934	3.86525	3.23934
2007	4	27	4.63314	3.87144	4.63314
2007	4	28	3.6025	4.16256	3.6025
2007	4	29	2.74517	2.89035	2.74517
2007	4	30	3.70345	3.31741	3.70345
2007	5	1	3.62779	3.76152	3.62779
2007	5	2	3.78939	4.17666	3.78939
2007	5	3	4.49223	5.33789	4.49223
2007	5	4	4.88894	5.27759	4.88894
2007	5	5	4.32567	4.98933	4.32567
2007	5	6	4.93332	5.95241	4.93332
2007	5	7	5.40366	5.9955	5.40366
2007	5	8	4.27562	5.21921	4.27562
2007	5	9	2.62954	3.51269	2.62954
2007	5	10	2.35344	4.00572	2.35344
2007	5	11	1.51823	3.45412	1.51823
2007	5	12	2.14777	3.33412	2.14777
2007	5	13	2.94602	3.35724	2.94602
2007	5	14	3.76519	3.66577	3.76519
2007	5	15	4.2576	4.70036	4.2576
2007	5	16	4.16407	4.67602	4.16407
2007	5	17	2.3731	2.85809	2.3731
2007	5	18	1.96422	2.7453	1.96422
2007	5	19	4.38134	4.84238	4.38134
2007	5	20	5.25933	5.39099	5.25933
2007	5	21	3.81657	3.55026	3.81657
2007	5	22	4.30204	4.63651	4.30204
2007	5	23	4.22705	4.25941	4.22705
2007	5	24	4.53353	4.64765	4.53353
2007	5	25	4.83317	5.79428	4.83317
2007	5	26	4.1658	3.91399	4.1658
2007	5	27	4.35265	4.13762	4.35265
2007	5	28	4.35049	3.5081	4.35049
2007	5	29	3.69744	4.05501	3.69744
2007	5	30	4.97604	5.78222	4.97604
2007	5	31	4.2422	3.66105	4.2422
2007	6	1	4.31502	3.71049	4.31502
2007	6	2	3.76198	4.23531	3.76198
2007	6	3	4.34815	4.33521	4.34815
2007	6	4	3.77687	4.4393	3.77687
2007	6	5	4.49834	4.54005	4.49834
2007	6	6	4.34861	4.4346	4.34861
2007	6	7	5.4638	3.68364	5.4638
2007	6	8	4.1224	4.23104	4.1224
2007	6	9	2.81097	3.95836	2.81097
2007	6	10	3.65501	4.49584	3.65501
2007	6	11	4.10636	3.61405	4.10636
[truncated: 2,711 more rows]

## Sheet: ETo(-Rs,-ea) & Statistics
Year	Month	Day	ETo-missing(-Rs-ea) RsT	ETo-full data
#	#	#	mm/day	mm/day
1998	4	1	2.95735	2.74032
1998	4	2	2.94836	2.12095
1998	4	3	3.04982	2.7115			RMSE, mm/day	MBE, mm/day	MAE, mm/day	RE	d
1998	4	4	3.50194	3.40971			0.661807	0.151014	0.46218	0.156291	0.920665
1998	4	5	3.151	2.97971
1998	4	6	3.10434	3.09217
1998	4	7	3.08928	3.00852
1998	4	8	3.10847	3.08144
1998	4	9	3.19391	3.24399
1998	4	10	3.39981	3.19565
1998	4	11	3.69042	3.6759
1998	4	12	4.17743	4.0979
1998	4	13	4.20677	3.99706
1998	4	14	3.30105	3.31898
1998	4	15	3.11909	2.1991
1998	4	16	3.29101	3.91926
1998	4	17	3.61628	1.72878
1998	4	18	3.6507	3.51869
1998	4	19	3.39829	3.01571
1998	4	20	3.73025	3.17907
1998	4	21	3.52316	3.42363
1998	4	22	3.20537	2.86054
1998	4	23	3.10773	3.23816
1998	4	24	3.30585	3.36769
1998	4	25	3.02393	2.52586
1998	4	26	4.01266	1.57045
1998	4	27	2.52139	1.81772
1998	4	28	2.7672	2.72374
1998	4	29	2.73963	2.79605
1998	4	30	3.00845	3.08039
1998	5	1	3.56992	3.62705
1998	5	2	4.1209	3.60159
1998	5	3	3.96459	3.29516
1998	5	4	4.68727	4.28883
1998	5	5	4.95276	4.21028
1998	5	6	4.08174	3.30881
1998	5	7	3.55698	2.38763
1998	5	8	4.19681	3.70605
1998	5	9	4.605	3.57096
1998	5	10	4.15852	2.84752
1998	5	11	3.39047	3.23132
1998	5	12	3.99871	3.54937
1998	5	13	3.57482	3.00557
1998	5	14	3.10536	2.63219
1998	5	15	3.49406	3.30085
1998	5	16	3.57275	3.70953
1998	5	17	3.74011	2.63077
1998	5	18	4.16439	1.96566
1998	5	19	3.9632	3.31648
1998	5	20	4.18078	2.70039
1998	5	21	4.16863	3.67976
1998	5	22	3.65331	2.83079
1998	5	23	2.95205	2.88726
1998	5	24	3.52826	3.94708
1998	5	25	3.72594	4.18654
1998	5	26	3.78778	3.88993
1998	5	27	4.00791	3.80194
1998	5	28	4.59573	4.03916
1998	5	29	3.75126	4.30259
1998	5	30	3.80046	3.87223
1998	5	31	3.35096	2.85622
1998	6	1	3.68131	4.05917
1998	6	2	3.70095	3.77364
1998	6	3	3.69408	3.66492
1998	6	4	4.33364	4.34613
1998	6	5	4.37163	4.68956
1998	6	6	4.06699	4.37128
1998	6	7	3.97552	4.092
1998	6	8	3.63588	4.16576
1998	6	9	3.49083	3.65447
1998	6	10	3.6091	4.13359
1998	6	11	3.62937	4.3687
1998	6	12	3.46927	3.19814
1998	6	13	3.74095	4.70793
1998	6	14	4.31621	4.75514
1998	6	15	4.32973	4.75326
1998	6	16	3.48848	4.35097
1998	6	17	3.8611	4.60282
1998	6	18	3.70643	4.10278
1998	6	19	3.68952	4.57929
1998	6	20	3.44776	3.17543
1998	6	21	3.71383	3.95576
1998	6	22	4.52408	4.37528
1998	6	23	3.87784	4.71393
1998	6	24	4.05222	4.70857
1998	6	25	4.11924	4.7761
1998	6	26	4.37713	4.71793
1998	6	27	4.06923	4.43791
1998	6	28	4.22266	4.68043
1998	6	29	3.99742	4.78025
1998	6	30	4.11166	4.9225
1998	7	1	4.05028	4.88838
1998	7	2	3.89834	4.83581
1998	7	3	4.7756	5.23286
1998	7	4	4.55455	5.03514
1998	7	5	4.53089	4.16164
1998	7	6	3.53566	3.27821
1998	7	7	3.30493	4.07609
1998	7	8	3.73555	4.27676
1998	7	9	4.25344	4.24753
1998	7	10	3.84151	4.78799
1998	7	11	3.95454	4.79299
1998	7	12	4.2174	4.86931
1998	7	13	4.12164	4.86279
1998	7	14	4.01699	4.86661
1998	7	15	4.11524	4.76198
1998	7	16	3.80706	4.20147
1998	7	17	3.7639	4.16327
1998	7	18	3.28986	4.29616
1998	7	19	3.25177	4.65753
1998	7	20	3.44485	4.52982
1998	7	21	3.40114	4.41038
1998	7	22	3.60387	4.56028
1998	7	23	4.04941	4.59775
1998	7	24	3.29483	3.43404
1998	7	25	3.12739	2.8483
1998	7	26	3.41834	3.681
1998	7	27	3.31804	3.84385
1998	7	28	3.33683	4.50138
1998	7	29	3.40885	4.44112
1998	7	30	3.44188	4.18523
1998	7	31	3.09555	3.90703
1998	8	1	2.95208	3.98641
1998	8	2	2.8224	4.24335
1998	8	3	2.87707	4.21297
1998	8	4	2.90252	4.08808
1998	8	5	3.00154	4.29983
1998	8	6	3.32125	4.21813
1998	8	7	3.42151	4.10563
1998	8	8	3.45041	4.14009
1998	8	9	3.19381	4.09314
1998	8	10	3.61611	4.37034
1998	8	11	2.99892	4.1518
1998	8	12	3.18492	4.25506
1998	8	13	3.0151	4.23917
1998	8	14	3.21847	4.14241
1998	8	15	3.52667	3.98341
1998	8	16	3.18648	4.28676
1998	8	17	3.22392	3.8303
1998	8	18	3.28296	4.04083
1998	8	19	3.43278	4.03215
1998	8	20	3.29082	4.14786
1998	8	21	3.27126	4.12475
1998	8	22	3.27653	3.98336
1998	8	23	2.93909	3.89594
1998	8	24	3.1107	3.87157
1998	8	25	3.02628	3.61109
1998	8	26	2.9744	3.40043
1998	8	27	2.95668	3.49473
1998	8	28	2.95208	3.40567
1998	8	29	2.77636	3.38292
1998	8	30	2.96128	3.25851
1998	8	31	3.02435	3.18417
1998	9	1	2.22885	3.32426
1998	9	2	2.18046	3.53744
1998	9	3	2.34913	3.20326
1998	9	4	2.46091	2.94821
1998	9	5	2.35699	3.12055
1998	9	6	2.57413	3.2588
1998	9	7	2.09776	3.08034
1998	9	8	2.26148	3.02103
1998	9	9	2.31657	3.08539
1998	9	10	2.18404	3.12641
1998	9	11	2.3375	3.17911
1998	9	12	2.22441	2.9102
1998	9	13	2.62736	2.58751
1998	9	14	2.07501	3.07473
1998	9	15	2.04279	2.72175
1998	9	16	2.2072	2.96048
1998	9	17	2.3648	2.96109
1998	9	18	2.34077	3.00306
1998	9	19	2.35646	2.65451
1998	9	20	2.43039	2.8131
1998	9	21	2.24813	2.69085
1998	9	22	2.32765	2.44217
1998	9	23	2.14065	2.09179
1998	9	24	2.23675	2.54536
1998	9	25	2.6518	2.67062
1998	9	26	2.37398	2.52097
1998	9	27	2.38736	2.51857
1998	9	28	2.60873	2.57165
1998	9	29	2.53658	2.65635
1998	9	30	3.0709	2.83603
1998	10	1	3.18328	3.21431
1998	10	2	1.8225	2.14163
1998	10	3	1.68449	2.08954
1998	10	4	1.81212	2.22411
1998	10	5	1.76599	2.25717
1998	10	6	1.63294	2.16295
1998	10	7	1.62654	2.10569
1998	10	8	3.46566	3.36281
1998	10	9	4.87545	4.92998
1998	10	10	2.2991	2.25836
1998	10	11	1.83123	1.86237
1998	10	12	2.44395	2.4295
1998	10	13	3.60706	3.43373
1998	10	14	2.91448	2.91891
1998	10	15	2.2226	2.38487
1998	10	16	2.28614	2.11101
1998	10	17	2.75294	2.70931
1998	10	18	2.26266	2.32329
1998	10	19	1.72378	1.80462
1998	10	20	1.72138	1.82445
1998	10	21	1.89505	1.91375
1998	10	22	1.76387	1.77961
1998	10	23	1.88627	1.92421
1998	10	24	1.68953	1.61982
1998	10	25	2.13821	1.94455
1998	10	26	1.71685	1.64281
1998	10	27	1.66006	1.52408
1998	10	28	1.39904	0.998312
1998	10	29	2.56278	2.27589
1998	10	30	1.64982	1.62723
1998	10	31	1.78592	1.61344
1999	4	1	2.801	2.74429
1999	4	2	3.14108	2.93531
1999	4	3	2.72036	2.05916
1999	4	4	2.78194	2.82063
1999	4	5	2.93015	2.54663
1999	4	6	3.75712	3.00976
1999	4	7	2.76242	1.44237
1999	4	8	2.9448	3.13267
1999	4	9	3.24021	3.08318
1999	4	10	2.79345	2.7143
1999	4	11	2.93917	2.97943
1999	4	12	2.64554	1.29144
1999	4	13	3.25248	3.21721
1999	4	14	3.27269	3.00448
1999	4	15	3.2353	3.61892
1999	4	16	3.29491	3.81686
1999	4	17	3.05837	3.35977
1999	4	18	3.20697	3.19844
1999	4	19	3.30653	3.60617
1999	4	20	3.46599	2.79159
1999	4	21	2.77614	2.84647
1999	4	22	3.63127	4.09525
1999	4	23	3.30633	3.8604
1999	4	24	3.49159	3.41976
1999	4	25	3.77603	4.23201
1999	4	26	3.93647	4.17961
1999	4	27	3.85516	4.36974
1999	4	28	3.42843	3.98304
1999	4	29	3.26915	3.47763
1999	4	30	3.49995	4.14429
1999	5	1	4.20843	4.06634
1999	5	2	4.27397	4.37638
1999	5	3	4.5095	4.57585
1999	5	4	4.2354	4.63627
1999	5	5	4.44207	4.54521
1999	5	6	4.54005	4.72414
1999	5	7	4.82448	3.61626
1999	5	8	4.24789	4.57145
1999	5	9	3.9245	3.85949
1999	5	10	4.18686	4.39409
1999	5	11	4.10833	4.45045
1999	5	12	4.34411	4.44969
1999	5	13	4.59756	4.33985
1999	5	14	4.10254	3.88814
1999	5	15	4.08559	4.15395
1999	5	16	4.06185	4.54897
1999	5	17	3.97512	4.40331
1999	5	18	3.88608	4.22811
1999	5	19	4.31021	4.71097
1999	5	20	6.63346	6.94367
1999	5	21	4.45802	4.46551
1999	5	22	4.41048	4.44944
1999	5	23	4.83711	4.8167
1999	5	24	4.76248	5.13201
1999	5	25	5.22463	5.10375
1999	5	26	3.97827	2.57421
1999	5	27	4.28561	4.58211
1999	5	28	4.40004	4.7543
1999	5	29	4.45486	4.52086
1999	5	30	4.69681	4.62624
1999	5	31	4.25442	4.86613
1999	6	1	4.46498	4.87181
1999	6	2	4.709	5.06725
1999	6	3	5.1335	5.13605
1999	6	4	4.54239	4.85821
1999	6	5	4.75628	5.10476
1999	6	6	4.58518	4.7682
1999	6	7	4.48191	5.21998
1999	6	8	4.50654	5.03481
1999	6	9	4.50025	4.84037
1999	6	10	4.27546	4.81498
1999	6	11	4.0231	3.71829
1999	6	12	4.54218	4.80763
1999	6	13	5.11515	4.58811
1999	6	14	4.14044	3.20425
1999	6	15	4.06526	4.5665
1999	6	16	4.15575	4.95011
1999	6	17	4.40904	5.41882
1999	6	18	4.61147	5.5327
1999	6	19	4.58921	5.27686
1999	6	20	4.43228	5.42484
1999	6	21	4.48191	5.17223
1999	6	22	4.41023	4.7595
1999	6	23	5.16568	5.12882
1999	6	24	4.83927	4.70103
1999	6	25	5.00229	5.04808
1999	6	26	4.60837	4.41492
1999	6	27	4.0215	4.63808
1999	6	28	4.26948	4.66811
1999	6	29	4.3015	5.56526
1999	6	30	4.7569	5.43392
1999	7	1	4.08469	5.48408
1999	7	2	4.35066	4.71909
1999	7	3	4.53354	4.6185
1999	7	4	4.07266	5.13198
1999	7	5	4.36305	5.18473
1999	7	6	4.51031	5.38275
1999	7	7	4.62879	5.52007
1999	7	8	4.93866	4.90379
1999	7	9	4.33622	5.50193
1999	7	10	4.14202	5.71504
1999	7	11	4.40139	5.78041
1999	7	12	4.55308	5.89731
1999	7	13	4.41291	5.62847
1999	7	14	4.67011	5.58003
1999	7	15	4.55647	4.99788
1999	7	16	4.49983	3.9637
1999	7	17	4.18306	4.89905
1999	7	18	4.09752	4.96996
1999	7	19	4.52418	5.15062
1999	7	20	4.45209	5.52974
1999	7	21	4.2948	5.76884
1999	7	22	4.57854	5.58686
1999	7	23	4.60003	5.14532
1999	7	24	4.23049	5.51501
1999	7	25	4.53871	5.49964
1999	7	26	3.77473	4.18713
1999	7	27	3.72024	4.39678
1999	7	28	4.4487	4.8573
1999	7	29	4.02655	5.10895
1999	7	30	3.94209	4.41928
1999	7	31	4.05911	4.23597
1999	8	1	3.78006	4.66775
1999	8	2	3.53407	4.37055
1999	8	3	3.63299	4.45862
1999	8	4	3.7679	4.42042
1999	8	5	3.86082	4.51388
1999	8	6	3.62431	4.62172
1999	8	7	4.03276	5.08391
1999	8	8	3.80694	4.93861
1999	8	9	4.11846	4.68245
1999	8	10	3.70169	4.3802
1999	8	11	3.39264	4.36222
1999	8	12	3.74981	4.94573
1999	8	13	4.0282	5.07655
1999	8	14	3.83804	4.98144
1999	8	15	3.68503	4.3247
1999	8	16	3.6637	4.16255
1999	8	17	3.44961	4.2336
1999	8	18	3.39683	4.35994
1999	8	19	3.5991	4.95661
1999	8	20	3.79911	4.28404
1999	8	21	3.42004	3.8248
1999	8	22	3.6637	3.97582
1999	8	23	3.41017	3.48823
1999	8	24	3.68304	4.03244
1999	8	25	4.19714	4.32928
1999	8	26	3.39761	4.48733
1999	8	27	3.69788	4.5282
1999	8	28	4.48279	5.10568
1999	8	29	4.10157	4.53118
1999	8	30	3.69877	4.36339
1999	8	31	3.65945	4.66558
1999	9	1	3.34311	4.19153
1999	9	2	2.89288	3.95688
1999	9	3	3.05226	4.40916
1999	9	4	3.06164	3.83658
1999	9	5	2.93389	3.96049
1999	9	6	2.84746	3.65806
1999	9	7	2.67726	3.61916
1999	9	8	2.65575	3.93489
1999	9	9	2.87837	3.48499
1999	9	10	2.73915	3.4373
1999	9	11	2.98569	3.82892
1999	9	12	2.81864	2.21081
1999	9	13	2.82747	3.19168
1999	9	14	2.78746	3.03059
1999	9	15	2.93083	2.84909
1999	9	16	2.50862	3.50099
1999	9	17	2.83004	3.42056
1999	9	18	2.77297	3.32453
1999	9	19	2.96954	3.72573
1999	9	20	2.88984	3.07226
1999	9	21	2.9	3.41931
1999	9	22	2.77715	3.41287
1999	9	23	2.80439	3.09536
1999	9	24	2.84829	3.15393
1999	9	25	2.5327	3.17268
1999	9	26	2.71685	3.42187
1999	9	27	2.67048	3.06821
1999	9	28	2.73101	3.03709
1999	9	29	3.00706	3.28872
1999	9	30	4.02378	4.16677
1999	10	1	1.93274	2.88109
1999	10	2	2.17095	2.62288
1999	10	3	2.16605	2.67829
1999	10	4	1.72	2.64881
1999	10	5	1.40811	2.67231
1999	10	6	1.71483	2.4658
1999	10	7	1.69806	2.19778
1999	10	8	1.68657	2.35027
1999	10	9	1.51255	1.63327
1999	10	10	1.76516	2.34846
1999	10	11	1.80352	1.92525
1999	10	12	3.0665	3.23339
1999	10	13	2.10388	2.40093
1999	10	14	1.789	2.09874
1999	10	15	2.03795	2.25406
1999	10	16	2.14142	2.328
1999	10	17	1.86971	2.21236
1999	10	18	2.31921	2.23611
1999	10	19	1.81983	2.16295
1999	10	20	1.88795	2.22651
1999	10	21	1.74172	2.16905
1999	10	22	1.78699	2.23718
1999	10	23	1.38826	1.45379
1999	10	24	2.23344	2.27819
1999	10	25	1.80408	1.56294
1999	10	26	2.0294	2.05384
1999	10	27	1.72506	1.71744
1999	10	28	2.02577	2.09963
1999	10	29	2.17854	2.30175
1999	10	30	2.12167	2.17241
1999	10	31	3.68349	3.76474
2000	4	1	3.11852	2.73968
2000	4	2	4.73905	4.30299
2000	4	3	3.04823	2.94107
2000	4	4	2.65374	2.49095
2000	4	5	2.65864	2.21264
2000	4	6	3.1046	3.34009
2000	4	7	3.67886	3.3978
2000	4	8	3.71861	3.07515
2000	4	9	2.73443	1.75199
2000	4	10	2.97071	3.21447
2000	4	11	2.83586	2.24428
2000	4	12	3.85869	3.09944
2000	4	13	5.35242	3.38433
2000	4	14	3.72235	2.88831
2000	4	15	2.75369	2.86629
2000	4	16	3.0899	3.46448
2000	4	17	4.36634	4.02944
2000	4	18	4.93775	4.52404
2000	4	19	4.65416	2.91399
2000	4	20	2.88818	1.28895
2000	4	21	2.38079	2.1727
2000	4	22	2.01529	1.72482
2000	4	23	2.30271	2.4681
2000	4	24	2.31763	2.27408
2000	4	25	2.69351	2.99893
2000	4	26	2.77221	3.73798
2000	4	27	3.64496	4.10551
2000	4	28	2.73993	1.38814
2000	4	29	2.66039	2.19522
2000	4	30	2.80165	2.84599
2000	5	1	3.5029	4.07173
2000	5	2	3.5195	3.51992
2000	5	3	3.51074	3.56468
2000	5	4	4.7477	3.70653
2000	5	5	3.53408	2.04949
2000	5	6	2.76878	2.13104
2000	5	7	2.95389	3.43816
2000	5	8	3.55367	4.17686
2000	5	9	3.60716	4.38754
2000	5	10	3.88157	4.37948
2000	5	11	4.02799	4.36966
2000	5	12	4.00417	4.37159
2000	5	13	3.66129	4.59678
2000	5	14	3.67504	4.41673
2000	5	15	3.29426	3.73612
2000	5	16	3.49153	3.63137
2000	5	17	3.38363	2.44684
2000	5	18	3.73176	4.39218
2000	5	19	3.84997	4.17496
2000	5	20	3.30825	3.62352
2000	5	21	3.33471	4.13689
2000	5	22	3.57189	4.41023
2000	5	23	3.48229	3.41057
2000	5	24	3.23801	3.38072
2000	5	25	3.912	4.22418
2000	5	26	3.56891	4.11745
2000	5	27	3.98268	4.70512
2000	5	28	4.03282	4.93343
2000	5	29	3.58355	4.94506
2000	5	30	3.43155	3.86764
2000	5	31	3.992	4.79328
2000	6	1	4.34692	5.16976
2000	6	2	3.91523	5.13763
2000	6	3	4.07366	4.75857
2000	6	4	3.78598	4.37111
2000	6	5	3.92929	4.83088
2000	6	6	4.16741	5.04519
2000	6	7	3.84546	4.11802
2000	6	8	3.79452	4.87823
2000	6	9	5.05371	5.68218
2000	6	10	4.55149	2.39974
2000	6	11	4.53263	5.38605
2000	6	12	4.08226	5.15584
2000	6	13	6.5019	6.49051
2000	6	14	7.65995	8.00331
2000	6	15	5.78277	6.46703
2000	6	16	4.38748	5.00005
2000	6	17	4.11899	4.96818
2000	6	18	4.61786	5.08707
2000	6	19	5.25333	5.7593
2000	6	20	5.45768	6.02753
2000	6	21	4.17481	4.98268
2000	6	22	4.65648	5.19022
2000	6	23	4.74522	5.23162
2000	6	24	4.33076	5.14083
2000	6	25	4.31533	5.49887
2000	6	26	4.38307	5.35083
2000	6	27	4.18973	5.19051
2000	6	28	3.98352	4.77148
2000	6	29	4.02861	5.47042
2000	6	30	4.12026	5.19975
2000	7	1	4.08843	5.21082
2000	7	2	3.9828	5.20686
2000	7	3	4.31389	5.62704
2000	7	4	4.21153	5.4032
2000	7	5	4.11575	5.42583
2000	7	6	4.14931	5.21942
2000	7	7	3.83284	5.35252
2000	7	8	4.12241	5.37314
2000	7	9	4.22489	5.44364
2000	7	10	3.84686	5.21695
2000	7	11	3.54919	5.18942
2000	7	12	3.68401	5.49089
2000	7	13	3.57813	5.49597
2000	7	14	3.38925	4.41606
2000	7	15	3.73226	4.99207
2000	7	16	3.19794	5.11253
2000	7	17	3.76927	4.56291
2000	7	18	3.41258	4.4702
2000	7	19	3.26639	4.91793
2000	7	20	3.71123	4.85706
2000	7	21	3.5777	4.99259
2000	7	22	3.65466	5.05333
2000	7	23	3.68199	4.77328
2000	7	24	3.50434	5.05377
2000	7	25	3.6772	5.14466
2000	7	26	3.57136	5.17206
2000	7	27	3.59985	5.12652
2000	7	28	3.81233	5.31539
2000	7	29	3.45429	4.73429
2000	7	30	3.40492	4.96481
2000	7	31	3.70909	5.19403
2000	8	1	3.41395	4.96485
2000	8	2	4.49587	5.40864
2000	8	3	4.50479	5.34695
2000	8	4	5.01973	5.92903
2000	8	5	3.12669	4.5018
2000	8	6	3.0272	4.6677
2000	8	7	2.94791	4.72231
2000	8	8	3.06406	4.67203
2000	8	9	3.01097	4.57779
2000	8	10	2.7612	4.06374
2000	8	11	2.78061	4.03314
2000	8	12	2.64332	3.56279
2000	8	13	2.55125	3.82692
2000	8	14	2.8662	4.4024
2000	8	15	3.36071	4.5289
2000	8	16	3.39207	4.49977
2000	8	17	3.06027	4.6453
2000	8	18	2.99168	4.51948
2000	8	19	3.22413	4.08643
2000	8	20	2.8919	4.26498
2000	8	21	2.95076	4.31716
2000	8	22	3.00362	4.238
2000	8	23	2.90389	4.15628
2000	8	24	2.88005	3.4213
2000	8	25	2.97423	4.14682
2000	8	26	3.50132	3.4461
2000	8	27	3.09736	3.53677
2000	8	28	3.59675	4.23003
2000	8	29	3.149	4.03413
2000	8	30	3.08337	3.99477
2000	8	31	4.06437	4.42871
2000	9	1	3.21513	4.08638
2000	9	2	3.41481	4.16393
2000	9	3	3.35082	3.58876
2000	9	4	3.11638	4.02355
2000	9	5	3.11213	4.16469
2000	9	6	3.71984	3.55424
2000	9	7	4.42778	4.34013
2000	9	8	3.1031	3.89098
2000	9	9	3.24344	3.87097
2000	9	10	3.32685	4.0496
2000	9	11	3.10016	3.83821
2000	9	12	3.51785	3.99942
2000	9	13	3.22804	3.64368
2000	9	14	3.54263	3.38232
2000	9	15	2.99308	3.46296
2000	9	16	2.88262	3.42142
2000	9	17	3.21966	3.26846
2000	9	18	2.96683	3.60655
2000	9	19	3.1159	3.79975
2000	9	20	3.27612	3.8403
2000	9	21	3.11408	3.61951
2000	9	22	4.95449	5.11739
2000	9	23	3.22568	3.79524
2000	9	24	3.47919	3.50817
2000	9	25	3.25641	3.34495
2000	9	26	3.35094	3.06965
2000	9	27	3.13952	3.2229
2000	9	28	3.08356	2.20895
2000	9	29	2.64396	2.03451
2000	9	30	2.98626	3.21166
2000	10	1	2.00884	2.58738
2000	10	2	2.55807	2.94186
2000	10	3	2.05473	2.55043
2000	10	4	2.90045	3.23137
2000	10	5	3.08993	3.31783
2000	10	6	2.50661	2.77961
2000	10	7	2.5138	2.79359
2000	10	8	2.70908	2.43763
2000	10	9	2.80271	2.74717
2000	10	10	1.82439	1.51194
2000	10	11	2.12306	2.44175
2000	10	12	1.85781	2.19843
2000	10	13	2.64721	2.89319
2000	10	14	3.43271	3.468
2000	10	15	3.54526	3.38268
2000	10	16	2.22284	2.60365
2000	10	17	2.31801	2.57686
2000	10	18	2.71467	2.58936
2000	10	19	1.99297	2.29272
2000	10	20	1.79413	0.930601
2000	10	21	2.17729	2.29461
2000	10	22	1.96304	1.89415
2000	10	23	1.71732	1.85284
2000	10	24	2.15163	1.30468
2000	10	25	1.86847	1.59209
2000	10	26	1.73382	1.87461
2000	10	27	1.89895	2.07709
2000	10	28	2.05327	1.95004
2000	10	29	1.84223	1.05567
2000	10	30	2.37577	2.26771
2000	10	31	2.31433	2.33413
2001	4	1	4.92047	4.46101
2001	4	2	3.0717	1.6958
2001	4	3	3.5937	3.47675
2001	4	4	3.41893	3.2574
2001	4	5	3.19937	2.95191
2001	4	6	3.60268	2.78482
2001	4	7	3.60854	2.96776
2001	4	8	3.88541	3.8918
2001	4	9	3.7176	3.31822
2001	4	10	3.47286	2.83829
2001	4	11	3.48621	3.2366
2001	4	12	3.77905	3.96323
2001	4	13	3.53917	3.36142
2001	4	14	3.53683	1.96264
2001	4	15	3.59571	3.45722
2001	4	16	3.29483	3.14691
2001	4	17	3.75178	3.50472
2001	4	18	4.24039	3.70887
2001	4	19	4.39895	3.89711
2001	4	20	3.66299	3.9823
2001	4	21	3.47657	3.36446
2001	4	22	4.66385	3.50126
2001	4	23	5.24412	4.5255
2001	4	24	3.93707	4.33928
2001	4	25	3.98291	4.33103
2001	4	26	3.79955	3.83245
2001	4	27	3.98719	4.22546
2001	4	28	4.71733	4.86903
2001	4	29	5.41348	5.56483
2001	4	30	5.63871	5.60161
2001	5	1	6.11245	4.43129
2001	5	2	5.82649	6.144
2001	5	3	4.04587	3.82617
2001	5	4	4.32883	4.49215
2001	5	5	4.2921	4.54459
2001	5	6	4.38739	3.04615
2001	5	7	4.4758	3.91936
2001	5	8	3.7415	2.24441
2001	5	9	3.59926	2.06196
2001	5	10	2.70596	2.01975
2001	5	11	3.11859	1.9682
2001	5	12	3.95618	4.03798
2001	5	13	5.63305	3.91107
2001	5	14	4.97858	4.24509
2001	5	15	3.51155	3.14528
2001	5	16	3.94019	3.73313
2001	5	17	4.33418	4.82024
2001	5	18	4.78792	5.15848
2001	5	19	4.87182	5.24794
2001	5	20	4.8302	4.73052
2001	5	21	4.93812	5.42606
2001	5	22	4.73023	5.04552
2001	5	23	4.9272	5.10573
2001	5	24	5.94484	5.99639
2001	5	25	6.30855	6.67583
2001	5	26	4.81122	4.96882
2001	5	27	4.93975	5.16007
2001	5	28	5.07111	5.07738
2001	5	29	5.14393	5.66953
2001	5	30	4.88608	5.25863
2001	5	31	4.68474	5.30772
2001	6	1	5.30477	5.59181
2001	6	2	5.60975	5.64575
2001	6	3	5.37411	5.76467
2001	6	4	4.72627	5.26427
2001	6	5	5.12647	4.8275
2001	6	6	5.65867	5.22663
2001	6	7	5.0208	5.49244
2001	6	8	4.7813	5.18366
2001	6	9	5.12374	5.50466
2001	6	10	5.6128	6.02251
2001	6	11	5.93312	6.06561
2001	6	12	5.80348	5.95407
2001	6	13	5.52617	5.84806
2001	6	14	5.58488	5.89648
2001	6	15	5.46264	5.83636
2001	6	16	4.83931	4.31944
2001	6	17	6.19545	6.91959
2001	6	18	5.059	5.81187
2001	6	19	5.07544	5.75463
2001	6	20	4.96241	5.65404
2001	6	21	5.1735	5.73459
2001	6	22	5.58271	6.10709
2001	6	23	4.99938	5.30728
2001	6	24	4.83384	5.63866
2001	6	25	5.19234	5.54935
2001	6	26	4.89212	5.49453
2001	6	27	4.7258	4.78015
2001	6	28	4.7809	5.43555
2001	6	29	5.54046	6.05242
2001	6	30	5.47101	6.22867
2001	7	1	5.22233	5.38833
2001	7	2	5.03829	5.42159
2001	7	3	5.14415	5.11683
2001	7	4	5.12109	5.0974
2001	7	5	5.19636	5.05726
2001	7	6	5.48205	5.72079
2001	7	7	5.35463	5.30945
2001	7	8	5.36441	5.89591
2001	7	9	5.56714	6.36804
2001	7	10	5.27107	5.88971
2001	7	11	5.33156	5.73157
2001	7	12	5.18384	5.65372
2001	7	13	5.05631	4.95756
2001	7	14	5.0868	5.02329
2001	7	15	4.87647	4.55002
2001	7	16	5.00355	4.48206
2001	7	17	4.87431	5.25309
2001	7	18	5.24591	5.3914
2001	7	19	5.02966	5.07135
2001	7	20	4.8054	5.65297
2001	7	21	5.32206	5.81372
2001	7	22	4.48832	5.38762
2001	7	23	4.91876	5.64344
2001	7	24	4.87404	5.39834
2001	7	25	4.92794	5.21436
2001	7	26	5.03114	5.02422
2001	7	27	4.80465	5.0006
2001	7	28	4.31954	3.94294
2001	7	29	4.7228	4.24374
2001	7	30	4.59977	4.3377
2001	7	31	4.77652	4.11314
2001	8	1	4.93973	5.20024
2001	8	2	4.58805	4.91945
2001	8	3	4.41111	5.12823
2001	8	4	4.44935	4.43011
2001	8	5	4.9261	5.07979
2001	8	6	4.82854	4.70145
2001	8	7	4.38345	5.12883
2001	8	8	4.59035	4.80051
2001	8	9	4.34533	4.89024
2001	8	10	4.37711	5.32482
2001	8	11	4.61398	5.19406
2001	8	12	4.47742	4.55816
2001	8	13	4.47626	4.56617
2001	8	14	4.5462	5.03396
2001	8	15	4.29431	5.12698
2001	8	16	4.40697	4.83303
2001	8	17	4.89194	5.05542
2001	8	18	5.4432	4.36459
2001	8	19	4.49393	4.06163
2001	8	20	4.7891	4.8656
2001	8	21	4.35954	4.94314
2001	8	22	4.47359	5.12019
2001	8	23	4.42873	5.03992
2001	8	24	4.53386	5.15174
2001	8	25	4.50529	5.06307
2001	8	26	4.48985	4.81599
2001	8	27	4.43971	5.115
2001	8	28	4.57153	4.8241
2001	8	29	4.70671	4.80778
2001	8	30	4.9965	4.6959
2001	8	31	4.78423	4.75357
2001	9	1	3.31535	4.47903
2001	9	2	3.24514	4.42924
2001	9	3	3.70907	4.38848
2001	9	4	3.47935	4.10853
2001	9	5	4.11744	4.40874
2001	9	6	4.01415	4.19897
2001	9	7	3.91839	3.22627
2001	9	8	4.14531	4.22871
2001	9	9	3.7627	3.81327
2001	9	10	3.48106	4.24178
2001	9	11	3.31552	3.70131
2001	9	12	3.44954	3.87476
2001	9	13	3.44165	4.01048
2001	9	14	3.4126	3.76844
2001	9	15	3.61293	4.00941
2001	9	16	3.36075	3.88635
2001	9	17	3.2379	3.97942
2001	9	18	3.47881	3.97065
2001	9	19	3.59199	3.93323
2001	9	20	3.35112	4.00407
2001	9	21	3.41023	3.85015
2001	9	22	3.28368	3.71384
2001	9	23	3.10179	3.72106
2001	9	24	3.51187	3.84246
2001	9	25	3.29718	3.74329
2001	9	26	3.21134	3.45832
2001	9	27	3.4525	3.64527
2001	9	28	3.55922	3.8273
2001	9	29	3.99679	3.90785
2001	9	30	3.57461	3.71615
2001	10	1	2.70065	2.99028
2001	10	2	2.45785	2.92933
2001	10	3	2.38851	2.81854
2001	10	4	2.67023	3.08717
2001	10	5	2.85683	2.75694
2001	10	6	3.28989	3.22805
2001	10	7	2.6265	2.99889
2001	10	8	2.49208	2.93042
2001	10	9	4.29487	4.35388
2001	10	10	2.37205	2.87194
2001	10	11	2.23543	2.7577
2001	10	12	2.11712	2.70728
2001	10	13	2.06533	2.36746
2001	10	14	2.33668	2.46397
2001	10	15	2.26321	2.62431
2001	10	16	2.69538	2.76616
2001	10	17	2.33433	2.54656
2001	10	18	2.44414	2.57795
2001	10	19	2.88526	2.95936
2001	10	20	2.23135	2.39935
2001	10	21	2.58395	2.59149
2001	10	22	2.41284	2.46627
2001	10	23	2.83171	2.67812
2001	10	24	2.87783	2.64184
2001	10	25	3.2665	3.03664
2001	10	26	3.42215	3.63422
2001	10	27	3.06015	2.85303
2001	10	28	2.38602	1.53496
2001	10	29	1.99182	1.81676
2001	10	30	1.95116	1.99102
2001	10	31	1.93102	1.96357
2002	4	1	3.32919	1.53546
2002	4	2	2.60245	1.98592
2002	4	3	3.36771	3.288
2002	4	4	2.77051	1.67658
2002	4	5	3.48342	3.33261
2002	4	6	3.53086	1.92789
2002	4	7	3.50648	3.30571
2002	4	8	3.54355	2.93949
2002	4	9	3.33599	3.31957
2002	4	10	3.6137	3.69638
2002	4	11	3.96974	3.96889
2002	4	12	3.6114	3.63671
2002	4	13	2.88214	1.81506
2002	4	14	3.25722	3.4274
2002	4	15	3.67708	2.47895
2002	4	16	3.12499	1.95728
2002	4	17	3.71054	3.62063
2002	4	18	3.58925	2.94741
2002	4	19	2.86829	1.79813
2002	4	20	3.06634	2.76972
2002	4	21	3.19637	3.18008
2002	4	22	3.18813	2.13044
2002	4	23	2.95257	2.70571
2002	4	24	2.87391	2.17836
2002	4	25	3.34584	3.3889
2002	4	26	3.49657	3.34027
2002	4	27	3.4645	3.44821
2002	4	28	3.66368	3.954
2002	4	29	3.48713	3.4884
2002	4	30	3.6153	3.95451
2002	5	1	4.29182	4.23509
2002	5	2	3.65273	2.3895
2002	5	3	4.05619	3.69969
2002	5	4	4.29264	3.88989
2002	5	5	4.35135	3.72093
2002	5	6	4.46949	4.81647
2002	5	7	4.68049	4.26487
2002	5	8	4.57475	4.14161
2002	5	9	4.85999	4.8285
2002	5	10	4.55822	4.58899
2002	5	11	4.92855	4.49398
2002	5	12	4.37487	3.81513
2002	5	13	4.37038	3.89265
2002	5	14	3.69077	2.45442
2002	5	15	3.90191	2.87881
2002	5	16	4.71501	4.40795
2002	5	17	4.32	4.31658
2002	5	18	4.39699	2.4038
2002	5	19	4.30032	4.00557
2002	5	20	4.40193	4.48821
2002	5	21	4.63075	4.22899
2002	5	22	4.41809	4.51183
2002	5	23	4.50896	3.27202
2002	5	24	4.41091	4.61788
2002	5	25	4.50769	4.85464
2002	5	26	5.24616	5.32793
2002	5	27	4.64225	4.49287
2002	5	28	4.55076	4.39414
2002	5	29	4.43283	4.02274
2002	5	30	4.83223	4.58925
2002	5	31	4.65426	4.53689
2002	6	1	4.63202	3.18313
2002	6	2	4.71016	4.6623
2002	6	3	5.04886	5.20299
2002	6	4	5.05484	4.55623
2002	6	5	4.83868	3.67692
2002	6	6	4.97207	4.93375
2002	6	7	5.21773	5.37389
2002	6	8	5.16962	4.9303
2002	6	9	5.79732	5.49133
2002	6	10	5.5261	5.52072
2002	6	11	5.57556	5.47261
2002	6	12	5.23023	4.74747
2002	6	13	5.00354	5.02829
2002	6	14	5.16608	5.44521
2002	6	15	5.22156	5.3582
2002	6	16	5.06607	4.74165
2002	6	17	5.16568	4.54077
2002	6	18	5.21948	5.13659
2002	6	19	6.34627	6.75725
2002	6	20	5.96798	6.19138
2002	6	21	7.57556	7.51953
2002	6	22	5.08449	5.38212
2002	6	23	5.22802	5.39072
2002	6	24	4.83139	5.22538
2002	6	25	4.86545	5.10903
2002	6	26	4.66103	3.8961
2002	6	27	4.81112	5.03295
2002	6	28	4.84661	4.65925
2002	6	29	5.1173	5.35527
2002	6	30	5.18344	5.68488
2002	7	1	4.93505	5.04168
2002	7	2	4.89327	4.6613
2002	7	3	4.73178	4.84904
2002	7	4	5.00827	5.55604
2002	7	5	5.05473	5.72507
2002	7	6	5.08833	5.62484
2002	7	7	4.96916	5.6402
2002	7	8	5.33731	4.99157
2002	7	9	4.96655	4.70982
2002	7	10	5.31997	5.1667
2002	7	11	4.92585	4.52065
2002	7	12	4.73111	4.58957
2002	7	13	4.48584	4.25163
2002	7	14	4.52715	4.31455
2002	7	15	4.78325	5.35668
2002	7	16	5.17302	5.61327
2002	7	17	5.17015	5.8019
2002	7	18	4.9085	5.72462
2002	7	19	5.14779	5.43484
2002	7	20	5.05655	5.55924
2002	7	21	4.69818	5.23125
2002	7	22	4.67676	4.95703
2002	7	23	5.02966	5.03883
2002	7	24	6.4068	6.65979
2002	7	25	5.39501	5.95942
2002	7	26	5.22242	5.329
2002	7	27	4.98605	5.09231
2002	7	28	4.80632	5.45092
2002	7	29	4.79928	5.57728
2002	7	30	5.31785	5.59705
2002	7	31	5.06989	5.59529
2002	8	1	4.79487	5.33185
2002	8	2	5.83947	5.60477
2002	8	3	4.5969	4.50297
2002	8	4	4.16042	4.54122
2002	8	5	4.69809	4.76047
2002	8	6	4.90743	4.9582
2002	8	7	4.54253	5.18527
2002	8	8	5.32358	4.81974
2002	8	9	4.99187	4.60315
2002	8	10	4.55536	4.96406
2002	8	11	4.4889	5.34546
2002	8	12	4.92856	5.66269
2002	8	13	4.80634	5.40699
2002	8	14	5.62964	4.928
2002	8	15	4.65028	4.67316
2002	8	16	5.0033	4.17677
2002	8	17	4.88981	4.17924
2002	8	18	4.6325	3.31666
2002	8	19	3.78922	4.37036
2002	8	20	4.28892	4.5184
2002	8	21	4.40183	4.25968
2002	8	22	4.31077	4.55493
2002	8	23	4.3057	4.91813
2002	8	24	4.39046	4.97452
2002	8	25	4.46135	4.92916
2002	8	26	4.41193	5.00399
2002	8	27	4.46568	4.93154
2002	8	28	4.55814	4.71022
2002	8	29	5.0292	4.86456
2002	8	30	4.5821	4.56524
2002	8	31	4.45401	4.14941
2002	9	1	3.74268	3.97581
2002	9	2	3.63611	4.18005
2002	9	3	3.77661	4.14112
2002	9	4	3.86187	4.04602
2002	9	5	3.39213	3.54231
2002	9	6	3.51577	3.8464
2002	9	7	3.55377	3.40561
2002	9	8	3.71999	3.67758
2002	9	9	3.89297	4.03185
2002	9	10	3.27791	3.31849
2002	9	11	3.97422	3.59597
2002	9	12	3.9728	3.23729
2002	9	13	3.65682	3.75802
2002	9	14	3.33187	3.62782
2002	9	15	3.77458	3.68398
2002	9	16	3.25518	3.67305
2002	9	17	3.5756	3.78813
2002	9	18	3.90383	3.87318
2002	9	19	4.00863	4.32194
2002	9	20	3.4087	3.62614
2002	9	21	3.94905	3.9602
2002	9	22	4.14379	4.15627
2002	9	23	3.47234	3.49633
2002	9	24	3.00949	3.15119
2002	9	25	3.26679	3.41097
2002	9	26	3.19645	3.28084
2002	9	27	3.24892	3.14065
2002	9	28	3.71063	3.43173
2002	9	29	3.2274	3.39985
2002	9	30	3.03151	3.31849
2002	10	1	2.17872	2.78046
2002	10	2	2.7639	1.98066
2002	10	3	3.01636	3.08205
2002	10	4	2.36546	2.66046
2002	10	5	2.43858	2.65277
2002	10	6	2.57652	2.7363
2002	10	7	1.98614	1.96004
2002	10	8	2.61666	2.55881
2002	10	9	2.18722	2.55378
2002	10	10	2.1725	2.65602
2002	10	11	2.39689	2.66633
2002	10	12	2.18269	2.65359
2002	10	13	2.51813	2.7336
2002	10	14	2.62492	1.8316
2002	10	15	2.81414	2.66097
2002	10	16	2.05032	1.96396
2002	10	17	1.87292	2.13427
2002	10	18	2.45353	2.52691
2002	10	19	2.26223	2.46584
2002	10	20	2.40811	2.25592
2002	10	21	3.83929	3.81198
2002	10	22	2.62365	2.62094
2002	10	23	2.22715	2.24123
2002	10	24	2.20012	2.21084
2002	10	25	2.12803	2.08859
2002	10	26	1.99518	2.1744
2002	10	27	2.17678	2.27737
2002	10	28	2.07739	2.1909
2002	10	29	2.37981	2.22505
2002	10	30	3.51891	3.73411
2002	10	31	2.35057	2.22904
2003	4	1	3.27468	2.99259
2003	4	2	3.40964	2.35287
2003	4	3	4.40984	3.16313
2003	4	4	4.52674	3.73815
2003	4	5	4.81817	3.78239
2003	4	6	4.2193	3.84597
2003	4	7	3.31104	3.00331
2003	4	8	3.86061	3.72032
2003	4	9	3.74441	3.42812
2003	4	10	3.40762	3.31858
2003	4	11	3.92429	3.83932
2003	4	12	3.98623	3.83067
2003	4	13	3.8152	3.68871
2003	4	14	2.97598	2.08426
2003	4	15	2.21983	1.44931
2003	4	16	3.03747	3.32203
2003	4	17	2.95574	2.0137
2003	4	18	3.08029	1.63594
2003	4	19	4.3635	3.42779
2003	4	20	3.26238	2.31818
2003	4	21	3.42802	2.62057
2003	4	22	3.23217	3.13678
2003	4	23	2.91337	2.01448
2003	4	24	4.40237	3.51757
2003	4	25	3.3067	1.01636
2003	4	26	2.97748	2.18971
2003	4	27	3.91256	4.19685
2003	4	28	3.50307	3.8482
2003	4	29	3.39352	2.90478
2003	4	30	3.68198	3.78062
2003	5	1	4.99454	4.68524
2003	5	2	5.69441	5.67676
2003	5	3	5.12057	5.16127
2003	5	4	5.20133	5.39597
2003	5	5	5.22739	5.30736
2003	5	6	5.19548	5.34394
2003	5	7	6.45106	6.93122
2003	5	8	6.12104	6.50763
2003	5	9	5.94162	6.17696
2003	5	10	5.85063	5.87816
2003	5	11	5.82214	5.77667
2003	5	12	5.26889	5.30852
2003	5	13	5.25539	5.21726
2003	5	14	5.66783	5.46076
2003	5	15	4.58103	4.21416
2003	5	16	4.66756	4.72843
2003	5	17	4.8007	4.55348
2003	5	18	5.00262	5.21905
2003	5	19	4.94176	5.28778
2003	5	20	4.766	5.15958
2003	5	21	4.76121	4.67023
2003	5	22	4.6469	4.72355
2003	5	23	4.40614	5.03451
2003	5	24	4.60567	4.94353
2003	5	25	4.83401	5.46132
2003	5	26	4.79904	4.86623
2003	5	27	4.53205	4.89367
2003	5	28	4.5264	3.98446
2003	5	29	3.65643	3.18624
2003	5	30	5.36052	2.95091
2003	5	31	3.97017	2.36862
2003	6	1	4.65099	4.49216
2003	6	2	4.2326	3.88288
2003	6	3	4.49836	4.43513
2003	6	4	4.67299	4.87725
2003	6	5	5.90201	6.17669
2003	6	6	5.61222	6.02311
2003	6	7	5.47915	5.67673
2003	6	8	4.46265	3.16381
2003	6	9	4.65088	4.3511
2003	6	10	4.54075	4.06771
2003	6	11	4.62442	4.54371
2003	6	12	4.64578	4.1812
2003	6	13	4.94124	5.24422
2003	6	14	5.07114	5.59882
2003	6	15	5.03737	5.63862
2003	6	16	5.04692	5.47385
2003	6	17	4.9255	4.68541
2003	6	18	5.31536	5.54025
2003	6	19	4.81112	5.59297
2003	6	20	5.02366	5.18259
2003	6	21	4.92306	4.5104
2003	6	22	5.05398	4.45969
2003	6	23	5.00241	5.42122
2003	6	24	5.28233	5.76902
2003	6	25	5.47325	6.11068
2003	6	26	5.505	5.6294
2003	6	27	5.25093	5.07363
2003	6	28	4.86491	4.68692
2003	6	29	4.97243	5.29741
2003	6	30	5.37133	5.70774
2003	7	1	5.23081	5.91088
2003	7	2	5.03941	5.55066
2003	7	3	4.96648	5.72415
2003	7	4	5.04051	5.76501
2003	7	5	5.74277	5.92507
2003	7	6	4.72731	4.01945
2003	7	7	4.8643	4.77281
2003	7	8	5.0026	5.34512
2003	7	9	5.21858	4.69514
2003	7	10	4.50548	5.20797
2003	7	11	4.96916	5.51269
2003	7	12	5.12903	5.56036
2003	7	13	5.52211	5.25678
2003	7	14	5.14253	4.88398
2003	7	15	5.01577	4.94282
2003	7	16	5.00006	5.31529
2003	7	17	5.01216	5.25279
2003	7	18	5.06423	5.44032
2003	7	19	5.35957	5.80401
2003	7	20	5.00309	5.57669
2003	7	21	4.47388	5.27952
2003	7	22	4.13657	5.34253
2003	7	23	3.96798	5.48498
2003	7	24	3.96804	5.1952
2003	7	25	3.58088	5.05565
2003	7	26	3.75446	5.22715
2003	7	27	3.36155	5.00425
2003	7	28	3.76463	5.05534
2003	7	29	3.62403	4.92682
2003	7	30	3.52083	5.08994
2003	7	31	3.26552	4.83894
2003	8	1	2.95508	4.98453
2003	8	2	3.06929	4.93868
2003	8	3	3.11629	4.88334
2003	8	4	2.8556	4.57773
2003	8	5	2.92014	4.03817
2003	8	6	2.76025	4.49031
2003	8	7	2.84047	4.77938
2003	8	8	2.94595	3.82767
2003	8	9	2.85026	4.48239
2003	8	10	3.13352	4.60971
2003	8	11	3.25155	4.88063
2003	8	12	3.08627	4.38064
2003	8	13	3.19518	4.68503
2003	8	14	3.08633	4.66228
2003	8	15	3.47619	4.31138
2003	8	16	3.43636	4.29912
2003	8	17	3.17058	4.81289
2003	8	18	3.11973	4.66528
2003	8	19	3.24058	4.30523
2003	8	20	3.13685	4.74232
2003	8	21	3.38163	4.34389
2003	8	22	3.41098	4.53466
2003	8	23	3.035	4.62343
2003	8	24	3.25721	4.53009
2003	8	25	3.09481	4.05276
2003	8	26	3.50085	4.29932
2003	8	27	3.0956	3.79939
2003	8	28	3.12838	3.96663
2003	8	29	2.98242	4.16643
2003	8	30	3.20167	4.4036
2003	8	31	3.22691	4.53355
2003	9	1	2.42069	4.19789
2003	9	2	2.62145	3.78758
2003	9	3	2.58662	3.76332
2003	9	4	2.82351	3.41733
2003	9	5	3.81122	3.21656
2003	9	6	3.69353	4.15795
2003	9	7	3.99542	4.40854
2003	9	8	3.20635	3.71475
2003	9	9	3.10998	3.57583
2003	9	10	2.72306	3.33092
2003	9	11	2.71983	2.92158
2003	9	12	3.20663	3.48673
2003	9	13	3.59167	3.37991
2003	9	14	2.96491	3.3308
2003	9	15	2.62954	3.01699
2003	9	16	2.71286	3.12525
2003	9	17	3.37588	2.81931
2003	9	18	4.0984	4.25021
2003	9	19	3.34283	3.6508
2003	9	20	3.58929	3.94027
2003	9	21	5.18655	5.25383
2003	9	22	4.46418	4.60163
2003	9	23	4.36641	4.43024
2003	9	24	2.91455	3.34673
2003	9	25	2.86213	3.02496
2003	9	26	2.80268	3.22851
2003	9	27	2.89014	3.10891
2003	9	28	2.66542	2.81473
2003	9	29	3.00395	3.10143
2003	9	30	3.44707	3.22169
2003	10	1	2.26761	2.09192
2003	10	2	1.90135	2.34338
2003	10	3	2.07379	2.50199
2003	10	4	2.45529	2.72887
2003	10	5	2.07071	2.67452
2003	10	6	1.83275	2.56747
2003	10	7	1.98643	2.636
2003	10	8	2.43608	2.35601
2003	10	9	1.56673	2.14622
2003	10	10	1.90088	2.44195
2003	10	11	2.16795	2.66544
2003	10	12	2.08532	2.32684
2003	10	13	1.99367	2.20156
2003	10	14	1.87582	2.17391
2003	10	15	2.17648	2.51234
2003	10	16	2.20254	2.47779
2003	10	17	1.98744	2.25216
2003	10	18	1.98915	2.12833
2003	10	19	1.99582	2.16608
2003	10	20	1.82622	1.81148
2003	10	21	1.74729	2.07486
2003	10	22	1.61051	2.14656
2003	10	23	1.80581	2.21895
2003	10	24	1.6455	1.39588
2003	10	25	2.15355	2.11295
2003	10	26	2.61758	1.98092
2003	10	27	2.93058	2.83799
2003	10	28	2.35923	2.05671
2003	10	29	2.25903	2.87199
2003	10	30	1.8767	1.9119
2003	10	31	1.64857	0.901856
2004	4	1	3.1669	2.9297
2004	4	2	4.19799	3.37115
2004	4	3	3.88588	4.43566
2004	4	4	3.44268	4.83576
2004	4	5	3.2907	3.60639
2004	4	6	2.95856	2.5232
2004	4	7	3.15435	3.19949
2004	4	8	3.14053	3.03281
2004	4	9	3.24876	3.00628
2004	4	10	4.2857	3.90843
2004	4	11	4.2731	3.96105
2004	4	12	4.01895	3.94319
2004	4	13	3.99539	3.58973
2004	4	14	3.61005	3.15324
2004	4	15	4.01959	3.65896
2004	4	16	3.74765	4.16895
2004	4	17	3.6959	3.51024
2004	4	18	2.75182	1.62017
2004	4	19	3.62772	3.67218
2004	4	20	3.58268	2.99138
2004	4	21	2.23941	1.3051
2004	4	22	3.066	3.19388
2004	4	23	3.12958	2.56773
2004	4	24	3.30925	3.03731
2004	4	25	2.92486	3.24242
2004	4	26	4.08951	4.21538
2004	4	27	6.30414	5.29978
2004	4	28	3.7909	3.95551
2004	4	29	4.12253	4.41352
2004	4	30	3.44724	2.73672
2004	5	1	4.43236	3.7965
2004	5	2	4.84684	3.56917
2004	5	3	4.1503	2.84516
2004	5	4	3.83477	3.36377
2004	5	5	3.95036	3.64407
2004	5	6	3.83335	3.78425
2004	5	7	4.1732	4.60659
2004	5	8	4.0876	3.11332
2004	5	9	3.89225	3.59026
2004	5	10	6.59881	5.95142
2004	5	11	5.12665	3.025
2004	5	12	4.43433	3.88778
2004	5	13	4.58323	4.22465
2004	5	14	4.26624	3.97434
2004	5	15	4.25447	3.17949
2004	5	16	4.04264	3.98997
2004	5	17	3.66972	2.68841
2004	5	18	4.74708	4.22434
2004	5	19	3.96406	3.6808
2004	5	20	4.52602	4.7613
2004	5	21	4.75718	4.68892
2004	5	22	4.43896	4.37355
2004	5	23	4.56557	4.337
2004	5	24	4.53241	4.44895
2004	5	25	4.53637	4.4818
2004	5	26	4.59815	4.51651
2004	5	27	4.51795	4.40731
2004	5	28	4.29336	4.576
2004	5	29	4.30475	4.25154
2004	5	30	4.37153	4.56051
2004	5	31	3.37036	3.61743
2004	6	1	4.87583	4.17014
2004	6	2	4.37934	3.94516
2004	6	3	4.60051	4.34686
2004	6	4	4.56962	4.60341
2004	6	5	4.73917	4.78592
2004	6	6	5.15316	4.89911
2004	6	7	5.13693	5.0586
2004	6	8	5.12493	4.3531
2004	6	9	5.02624	4.8826
2004	6	10	5.04937	5.19806
2004	6	11	5.01144	5.26073
2004	6	12	4.92607	5.1128
2004	6	13	5.00159	5.13054
2004	6	14	5.01045	5.06913
2004	6	15	5.17331	5.24307
2004	6	16	5.01846	4.85636
2004	6	17	5.10543	4.90701
2004	6	18	4.96667	4.92615
2004	6	19	4.76157	4.30464
2004	6	20	5.2425	5.12719
2004	6	21	4.66117	4.56553
2004	6	22	4.47407	4.31993
2004	6	23	4.603	4.17248
2004	6	24	4.60048	4.64124
2004	6	25	4.53967	4.54733
2004	6	26	4.57033	4.95063
2004	6	27	4.96758	5.32793
2004	6	28	5.07333	5.23187
2004	6	29	5.69624	6.00069
2004	6	30	5.25913	5.38292
2004	7	1	4.89181	5.20188
2004	7	2	4.95791	5.57544
2004	7	3	4.88453	5.33506
2004	7	4	5.09934	5.26054
2004	7	5	4.96956	5.5344
2004	7	6	5.29349	5.75361
2004	7	7	5.27818	5.57937
2004	7	8	4.95371	5.21603
2004	7	9	4.87779	4.36678
2004	7	10	4.78736	5.6467
2004	7	11	5.16076	5.67838
2004	7	12	5.00088	5.1478
2004	7	13	5.05337	5.24597
2004	7	14	4.98542	4.61886
2004	7	15	5.99455	5.69289
2004	7	16	4.52241	4.85597
2004	7	17	4.93642	5.46293
2004	7	18	5.0159	5.34573
2004	7	19	5.17354	5.57853
2004	7	20	4.87501	5.36121
2004	7	21	5.27324	5.04865
2004	7	22	5.1222	5.28247
2004	7	23	4.89874	5.34559
2004	7	24	4.69931	4.98856
2004	7	25	5.02777	4.85871
2004	7	26	4.48065	4.37658
2004	7	27	4.39338	4.17411
2004	7	28	4.49386	4.09475
2004	7	29	4.83263	4.76613
2004	7	30	4.6428	4.88448
2004	7	31	4.6855	4.67656
2004	8	1	4.32666	4.19839
2004	8	2	4.46642	4.6071
2004	8	3	4.24003	4.2743
2004	8	4	4.15829	4.48312
2004	8	5	4.05555	4.26912
2004	8	6	4.62205	4.34
2004	8	7	4.26619	4.11036
2004	8	8	4.48435	3.97043
2004	8	9	4.23161	4.33918
[truncated: 3,294 more rows]

## Sheet: ETo(-u, -ea, -Rs)
Year	Month	Day	ETo-missing-u-ea-Rs	ETo-full data
[truncated: 4,710 more rows]

[truncated: 13 more sheets: MLR-1 model, MLR-2 model, MLR-3 model, MLR-4 model, MLR-5 model, MLR-6 model, MLR-7 model, MLR-8 model, MLR-9 model, MLR-10 model, MLR-11 model, MLR-12 model, MLR-13 model]
